# Supplementary material for: m6A-mediated DGUOK-AS1 stabilized by RBM15 and HNRNPH1 promotes lung adenocarcinoma progression
Source: Research Square preprint supplement (doi:10.21203/rs.3.rs-7158958/v1), 2025-08-06
Supplement: Supplementary file 1 [file 07726be36e767436837c6b01.xlsx]

## Sheet: PRIMER
Supplemental Table 1. List of primers, shRNA, siRNA, microRNA and probe used in this study
qRT-PCR primers
Gene Name	Species	Forward	Rerverse
DGUOK-AS1	Homo sapiens	ACACTGTTGGATGCTGCTGA	GCTCCACTTTGAGGCTCTGA
DGUOK-AS1 202		GGGAAATCTCCTTGCTAGAGGA	TCAGCAGCATCCAACAGTGT
miR-2467-5p		TGAGGCTCTGTTAGCCTTGGCT	AGCCAAGGCTAACAGAGCCTCA
5S rRNA		GCCATACCACCCTGAACG	CGAACATGTACAGTCCATGGATAG
PRMT5		GTACATCTATGGGCTGTGATTCC	GATATTCCAGGGAGTTCTTGAGG
RBM15		GGCTGCCTGAGGAGAGTGGAG	CGGCTACTGCTCAATTCTGGACTG
HNRNPH1		GTCCAAATAGTCCTGACACGG	TCCACCGGCAATGTTATCCC
U6		CTCGCTTCGGCAGCACA	AACGCTTCACGAATTTGCGT
GAPDH		GTGAACCATGAGAAGTATG	CGGCCATCACGCCACAGTTTC
PCR primers
Name	Species	Forward	Rerverse
DGUOK-AS1 201	Homo sapiens	CGGATATCGGACCAAGCAGGCAGCTTC	TTGCGGCCGCTGGAGCACAACCCATACCCC
T7-201-Exon1		TAATACGACTCACTATAGGGGGAAGCCCTAAGAACTCA	CTGAGAGTTCAGCAGCATCCAA
T7-201-Exon2		CGCCTAATACGACTCACTATAGGGAAAAATCATCATTGACATCC	ACATGCAGTTTCTTTGAAAAGTC
T7-201-Exon1+2		TAATACGACTCACTATAGGGGGAAGCCCTAAGAACTCAACATGCAGTTTCTTTGAAAAGTC
DGUOK-AS1 202		CCGGATATCGTGACTTCGCGCCG	TTGCGGCCGCACAAATAAAGCATGTGTTTATTGAAA
T7-202-Exon1		TAATACGACTCACTATAGGGGCTCCCGCGAGGTCAGAG	CTGAGGAGGTTAGTCACATC
T7-202-Exon2		CGCCTAATACGACTCACTATAGGGAAAAATCATCATTGACATCC	CTGTTTCCGGCCAACTTTATTG
T7-202-Exon1+2		TAATACGACTCACTATAGGGGCTCCCGCGAGGTCAGAG	CTGTTTCCGGCCAACTTTATTG
siRNAs
Name	Species	Sense	Antisense
Negative control	Homo sapiens	UUCUCCGAACGUGUCACGUTT	ACGUGACACGUUCGGAGAATT
si-DGUOK-AS1		CAUGGAGGGUGCGAAAUAATT	UUAUUUCGCACCCUCCAUGTT
		CUGUGGUUCUUCAGGAAGUTT	ACUUCCUGAAGAACCACAGTT
si-PRMT5		GGGACUGGAAUACGCUAAUTT	AUUAGCGUAUUCCAGUCCCTT
		GGACCUGAGAGAUGAUAUATT	UAUAUCAUCUCUCAGGUCCTT
si-HNRNPH1		GCUCAAGGUAUUCGUUUCATT	UGAAACGAAUACCUUGAGCTT
		GGAUUACCUUACAGAGCUATT	UAGCUCUGUAAGGUAAUCCTT
microRNA mimics
Name	Species	Sense	Antisense
NC-mimic	Homo sapiens	UUCUCCGAACGUGUCACGUTT	ACGUGACACGUUCGGAGAATT
miR-2467-5p mimic		UGAGGCUCUGUUAGCCUUGGCUC	GCCAAGGCUAACAGAGCCUCAUU
DGUOK-AS1 transcriptions RNA-FISH probe
Gene Name	species	Probe sequence	Probe modification
DGUOK-AS1	Homo sapiens	TCCT+TATT+TCGCACCCTCCA	5'-Biotin
DGUOK-AS1 202		TGAGGAGGT+TAGTCACA+TCAATCA	5'-Biotin
shRNAs and plasmids
Name	species	Catalogue number	Company name
sh-control	Homo sapiens	P29436	MiaoLing Biology
sh-RBM15-1		P48108	MiaoLing Biology
sh-RBM15-2		P48171	MiaoLing Biology
oe-control(RBM15)		P8196	MiaoLing Biology
oe-RBM15		P24503	MiaoLing Biology
oe-control(HNRNPH1)		P41171	MiaoLing Biology
oe-HNRNPH1		P55662	MiaoLing Biology
