# Supplementary material for: m6A-mediated DGUOK-AS1 stabilized by RBM15 and HNRNPH1 promotes lung adenocarcinoma progression
Source: Research Square preprint supplement (doi:10.21203/rs.3.rs-7158958/v1), 2025-08-06
Supplement: Supplementary file 2 [file 5a2ccf7d43d99149565009fb.xlsx]

## Sheet: LC-MS Results
Accession	Description	Sum PEP Score	Coverage [%]	# Peptides	# PSMs	# Unique Peptides	# AAs	MW [kDa]	calc. pI	Score Sequest HT: Sequest HT	Gene Symbol	Biological Process	Cellular Component	Molecular Function	Abundances (Normalized): F2: Sample
P11498	Pyruvate carboxylase, mitochondrial OS=Homo sapiens OX=9606 GN=PC PE=1 SV=2	9.399	6	5	7	5	1178	129.6	6.84	14.12	PC	other metabolic processes;other biological processes	cytosol;mitochondrion;other cell component	other molecular function	9.2653e+07
P68363	Tubulin alpha-1B chain OS=Homo sapiens OX=9606 GN=TUBA1B PE=1 SV=1	6.358	12	4	4	4	451	50.1	5.06	8.81	TUBA1B	cell cycle OR cell proliferation;cell organization and biogenesis;transport;other biological processes	cytoskeleton;other cell component	cytoskeletal activity;nucleic acid binding activity;other molecular function	124691948
P14923	Junction plakoglobin OS=Homo sapiens OX=9606 GN=JUP PE=1 SV=3	8.564	5	2	3	2	745	81.7	6.14	8.33	JUP	cell adhesion;cell-cell signaling;cell organization and biogenesis;signal transduction;other biological processes	non-structural extracellular;plasma membrane;other membranes;cytosol;cytoskeleton;nucleus;other cell component	other molecular function	1.90919e+07
P07437	Tubulin beta chain OS=Homo sapiens OX=9606 GN=TUBB PE=1 SV=2	3.244	9	3	3	3	444	49.6	4.89	8.21	TUBB	cell cycle OR cell proliferation;cell organization and biogenesis;stress response;transport;other biological processes	non-structural extracellular;other membranes;cytosol;cytoskeleton;nucleus;other cytoplasmic organelle;other cell component	signal transduction activity or receptor binding;cytoskeletal activity;other molecular function	80913034
P62805	Histone H4 OS=Homo sapiens OX=9606 GN=H4C1 PE=1 SV=2	5.113	22	2	2	2	103	11.4	11.36	5.49	H4C1; H4C11; H4C12; H4C13; H4C14; H4C15; H4C16; H4C2; H4C3; H4C4; H4C5; H4C6; H4C8; H4C9	cell organization and biogenesis;other biological processes	non-structural extracellular;nucleus;other cell component	nucleic acid binding activity;other molecular function	87262924
Q16778	Histone H2B type 2-E OS=Homo sapiens OX=9606 GN=H2BC21 PE=1 SV=3	3.832	12	1	2	1	126	13.9	10.32	4.82	H2BC21	cell organization and biogenesis;stress response	non-structural extracellular;cytosol;nucleus;other cell component	nucleic acid binding activity;other molecular function	18465162
P81605	Dermcidin OS=Homo sapiens OX=9606 GN=DCD PE=1 SV=2	2.984	13	1	2	1	110	11.3	6.54	4.71	DCD	protein metabolism;stress response;transport	non-structural extracellular;other membranes	transporter activity;other molecular function	12933043
P25705	ATP synthase subunit alpha, mitochondrial OS=Homo sapiens OX=9606 GN=ATP5F1A PE=1 SV=1	4.6	2	1	2	1	553	59.7	9.13	4.23	ATP5F1A	other metabolic processes;transport;other biological processes	plasma membrane;other membranes;mitochondrion;other cell component	signal transduction activity or receptor binding;transporter activity;other molecular function	601503856
P46783	40S ribosomal protein S10 OS=Homo sapiens OX=9606 GN=RPS10 PE=1 SV=1	4.041	9	1	2	1	165	18.9	10.15	3.84	RPS10	protein metabolism;other metabolic processes	cytosol;translational apparatus;nucleus;other cell component	other molecular function	5.25426e+06
P33764	Protein S100-A3 OS=Homo sapiens OX=9606 GN=S100A3 PE=1 SV=1	8.377	20	1	2	1	101	11.7	4.78	2.61	S100A3		plasma membrane;other membranes;cytosol;ER/Golgi	other molecular function	25945500
P02768	Albumin OS=Homo sapiens OX=9606 GN=ALB PE=1 SV=2	2.535	2	1	2	1	609	69.3	6.28	2.51	ALB	stress response;other biological processes	non-structural extracellular;ER/Golgi;other cell component	nucleic acid binding activity;other molecular function	12621895
P05109	Protein S100-A8 OS=Homo sapiens OX=9606 GN=S100A8 PE=1 SV=1	1.169	12	1	1	1	93	10.8	7.03	2.27	S100A8	cell adhesion;cell-cell signaling;protein metabolism;other metabolic processes;stress response;transport;developmental processes;other biological processes	non-structural extracellular;plasma membrane;other membranes;cytosol;cytoskeleton;other cell component	signal transduction activity or receptor binding;cytoskeletal activity;other molecular function	5.37721e+06
P62987	Ubiquitin-60S ribosomal protein L40 OS=Homo sapiens OX=9606 GN=UBA52 PE=1 SV=2	1.082	13	1	1	1	128	14.7	9.83	2.18	UBA52	protein metabolism;other metabolic processes	plasma membrane;other membranes;cytosol;mitochondrion;ER/Golgi;translational apparatus;nucleus;other cytoplasmic organelle;other cell component	other molecular function	15206132
O76031	ATP-dependent Clp protease ATP-binding subunit clpX-like, mitochondrial OS=Homo sapiens OX=9606 GN=CLPX PE=1 SV=2	1.511	2	1	1	1	633	69.2	7.58	2.02	CLPX	protein metabolism;other metabolic processes	other membranes;cytosol;mitochondrion;nucleus;other cell component	enzyme regulator activity;other molecular function	83371576
P04406	Glyceraldehyde-3-phosphate dehydrogenase OS=Homo sapiens OX=9606 GN=GAPDH PE=1 SV=3	2.769	4	1	1	1	335	36	8.46	1.89	GAPDH	cell organization and biogenesis;protein metabolism;other metabolic processes;stress response;other biological processes	plasma membrane;other membranes;cytosol;cytoskeleton;nucleus;other cell component	enzyme regulator activity;cytoskeletal activity;other molecular function	10469196
P31943	Heterogeneous nuclear ribonucleoprotein H OS=Homo sapiens OX=9606 GN=HNRNPH1 PE=1 SV=4	2.396	3	1	1	1	449	49.2	6.3	1.69	HNRNPH1	RNA metabolism OR transcription;other metabolic processes;other biological processes	cytosol;nucleus;other cell component	nucleic acid binding activity;other molecular function	10920067
Accession	Description	Sum PEP Score	Coverage [%]	# Peptides	# PSMs	# Unique Peptides	# AAs	MW [kDa]	calc. pI	Score Sequest HT: Sequest HT	Gene Symbol	Biological Process	Cellular Component	Molecular Function	Abundances (Normalized): F2: Sample
P27482	Calmodulin-like protein 3 OS=Homo sapiens OX=9606 GN=CALML3 PE=1 SV=2	2.091	19	2	2	2	149	16.9	4.42	0	CALML3			other molecular function
P68104	Elongation factor 1-alpha 1 OS=Homo sapiens OX=9606 GN=EEF1A1 PE=1 SV=1	1.881	3	1	1	1	462	50.1	9.01	0	EEF1A1	protein metabolism;other metabolic processes;other biological processes	non-structural extracellular;plasma membrane;other membranes;cytosol;cytoskeleton;translational apparatus;nucleus;other cytoplasmic organelle;other cell component	nucleic acid binding activity;other molecular function	6.24228e+06
O75449	Katanin p60 ATPase-containing subunit A1 OS=Homo sapiens OX=9606 GN=KATNA1 PE=1 SV=1	1.478	2	1	2	1	491	55.9	6.9	0	KATNA1	cell cycle OR cell proliferation;cell organization and biogenesis;other biological processes	cytoskeleton;other cell component	cytoskeletal activity;other molecular function	26933294
P15924	Desmoplakin OS=Homo sapiens OX=9606 GN=DSP PE=1 SV=3	1.096	0	1	1	1	2871	331.6	6.81	0	DSP	cell adhesion;cell organization and biogenesis;protein metabolism;other metabolic processes;stress response;developmental processes;other biological processes	plasma membrane;other membranes;cytoskeleton;other cell component	cytoskeletal activity;other molecular function	11725986
P0DPA2	V-set and immunoglobulin domain-containing protein 8 OS=Homo sapiens OX=9606 GN=VSIG8 PE=2 SV=1	1.023	4	1	1	1	414	43.9	7.2	0	VSIG8		other membranes
Q01813	ATP-dependent 6-phosphofructokinase, platelet type OS=Homo sapiens OX=9606 GN=PFKP PE=1 SV=2	0.97	3	1	1	1	784	85.5	7.55	0	PFKP	other metabolic processes;other biological processes	cytosol;other cell component	kinase activity;other molecular function
Q96RT6	cTAGE family member 2 OS=Homo sapiens OX=9606 GN=CTAGE1 PE=1 SV=2	0.893	2	1	1	1	745	85.2	6.16	0	CTAGE1	transport	other membranes;ER/Golgi		93739032
O15050	TPR and ankyrin repeat-containing protein 1 OS=Homo sapiens OX=9606 GN=TRANK1 PE=2 SV=4	0.893	0	1	1	1	2925	336	6.76	0	TRANK1				36087356
