# Supplementary material for: m6A-mediated DGUOK-AS1 stabilized by RBM15 and HNRNPH1 promotes lung adenocarcinoma progression
Source: Research Square preprint supplement (doi:10.21203/rs.3.rs-7158958/v1), 2025-08-06
Supplement: Supplementary file 3 [file 5ca3bcb9bd59fd2fa2c8158c.xlsx]

## Sheet: Sheet2
ProbeName	P value	T/C	[C](raw)	[P](raw)	[C](normalized)	[P](normalized)	[CHN-LC-](raw)	[CWL-LC-](raw)	[HJP-LC-](raw)	[LSF-LC-](raw)	[ZGC-LC-](raw)		[CHN-LC+](raw)	[CWL-LC+](raw)	[HJP-LC+](raw)	[LSF-LC+](raw)	[ZGC-LC+](raw)		[CHN-LC+](normalized)	[CHN-LC-](normalized)	[CWL-LC+](normalized)	[CWL-LC-](normalized)	[HJP-LC+](normalized)	[HJP-LC-](normalized)	[LSF-LC+](normalized)	[LSF-LC-](normalized)	[ZGC-LC+](normalized)	[ZGC-LC-](normalized)	CHN-LC+	CHN-LC-	CWL-LC+	CWL-LC-	HJP-LC+	HJP-LC-	LSF-LC+	LSF-LC-	ZGC-LC+	ZGC-LC-	type	seqname	GeneSymbol	source	RNAlength	chrom	strand	txStart	txEnd	Sequence	relationship
ASHGA5P038691	6.64395e-07	4.51783	753.401	166.762	9.2926	7.554	152.138	207.024	183.949	151.251	139.447	166.762	574.149	668.758	762.132	1087.39	674.576	753.401	8.81574	7.09944	9.0637	7.37613	9.59596	7.92531	9.80407	8.02978	9.18355	7.33936	P	P	P	P	P	P	P	P	P	P	noncoding	ENST00000430621	AC034193.5	GENCODE	683	chr3	+	10045951	10048674	GAGCCTGCAGCACTTTCCTGCAAAGCTCTATTTTATCTTTTTAAATAAAAATGGTTACTG	natural antisense
ASHGA5P035299	0.0360035	25.9665	8209.84	316.171	11.3162	8.32853	285.212	640.953	153.688	184.874	316.128	316.171	1955.41	22859.2	208.467	1689.85	14336.3	8209.84	10.5662	8.06463	14.3026	8.9853	7.7772	7.67293	10.4261	8.33	13.5089	8.58977	P	P	P	P	P	P	P	P	P	P	noncoding	uc002tpz.2	LOC440905	UCSC_knowngene	4525	chr2	-	130783571	130808704	GGCATAAGTCTACTCACTTATATCTGTCTGGAACATAACGCTTGTTTGTTTTTACAACAA	intergenic
ASHGA5P030363	0.0392839	18.0775	1573.29	87.0302	9.4438	6.52961	82.8164	113.341	84.4812	48.5557	105.956	87.0302	1941.69	2807.43	277.506	78.4307	2761.41	1573.29	10.5554	6.1283	11.1217	6.52247	8.17043	6.82032	6.14782	6.25877	11.2237	6.91819	P	P	P	P	P	P	P	P	P	P	noncoding	uc021pbg.1	BC005081	UCSC_knowngene	1971	chr1	-	156611456	156613427	GTGGATGAAGGGAGAATGGGGGCTTTGCTCCTGAAAAGAGACACCCTTTCTAATAAAAAA	natural antisense
ASHGA5P030363	0.0392839	18.0775	1573.29	87.0302	9.4438	6.52961	82.8164	113.341	84.4812	48.5557	105.956	87.0302	1941.69	2807.43	277.506	78.4307	2761.41	1573.29	10.5554	6.1283	11.1217	6.52247	8.17043	6.82032	6.14782	6.25877	11.2237	6.91819	P	P	P	P	P	P	P	P	P	P	noncoding	uc021pbg.1	BC005081	UCSC_knowngene	1971	chr1	-	156611456	156613427	GTGGATGAAGGGAGAATGGGGGCTTTGCTCCTGAAAAGAGACACCCTTTCTAATAAAAAA	natural antisense
ASHGA5P037534	0.0129439	16.016	758.774	47.3761	8.57117	5.48131	32.2096	100.469	39.4204	38.6291	26.1528	47.3761	73.8865	1121.46	144.067	1513.8	940.659	758.774	5.88185	4.59012	9.79321	6.34881	7.23927	5.72084	10.2599	5.88174	9.68156	4.86503	P	P	P	P	P	P	P	P	P	P	noncoding	ENST00000413768	AP000525.8	GENCODE	2102	chr22	-	16150528	16193004	TGGGAGTCTATTCTTCTTCCAAAAGTGCAAGCTAAGCCTTCTGAAGATGGTAAAGAACTT	intron sense-overlapping
ASHGA5P033399	5.52963e-05	15.3473	841.035	54.8	9.19978	5.68662	27.6215	100.313	71.3255	37.3102	37.43	54.8	267.881	1241.75	1189.28	1161.58	344.676	841.035	7.72823	4.31456	9.92418	6.34691	10.2061	6.57888	9.89574	5.81904	8.24465	5.37369	P	P	P	P	P	P	P	P	P	P	noncoding	ENST00000576963	RP11-353N14.2	GENCODE	1788	chr17	+	77797250	77801503	CCTTATCCAAACAGTTCACACGAAGACCAGATCCAAAAATAAAAGTGTGCTTTGTCCTCT	intergenic
ASHGA5P034594	0.0230954	14.8499	1180.91	79.5233	9.3261	6.34183	58.0652	147.721	68.0119	58.024	65.7947	79.5233	1568.24	2043.56	227.896	165.447	1899.41	1180.91	10.2432	5.56898	10.6574	6.89004	7.89547	6.51171	7.16175	6.54493	10.6727	6.19346	P	P	P	P	P	P	P	P	P	P	noncoding	uc002oet.3	BC024306	UCSC_knowngene	1291	chr19	+	37266689	37267980	ATGAGATCCGTGCTTTTATCTTGTCTCAGACTCCCAATGATAGGCACATACTCTCCTCTG	intergenic
ASHGA5P035259	0.0400137	14.8329	3311.79	223.274	10.6566	7.66961	60.9654	365.46	313.02	266.121	110.802	223.274	5863.23	1352.53	737.852	8067.04	538.3	3311.79	12.1323	5.64767	10.0571	8.18258	9.54404	8.67419	12.6747	8.85676	8.87491	6.98682	P	P	P	P	P	P	P	P	P	P	noncoding	NR_036580	LOC389023	RefSeq	744	chr2	-	115901624	115918920	GGAGCTTCCTTGCAAGTAAGTGAGTGAGCCAATCAAATAATTTATGTTTAAATCTTTCAC	intronic antisense
ASHGA5P035259	0.0400137	14.8329	3311.79	223.274	10.6566	7.66961	60.9654	365.46	313.02	266.121	110.802	223.274	5863.23	1352.53	737.852	8067.04	538.3	3311.79	12.1323	5.64767	10.0571	8.18258	9.54404	8.67419	12.6747	8.85676	8.87491	6.98682	P	P	P	P	P	P	P	P	P	P	noncoding	NR_036580	LOC389023	RefSeq	744	chr2	-	115901624	115918920	GGAGCTTCCTTGCAAGTAAGTGAGTGAGCCAATCAAATAATTTATGTTTAAATCTTTCAC	intronic antisense
ASHGA5P035259	0.0400137	14.8329	3311.79	223.274	10.6566	7.66961	60.9654	365.46	313.02	266.121	110.802	223.274	5863.23	1352.53	737.852	8067.04	538.3	3311.79	12.1323	5.64767	10.0571	8.18258	9.54404	8.67419	12.6747	8.85676	8.87491	6.98682	P	P	P	P	P	P	P	P	P	P	noncoding	NR_036580	LOC389023	RefSeq	744	chr2	-	115901624	115918920	GGAGCTTCCTTGCAAGTAAGTGAGTGAGCCAATCAAATAATTTATGTTTAAATCTTTCAC	intronic antisense
ASHGA5P032676	0.0221852	14.7806	1816.36	122.888	9.1126	6.67353	70.9872	248.317	23.7313	186.186	85.22	122.888	137.522	6937.71	202.392	1413.49	390.686	1816.36	6.77614	5.89421	12.4708	7.63648	7.72733	4.91441	10.1632	8.33906	8.42557	6.58348	P	P	P	P	P	P	P	P	P	P	noncoding	uc021uec.1	EPR-1	UCSC_knowngene	624	chr17	-	76220156	76220780	TTGTTAAACAGTAGAGGAGCCAGGGACTCTGTCTCCATTCTCTCATCACACACAAGTCAT	natural antisense
ASHGA5P032676	0.0221852	14.7806	1816.36	122.888	9.1126	6.67353	70.9872	248.317	23.7313	186.186	85.22	122.888	137.522	6937.71	202.392	1413.49	390.686	1816.36	6.77614	5.89421	12.4708	7.63648	7.72733	4.91441	10.1632	8.33906	8.42557	6.58348	P	P	P	P	P	P	P	P	P	P	noncoding	uc021uec.1	EPR-1	UCSC_knowngene	624	chr17	-	76220156	76220780	TTGTTAAACAGTAGAGGAGCCAGGGACTCTGTCTCCATTCTCTCATCACACACAAGTCAT	natural antisense
ASHGA5P032676	0.0221852	14.7806	1816.36	122.888	9.1126	6.67353	70.9872	248.317	23.7313	186.186	85.22	122.888	137.522	6937.71	202.392	1413.49	390.686	1816.36	6.77614	5.89421	12.4708	7.63648	7.72733	4.91441	10.1632	8.33906	8.42557	6.58348	P	P	P	P	P	P	P	P	P	P	noncoding	uc021uec.1	EPR-1	UCSC_knowngene	624	chr17	-	76220156	76220780	TTGTTAAACAGTAGAGGAGCCAGGGACTCTGTCTCCATTCTCTCATCACACACAAGTCAT	natural antisense
ASHGA5P041658	0.018614	14.7198	3848.87	261.475	10.8059	8.09395	222.41	517.196	157.791	181.405	228.573	261.475	1201.71	7075.21	375.299	1390.42	9201.69	3848.87	9.86455	7.68121	12.5035	8.67363	8.60557	7.70915	10.1376	8.30399	12.9184	8.10176	P	P	P	P	P	P	P	P	P	P	noncoding	ENST00000561592	RP3-512B11.3	GENCODE	888	chr6	-	7540683	7541571	GGATACAGACCCAGTCACACCATCCATGAAAAGCTGTTTCTATAATATGAAAAATTGTTA	bidirectional
ASHGA5P041658	0.018614	14.7198	3848.87	261.475	10.8059	8.09395	222.41	517.196	157.791	181.405	228.573	261.475	1201.71	7075.21	375.299	1390.42	9201.69	3848.87	9.86455	7.68121	12.5035	8.67363	8.60557	7.70915	10.1376	8.30399	12.9184	8.10176	P	P	P	P	P	P	P	P	P	P	noncoding	ENST00000561592	RP3-512B11.3	GENCODE	888	chr6	-	7540683	7541571	GGATACAGACCCAGTCACACCATCCATGAAAAGCTGTTTCTATAATATGAAAAATTGTTA	bidirectional
ASHGA5P054665	0.0320702	13.6156	7473.18	548.867	11.3774	8.52476	1877.99	340.085	137.088	137.523	251.655	548.867	11115.4	4353.32	581.806	504.494	20810.9	7473.18	13.0672	10.8922	11.789	8.08194	9.20259	7.50931	8.72778	7.89518	14.1004	8.24511	P	P	P	P	P	P	P	P	P	P	noncoding	uc021qbz.1	H19	UCSC_knowngene	2389	chr11	-	2016405	2019065	CTATCTCTAGGTGAAGCTAGAGGAACCAGACCTCATCAGCCCAACATCAAAGACACCATC	intergenic
ASHGA5P014724	0.0252769	13.2032	9143.45	692.517	11.7127	8.81475	2372.35	442.967	155.011	143.047	349.212	692.517	12170.9	5817.3	696.713	689.492	26342.9	9143.45	13.2027	11.2277	12.2204	8.45028	9.45921	7.6852	9.17144	7.95312	14.5095	8.75744	P	P	P	P	P	P	P	P	P	P	noncoding	uc001lva.4	H19	UCSC_knowngene	2302	chr11	-	2016405	2019065	GCTCTGGAAGCTAGAGGAACCAGACCTCATCAGCCCAACATCAAAGACACCATCGGAACA	intergenic
ASHGA5P037535	0.0117245	13.1761	632.69	48.0182	8.42116	5.36264	21.431	113.892	43.246	34.2831	27.2389	48.0182	101.026	595.488	122.177	1221.22	1123.54	632.69	6.32037	3.83773	8.8931	6.52689	7.01263	5.85332	9.96433	5.67264	9.91537	4.92263	P	P	P	P	P	P	P	P	P	P	noncoding	uc002zku.3	BC017398	UCSC_knowngene	1387	chr22	-	16179617	16181004	GCTTACACCATTAGTCATAGATTCAGTGTCAGCTATGACAATTGAAAATAAGCTGTTTTG	intergenic
ASHGA5P017469	0.0243845	12.7512	7524.83	590.125	11.3596	8.54947	2010.45	388.111	123.854	107.953	320.259	590.125	11163.5	4889.24	580.009	424.803	20566.6	7524.83	13.0799	10.989	11.9645	8.26341	9.19456	7.36489	8.48373	7.51933	14.0753	8.61073	P	P	P	P	P	P	P	P	P	P	noncoding	ENST00000442037	H19	GENCODE	798	chr11	-	2016405	2017421	CCACAACATGAAAGCTTGGAAATGAATATGCTGCACTTTACAACCACTGCACTACCTGAC	intergenic
ASHGA5P021982	0.00596439	11.364	1462.68	128.712	9.99689	7.09933	101.52	185.301	125.515	158.62	72.6045	128.712	715.984	2015.04	387.366	1970.91	2224.12	1462.68	9.14518	6.45093	10.6359	7.21749	8.64644	7.38245	10.6429	8.10291	10.9141	6.34285	P	P	P	P	P	P	P	P	P	P	noncoding	ENST00000549813	CTD-2314B22.3	GENCODE	1013	chr14	-	19883542	19925288	GGTCTCCGCGGTTTCTTCATGTGGCTGCAGATGGCAGGATTTCCCAAAGGTTTCTGGCTG	intergenic
ASHGA5P057644	0.0188735	10.5335	465.307	44.174	8.21603	5.53531	39.5034	66.52	40.17	38.8095	35.8671	44.174	1007.5	562.435	153.014	107.12	496.463	465.307	9.61108	4.93718	8.80644	5.78604	7.31911	5.75046	6.57926	5.88911	8.76427	5.31376	P	P	P	P	P	P	P	P	P	P	noncoding	TCONS_00020322	XLOC_009653	LincRNAs identified by Cabili et al	832	chr12	+	9600968	9614245	TGGAATGACAGGTAATGGAGAGTGAGGAGATTTTACCTGATATGGTCCTGTTTGCACCGT	intergenic
ASHGA5P053945	0.000971586	10.1966	1937.85	190.049	10.6146	7.69363	147.168	152.54	314.497	152.878	183.163	190.049	2905.27	1252.87	1761.43	1875.82	1893.84	1937.85	11.1415	7.04621	9.93946	6.93396	10.7454	8.67901	10.5789	8.04591	10.6677	7.76307	P	P	P	P	P	P	P	P	P	P	noncoding	ENST00000443294	RP11-480I12.5	GENCODE	1835	chr1	-	202820955	202830736	TAACACCTGGTCTCTCGCACCACAGTTGTGTGTGTATCTCATTCCACTGTTCCCTGACCC	intergenic
ASHGA5P054938	2.19982e-05	9.91447	854.365	86.1735	9.37704	6.50632	52.2114	65.5409	132.113	89.8698	91.1321	86.1735	517.598	495.983	1020.9	1468.48	768.866	854.365	8.66574	5.3994	8.62792	5.76476	9.99113	7.46019	10.2221	7.2265	9.3783	6.68078	P	P	P	P	P	P	P	P	P	P	noncoding	ENST00000544553	RP11-783K16.5	GENCODE	391	chr11	+	64013435	64015689	CTGCATTTCCTCAGAAGGCTGTAACAAAGATTAAATAGGAAAATTCGTGGAAAGTTCAAT	intronic antisense
ASHGA5P019028	0.00874771	9.80906	349.893	35.6704	8.00768	5.1051	67.2123	33.1835	21.0384	23.0356	33.8822	35.6704	159.447	503.71	491.15	116.72	478.439	349.893	6.99272	5.8079	8.65197	4.81193	8.97723	4.71389	6.70248	4.95951	8.71399	5.23229	P	P	P	P	P	P	P	P	P	P	noncoding	NR_037894	ZNF670-ZNF695	RefSeq	1119	chr1	-	247108848	247242115	TACAGAAACCTGATCTCCCTTGGTCTTGCTATGTCTAAGCCAGAACTGATCATCTGTCTG	exon sense-overlapping
ASHGA5P019028	0.00874771	9.80906	349.893	35.6704	8.00768	5.1051	67.2123	33.1835	21.0384	23.0356	33.8822	35.6704	159.447	503.71	491.15	116.72	478.439	349.893	6.99272	5.8079	8.65197	4.81193	8.97723	4.71389	6.70248	4.95951	8.71399	5.23229	P	P	P	P	P	P	P	P	P	P	noncoding	NR_037894	ZNF670-ZNF695	RefSeq	1119	chr1	-	247108848	247242115	TACAGAAACCTGATCTCCCTTGGTCTTGCTATGTCTAAGCCAGAACTGATCATCTGTCTG	exon sense-overlapping
ASHGA5P019028	0.00874771	9.80906	349.893	35.6704	8.00768	5.1051	67.2123	33.1835	21.0384	23.0356	33.8822	35.6704	159.447	503.71	491.15	116.72	478.439	349.893	6.99272	5.8079	8.65197	4.81193	8.97723	4.71389	6.70248	4.95951	8.71399	5.23229	P	P	P	P	P	P	P	P	P	P	noncoding	NR_037894	ZNF670-ZNF695	RefSeq	1119	chr1	-	247108848	247242115	TACAGAAACCTGATCTCCCTTGGTCTTGCTATGTCTAAGCCAGAACTGATCATCTGTCTG	exon sense-overlapping
ASHGA5P019028	0.00874771	9.80906	349.893	35.6704	8.00768	5.1051	67.2123	33.1835	21.0384	23.0356	33.8822	35.6704	159.447	503.71	491.15	116.72	478.439	349.893	6.99272	5.8079	8.65197	4.81193	8.97723	4.71389	6.70248	4.95951	8.71399	5.23229	P	P	P	P	P	P	P	P	P	P	noncoding	NR_037894	ZNF670-ZNF695	RefSeq	1119	chr1	-	247108848	247242115	TACAGAAACCTGATCTCCCTTGGTCTTGCTATGTCTAAGCCAGAACTGATCATCTGTCTG	exon sense-overlapping
ASHGA5P054299	0.00265171	9.71674	3195.94	328.911	11.1214	8.50946	229.347	436.534	371.918	216.616	390.138	328.911	2242.7	1392.48	7065.63	1654.68	3624.21	3195.94	10.7645	7.72532	10.0986	8.42201	12.7323	8.92774	10.3964	8.55632	11.615	8.91591	P	P	P	P	P	P	P	P	P	P	noncoding	ENST00000454631	RP11-295G20.2	GENCODE	458	chr1	-	231658262	231664302	TCTACAAGCCTCACAGCATGCACTGTTACTAAAAAGACGATGCGTCCTCCTGGACCTGAG	natural antisense
ASHGA5P031058	0.0279406	9.5504	3444.79	360.696	10.8811	8.6481	285.804	463.267	431.786	214.197	408.423	360.696	1577.21	10444.4	1404.1	721.125	3077.1	3444.79	10.2523	8.0665	13.0981	8.51843	10.4394	9.13825	9.23288	8.53462	11.3829	8.98267	P	P	P	P	P	P	P	P	P	P	noncoding	NR_046290	LOC100289092	RefSeq	535	chr16	-	28890277	28891242	GAATCAGGCCACCTTGAGGTTCATCAAGTTCATCCCATTAAAACCTCCCAAAACTCTGGA	natural antisense
ASHGA5P031058	0.0279406	9.5504	3444.79	360.696	10.8811	8.6481	285.804	463.267	431.786	214.197	408.423	360.696	1577.21	10444.4	1404.1	721.125	3077.1	3444.79	10.2523	8.0665	13.0981	8.51843	10.4394	9.13825	9.23288	8.53462	11.3829	8.98267	P	P	P	P	P	P	P	P	P	P	noncoding	NR_046290	LOC100289092	RefSeq	535	chr16	-	28890277	28891242	GAATCAGGCCACCTTGAGGTTCATCAAGTTCATCCCATTAAAACCTCCCAAAACTCTGGA	natural antisense
ASHGA5P032023	0.000967922	9.50903	270.634	28.4607	7.75736	4.86418	32.1664	37.6806	26.5996	24.7432	21.1138	28.4607	233.149	119.394	247.543	472.305	280.778	270.634	7.54169	4.58772	6.64922	4.9933	8.01431	5.10214	8.63783	5.07866	7.94374	4.55909	P	P	M	P	P	P	P	P	P	P	noncoding	ENST00000419190	RP11-465N4.4	GENCODE	788	chr1	-	201969221	201979481	AGAGATTCAGCAACAAAGAGGCCTAGTAGGGAGAGGAGTTACTAGGTTTAGGGGTTTTTC	intronic antisense
ASHGA5P028975	0.00798643	9.4396	2812.35	297.931	10.7061	7.99867	104.566	664.768	381.481	242.124	96.7141	297.931	447.769	4348.38	1078.56	5760.4	2426.61	2812.35	8.46396	6.49966	11.7872	9.03423	10.0643	8.9576	12.1801	8.72574	11.0347	6.77614	P	P	P	P	P	P	P	P	P	P	noncoding	ENST00000553153	CTD-2314B22.3	GENCODE	903	chr14	-	19880595	19925346	TGCTCACTGAAGAAAATTCCTAGAACAATTCAGGGTCCTTTCATAACCTCTACTCTGAGG	intergenic
ASHGA5P029399	0.02304	9.37029	953.821	101.792	8.79411	6.46708	36.4605	247.808	78.2941	90.0667	56.3305	101.792	58.1917	1205.99	208.076	2086.62	1210.22	953.821	5.56327	4.801	9.88462	7.63117	7.77395	6.71139	10.7287	7.22881	10.02	5.96302	P	P	P	P	P	P	P	P	P	P	noncoding	uc021rnj.1	BC016035	UCSC_knowngene	1170	chr14	+	19650031	19719035	TTGATTGTTAGGGAAGTATAACTTAAAAGTTTATAAAGTTTCACATACTTCTCTTTATAT	intergenic
ASHGA5P050965	0.000244951	9.14753	459.229	50.2025	8.41555	5.51226	46.3692	47.9573	107.358	28.8162	20.5116	50.2025	593.654	280.001	806.194	460.607	155.687	459.229	8.86554	5.20187	7.82118	5.328	9.6763	7.15899	8.59922	5.35826	7.11553	4.5142	P	P	P	P	P	P	P	P	P	P	noncoding	ENST00000400465	FER1L4	GENCODE	3350	chr20	-	34146513	34171889	TCTTTTTTAGGGCAAGGTGGAGGCAGAGTTTGAGCTGCTGACTGTGGAGGAGGCCGAGAA	intergenic
ASHGA5P013224	0.0407193	9.06377	10741	1185.05	12.4292	10.3121	893.689	2363.68	981.453	698.724	987.716	1185.05	17763.4	27254.1	3228.72	2075.64	3383.39	10741	13.7588	9.78523	14.5525	10.897	11.5865	10.2987	10.7182	10.271	11.5301	10.3084	P	P	P	P	P	P	P	P	P	P	noncoding	ENST00000391394	RP11-551L14.1	GENCODE	1058	chr12	-	31264592	31270405	TACGAAAAAGAAGAATATGCCCTAGCTTTTTACCACATCAACAGTAGTTCAGTTTCCGAG	intergenic
ASHGA5P048890	0.0085076	8.91217	332.021	37.2548	7.82385	5.23458	60.7477	43.8367	24.2205	31.6454	25.8238	37.2548	220.783	556.716	56.6785	339.311	486.617	332.021	7.46533	5.64278	8.79173	5.20742	5.9561	4.94852	8.17171	5.52626	8.73438	4.84791	P	P	P	P	P	P	P	P	P	P	noncoding	uc021suf.1	AK054710	UCSC_knowngene	2315	chr15	+	89939404	89941719	TTGTGGTTTCTGTACCATCACATGCCTATTTTAAGACACTCTCCAGCACTGTCGGTTAGG	intergenic
ASHGA5P037533	0.00617141	8.89699	1656.73	186.212	10.0425	7.40409	81.1998	380.072	263.02	127.845	78.9251	186.212	313.888	2785.09	768.438	2843.57	1572.67	1656.73	7.95296	6.10278	11.1087	8.23563	9.60667	8.43002	11.1592	7.7878	10.3848	6.46421	P	P	P	P	P	P	P	P	P	P	noncoding	ENST00000447898	AP000525.8	GENCODE	4136	chr22	-	16147978	16192971	AAGCTTTTACTTCTGGCAATTAAAGTTAATCATGTTAGAACACTGTCTAGGAATGGTTGG	intron sense-overlapping
ASHGA5P017466	0.00553289	8.88542	2840.47	319.678	10.8923	8.4868	391.527	416.638	306.434	220.337	263.453	319.678	2362.73	866.867	2156.95	6898.79	1917.02	2840.47	10.8543	8.5326	9.42752	8.35993	11.0491	8.64142	12.4436	8.58604	10.6869	8.31403	P	P	P	P	P	P	P	P	P	P	noncoding	ENST00000442010	HMGB3P22	GENCODE	597	chr5	+	179106032	179121650	AAGAGTCCGGAATTTTCCAAGAAGTGCTCTGAAAGGTGGAAGACAATGTCCGGGAAAGAG	natural antisense
ASHGA5P031128	0.0470273	8.79591	1626.2	184.881	9.5785	7.5934	223.697	284.991	191.433	140.749	83.5336	184.881	552.506	5905.74	477.12	498.431	697.176	1626.2	8.7553	7.68862	12.2545	7.82207	8.93587	7.97864	8.71722	7.92592	9.2296	6.55177	P	P	P	P	P	P	P	P	P	P	noncoding	ENST00000568752	RP11-989E6.10	GENCODE	3971	chr16	-	33344308	33348279	GTGCTTGTTATTAGTTGTATTACATGTAGGTCATGGTTTTGTACACATAACTCCAAACCA	intergenic
ASHGA5P028982	0.01905	8.71247	490.419	56.2893	8.21322	5.77834	38.4214	110.971	50.5241	50.9633	30.567	56.2893	123.44	502.21	102.345	874.671	849.43	490.419	6.61811	4.89077	8.64471	6.49461	6.78153	6.08997	9.49072	6.33393	9.53106	5.08239	P	P	P	M	P	P	P	P	P	P	noncoding	ENST00000548107	CTD-2314B22.3	GENCODE	617	chr14	-	19912754	19925311	TAAAGGGGGCTCTCTGGCCTTGAAATAGTGATGTTTTTTATACAGAAAGGAGAATGCAGA	intergenic
ASHGA5P018219	0.00423272	8.70263	2477.98	284.739	10.7266	8.30007	238.399	408.111	290.887	172.181	314.117	284.739	1492.48	996.322	5707.33	1486.17	2707.58	2477.98	10.1656	7.7878	9.63631	8.33365	12.3973	8.57177	10.2368	8.22427	11.1968	8.58287	P	P	P	P	P	P	P	P	P	P	noncoding	ENST00000450783	RP11-295G20.2	GENCODE	430	chr1	-	231658206	231664042	AGTGGATGGTGAACAAAGGAACAGTAAATGGAGTAACTTGGCTAGAATATGGCAGTAACT	bidirectional
ASHGA5P019560	0.0327661	8.59821	1279.3	148.787	9.35271	7.24319	104.79	290.683	144.602	95.0091	108.85	148.787	1532.15	3802.67	419.447	331.474	310.749	1279.3	10.203	6.50396	11.58	7.84972	8.76139	7.5873	8.13002	7.32019	8.08921	6.95477	P	P	P	P	P	P	P	P	P	P	noncoding	ENST00000492054	RP11-545G3.1	GENCODE	573	chr7	+	149737609	149773744	TTTGAACGTTCTACTTGGACACCTAAAACCCACAGTCCTCCAGAAAACACAAGGACAAAC	intergenic
ASHGA5P042691	0.00013929	8.42006	482.674	57.3244	8.57101	5.89017	46.8625	95.4251	44.6246	60.2492	39.4605	57.3244	203.63	680.93	550.957	626.78	351.074	482.674	7.34806	5.21948	9.08648	6.27344	9.12218	5.89964	9.02956	6.6102	8.26878	5.44807	P	P	P	P	P	P	P	P	P	P	noncoding	TCONS_00014547	XLOC_006924	LincRNAs identified by Cabili et al	1836	chr8	+	129000922	129004320	AAGAAAGGCCCAGGCATTTGCATCTATGTGTGCAGTTCTACTTGTCCTAAAGGCACTTCT	intergenic
ASHGA5P018565	0.0223163	8.41422	310.34	36.8828	7.72838	5.27867	42.734	28.3224	50.4977	33.3248	29.5352	36.8828	136.752	365.345	73.0048	398.597	578.003	310.34	6.76709	5.06632	8.19084	4.58479	6.31719	6.08929	8.39891	5.6199	8.96787	5.03307	P	P	P	P	P	P	P	P	P	P	noncoding	uc001vvv.1	AK056135	UCSC_knowngene	570	chr14	-	19919491	19925333	GGTCTCCGCGGTTCATCTGTGTTGCTCTAAATGACACTGTTTCATTATTTTGATGGCTGG	intergenic
ASHGA5P042485	0.0477457	8.36062	827.94	99.0286	8.75737	6.67395	76.7839	182.324	85.7558	66.753	83.5259	99.0286	203.665	1868.74	730.8	89.2845	1247.21	827.94	7.34829	6.0084	10.52	7.19667	9.52908	6.84081	6.32517	6.7724	10.0643	6.55146	P	P	M	P	P	P	P	P	P	P	noncoding	ENST00000420759	XXbac-BPG55C20.7	GENCODE	301	chr6	+	58291907	58298496	TGGTGCTAGCATATATAAGACTGAAACACCAAAGTCCTCCGTGGAAGTTAATGAATTTCT	intergenic
ASHGA5P029638	0.00138894	8.10765	438.136	54.0398	8.40999	5.83113	59.9677	65.9039	54.5575	32.5312	57.2388	54.0398	168.669	554.497	338.14	423.265	706.107	438.136	7.07466	5.62235	8.78678	5.77271	8.46278	6.20044	8.4763	5.57356	9.24944	5.98661	P	P	P	P	P	P	P	P	M	P	noncoding	ENST00000557691	RP6-65G23.3	GENCODE	629	chr14	+	71277046	71282120	CGAGATAGGAGGCCCATAATGTTTCTTCTTGCTTTAATCCTGTCGTGGCAACGTTGACTT	bidirectional
ASHGA5P029638	0.00138894	8.10765	438.136	54.0398	8.40999	5.83113	59.9677	65.9039	54.5575	32.5312	57.2388	54.0398	168.669	554.497	338.14	423.265	706.107	438.136	7.07466	5.62235	8.78678	5.77271	8.46278	6.20044	8.4763	5.57356	9.24944	5.98661	P	P	P	P	P	P	P	P	M	P	noncoding	ENST00000557691	RP6-65G23.3	GENCODE	629	chr14	+	71277046	71282120	CGAGATAGGAGGCCCATAATGTTTCTTCTTGCTTTAATCCTGTCGTGGCAACGTTGACTT	bidirectional
ASHGA5P028976	0.00581271	7.94345	1260.51	158.685	9.71279	7.30812	86.0596	304.447	180.147	126.977	95.7935	158.685	321.87	1716.52	495.659	2149.09	1619.39	1260.51	7.98556	6.18849	10.3971	7.92197	8.9888	7.89156	10.7652	7.77571	10.4273	6.76286	P	P	P	P	P	P	P	P	P	P	noncoding	uc001vvr.1	AK022914	UCSC_knowngene	4651	chr14	-	19880208	19925333	AAGAAAAACTACTTGCTGCCCTTACTTGAAGCTCAATTATTTAAAACAAAGAAAAAATAG	intergenic
ASHGA5P034812	0.00289369	7.92192	7739.77	977.006	12.5072	10.1605	884.384	1219.08	1010.12	848.967	922.479	977.006	12221	3067.34	9651.5	7095.56	6663.47	7739.77	13.2055	9.76743	11.2595	9.9311	13.1179	10.3368	12.4812	10.566	12.4719	10.2011	P	P	P	M	P	P	P	M	M	P	noncoding	uc021vcr.1	BC011243	UCSC_knowngene	964	chr19	+	58379176	58380140	TTGAACACACATGCTACCAAGCTCTGGGAAAACCCCATAGCTTTAAGAAGTACCTGCAAG	intergenic
ASHGA5P030807	0.00689332	7.72323	286.278	37.0672	7.5369	5.2487	38.703	57.3121	30.5808	33.639	25.1008	37.0672	81.7821	185.783	165.4	770.234	228.193	286.278	6.02549	4.90273	7.26159	5.57454	7.42874	5.32252	9.31698	5.6387	7.65171	4.80502	P	P	P	P	P	P	P	P	P	P	noncoding	ENST00000431060	RP11-66B24.2	GENCODE	3907	chr15	+	101390035	101404501	CTGAAAAATGAAGACGTTCCCACCAGTTCCAGAAAACAGGGCTAACTTAAAATGCAGCCC	intergenic
ASHGA5P034495	0.00577931	7.39375	536.048	72.5001	8.60731	6.31585	83.1104	78.2012	61.4788	58.4001	81.31	72.5001	187.294	862.068	292.218	438.443	900.216	536.048	7.22585	6.13337	9.42037	6.00863	8.24289	6.37026	8.52991	6.55546	9.61751	6.51154	P	P	P	P	P	P	P	P	P	P	noncoding	uc001amm.3	C1orf211	UCSC_knowngene	1260	chr1	+	6297870	6299502	CACTGTGCACCCAGCCCTCCATGCTTGGGGACAACACACCTACAAAAATATAAGAAAAAA	intergenic
ASHGA5P058281	0.000682861	6.91448	1021.15	147.683	9.36769	7.14036	64.085	274.703	147.091	68.653	183.883	147.683	212.289	1907.67	1173.12	424.377	1388.3	1021.15	7.40373	5.72982	10.5513	7.77226	10.1861	7.61071	8.4814	6.81815	10.2159	7.77084	P	P	P	P	P	P	P	P	P	P	noncoding	TCONS_00029159	XLOC_014103	LincRNAs identified by Cabili et al	1025	chr21	-	44808522	44809763	TAAACCGCCTGTTGTTGTCTAAACGTATATCCGTGTATGTAAACCGCCTGTTCTCTAAAC	intergenic
ASHGA5P014184	0.000728984	6.72458	357.915	53.2248	8.10536	5.7605	69.1349	74.0983	36.191	30.2371	56.4629	53.2248	588.765	413.667	124.824	272.285	390.033	357.915	8.85511	5.85403	8.36208	5.93824	7.04407	5.59715	7.84273	5.44656	8.4228	5.96651	P	P	P	P	P	P	P	P	P	P	noncoding	NR_033255	DTYMK	RefSeq	1136	chr2	-	242615156	242626383	TTTTTCTGCAAATCGCTGGGAACAAGTAATTTTTCCCTAGATTGGTGTAAACAGCCAGAC	exon sense-overlapping
ASHGA5P014184	0.000728984	6.72458	357.915	53.2248	8.10536	5.7605	69.1349	74.0983	36.191	30.2371	56.4629	53.2248	588.765	413.667	124.824	272.285	390.033	357.915	8.85511	5.85403	8.36208	5.93824	7.04407	5.59715	7.84273	5.44656	8.4228	5.96651	P	P	P	P	P	P	P	P	P	P	noncoding	NR_033255	DTYMK	RefSeq	1136	chr2	-	242615156	242626383	TTTTTCTGCAAATCGCTGGGAACAAGTAATTTTTCCCTAGATTGGTGTAAACAGCCAGAC	exon sense-overlapping
ASHGA5P015258	0.0209592	6.66655	776.538	116.483	9.09088	6.96971	124.052	160.655	126.306	105.406	65.9956	116.483	478.94	961.506	177.998	1230.5	1033.74	776.538	8.55735	6.77326	9.58655	7.0061	7.53016	7.3919	9.9772	7.47781	9.80315	6.19949	P	P	P	P	P	P	P	P	P	P	noncoding	uc001vvk.1	BX248778	UCSC_knowngene	1406	chr14	+	19650031	19684290	GTTTGAACAGGTTCAACAGTATGGCTCCAAAGGATGAAATTTCATTCTGATTTTCTGGCT	intergenic
ASHGA5P028010	0.0218252	6.63991	413.471	62.2706	8.14023	6.06997	71.1264	82.9824	54.2538	48.6393	54.3508	62.2705	506.407	634.366	69.7689	270.22	586.594	413.471	8.63597	5.89802	8.99085	6.09046	6.25424	6.19209	7.83089	6.2626	8.9892	5.90669	P	P	M	P	P	P	P	P	P	P	noncoding	NR_027358	LINC00592	RefSeq	1075	chr12	+	52604713	52617597	CCCCTTATACAAAACTTGGAGCTCAGACCACAAACAACAACAACAATCCAAAAAATAAAA	bidirectional
ASHGA5P049434	0.0322782	6.44415	1200.87	186.351	9.37063	7.44409	151.513	448.9	129.158	112.339	89.8423	186.351	259.897	3116.52	244.101	967.521	1416.31	1200.87	7.68842	7.09387	11.2893	8.46976	8.00159	7.42125	9.62755	7.57704	10.2463	6.65853	P	P	P	P	P	P	P	P	P	P	noncoding	ENST00000416689	RP5-848E13.3	GENCODE	3075	chr1	+	43424774	43442099	AAGCAGATGGTTAAGAGCTCTACAACTTCTGTGAGGTAAAGAATATCTGCAGGGCTGGAC	natural antisense
ASHGA5P045496	0.00201416	6.35086	54643.5	8604.12	15.4336	13.3062	7578.93	11856.2	6929.4	8000.53	8655.56	8604.12	36864.8	66324.8	25561.1	52572.4	91894.4	54643.5	14.7643	12.9437	15.8575	13.3258	14.5698	13.0754	15.4762	13.7753	16.5003	13.4109	P	P	P	P	P	P	P	P	P	P	noncoding	ENST00000428643	HMGA1P4	GENCODE	334	chr9	-	131425412	131425857	TTTGTCCCAGCCTGGGGCTCCCCCTCTGGTTTCCTATTTGTAGTTACTAGAATGAAAAAA	intergenic
ASHGA5P030757	0.0157082	6.22994	350.779	56.3054	8.10017	5.88036	66.4078	60.595	75.4844	50.8741	28.1657	56.3054	267.222	609.86	216.009	187.026	473.779	350.779	7.72311	5.78959	8.92389	5.65087	7.82666	6.65828	7.32979	6.33246	8.6974	4.97059	P	P	P	P	P	P	P	P	P	P	noncoding	uc021suk.1	AK054837	UCSC_knowngene	1692	chr15	+	91504656	91506348	GAGGGAAAGCAGCAGCAAGACCCAGTGGAGACGATGGCAAAGGGGCTGATTTCACTTTAG	exon sense-overlapping
ASHGA5P030757	0.0157082	6.22994	350.779	56.3054	8.10017	5.88036	66.4078	60.595	75.4844	50.8741	28.1657	56.3054	267.222	609.86	216.009	187.026	473.779	350.779	7.72311	5.78959	8.92389	5.65087	7.82666	6.65828	7.32979	6.33246	8.6974	4.97059	P	P	P	P	P	P	P	P	P	P	noncoding	uc021suk.1	AK054837	UCSC_knowngene	1692	chr15	+	91504656	91506348	GAGGGAAAGCAGCAGCAAGACCCAGTGGAGACGATGGCAAAGGGGCTGATTTCACTTTAG	exon sense-overlapping
ASHGA5P041905	0.00140133	6.22486	481.554	77.3598	8.62706	6.28562	65.6947	96.0307	124.925	40.2738	59.8747	77.3598	396.627	329.145	524.45	387.777	769.773	481.554	8.2812	5.76805	8.04991	6.28126	9.06281	7.37737	8.35993	5.94746	9.38143	6.05394	P	P	P	P	P	P	P	P	P	P	noncoding	NR_027005	C6orf147	RefSeq	1444	chr6	-	73983861	74020088	ACATTAGAATGAGGATGATTGCTGCAATGCTAACCAGCTAATAAATAGAAGTGGACTGGG	exon sense-overlapping
ASHGA5P034249	0.0122869	6.1752	565.179	91.524	8.5451	6.58341	104.12	115.611	43.4715	69.6144	124.804	91.524	919.818	443.264	188.417	176.643	1097.75	565.179	9.4941	6.49228	8.46471	6.5521	7.61884	5.86187	7.25569	6.83986	9.89217	7.17096	P	P	P	P	P	P	P	P	P	P	noncoding	uc002pda.1	AX746967	UCSC_knowngene	2995	chr19	-	46217644	46220639	TGCATTTTTCTGACTGAGGACACACAGCTTTAATAAATTCTCATTAAGCCCCACTACCTG	intron sense-overlapping
ASHGA5P038288	0.0182841	6.15432	339.927	55.2338	7.84028	5.88833	60.4082	61.8805	38.5275	45.4655	69.8874	55.2338	782.452	325.093	71.3139	235.744	285.03	339.927	9.27457	5.63259	8.03123	5.67918	6.28658	5.68816	7.64368	6.15547	7.96531	6.28623	P	P	P	P	P	P	P	P	P	P	noncoding	ENST00000469148	RP11-204J18.2	GENCODE	352	chr3	-	62246539	62248415	CTGATCTGTTGCCTCTGTTTCACTTTTCCAATTAGATGAATGACAGAAACAAAAAATCGT	intronic antisense
ASHGA5P049073	0.00473957	6.14911	214.183	34.8315	7.24934	5.09992	42.8191	53.0077	21.0102	24.6849	32.6358	34.8315	111.213	239.894	71.4567	164.691	483.659	214.183	6.46488	5.069	7.609	5.46833	6.28957	4.71095	7.15571	5.07497	8.7275	5.17637	P	P	P	P	P	P	P	P	P	P	noncoding	ENST00000570945	RP11-65J21.3	GENCODE	651	chr16	+	14396144	14420210	GTTATTCTGAGTGATTGCTTAATTTATTGAGCTGCGGCTGGATCTGTAATGAAATACAGC	intergenic
ASHGA5P046415	0.00315982	6.13185	1028.85	167.788	9.30671	7.05806	61.2395	387.112	245.127	48.8349	96.6259	167.788	158.391	1590.61	1911.73	1016.6	466.916	1028.85	6.98326	5.65428	10.2906	8.25986	10.8767	8.33196	9.70575	6.26932	8.67723	6.77491	P	P	M	P	P	P	P	P	P	P	noncoding	ENST00000399966	WASIR1	GENCODE	1054	chrX	-	155244287	155246502	GGCAGTGTATTTGTAATGGTACATAAAATGACGTCTGCTTTATAAGCATTCTCATTCCTA	intergenic
ASHGA5P039125	0.0330743	6.11063	355.067	58.1064	7.90013	5.86109	100.377	49.2741	53.9981	27.6602	59.2228	58.1064	194.503	456.076	75.3937	313.895	735.466	355.067	7.27792	6.43314	8.49923	5.3654	6.36104	6.18574	8.05513	5.28261	9.3073	6.03855	P	P	P	P	P	P	P	P	P	M	noncoding	ENST00000472924	KRT8P12	pseudogene	1397	chr3	+	160285639	160287036	TCAAGAAGGATGTGGATGAAACTTACATGAACAACGTAGAGCTGGAGTCTCACCTGGAAG
ASHGA5P029159	0.0351662	6.07453	305.954	50.3667	7.61801	5.49719	33.5412	114.12	40.1994	25.575	38.3978	50.3667	53.715	136.207	430.27	616.939	292.64	305.954	5.45756	4.65787	6.83016	6.53049	8.79337	5.75135	9.00403	5.1395	8.00496	5.40677	P	P	P	P	P	P	P	P	P	P	noncoding	ENST00000415338	RP5-998N21.4	GENCODE	3540	chr1	-	149372291	149379646	GTGGGAAATTGTAACATACCTCCATCAGATACTGTCGAACATTAGTAATGGTAGAAAATA	intergenic
ASHGA5P025824	0.0192945	6.05162	580.558	95.9342	8.48937	6.55038	58.6013	198.68	70.8606	58.9248	92.605	95.9342	374.683	1375.3	84.6751	470.739	597.395	580.558	8.19805	5.58521	10.0776	7.31968	6.51852	6.56955	8.63398	6.57	9.01871	6.70746	M	P	P	P	P	P	P	P	P	P	noncoding	NR_038279	LOC100506930	RefSeq	988	chr19	-	36803962	36822620	TGAGTATCTGATACCCCATCAGCCTGAGTCTCTTAAAGGCCTTTATACACATATGTCTAC	intergenic
ASHGA5P027905	0.00886821	6.0375	309.986	51.3434	7.849	5.76206	63.0085	72.4494	41.4754	44.6441	35.1397	51.3434	700.662	252.41	229.407	129.919	237.532	309.986	9.11317	5.70414	7.67426	5.90639	7.90377	5.79345	6.84195	6.12212	7.71186	5.28421	P	P	P	P	P	M	P	P	P	P	noncoding	ENST00000537555	RP11-551L14.6	GENCODE	348	chr12	+	31165436	31168601	TCTCTTCTATCCTGTCAGATAACCAAGGCACGGCCAACTGATCCTCCACCATCCGAGGAA	intergenic
ASHGA5P037696	0.00931123	6.03349	374.329	62.0419	8.05685	6.03014	61.8082	96.6531	52.0311	45.2342	54.4828	62.0419	513.201	594.834	115.675	495.218	152.719	374.329	8.65343	5.66981	8.88995	6.29204	6.94779	6.13295	8.70703	6.14598	7.08605	5.90992	P	P	P	M	P	P	P	M	M	P	noncoding	ENST00000444381	RP3-508I15.9	GENCODE	1325	chr22	-	39066472	39077825	GTCCCCCAAGTTATCATTTGCTTAATATGGAGCTACATATGTTGTGGAAAAGACATAAAA	natural antisense
ASHGA5P037696	0.00931123	6.03349	374.329	62.0419	8.05685	6.03014	61.8082	96.6531	52.0311	45.2342	54.4828	62.0419	513.201	594.834	115.675	495.218	152.719	374.329	8.65343	5.66981	8.88995	6.29204	6.94779	6.13295	8.70703	6.14598	7.08605	5.90992	P	P	P	M	P	P	P	M	M	P	noncoding	ENST00000444381	RP3-508I15.9	GENCODE	1325	chr22	-	39066472	39077825	GTCCCCCAAGTTATCATTTGCTTAATATGGAGCTACATATGTTGTGGAAAAGACATAAAA	natural antisense
ASHGA5P028972	0.0463265	5.97937	365.427	61.1146	7.79939	5.78621	42.9442	120.173	82.7064	37.6953	22.054	61.1146	67.7336	534.009	115.354	760.44	349.597	365.427	5.76232	5.0744	8.72966	6.60578	6.94395	6.79067	9.29945	5.83598	8.26158	4.62422	P	P	P	P	P	P	P	P	P	P	noncoding	uc001vvq.1	BC016035	UCSC_knowngene	1169	chr14	-	19856360	19925333	CATATATGCAACTATGACAGGAGGTACTAAAAGCCTTAGATAAGCATGGTGTATCTTTTT	intergenic
ASHGA5P037006	0.00161892	5.84184	323.114	55.3104	7.96421	5.8466	51.9902	89.3384	53.9317	44.6836	36.608	55.3104	394.2	395.17	220.61	489.148	116.443	323.114	8.27318	5.3898	8.30026	6.18979	7.85434	6.1847	8.68721	6.12379	6.70604	5.34492	M	P	P	P	P	P	P	P	P	P	noncoding	ENST00000565390	RP1-228H13.5	GENCODE	2446	chr1	+	40929990	40932436	CTATGGTCTTAGATTTCCCAAGAATTTGAATTTCTCCAATTGCTTATTTCCCTGAAAGAC	intergenic
ASHGA5P039529	0.0445539	5.80095	196.451	33.8653	6.78036	5.09493	33.409	43.3843	21.3467	28.3452	42.8411	33.8653	66.638	70.0916	148.517	62.4237	634.584	196.451	5.73913	4.65194	5.93952	5.19214	7.28123	4.738	5.83528	5.32678	9.10662	5.56578	P	P	P	P	P	P	P	P	P	P	noncoding	ENST00000504082	AC004069.2	GENCODE	549	chr4	-	106058436	106061776	ATTAGCAGCTGAAGAATGACTCAGATCATCAGTAGTGAATAAGAATGATTAGGGGGAAAT	intergenic
ASHGA5P048551	0.00449478	5.74833	1756.34	305.54	9.71648	7.90642	206.431	77.2794	570.828	598.141	75.0224	305.54	444.937	576.546	2398.03	5048.43	313.789	1756.34	8.45443	7.56849	8.83881	5.9921	11.1868	9.51551	11.9984	10.066	8.10401	6.39001	P	P	P	P	P	P	P	P	P	P	noncoding	ENST00000420153	AL928742.12	GENCODE	166	chr14	-	106066240	106066546	AGGAAGCTACCCCCAATAAACTGTGCCTGCTCAGAGCCCCAGGTACACCCATTCTTGGGA	intergenic
ASHGA5P040687	0.00507229	5.71028	2382.64	417.253	10.7801	8.81114	238.427	698.768	473.489	370.262	305.321	417.253	1000.91	1261.45	2638.98	3431	3580.84	2382.64	9.60073	7.78817	9.95273	9.10662	11.3171	9.272	11.429	9.34829	11.6008	8.54065	P	P	M	P	P	P	P	P	P	P	noncoding	TCONS_00022099	XLOC_010709	LincRNAs identified by Cabili et al	1083	chr13	-	100738208	100741196	ATTGTAAGGAAAATACCCCCAAGGAAGTTGAGGACACAGCAGACTTGGACTGTCTCCAAA	intergenic
ASHGA5P040094	0.0233371	5.67483	297.549	52.433	7.59545	5.57826	29.2869	116.791	48.9827	34.9754	32.1291	52.433	53.4391	143.506	395.177	615.496	280.126	297.549	5.45057	4.41577	6.90759	6.56827	8.67696	6.04429	9.00132	5.70769	7.9408	5.1553	P	P	P	P	P	P	P	P	P	P	noncoding	ENST00000457996	RP11-439A17.9	GENCODE	3543	chr1	+	120925633	120933000	GAGTGGGAAATTGTAACATACCTCCATCAGATACTGTTGAACATTAGTAATGGTAGAAAA	intronic antisense
ASHGA5P040094	0.0233371	5.67483	297.549	52.433	7.59545	5.57826	29.2869	116.791	48.9827	34.9754	32.1291	52.433	53.4391	143.506	395.177	615.496	280.126	297.549	5.45057	4.41577	6.90759	6.56827	8.67696	6.04429	9.00132	5.70769	7.9408	5.1553	P	P	P	P	P	P	P	P	P	P	noncoding	ENST00000457996	RP11-439A17.9	GENCODE	3543	chr1	+	120925633	120933000	GAGTGGGAAATTGTAACATACCTCCATCAGATACTGTTGAACATTAGTAATGGTAGAAAA	natural antisense
ASHGA5P040094	0.0233371	5.67483	297.549	52.433	7.59545	5.57826	29.2869	116.791	48.9827	34.9754	32.1291	52.433	53.4391	143.506	395.177	615.496	280.126	297.549	5.45057	4.41577	6.90759	6.56827	8.67696	6.04429	9.00132	5.70769	7.9408	5.1553	P	P	P	P	P	P	P	P	P	P	noncoding	ENST00000457996	RP11-439A17.9	GENCODE	3543	chr1	+	120925633	120933000	GAGTGGGAAATTGTAACATACCTCCATCAGATACTGTTGAACATTAGTAATGGTAGAAAA	natural antisense
ASHGA5P023097	0.0237537	5.6107	318.975	56.8513	7.63368	5.83553	98.641	32.0498	32.1267	48.358	73.081	56.8513	504.538	124.896	160.376	78.9347	726.132	318.975	8.63196	6.40508	6.70925	4.76418	7.38044	5.40279	6.1567	6.2531	9.29006	6.35248	P	P	P	P	P	P	P	P	P	P	noncoding	NR_027409	GOLGA8A	RefSeq	6526	chr15	-	34671269	34729667	CCCTGGCCAGGAATAATCGGTGGAGATGGATTGTGAAATGGAGGTGCATAAATATCCAGT	exon sense-overlapping
ASHGA5P037467	0.00717254	5.54971	248.701	44.8134	7.33724	5.20275	34.9548	106.403	27.7899	43.5592	11.3601	44.8134	90.8703	223.683	128.801	678.334	121.819	248.702	6.1755	4.72992	7.51432	6.43412	7.08653	5.16791	9.1456	6.0813	6.76426	3.6005	P	P	P	P	P	P	P	P	P	P	noncoding	ENST00000457157	AP000688.8	GENCODE	811	chr21	+	37377635	37379899	TATAAAAACTGTTCAGCGGTTCGCCAACAAGAAGTGGTAAAGTAGCAAAAATGGGGATGG	intergenic
ASHGA5P014827	0.022663	5.53918	1481.79	267.511	10.0994	8.21449	298.617	302.337	291.634	295.277	149.692	267.511	1044.03	2003.6	449.288	1923.45	1988.6	1481.79	9.66818	8.13086	10.6242	7.91009	8.84857	8.57524	10.6131	9.00713	10.7431	7.44913	P	P	P	P	P	P	P	P	P	P	noncoding	uc002zks.4	AK022914	UCSC_knowngene	2397	chr22	-	16150259	16193004	GTTTGAACAGGTCATTTACCATGCTGTCCTCCAGGTTCAACAGTATGGCTCCAAATGATG	intron sense-overlapping
ASHGA5P017430	0.0240787	5.4864	1435.48	261.644	10.0521	8.17633	289.258	298.089	305.969	270.878	144.023	261.644	1000.62	1916.56	438.724	1927.54	1893.96	1435.48	9.59983	8.0866	10.5569	7.88572	8.82007	8.63976	10.6154	8.87945	10.6682	7.39011	P	P	P	P	P	P	P	P	P	P	noncoding	ENST00000549484	AL589743.1	GENCODE	605	chr14	+	19650059	19656228	TGTTTGAACAGGTCATTTACCATGCTGTCCTCCAGGTTCAACAGTATGGCTCCAAAGGAT	intergenic
ASHGA5P030805	0.0176268	5.4722	798.014	145.831	8.95683	6.97619	85.1362	311.638	214.212	62.0603	56.1069	145.831	96.4958	1466.28	1065.09	788.746	573.457	798.014	6.25877	6.16848	10.1699	7.95652	10.0512	8.1401	9.34638	6.65974	8.95789	5.9561	P	P	P	P	P	P	P	P	P	P	noncoding	ENST00000558254	RP11-66B24.2	GENCODE	577	chr15	+	101389987	101396267	TAAAAGTGGGGCAACAGAAATTATTTCCTGTCCAGCGTCCTATTTCAAGGAACCTGGTGC	intergenic
ASHGA5P029178	0.0437047	5.45925	298.592	54.6947	7.5543	5.7455	40.9036	109.436	43.4832	41.2974	38.3538	54.6947	48.1017	130.771	451.584	591.964	270.54	298.592	5.30043	4.99197	6.7713	6.47593	8.85676	5.86234	8.95147	5.99171	7.89156	5.40557	P	P	M	P	P	P	P	M	P	P	noncoding	ENST00000428289	RP11-196G18.3	GENCODE	3543	chr1	-	149757214	149764576	GAGTGGGAAATTGTAACATACCTCCATCAGATACTGTCAAACATTAGTAATGGTAGAAAA	intron sense-overlapping
ASHGA5P029178	0.0437047	5.45925	298.592	54.6947	7.5543	5.7455	40.9036	109.436	43.4832	41.2974	38.3538	54.6947	48.1017	130.771	451.584	591.964	270.54	298.592	5.30043	4.99197	6.7713	6.47593	8.85676	5.86234	8.95147	5.99171	7.89156	5.40557	P	P	M	P	P	P	P	M	P	P	noncoding	ENST00000428289	RP11-196G18.3	GENCODE	3543	chr1	-	149757214	149764576	GAGTGGGAAATTGTAACATACCTCCATCAGATACTGTCAAACATTAGTAATGGTAGAAAA	natural antisense
ASHGA5P043694	0.0046819	5.32488	1432.88	269.093	9.84533	8.02784	201.22	624.505	118.478	200.16	201.1	269.093	401.938	2255.59	457.558	2745.12	1304.22	1432.88	8.30323	7.53108	10.8058	8.94658	8.87997	7.30514	11.1104	8.44231	10.1272	7.91411	P	P	P	P	P	P	P	P	P	P	noncoding	uc003ttf.3	BC053669	UCSC_knowngene	2761	chr7	+	64141510	64147264	ACGGGTTTCTGTTCCAACTGGTTGATCAACTTCTTGAGTCAACAAGTCCCAAAACCATGT	intron sense-overlapping
ASHGA5P043694	0.0046819	5.32488	1432.88	269.093	9.84533	8.02784	201.22	624.505	118.478	200.16	201.1	269.093	401.938	2255.59	457.558	2745.12	1304.22	1432.88	8.30323	7.53108	10.8058	8.94658	8.87997	7.30514	11.1104	8.44231	10.1272	7.91411	P	P	P	P	P	P	P	P	P	P	noncoding	uc003ttf.3	BC053669	UCSC_knowngene	2761	chr7	+	64141510	64147264	ACGGGTTTCTGTTCCAACTGGTTGATCAACTTCTTGAGTCAACAAGTCCCAAAACCATGT	intron sense-overlapping
ASHGA5P033230	0.0156098	5.31943	299.432	56.2902	7.71652	5.87204	67.8259	81.1949	53.0135	34.1971	45.2197	56.2902	152.533	162.616	732.877	144.496	304.637	299.432	6.92896	5.82196	7.07668	6.0596	9.53312	6.16018	6.98155	5.66862	8.06229	5.64983	P	P	P	P	P	P	M	P	P	P	noncoding	ENST00000425412	RP11-295G20.2	GENCODE	392	chr1	-	231662851	231664247	CTACTCTGATTAGAAATGACTTGACCATGCCAAAAAGAATAAAAGACAGCTCTGATACAA	bidirectional
ASHGA5P016188	0.0195251	5.28898	344.04	65.0484	7.86647	6.09349	39.7493	89.4296	76.5874	63.3063	56.1693	65.0484	109.978	611.91	102.622	486.478	409.211	344.04	6.44699	4.94673	8.93104	6.19136	6.78511	6.67993	8.67901	6.69094	8.4902	5.95847	P	P	P	P	P	P	P	P	P	P	noncoding	ENST00000548271	AL589743.1	GENCODE	412	chr14	+	19653907	19683250	ATCCCTGCAGCTGTGTTTGAACAGGAAAGAAAAAAGAAGAAAACAAACCTCCATACGAGA	intergenic
ASHGA5P046935	0.0179023	5.28579	2020.61	382.273	10.5725	8.69503	482.759	584.06	353.684	269.14	221.723	382.273	1123.1	2962.29	1722.74	1002.91	3292.03	2020.61	9.7686	8.85049	11.21	8.84542	10.7169	8.85068	9.68353	8.87155	11.4836	8.05703	P	P	P	P	P	P	P	P	P	P	noncoding	uc001jtm.3	BC069792	UCSC_knowngene	632	chr10	-	74884658	74885290	GAACAACTCACAGAAAAATGCCAATCTCTTTACAGCTCACGTAATTTAAATGGTTACTGT	natural antisense
ASHGA5P013053	0.0368742	5.25997	831.368	158.056	9.24952	7.44099	189.159	167.988	175.877	167.163	90.0911	158.056	617.992	1238.25	228.981	880.004	1191.62	831.368	8.9256	7.43738	9.92057	7.06686	7.9008	7.85842	9.50055	8.17939	10.0001	6.66287	P	P	P	P	P	P	P	P	P	P	noncoding	ENST00000383038	AP000525.8	GENCODE	1394	chr22	-	16158797	16192995	GTTTGAACAGGTTCAACAGTATGGCTCCAAATGATGAAATTTCATTCTGATTTTCTGGCT	intergenic
ASHGA5P016583	0.00309751	5.20277	147.5	28.3502	6.87253	4.79012	27.0241	40.4106	35.6569	24.9219	13.7377	28.3502	204.025	192.065	93.3984	191.536	56.4751	147.5	7.35088	4.2791	7.30095	5.09395	6.65365	5.5752	7.36489	5.08982	5.69227	3.91252	P	P	P	M	P	P	P	P	P	P	noncoding	ENST00000431924	RP3-508I15.9	GENCODE	541	chr22	-	39063834	39077775	CGGGTATAGGGTTCTTGGATAAACAAGCTCTGACGATCATTCCCAAACAAGAGTTCAAAA	natural antisense
ASHGA5P016583	0.00309751	5.20277	147.5	28.3502	6.87253	4.79012	27.0241	40.4106	35.6569	24.9219	13.7377	28.3502	204.025	192.065	93.3984	191.536	56.4751	147.5	7.35088	4.2791	7.30095	5.09395	6.65365	5.5752	7.36489	5.08982	5.69227	3.91252	P	P	P	M	P	P	P	P	P	P	noncoding	ENST00000431924	RP3-508I15.9	GENCODE	541	chr22	-	39063834	39077775	CGGGTATAGGGTTCTTGGATAAACAAGCTCTGACGATCATTCCCAAACAAGAGTTCAAAA	natural antisense
ASHGA5P030748	0.0258276	5.18175	5890.09	1136.7	11.9362	10.2964	1117.61	1904.28	947.706	546.335	1167.56	1136.7	2561.82	12315.1	1750.03	8159.8	4663.74	5890.09	10.9697	10.1464	13.319	10.5872	10.7358	10.2558	12.6877	9.9356	11.9689	10.5569	P	P	P	P	P	P	P	M	P	P	noncoding	ENST00000579581	RP11-697E2.7	pseudogene	588	chr15	+	90818360	90818948	TGGTAATTTACCCCGTGAAGTACACTCAACCTTCAACCTTCATGCCAAGCCCCGCTGTCA
ASHGA5P039084	0.0165647	5.17988	832.838	160.783	8.90621	7.09935	111.219	442.104	74.5917	76.6944	99.3076	160.783	729.368	2158.6	101.687	446.285	728.255	832.838	9.17372	6.60218	10.7386	8.44451	6.77097	6.64223	8.55331	6.99039	9.29443	6.81746	P	P	P	P	P	P	P	P	P	P	noncoding	NR_036538	LOC646903	RefSeq	1964	chr3	+	149689065	149691029	ATTCAAAGAGAGTCCATGTGCTGTCTTGGTTTTCAGTACTGTAATAAAGTAACCTGTGCT	intronic antisense
ASHGA5P039084	0.0165647	5.17988	832.838	160.783	8.90621	7.09935	111.219	442.104	74.5917	76.6944	99.3076	160.783	729.368	2158.6	101.687	446.285	728.255	832.838	9.17372	6.60218	10.7386	8.44451	6.77097	6.64223	8.55331	6.99039	9.29443	6.81746	P	P	P	P	P	P	P	P	P	P	noncoding	NR_036538	LOC646903	RefSeq	1964	chr3	+	149689065	149691029	ATTCAAAGAGAGTCCATGTGCTGTCTTGGTTTTCAGTACTGTAATAAAGTAACCTGTGCT	intronic antisense
ASHGA5P036482	0.0171162	5.15384	220.28	42.7409	7.11696	5.39264	48.6357	66.4357	32.9791	49.4726	16.1816	42.741	94.4987	375.587	336.731	263.718	30.8663	220.28	6.22941	5.28131	8.2286	5.78443	8.45621	5.44572	7.79967	6.2897	4.87091	4.16203	P	P	P	P	P	P	P	P	P	P	noncoding	ENST00000439237	AC010980.2	GENCODE	343	chr2	+	223185824	223186257	AAGAAAAGATGACTTTGGAATGTTCTGGATTCCCACAGCTGGGAATGTTCCTACTTTTTT	intergenic
ASHGA5P022359	0.00243308	5.10981	1992.57	389.95	10.6156	8.75618	388.725	558.178	450.842	299.16	252.848	389.95	1202.26	2178.14	3205.23	1399.97	1977.26	1992.57	9.86558	8.52197	10.7554	8.77941	11.5786	9.19743	10.1456	9.03033	10.7329	8.25174	P	P	P	P	P	P	P	P	P	P	noncoding	ENST00000555186	CHEK2P2	GENCODE	864	chr15	+	20487996	20496811	GGCAGAATAGATTACTGATTTTGGGCACTCCAAGATTTTGGGAGAGACCTCTCTCATGAG	intergenic
ASHGA5P049520	0.021454	5.09981	776.384	152.238	9.16429	7.41037	202.094	174.38	102.655	134.086	147.974	152.238	718.036	434.19	839.423	331.833	1558.44	776.384	9.15132	7.53555	8.43286	7.12701	9.733	7.10083	8.1336	7.85656	10.3707	7.43189	P	P	P	P	P	P	P	P	P	P	noncoding	NR_045024	C17orf76-AS1	RefSeq	642	chr17	+	16342300	16344525	CCAAGAGAAGGTAAGCCTTGAGCTGGCCAATGATCCCTTCAACCCCATAGTGGAATGAAT	intergenic
ASHGA5P029400	0.00191352	5.04174	229.574	45.5347	7.47482	5.61296	56.4528	46.4847	43.9825	51.2375	29.516	45.5347	171.523	240.955	316.82	342.947	75.6247	229.574	7.09944	5.52577	7.61521	5.28868	8.36653	5.87485	8.18664	6.3436	6.1063	5.03191	P	P	P	P	P	P	P	P	P	P	noncoding	ENST00000547821	RP11-496I2.4	pseudogene	586	chr14	+	19758196	19758782	TATTTGCATGCCTGCAGGAGGTGCTGGAGAGCAAGAAAAGGAGCCTGTGAGCAGGGGTTC
ASHGA5P046341	0.00787952	5.03226	210.086	41.7478	7.1575	5.46809	49.0988	40.8868	25.9284	50.0273	42.7979	41.7478	242.825	95.1957	44.6544	426.377	241.377	210.086	7.59931	5.29353	6.34802	5.11072	5.61468	5.06211	8.4886	6.30952	7.73689	5.56457	P	P	P	P	P	P	P	P	P	P	noncoding	ENST00000457876	AC004383.4	GENCODE	646	chrX	-	133678455	133679768	AAAGTCCTGGGCACTGTTGCTCATGAGTGCTGCACAACTGTCGCCCTCTAAAGCCACCTC	intergenic
ASHGA5P048553	0.00174287	5.02085	1915.8	381.57	10.5575	8.72549	393.41	537.416	443.723	276.469	256.83	381.57	1191.14	1994.14	3185.89	1389.92	1817.93	1915.8	9.85036	8.54131	10.6154	8.72854	11.5721	9.1734	10.1359	8.90546	10.6139	8.27875	P	P	P	P	P	P	P	P	P	P	noncoding	ENST00000566448	CHEK2P2	GENCODE	670	chr15	+	20488734	20496839	TGAATTTTAGATTACTGATTTTGGGCACTCCAAGATTTTGGGAGAGACCTCTCTCATGAG	intergenic
ASHGA5P035993	0.0426538	5.01833	2576.04	513.326	10.6447	8.45214	241.289	216.524	1323.58	54.5615	730.675	513.326	3430.38	4308.32	3186.69	310.521	1644.27	2576.04	11.3898	7.80794	11.7697	7.43945	11.573	10.7072	8.04057	6.45276	10.4505	9.85329	P	P	P	P	P	P	P	P	P	P	noncoding	uc002stn.1	IGVK-A2	UCSC_knowngene	301	chr2	+	89986779	89987080	TCTAGTCAGAGCCTCCTGCATAGTGATGGAAAGACCTATTTGTATTGGTACCTGCAGAAG	intergenic
ASHGA5P032882	0.0270321	4.97686	965.018	193.901	9.45211	7.75917	287.652	193.338	127.31	164.966	196.238	193.901	803.172	573.331	1058.06	374.786	2015.74	965.018	9.31609	8.07732	8.82942	7.28006	10.0385	7.40422	8.31065	8.16028	10.7659	7.87397	P	P	P	P	P	P	P	P	P	P	noncoding	NR_027179	C17orf76-AS1	RefSeq	376	chr17	+	16342300	16344525	GTAAGCCTTGAGCTGGCCAATGATCCCTTCAACCCCATAGTGGAATGAATAAACAGCTGA	intergenic
ASHGA5P039618	0.00354329	4.95934	11509.6	2320.79	13.1319	11.3855	2222.02	3497.79	2158.27	1654.8	2071.08	2320.79	19628.9	8164.75	9116.71	13280.5	7357.06	11509.6	13.9275	11.1353	12.7164	11.4828	13.0454	11.3969	13.3448	11.5411	12.6255	11.3715	P	P	M	P	P	P	P	P	P	P	noncoding	ENST00000514727	PPP1R14BP3	pseudogene	442	chr4	-	140036086	140036528	ATTTCTGGTCTGCTGGACAAGATCCGGGGCATGCAGAAGCTGAGCACACCCCAGAAGAAG
ASHGA5P051743	0.0324812	4.92163	230.765	46.8879	7.24566	5.59659	48.2533	75.3228	32.345	38.2262	40.2921	46.8879	121.854	310.091	37.6186	242.373	441.887	230.765	6.59787	5.26875	7.96111	5.9607	5.38103	5.41358	7.68473	5.86311	8.60354	5.4768	P	P	P	P	P	P	P	P	P	P	noncoding	ENST00000455295	RP11-277L2.2	GENCODE	390	chr1	+	149576471	149591238	CTCTCTGAAGCTGTAGAGGAGGCTCAAGAATCAGAACAACCTGAAGTTCTTTAAGCTGTC	intergenic
ASHGA5P053406	0.0106827	4.85149	1624.57	334.86	10.2818	8.43763	517.053	483.37	317.615	194.669	161.594	334.86	1858.39	979.876	2759.5	828.072	1697.03	1624.57	10.4924	8.9507	9.61815	8.57887	11.3802	8.68759	9.4151	8.40083	10.5033	7.57015	P	P	P	P	P	P	M	P	P	P	noncoding	ENST00000442067	GAS5	GENCODE	1114	chr1	-	173833768	173836181	TGAAACAGTAGTTGGGAAATCTTTTAGAAATCCACCTATTACTACCTATTGGTAAAGGAG	intergenic
ASHGA5P049521	0.0228106	4.85125	1071.55	220.882	9.6226	7.94165	318.624	236.53	134.281	179.863	235.111	220.882	1044.05	624.043	1151.29	425.576	2112.81	1071.55	9.66859	8.22633	8.96246	7.56232	10.1621	7.4815	8.48543	8.29283	10.8344	8.14528	P	P	P	P	P	P	P	P	P	P	noncoding	NR_045026	C17orf76-AS1	RefSeq	552	chr17	+	16342300	16344525	ATGATCCCTTCAACCCCATAGTGGAATGAATAAACAGCTGATCTTGTTAAAACTCGCTTC	intergenic
ASHGA5P035236	0.0125145	4.80755	2884.16	599.922	10.8174	9.21815	1308.8	290.418	352.31	333.941	714.147	599.922	6447.83	799.527	2896.47	898.081	3378.89	2884.16	12.2571	10.3813	9.31358	7.84865	11.4609	8.84331	9.5287	9.19694	11.5267	9.82059	P	P	P	P	P	P	M	P	P	P	noncoding	NR_015395	LOC541471	RefSeq	809	chr2	-	112124590	112252692	TTATAAATCTTCAATACATCCTGTCCCCCTAAAACGGCATCTGGGTCTTTTGAGGGTTAA	intergenic
ASHGA5P031297	0.0071122	4.74005	1307.43	275.826	9.99132	8.21423	411.224	345.148	287.288	176.619	158.849	275.826	1498.25	825.02	2093.74	683.787	1436.34	1307.43	10.1703	8.6022	9.35564	8.10246	11.0097	8.55482	9.1579	8.26827	10.2631	7.54341	P	P	P	P	P	P	P	P	P	P	noncoding	ENST00000436656	GAS5	GENCODE	822	chr1	-	173833038	173837127	GAAATCTTTTAGAAATCCACCTATTACTACCTATTGGTAAAGGAGATTAAATTTCTACAG	bidirectional
ASHGA5P031297	0.0071122	4.74005	1307.43	275.826	9.99132	8.21423	411.224	345.148	287.288	176.619	158.849	275.826	1498.25	825.02	2093.74	683.787	1436.34	1307.43	10.1703	8.6022	9.35564	8.10246	11.0097	8.55482	9.1579	8.26827	10.2631	7.54341	P	P	P	P	P	P	P	P	P	P	noncoding	ENST00000436656	GAS5	GENCODE	822	chr1	-	173833038	173837127	GAAATCTTTTAGAAATCCACCTATTACTACCTATTGGTAAAGGAGATTAAATTTCTACAG	bidirectional
ASHGA5P025926	0.000909319	4.70807	523.263	111.142	8.78328	6.91497	102.752	163.402	108.566	80.4026	100.586	111.142	553.093	415.962	624.614	406.652	615.992	523.263	8.75694	6.47363	8.37364	7.02818	9.29504	7.17457	8.42605	7.06378	9.06471	6.83469	P	P	P	P	P	P	P	P	P	P	noncoding	NR_046402	POLD1	RefSeq	3361	chr19	+	50887579	50921275	TGGCCGAGAGGACCCGCTGTTCGTGCTGGAGCACAGCCTGCCCATTGACACGCAGTACTA	exon sense-overlapping
ASHGA5P025926	0.000909319	4.70807	523.263	111.142	8.78328	6.91497	102.752	163.402	108.566	80.4026	100.586	111.142	553.093	415.962	624.614	406.652	615.992	523.263	8.75694	6.47363	8.37364	7.02818	9.29504	7.17457	8.42605	7.06378	9.06471	6.83469	P	P	P	P	P	P	P	P	P	P	noncoding	NR_046402	POLD1	RefSeq	3361	chr19	+	50887579	50921275	TGGCCGAGAGGACCCGCTGTTCGTGCTGGAGCACAGCCTGCCCATTGACACGCAGTACTA	exon sense-overlapping
ASHGA5P033430	0.0105062	4.68578	1012.76	216.135	9.56528	7.89003	149.925	335.981	229.373	172.251	193.143	216.135	805.505	2185.92	477.943	731.562	862.866	1012.76	9.31883	7.07706	10.7586	8.06521	8.94071	8.23751	9.25113	8.22455	9.55711	7.84584	P	P	P	P	P	P	P	P	P	P	noncoding	ENST00000582106	MAFG-AS1	GENCODE	1895	chr17	+	79885704	79888629	AAGCTGAGCCAAGCAGAGGCGGGCAGCTCCTCCTCCAGGGCCCACCTGGCCTGCTGGGGA	bidirectional
ASHGA5P000098	0.0380602	4.64126	526.544	113.448	8.3959	6.86897	103.519	195.146	117.363	59.8927	91.3218	113.448	459.647	1299.04	156.154	176.03	541.843	526.544	8.50737	6.4833	9.99638	7.29232	7.34354	7.28816	7.25022	6.59817	8.88198	6.68289	P	P	P	M	P	P	P	P	P	P	noncoding	BC042589		RNAdb	3223	chr6	+	26172304	26175512	GCAGCATTTGGGTGGAAGGACGTAGAAAATATTTTTTAACTGCCTACCTTATTTTCATAA	intergenic
ASHGA5P028900	0.0312317	4.60993	286.935	62.2428	7.79697	5.96524	101.398	88.9745	38.7987	43.5602	38.4827	62.2428	162.806	304.56	425.344	116.28	425.685	286.935	7.02474	6.44954	7.93434	6.18417	8.779	5.70018	6.69594	6.08149	8.55084	5.41083	P	P	P	P	P	P	P	P	P	P	noncoding	NR_027350	MIR17HG	RefSeq	5018	chr13	+	92000073	92006829	GGAAAGAAAGCACTTAACATTTTAGGAATTCTTTTTAAAGCTGCTTGCAAAGTGTTGGTG	intergenic
ASHGA5P026007	0.00943856	4.55993	207.755	45.5609	7.35969	5.58266	45.1063	49.5254	32.8429	37.2624	63.0677	45.5609	377.293	235.189	90.2193	176.658	159.413	207.755	8.21167	5.15655	7.578	5.37173	6.60578	5.43911	7.25645	5.81578	7.14656	6.13013	P	P	P	P	P	P	P	P	P	P	noncoding	NR_052852	MARCKSL1	RefSeq	1337	chr1	-	32799429	32801840	CGGAGCGGAGGAGAATGGCCACGTGAAAAGCAATGGAGACTTATCCCCCAAGGGTGAAGG	exon sense-overlapping
ASHGA5P023157	0.00703931	4.52661	124.748	27.5587	6.62993	4.82743	29.6664	33.3646	28.2505	24.0639	22.4483	27.5587	55.8059	115.771	83.6899	122.208	246.264	124.748	5.50967	4.43769	6.6067	4.81917	6.50526	5.1985	6.76426	5.03387	7.76376	4.64793	P	P	P	P	P	P	P	P	P	P	noncoding	ENST00000571639	RP11-65J21.3	GENCODE	305	chr16	+	14396361	14420142	GGCAGCGGCGATAAACCTGCCAGTAATTTCAGCAAATGAAACGTGGAACACGTCAAGGCC	intergenic
ASHGA5P014668	0.0209195	4.52659	2933.46	648.052	11.123	9.4346	608.864	997.064	896.731	406.616	330.984	648.052	1372.56	4781.88	1798.99	2756.76	3957.12	2933.46	10.0453	9.20097	11.9291	9.62798	10.7854	10.1791	11.116	9.49667	11.7392	8.66827	P	P	P	P	P	P	P	P	P	P	noncoding	ENST00000412301	AC129778.2	GENCODE	476	chr9	-	42853719	42857852	TGGATGGTGGCTTCCAATTGTGGACAAGATAAGGACCATTGCCCAGGCTGTCTATGGAGC	intergenic
ASHGA5P055949	0.0420981	4.47591	403.162	90.0737	8.03504	6.56746	93.1943	147.807	65.9866	60.9404	82.44	90.0737	239.727	309.906	99.0392	318.294	1048.84	403.162	7.58236	6.31738	7.95834	6.89122	6.7364	6.4664	8.07412	6.62911	9.82395	6.53317	P	P	P	P	P	P	M	P	P	P	noncoding	ENST00000550043	BNIP3P1	GENCODE	1585	chr14	+	28733595	28735180	CTCGGGCGCCATGTCGCAGAACGGAGCGCCCGGGATGCAGGAGGAGAGCCTGCAGGGCTC	intergenic
ASHGA5P045028	0.0477584	4.46571	1360.84	304.732	9.98113	8.4262	269.622	360.746	367.469	314.982	210.841	304.732	733.628	2041.23	1345.23	542.474	2141.66	1360.84	9.18153	7.9746	10.6545	8.16412	10.3813	8.90872	8.83405	9.10392	10.8543	7.97966	P	P	P	P	P	P	P	P	P	P	noncoding	ENST00000520913	PVT1	GENCODE	584	chr8	+	128902891	128944941	AGACATGGTACCTGATGGACACCAAGCTACGTACAGCTTCAAGGCCCCTTCTTTCTTTGC	intergenic
ASHGA5P044744	0.00674003	4.43603	568.136	128.073	8.71152	7.06169	123.754	174.815	81.6261	67.6874	192.483	128.073	721.443	866.017	164.246	361.86	727.113	568.136	9.1614	6.76915	9.42527	7.13009	7.41594	6.77154	8.26237	6.7961	9.29261	7.84159	P	P	P	P	P	P	P	P	P	P	noncoding	ENST00000518096	TUBBP1	GENCODE	1646	chr8	+	30209388	30211034	CGCTGCTCCAGCATCTAGGGCATATTCCAACCTTCCAGCCTGCGACCTGCAGAGAAAAAA	intergenic
ASHGA5P018891	0.00472577	4.39333	35679.3	8121.24	14.7742	13.2137	8272.66	12109	6883.35	5916.13	7425.09	8121.24	49772.2	42049	17363.3	26212.9	42999.3	35679.3	15.2159	13.0799	15.1946	13.354	13.9417	13.0635	14.3242	13.4057	15.1946	13.1656	P	P	M	P	P	P	P	P	P	P	noncoding	NR_029466	COX7A2	RefSeq	761	chr6	-	75947390	75953644	TTACCAAAAGGAGGATGATGAAATTCCACTGTATCTAAAGGGTGGGGTAGCTGATGCCCT	exon sense-overlapping
ASHGA5P028688	0.0281707	4.32145	320.814	74.2377	7.72872	6.2442	83.2641	128.296	39.5957	62.4352	57.5977	74.2376	188.311	591.447	49.7769	346.331	428.204	320.814	7.23441	6.13637	8.87997	6.69254	5.76907	5.72816	8.20237	6.66878	8.55781	5.99513	M	P	P	P	P	P	P	P	P	P	noncoding	ENST00000412194	BX248398.1	GENCODE	373	chr1	-	144325838	144336254	CCCGTTCTACTTTTTCAGCTTGTTGCCTGTAATATGTGAATGGAAATAAAATAATCAAGC	intergenic
ASHGA5P025823	0.0176232	4.30017	250.028	58.1437	7.53792	5.91362	67.8521	82.8136	51.1787	32.8908	55.9832	58.1437	310.42	404.752	62.2082	197.981	274.778	250.028	7.93844	5.82271	8.33328	6.08765	6.08824	6.10708	7.41336	5.59767	7.91627	5.95298	P	P	M	P	P	P	P	P	P	P	noncoding	NR_038278	LOC100506930	RefSeq	1749	chr19	-	36810617	36822620	CAGATTAAAGGTACGACATTTGGAGGCCCCAGCGAGAAACGTCACCGGGAGAAACGTCAC	intergenic
ASHGA5P027536	0.000337983	4.26047	729.042	171.118	9.1458	7.5292	276.289	203.248	99.6328	145.227	131.192	171.118	1107.41	483.723	328.93	1001.87	723.273	729.042	9.74651	8.01265	8.59117	7.35158	8.42527	7.06023	9.68227	7.972	9.28379	7.24958	P	P	P	P	P	P	P	P	P	P	noncoding	ENST00000550029	RP11-341G23.4	GENCODE	738	chr12	-	104157089	104162636	GCCTCTGGGAGCTTTTCCTTTTTTAACAGTACTTTGTTGAGAGATGATTCACATATAATA	natural antisense
ASHGA5P053562	0.00795839	4.25988	199.184	46.7582	7.327	5.63523	59.0157	49.9346	51.2302	32.8216	40.7889	46.7582	131.537	336.973	148.011	118.769	260.632	199.184	6.70925	5.59767	8.08225	5.38495	7.27616	6.10883	6.72493	5.5927	7.84243	5.49198	P	P	M	P	P	P	P	M	P	P	noncoding	uc003ysl.3	PVT1	UCSC_knowngene	1738	chr8	+	128902834	129113499	AAAGATGCCCCTCAAGATGGCTGTGCCTGTCAGCTGCATGGAGCTTCGTTCAAGTATTTT	intronic antisense
ASHGA5P053402	0.020963	4.25304	3123.8	734.486	11.2077	9.55874	1204.18	1081.53	696.12	331.427	359.171	734.485	3583.88	1612.8	4715.39	1583.84	4123.08	3123.8	11.4427	10.261	10.3104	9.75116	12.1625	9.79787	10.3318	9.18834	11.791	8.79533	P	P	P	P	P	P	P	P	P	P	noncoding	uc001gjk.3	GAS5	UCSC_knowngene	1696	chr1	-	173833038	173837125	TTTTAAGTGTTGTAAAGCCGATACAATGATGATAACATAGTTCAGCAGACTAACGCTGAT	bidirectional
ASHGA5P053402	0.020963	4.25304	3123.8	734.486	11.2077	9.55874	1204.18	1081.53	696.12	331.427	359.171	734.485	3583.88	1612.8	4715.39	1583.84	4123.08	3123.8	11.4427	10.261	10.3104	9.75116	12.1625	9.79787	10.3318	9.18834	11.791	8.79533	P	P	P	P	P	P	P	P	P	P	noncoding	uc001gjk.3	GAS5	UCSC_knowngene	1696	chr1	-	173833038	173837125	TTTTAAGTGTTGTAAAGCCGATACAATGATGATAACATAGTTCAGCAGACTAACGCTGAT	bidirectional
ASHGA5P025888	0.00891639	4.24891	335.238	78.8997	8.13876	6.37102	90.9255	117.468	78.4406	65.6334	42.0315	78.8997	340.071	268.718	229.853	355.744	481.804	335.238	8.06488	6.27887	7.7613	6.57567	7.90574	6.71475	8.23859	6.74851	8.72332	5.53733	P	P	P	P	P	P	P	P	P	P	noncoding	NR_045670	PSMC3IP	RefSeq	1379	chr17	-	40724327	40729849	GTTTGACATGAGCTCAAGGAATTATCTAGTGCCCTGACCACACCAGAGATGCAGAAAGAA	exon sense-overlapping
ASHGA5P025888	0.00891639	4.24891	335.238	78.8997	8.13876	6.37102	90.9255	117.468	78.4406	65.6334	42.0315	78.8997	340.071	268.718	229.853	355.744	481.804	335.238	8.06488	6.27887	7.7613	6.57567	7.90574	6.71475	8.23859	6.74851	8.72332	5.53733	P	P	P	P	P	P	P	P	P	P	noncoding	NR_045670	PSMC3IP	RefSeq	1379	chr17	-	40724327	40729849	GTTTGACATGAGCTCAAGGAATTATCTAGTGCCCTGACCACACCAGAGATGCAGAAAGAA	exon sense-overlapping
ASHGA5P025888	0.00891639	4.24891	335.238	78.8997	8.13876	6.37102	90.9255	117.468	78.4406	65.6334	42.0315	78.8997	340.071	268.718	229.853	355.744	481.804	335.238	8.06488	6.27887	7.7613	6.57567	7.90574	6.71475	8.23859	6.74851	8.72332	5.53733	P	P	P	P	P	P	P	P	P	P	noncoding	NR_045670	PSMC3IP	RefSeq	1379	chr17	-	40724327	40729849	GTTTGACATGAGCTCAAGGAATTATCTAGTGCCCTGACCACACCAGAGATGCAGAAAGAA	exon sense-overlapping
ASHGA5P025888	0.00891639	4.24891	335.238	78.8997	8.13876	6.37102	90.9255	117.468	78.4406	65.6334	42.0315	78.8997	340.071	268.718	229.853	355.744	481.804	335.238	8.06488	6.27887	7.7613	6.57567	7.90574	6.71475	8.23859	6.74851	8.72332	5.53733	P	P	P	P	P	P	P	P	P	P	noncoding	NR_045670	PSMC3IP	RefSeq	1379	chr17	-	40724327	40729849	GTTTGACATGAGCTCAAGGAATTATCTAGTGCCCTGACCACACCAGAGATGCAGAAAGAA	exon sense-overlapping
ASHGA5P025888	0.00891639	4.24891	335.238	78.8997	8.13876	6.37102	90.9255	117.468	78.4406	65.6334	42.0315	78.8997	340.071	268.718	229.853	355.744	481.804	335.238	8.06488	6.27887	7.7613	6.57567	7.90574	6.71475	8.23859	6.74851	8.72332	5.53733	P	P	P	P	P	P	P	P	P	P	noncoding	NR_045670	PSMC3IP	RefSeq	1379	chr17	-	40724327	40729849	GTTTGACATGAGCTCAAGGAATTATCTAGTGCCCTGACCACACCAGAGATGCAGAAAGAA	exon sense-overlapping
ASHGA5P025888	0.00891639	4.24891	335.238	78.8997	8.13876	6.37102	90.9255	117.468	78.4406	65.6334	42.0315	78.8997	340.071	268.718	229.853	355.744	481.804	335.238	8.06488	6.27887	7.7613	6.57567	7.90574	6.71475	8.23859	6.74851	8.72332	5.53733	P	P	P	P	P	P	P	P	P	P	noncoding	NR_045670	PSMC3IP	RefSeq	1379	chr17	-	40724327	40729849	GTTTGACATGAGCTCAAGGAATTATCTAGTGCCCTGACCACACCAGAGATGCAGAAAGAA	natural antisense
ASHGA5P025888	0.00891639	4.24891	335.238	78.8997	8.13876	6.37102	90.9255	117.468	78.4406	65.6334	42.0315	78.8997	340.071	268.718	229.853	355.744	481.804	335.238	8.06488	6.27887	7.7613	6.57567	7.90574	6.71475	8.23859	6.74851	8.72332	5.53733	P	P	P	P	P	P	P	P	P	P	noncoding	NR_045670	PSMC3IP	RefSeq	1379	chr17	-	40724327	40729849	GTTTGACATGAGCTCAAGGAATTATCTAGTGCCCTGACCACACCAGAGATGCAGAAAGAA	natural antisense
ASHGA5P025888	0.00891639	4.24891	335.238	78.8997	8.13876	6.37102	90.9255	117.468	78.4406	65.6334	42.0315	78.8997	340.071	268.718	229.853	355.744	481.804	335.238	8.06488	6.27887	7.7613	6.57567	7.90574	6.71475	8.23859	6.74851	8.72332	5.53733	P	P	P	P	P	P	P	P	P	P	noncoding	NR_045670	PSMC3IP	RefSeq	1379	chr17	-	40724327	40729849	GTTTGACATGAGCTCAAGGAATTATCTAGTGCCCTGACCACACCAGAGATGCAGAAAGAA	natural antisense
ASHGA5P029450	0.00630127	4.22853	412.444	97.5383	8.32072	6.71522	102.793	134.02	87.1864	59.7248	103.968	97.5383	353.745	507.733	154.322	380.074	666.347	412.444	8.11845	6.47424	8.66103	6.7538	7.32678	6.86494	8.32967	6.59457	9.16765	6.88853	P	P	P	P	P	P	P	P	P	P	noncoding	TCONS_00016163	XLOC_007573	LincRNAs identified by Cabili et al	658	chr9	+	130546161	130547450	TCGCCGCTAGTGCCGCCGCGCCCCCTGGCGGCCGTCGGTTGCCATGTCAACGGAGGGTGG	intergenic
ASHGA5P037540	0.00607687	4.18787	278.579	66.5204	7.79364	6.08904	65.584	109.241	70.5898	53.3878	33.7993	66.5204	113.452	301.995	276.272	435.622	265.553	278.579	6.49411	5.7659	7.92323	6.4738	8.16304	6.56395	8.51911	6.41373	7.86873	5.22783	P	P	P	M	P	P	P	P	P	P	noncoding	ENST00000472972	KCNMB3P1	GENCODE	307	chr22	-	17061966	17063492	ACCCATTCAGCTCAGAAAGCTCTCCTACATTATAATGAAGAGGCTGTCCAGATAAATCCC	intergenic
ASHGA5P031130	0.00199753	4.14491	1069.37	257.996	9.77842	8.1783	270.567	311.651	319.28	189.069	199.412	257.996	830.862	1259.64	1410.54	703.062	1142.75	1069.37	9.36037	7.97903	9.94836	7.95675	10.445	8.69353	9.19815	8.35922	9.94024	7.90296	P	P	P	P	P	P	P	P	P	P	noncoding	ENST00000567422	RP11-23E10.4	pseudogene	509	chr16	-	33365496	33373402	GCTCCTGAAGTTCTTGTTTGTGTTGGACTGCTGGGTTTTAGGAGTTATTCTTTTTATCTG
ASHGA5P031284	0.0228656	4.11463	6547.55	1591.28	12.2818	10.7357	2225.99	2338.87	1701.64	925.628	764.291	1591.28	7045.3	3688.62	9172.85	3739.86	9091.12	6547.55	12.3744	11.1368	11.5357	10.8842	13.0525	11.0465	11.5386	10.6971	12.9079	9.91386	P	P	P	P	P	P	P	P	P	P	noncoding	ENST00000444470	GAS5	GENCODE	424	chr1	-	173833091	173834043	GGAGATTTTGGATTACTCCTAATTGTATGCAAGTTGTCTTACTGTGTATTGTCCCTTAAT	intergenic
ASHGA5P037527	0.0186451	4.10723	207.047	50.4103	7.28466	5.77207	55.6973	55.3274	40.713	44.6459	55.6679	50.4103	105.928	306.312	121.116	114.45	387.428	207.047	6.3914	5.50088	7.94458	5.52396	7.00326	5.76805	6.67305	6.12227	8.41102	5.94518	P	P	P	P	P	P	P	P	M	P	noncoding	ENST00000420074	MCM3AP-AS1	GENCODE	1947	chr21	+	47649437	47655367	CTCTGACAGCTGCAGTTGCTCCCTCATCATGTCACTCTATTTGAATAAAAAAGAAACTGA	natural antisense
ASHGA5P031549	0.0204282	4.07962	707.688	173.469	9.13039	7.56686	200.679	243.994	172.709	145.527	104.436	173.469	395.251	687.276	533.035	670.693	1252.19	707.688	8.27687	7.52599	9.09966	7.60776	9.08109	7.82956	9.12406	7.97474	10.0703	6.89623	P	P	P	P	P	P	P	P	P	P	noncoding	ENST00000575792	RP11-65J21.3	GENCODE	362	chr16	+	14417150	14420141	ATAAAACCAAACAACTTGGAACCGCTCCAAGAGAGGGGATTAAAGCAACATGTTATTCTG	intergenic
ASHGA5P027168	0.00928791	4.07183	117.336	28.8164	6.56986	4.89289	30.95	37.4042	23.1387	29.4348	23.1545	28.8164	237.541	74.9551	68.2622	116.114	89.8064	117.336	7.56884	4.52027	6.02211	4.98257	6.21957	4.87468	6.69356	5.39682	6.34524	4.69013	P	P	P	P	P	P	P	M	P	P	noncoding	NR_038927	DDX11-AS1	RefSeq	2031	chr12	-	31173696	31226781	CTGCTGTGTACACAGGAGAAATAATCACTCCACACCCGACTGAACATTTTCTAACCTTAT	natural antisense
ASHGA5P027168	0.00928791	4.07183	117.336	28.8164	6.56986	4.89289	30.95	37.4042	23.1387	29.4348	23.1545	28.8164	237.541	74.9551	68.2622	116.114	89.8064	117.336	7.56884	4.52027	6.02211	4.98257	6.21957	4.87468	6.69356	5.39682	6.34524	4.69013	P	P	P	P	P	P	P	M	P	P	noncoding	NR_038927	DDX11-AS1	RefSeq	2031	chr12	-	31173696	31226781	CTGCTGTGTACACAGGAGAAATAATCACTCCACACCCGACTGAACATTTTCTAACCTTAT	natural antisense
ASHGA5P027168	0.00928791	4.07183	117.336	28.8164	6.56986	4.89289	30.95	37.4042	23.1387	29.4348	23.1545	28.8164	237.541	74.9551	68.2622	116.114	89.8064	117.336	7.56884	4.52027	6.02211	4.98257	6.21957	4.87468	6.69356	5.39682	6.34524	4.69013	P	P	P	P	P	P	P	M	P	P	noncoding	NR_038927	DDX11-AS1	RefSeq	2031	chr12	-	31173696	31226781	CTGCTGTGTACACAGGAGAAATAATCACTCCACACCCGACTGAACATTTTCTAACCTTAT	natural antisense
ASHGA5P027168	0.00928791	4.07183	117.336	28.8164	6.56986	4.89289	30.95	37.4042	23.1387	29.4348	23.1545	28.8164	237.541	74.9551	68.2622	116.114	89.8064	117.336	7.56884	4.52027	6.02211	4.98257	6.21957	4.87468	6.69356	5.39682	6.34524	4.69013	P	P	P	P	P	P	P	M	P	P	noncoding	NR_038927	DDX11-AS1	RefSeq	2031	chr12	-	31173696	31226781	CTGCTGTGTACACAGGAGAAATAATCACTCCACACCCGACTGAACATTTTCTAACCTTAT	natural antisense
ASHGA5P027168	0.00928791	4.07183	117.336	28.8164	6.56986	4.89289	30.95	37.4042	23.1387	29.4348	23.1545	28.8164	237.541	74.9551	68.2622	116.114	89.8064	117.336	7.56884	4.52027	6.02211	4.98257	6.21957	4.87468	6.69356	5.39682	6.34524	4.69013	P	P	P	P	P	P	P	M	P	P	noncoding	NR_038927	DDX11-AS1	RefSeq	2031	chr12	-	31173696	31226781	CTGCTGTGTACACAGGAGAAATAATCACTCCACACCCGACTGAACATTTTCTAACCTTAT	natural antisense
ASHGA5P048259	0.0102307	4.06589	206.691	50.8354	7.28191	5.72238	37.1861	59.0673	62.1225	67.0141	28.7868	50.8354	92.0949	358.183	114.325	322.078	146.775	206.691	6.19614	4.83422	8.16521	5.61668	6.93174	6.38447	8.08825	6.77808	7.02818	4.99843	P	P	M	P	P	P	P	P	M	P	noncoding	ENST00000532296	RP5-901A4.1	GENCODE	739	chr11	-	67792276	67797928	CGACCTTGGATTACAGCCCCTGGAGTCAAATAAATATACCTGAGTCCGTAGTGACCTAAA	intronic antisense
ASHGA5P048259	0.0102307	4.06589	206.691	50.8354	7.28191	5.72238	37.1861	59.0673	62.1225	67.0141	28.7868	50.8354	92.0949	358.183	114.325	322.078	146.775	206.691	6.19614	4.83422	8.16521	5.61668	6.93174	6.38447	8.08825	6.77808	7.02818	4.99843	P	P	M	P	P	P	P	P	M	P	noncoding	ENST00000532296	RP5-901A4.1	GENCODE	739	chr11	-	67792276	67797928	CGACCTTGGATTACAGCCCCTGGAGTCAAATAAATATACCTGAGTCCGTAGTGACCTAAA	intronic antisense
ASHGA5P048259	0.0102307	4.06589	206.691	50.8354	7.28191	5.72238	37.1861	59.0673	62.1225	67.0141	28.7868	50.8354	92.0949	358.183	114.325	322.078	146.775	206.691	6.19614	4.83422	8.16521	5.61668	6.93174	6.38447	8.08825	6.77808	7.02818	4.99843	P	P	M	P	P	P	P	P	M	P	noncoding	ENST00000532296	RP5-901A4.1	GENCODE	739	chr11	-	67792276	67797928	CGACCTTGGATTACAGCCCCTGGAGTCAAATAAATATACCTGAGTCCGTAGTGACCTAAA	intronic antisense
ASHGA5P051524	0.0246497	4.02799	291.763	72.4338	7.68653	6.23713	84.2998	116.485	44.3494	58.329	58.7054	72.4338	175.179	415.901	62.1362	336.511	469.088	291.763	7.13247	6.15528	8.3731	6.56411	6.08603	5.88823	8.15682	6.55399	8.68421	6.02401	P	P	P	P	P	P	P	P	P	P	noncoding	ENST00000444883	AL592284.1	GENCODE	372	chr1	-	144506090	144516503	CAGAACAACCTGAAGTTCTTTAAGCTGTCAGTTGAAGGACTAGGTAAAAAACAAATATCA	intronic antisense
ASHGA5P022329	0.0043917	4.01932	167.224	41.605	7.03224	5.41486	45.2931	49.1625	48.5468	23.7048	41.3177	41.605	91.4523	236.87	297.176	113.097	97.5245	167.224	6.18637	5.16277	7.58982	5.36275	8.26621	6.02949	6.65714	5.00737	6.46165	5.51191	P	P	M	P	P	P	P	P	P	P	noncoding	ENST00000554701	CHEK2P2	pseudogene	670	chr15	+	20488748	20496811	CTCTACTCCAGGTTCTAGCCCAGAGGCACAAAGGTTGTCTTCCCGCAAAAGACCAAGACT
ASHGA5P051520	0.0408136	3.97979	1287.4	323.484	9.7597	8.513	364.155	446.878	251.142	249.793	305.45	323.484	1411.06	1647.1	315.967	2443.27	619.583	1287.4	10.0835	8.42738	10.3411	8.46278	8.36178	8.36712	10.9394	8.76612	9.07274	8.54162	P	P	P	P	P	P	P	P	P	P	noncoding	uc001eky.4	LOC728875	UCSC_knowngene	822	chr1	-	144480745	144521009	TGTATCCACCCTGCCCAGTCGCTGTTGGGCTGCTGCGGAGCTTCCGCTGCCATCTTCGGA	natural antisense
ASHGA5P035114	0.0206206	3.93818	1244.08	315.902	9.85772	8.47003	307.662	374.816	401.949	200.709	294.372	315.902	817.876	2618.09	1102.13	1066.08	616.209	1244.08	9.34123	8.17269	11.0137	8.21402	10.0996	9.03423	9.7686	8.44827	9.06541	8.48096	P	P	P	M	P	P	P	P	P	P	noncoding	ENST00000413452	DGUOK-AS1	GENCODE	419	chr2	-	74185142	74208488	CCAAGTCTTACTCAGAGAACAGATCTAAATTCAACATGACTTTTCAAAGAAACTGCATGT	natural antisense
ASHGA5P035114	0.0206206	3.93818	1244.08	315.902	9.85772	8.47003	307.662	374.816	401.949	200.709	294.372	315.902	817.876	2618.09	1102.13	1066.08	616.209	1244.08	9.34123	8.17269	11.0137	8.21402	10.0996	9.03423	9.7686	8.44827	9.06541	8.48096	P	P	P	M	P	P	P	P	P	P	noncoding	ENST00000413452	DGUOK-AS1	GENCODE	419	chr2	-	74185142	74208488	CCAAGTCTTACTCAGAGAACAGATCTAAATTCAACATGACTTTTCAAAGAAACTGCATGT	natural antisense
ASHGA5P016010	0.0367216	3.93524	413.359	105.04	8.23242	6.83565	148.728	121.194	89.1959	67.6838	98.3993	105.04	344.208	154.509	756.501	201.539	610.035	413.359	8.08434	7.06356	7.01002	6.61726	9.58016	6.8981	7.43625	6.79578	9.0513	6.80357	P	P	P	P	P	P	P	P	P	P	noncoding	ENST00000425771	GAS5	GENCODE	242	chr1	-	173835004	173836178	AGTTGAAATGTTTTGGCAGGGGGTGAACACTCATCTGTGGCTATTCTAAGACCACTCTTA	intergenic
ASHGA5P014632	0.0350709	3.91528	270.383	69.0585	7.52093	6.12767	44.0402	114.641	83.3063	48.8753	54.4301	69.0585	78.4432	248.185	123.848	622.999	278.442	270.383	5.96767	5.11985	7.65339	6.53954	7.0328	6.79977	9.01871	6.27075	7.93209	5.90846	P	P	P	P	P	P	P	P	P	P	noncoding	ENST00000432001	AL589743.1	GENCODE	768	chr14	+	19650017	19691922	GGTCTCCGCGGAAAGAAAAAAGAAGAAAACAAACCTCCATACGAGAATGGGTCTAAAGGA	intergenic
ASHGA5P016921	0.00205565	3.89646	645.355	165.626	9.09864	7.45555	219.675	247.863	154.533	110.43	95.6294	165.626	737.527	667.202	610.798	492.665	718.583	645.355	9.18636	7.65733	9.06158	7.63175	9.27136	7.68004	8.69933	7.54924	9.27457	6.75936	P	P	P	P	P	P	P	P	P	P	noncoding	ENST00000435718	RP4-564F22.2	GENCODE	261	chr20	-	37049531	37059692	TTCAGTGGCTGTTGCAGAGGAAGAGCCTCTGGAAATCTGCGTGGAATCTCTTGGTGGTGT	intergenic
ASHGA5P036775	0.0278573	3.84997	824.715	214.213	9.10233	7.71614	324.594	192.644	351.873	120.907	81.0461	214.213	1075.46	431.378	1829.88	242.159	544.695	824.715	9.70287	8.25532	8.42502	7.2742	10.8123	8.84051	7.68335	7.70351	8.88807	6.50715	P	P	P	P	P	P	P	P	P	P	noncoding	uc002xid.1	AX746690	UCSC_knowngene	2002	chr20	-	37034659	37045444	AAGGCTCAACTGGGTATGATTGTCATGAGATCACTTCAGCCAATAAACAGAAATTATGAT	intergenic
ASHGA5P007375	0.00152605	3.79556	7552.64	1989.86	12.5891	11.1608	2156.85	2501.81	1742.38	1242.06	2306.21	1989.86	11594.3	6790.63	6440.95	5440.77	7496.59	7552.64	13.143	11.0882	12.4382	10.9856	12.5965	11.0786	12.1135	11.1332	12.6546	11.5183	P	P	P	P	P	P	P	P	P	P	noncoding	NR_024206	LINC00152	RefSeq	518	chr2	+	87754973	87821030	CCTCTCCTTGAATAACTGGGAGATGAAACAGGAAGCTCTATGACACACTTGATCGAATAT	intergenic
ASHGA5P037181	0.0015105	3.79075	562.877	148.487	8.63225	7.2276	293.426	160.601	76.0051	86.689	125.714	148.487	1383.51	285.186	281.545	404.342	459.801	562.877	10.0545	8.10574	7.84479	7.0057	8.18664	6.66921	8.417	7.1766	8.65834	7.18077	P	P	P	P	P	P	P	P	P	P	noncoding	NR_045370	LOC100505815	RefSeq	4760	chr20	+	62507483	62512243	CGAACCACAGAATGTTCACATGGTTTTATGCATTTGTTATTTCAGGGAAAATCAAGGTTA	intron sense-overlapping
ASHGA5P037181	0.0015105	3.79075	562.877	148.487	8.63225	7.2276	293.426	160.601	76.0051	86.689	125.714	148.487	1383.51	285.186	281.545	404.342	459.801	562.877	10.0545	8.10574	7.84479	7.0057	8.18664	6.66921	8.417	7.1766	8.65834	7.18077	P	P	P	P	P	P	P	P	P	P	noncoding	NR_045370	LOC100505815	RefSeq	4760	chr20	+	62507483	62512243	CGAACCACAGAATGTTCACATGGTTTTATGCATTTGTTATTTCAGGGAAAATCAAGGTTA	intron sense-overlapping
ASHGA5P037181	0.0015105	3.79075	562.877	148.487	8.63225	7.2276	293.426	160.601	76.0051	86.689	125.714	148.487	1383.51	285.186	281.545	404.342	459.801	562.877	10.0545	8.10574	7.84479	7.0057	8.18664	6.66921	8.417	7.1766	8.65834	7.18077	P	P	P	P	P	P	P	P	P	P	noncoding	NR_045370	LOC100505815	RefSeq	4760	chr20	+	62507483	62512243	CGAACCACAGAATGTTCACATGGTTTTATGCATTTGTTATTTCAGGGAAAATCAAGGTTA	intron sense-overlapping
ASHGA5P037181	0.0015105	3.79075	562.877	148.487	8.63225	7.2276	293.426	160.601	76.0051	86.689	125.714	148.487	1383.51	285.186	281.545	404.342	459.801	562.877	10.0545	8.10574	7.84479	7.0057	8.18664	6.66921	8.417	7.1766	8.65834	7.18077	P	P	P	P	P	P	P	P	P	P	noncoding	NR_045370	LOC100505815	RefSeq	4760	chr20	+	62507483	62512243	CGAACCACAGAATGTTCACATGGTTTTATGCATTTGTTATTTCAGGGAAAATCAAGGTTA	intron sense-overlapping
ASHGA5P037181	0.0015105	3.79075	562.877	148.487	8.63225	7.2276	293.426	160.601	76.0051	86.689	125.714	148.487	1383.51	285.186	281.545	404.342	459.801	562.877	10.0545	8.10574	7.84479	7.0057	8.18664	6.66921	8.417	7.1766	8.65834	7.18077	P	P	P	P	P	P	P	P	P	P	noncoding	NR_045370	LOC100505815	RefSeq	4760	chr20	+	62507483	62512243	CGAACCACAGAATGTTCACATGGTTTTATGCATTTGTTATTTCAGGGAAAATCAAGGTTA	intron sense-overlapping
ASHGA5P037181	0.0015105	3.79075	562.877	148.487	8.63225	7.2276	293.426	160.601	76.0051	86.689	125.714	148.487	1383.51	285.186	281.545	404.342	459.801	562.877	10.0545	8.10574	7.84479	7.0057	8.18664	6.66921	8.417	7.1766	8.65834	7.18077	P	P	P	P	P	P	P	P	P	P	noncoding	NR_045370	LOC100505815	RefSeq	4760	chr20	+	62507483	62512243	CGAACCACAGAATGTTCACATGGTTTTATGCATTTGTTATTTCAGGGAAAATCAAGGTTA	intron sense-overlapping
ASHGA5P037181	0.0015105	3.79075	562.877	148.487	8.63225	7.2276	293.426	160.601	76.0051	86.689	125.714	148.487	1383.51	285.186	281.545	404.342	459.801	562.877	10.0545	8.10574	7.84479	7.0057	8.18664	6.66921	8.417	7.1766	8.65834	7.18077	P	P	P	P	P	P	P	P	P	P	noncoding	NR_045370	LOC100505815	RefSeq	4760	chr20	+	62507483	62512243	CGAACCACAGAATGTTCACATGGTTTTATGCATTTGTTATTTCAGGGAAAATCAAGGTTA	intron sense-overlapping
ASHGA5P037181	0.0015105	3.79075	562.877	148.487	8.63225	7.2276	293.426	160.601	76.0051	86.689	125.714	148.487	1383.51	285.186	281.545	404.342	459.801	562.877	10.0545	8.10574	7.84479	7.0057	8.18664	6.66921	8.417	7.1766	8.65834	7.18077	P	P	P	P	P	P	P	P	P	P	noncoding	NR_045370	LOC100505815	RefSeq	4760	chr20	+	62507483	62512243	CGAACCACAGAATGTTCACATGGTTTTATGCATTTGTTATTTCAGGGAAAATCAAGGTTA	intron sense-overlapping
ASHGA5P037181	0.0015105	3.79075	562.877	148.487	8.63225	7.2276	293.426	160.601	76.0051	86.689	125.714	148.487	1383.51	285.186	281.545	404.342	459.801	562.877	10.0545	8.10574	7.84479	7.0057	8.18664	6.66921	8.417	7.1766	8.65834	7.18077	P	P	P	P	P	P	P	P	P	P	noncoding	NR_045370	LOC100505815	RefSeq	4760	chr20	+	62507483	62512243	CGAACCACAGAATGTTCACATGGTTTTATGCATTTGTTATTTCAGGGAAAATCAAGGTTA	intron sense-overlapping
ASHGA5P037181	0.0015105	3.79075	562.877	148.487	8.63225	7.2276	293.426	160.601	76.0051	86.689	125.714	148.487	1383.51	285.186	281.545	404.342	459.801	562.877	10.0545	8.10574	7.84479	7.0057	8.18664	6.66921	8.417	7.1766	8.65834	7.18077	P	P	P	P	P	P	P	P	P	P	noncoding	NR_045370	LOC100505815	RefSeq	4760	chr20	+	62507483	62512243	CGAACCACAGAATGTTCACATGGTTTTATGCATTTGTTATTTCAGGGAAAATCAAGGTTA	intron sense-overlapping
ASHGA5P051098	0.0266695	3.78788	191.295	50.5019	7.19531	5.75461	62.7952	59.8248	48.8052	36.279	44.8054	50.5019	283.405	254.128	64.5846	105.543	248.817	191.295	7.81502	5.69907	7.68552	5.63374	6.14048	6.03737	6.55717	5.76907	7.77834	5.63382	P	P	P	P	P	P	P	P	P	P	noncoding	ENST00000433071	AP000251.2	GENCODE	843	chr21	+	32931536	32932800	GATAAACCTAAACCGGAAAATTGAAAGTCATCCCTGATTCCTCCTTCTTCTTAACCCTCT	bidirectional
ASHGA5P035238	0.00587101	3.76688	394.421	104.708	8.2834	6.6019	171.902	94.9871	24.3188	76.0373	156.293	104.708	598.697	308.051	206.278	271.851	587.228	394.421	8.87744	7.29294	7.95134	6.26801	7.75619	4.95573	7.84084	6.97736	8.99119	7.51544	P	P	P	P	P	P	P	P	P	P	noncoding	ENST00000433198	AC068491.1	GENCODE	421	chr2	-	112186890	112199198	TTATCTGGGATCTTTTGCTGCTGCTTTGGTATGACTTCTATCAAGATAGCTTTCGACGAG	intergenic
ASHGA5P014500	0.00109462	3.76023	7075.11	1881.56	12.4948	11.0809	2027.88	2419.05	1616.53	1190.7	2153.67	1881.56	10723.2	6207.92	5909.65	5308.07	7226.78	7075.11	13.0038	11.0018	12.3274	10.9378	12.4634	10.979	12.0784	11.0618	12.6011	11.4242	P	P	P	P	P	P	P	P	P	P	noncoding	NR_024373	LOC541471	RefSeq	557	chr2	-	112186885	112252692	CCTCTCCCTGAATAACTGGGAGATGAAACAGGAAGCTCTATGACACACTTGATCGAATAT	intergenic
ASHGA5P017086	0.00272652	3.74654	6350.03	1694.9	12.3226	10.932	1676.63	2170.7	1601.73	1045.92	1979.53	1694.9	10069.4	5523.36	5265.52	4669.58	6222.32	6350.03	12.9133	10.7287	12.142	10.7818	12.2981	10.9632	11.884	10.8786	12.3756	11.308	P	P	P	P	P	P	P	P	P	P	noncoding	ENST00000437561	LINC00152	GENCODE	455	chr2	+	87769468	87820932	TTTTATTTGGAATAACTGGGAGATGAAACAGGAAGCTCTATGACACACTTGATCGAATAT	intergenic
ASHGA5P050525	0.0364062	3.74062	811.409	216.918	9.2342	7.92809	226.858	249.321	243.238	132.346	232.829	216.918	504.598	1661.79	834.203	712.98	343.469	811.409	8.63263	7.70915	10.3516	7.64279	9.72716	8.3207	9.2203	7.83779	8.23929	8.13002	P	P	P	P	P	P	P	P	P	P	noncoding	ENST00000439192	DGUOK-AS1	GENCODE	563	chr2	-	74185096	74208560	AACAGATCTAAATTCAACATGACTTTTCAAAGAAACTGCATGTAAACTGCATTTAAAAAA	natural antisense
ASHGA5P050525	0.0364062	3.74062	811.409	216.918	9.2342	7.92809	226.858	249.321	243.238	132.346	232.829	216.918	504.598	1661.79	834.203	712.98	343.469	811.409	8.63263	7.70915	10.3516	7.64279	9.72716	8.3207	9.2203	7.83779	8.23929	8.13002	P	P	P	P	P	P	P	P	P	P	noncoding	ENST00000439192	DGUOK-AS1	GENCODE	563	chr2	-	74185096	74208560	AACAGATCTAAATTCAACATGACTTTTCAAAGAAACTGCATGTAAACTGCATTTAAAAAA	natural antisense
ASHGA5P014767	0.00174339	3.73198	6455.4	1729.75	12.3603	10.9749	1899.81	2036.21	1545.44	1151.89	2015.41	1729.75	9499.07	5932.72	5828.82	4708.82	6307.58	6455.4	12.811	10.9062	12.2627	10.6919	12.437	10.916	11.8961	11.0252	12.3947	11.3352	P	P	P	P	P	P	P	P	P	P	noncoding	ENST00000413202	LINC00152	GENCODE	422	chr2	+	87808732	87821033	TTTCGACGAGAATAACTGGGAGATGAAACAGGAAGCTCTATGACACACTTGATCGAATAT	intergenic
ASHGA5P017314	0.00867686	3.67796	1527.01	415.178	10.1491	8.86058	628.28	445.528	338.677	277.435	385.969	415.178	1647.47	783.501	789.655	2946.39	1468.01	1527.01	10.316	9.25405	9.28741	8.45834	9.65088	8.77777	11.2002	8.91238	10.2912	8.90036	P	P	M	M	P	P	P	P	P	P	noncoding	NR_037669	GGCT	RefSeq	1051	chr7	-	30536236	30544457	CCGCCTGCAGGCAAGAAGGGGTTAAAAGTGGAATGTATGTTGTAATAGAAGTTAAAGTTG	exon sense-overlapping
ASHGA5P017314	0.00867686	3.67796	1527.01	415.178	10.1491	8.86058	628.28	445.528	338.677	277.435	385.969	415.178	1647.47	783.501	789.655	2946.39	1468.01	1527.01	10.316	9.25405	9.28741	8.45834	9.65088	8.77777	11.2002	8.91238	10.2912	8.90036	P	P	M	M	P	P	P	P	P	P	noncoding	NR_037669	GGCT	RefSeq	1051	chr7	-	30536236	30544457	CCGCCTGCAGGCAAGAAGGGGTTAAAAGTGGAATGTATGTTGTAATAGAAGTTAAAGTTG	exon sense-overlapping
ASHGA5P017314	0.00867686	3.67796	1527.01	415.178	10.1491	8.86058	628.28	445.528	338.677	277.435	385.969	415.178	1647.47	783.501	789.655	2946.39	1468.01	1527.01	10.316	9.25405	9.28741	8.45834	9.65088	8.77777	11.2002	8.91238	10.2912	8.90036	P	P	M	M	P	P	P	P	P	P	noncoding	NR_037669	GGCT	RefSeq	1051	chr7	-	30536236	30544457	CCGCCTGCAGGCAAGAAGGGGTTAAAAGTGGAATGTATGTTGTAATAGAAGTTAAAGTTG	exon sense-overlapping
ASHGA5P017314	0.00867686	3.67796	1527.01	415.178	10.1491	8.86058	628.28	445.528	338.677	277.435	385.969	415.178	1647.47	783.501	789.655	2946.39	1468.01	1527.01	10.316	9.25405	9.28741	8.45834	9.65088	8.77777	11.2002	8.91238	10.2912	8.90036	P	P	M	M	P	P	P	P	P	P	noncoding	NR_037669	GGCT	RefSeq	1051	chr7	-	30536236	30544457	CCGCCTGCAGGCAAGAAGGGGTTAAAAGTGGAATGTATGTTGTAATAGAAGTTAAAGTTG	exon sense-overlapping
ASHGA5P035237	0.0205352	3.66605	456.14	124.422	8.41719	7.08969	163.806	144.539	82.6026	88.7245	142.44	124.422	939.65	299.766	347.573	191.733	501.976	456.14	9.52661	7.21885	7.91299	6.85697	8.49858	6.78895	7.36726	7.20806	8.78051	7.3756	P	P	P	P	P	P	P	P	P	P	noncoding	ENST00000453478	AC068491.1	GENCODE	560	chr2	-	112101667	112252631	GTCACCAGCATCTTTTCCAACCTTAATGAACTGTATCCTCAAAAGAACACTATCAGACTG	intergenic
ASHGA5P018571	0.000803011	3.65864	6534.93	1786.16	12.3757	11	1939.68	2360.43	1540.72	1077.85	2012.14	1786.16	9524.1	5826.3	5808.48	4871.86	6643.92	6534.93	12.8177	10.9394	12.2245	10.8948	12.4257	10.9131	11.9454	10.9213	12.4654	11.3312	P	P	P	P	P	P	P	P	P	P	noncoding	ENST00000455131	LINC00152	GENCODE	733	chr2	+	87755023	87820932	GGTGCTTCAGAATAACTGGGAGATGAAACAGGAAGCTCTATGACACACTTGATCGAATAT	intergenic
ASHGA5P034143	0.00517103	3.64448	520.867	142.919	8.71634	7.25851	85.1373	221.709	149.843	131.018	126.888	142.919	304.432	620.796	843.103	383.403	452.6	520.867	7.90766	6.16867	8.95272	7.47014	9.743	7.63497	8.34319	7.82306	8.63513	7.19571	P	P	M	P	P	P	P	P	P	P	noncoding	NR_046201	LOC400684	RefSeq	968	chr19	-	32880955	32896445	TTGTGTGGAATGCTAGCTCTGGAAGAGCAGAAATAAATACAGCTTAAGCTTTGAACCATA	bidirectional
ASHGA5P034143	0.00517103	3.64448	520.867	142.919	8.71634	7.25851	85.1373	221.709	149.843	131.018	126.888	142.919	304.432	620.796	843.103	383.403	452.6	520.867	7.90766	6.16867	8.95272	7.47014	9.743	7.63497	8.34319	7.82306	8.63513	7.19571	P	P	M	P	P	P	P	P	P	P	noncoding	NR_046201	LOC400684	RefSeq	968	chr19	-	32880955	32896445	TTGTGTGGAATGCTAGCTCTGGAAGAGCAGAAATAAATACAGCTTAAGCTTTGAACCATA	bidirectional
ASHGA5P008434	0.0354172	3.62609	270.293	74.5413	7.70972	6.3392	74.2475	80.2296	89.2574	51.564	77.4078	74.5413	210.965	338.632	89.9982	279.82	432.052	270.293	7.39566	5.9607	8.08963	6.0436	6.60274	6.90004	7.88969	6.35414	8.5709	6.43755	P	P	P	P	P	P	P	P	P	P	noncoding	uc003jcw.2	LOC728613	UCSC_knowngene	1402	chr5	-	1628869	1634120	ATTTTGTGGCTACCGCTGTTACTGCTTGGAGTGCCTCACCGAGCCAGGATGAAGCTCCAC	intergenic
ASHGA5P038017	0.0136492	3.62032	603.051	166.574	8.79498	7.52961	145.447	251.406	150.781	142.431	142.804	166.574	193.254	882.876	363.061	942.889	633.176	603.051	7.27023	7.02628	9.45471	7.65489	8.55398	7.643	9.59086	7.94521	9.10512	7.37869	P	P	P	P	P	P	P	P	P	P	noncoding	ENST00000420096	Z83851.4	GENCODE	544	chr22	+	42672360	42673057	CTGAGCGGCTTCACCATTCAAGTTTATTCCTATCAGCCTGGAATACAATGCTCTATCTGG	intronic antisense
ASHGA5P005264	0.0489201	3.58464	3227.18	900.279	11.2143	9.98257	826.585	1037.27	1256.41	834.768	546.358	900.279	1018.07	3682.12	2296.52	5051.91	4087.27	3227.18	9.62697	9.66574	11.5326	9.68555	11.1353	10.627	11.9992	10.531	11.7773	9.40364	P	P	P	P	P	P	P	P	P	P	noncoding	ENST00000512851	RP11-423H2.1	pseudogene	1056	chr5	+	177302595	177310832	ATCATTTTATTGACATTGCTGAAGTGGAGACAGGGGACAAACTATGGGAGGTACAGTGTG
ASHGA5P051521	0.040323	3.53129	1740.66	492.925	10.261	9.11407	522.715	732.689	381.269	346.721	481.229	492.925	2059.67	2199.03	475.416	2988.62	980.557	1740.66	10.6479	8.97033	10.7685	9.17482	8.92952	8.95713	11.2231	9.24912	9.73575	9.21898	P	P	P	P	P	P	P	P	P	P	noncoding	NR_024584	LOC728875	RefSeq	772	chr1	-	144480745	144521969	TGGTTCTTCCGGTTCTTTGTGCCGCCTTCACCCAGTGAAGGAGCCTGTATCCACCCTGCC	natural antisense
ASHGA5P026000	0.041146	3.50804	185.407	52.8521	7.07964	5.7901	56.3499	79.1179	41.2121	37.2841	50.2963	52.8521	135.655	90.8158	76.7844	199.047	424.734	185.407	6.75314	5.52254	6.28462	6.02674	6.38942	5.78463	7.42173	5.81807	8.54929	5.79854	P	P	P	P	P	P	P	P	P	P	noncoding	NR_051956	ARFRP1	RefSeq	2570	chr20	-	62329994	62339365	ATTGACTCCACCGACGAGGAGAGGCTGGCTGAGTCCAAGCAGGCGTTTGGTGGTGACCAG	exon sense-overlapping
ASHGA5P026000	0.041146	3.50804	185.407	52.8521	7.07964	5.7901	56.3499	79.1179	41.2121	37.2841	50.2963	52.8521	135.655	90.8158	76.7844	199.047	424.734	185.407	6.75314	5.52254	6.28462	6.02674	6.38942	5.78463	7.42173	5.81807	8.54929	5.79854	P	P	P	P	P	P	P	P	P	P	noncoding	NR_051956	ARFRP1	RefSeq	2570	chr20	-	62329994	62339365	ATTGACTCCACCGACGAGGAGAGGCTGGCTGAGTCCAAGCAGGCGTTTGGTGGTGACCAG	exon sense-overlapping
ASHGA5P026000	0.041146	3.50804	185.407	52.8521	7.07964	5.7901	56.3499	79.1179	41.2121	37.2841	50.2963	52.8521	135.655	90.8158	76.7844	199.047	424.734	185.407	6.75314	5.52254	6.28462	6.02674	6.38942	5.78463	7.42173	5.81807	8.54929	5.79854	P	P	P	P	P	P	P	P	P	P	noncoding	NR_051956	ARFRP1	RefSeq	2570	chr20	-	62329994	62339365	ATTGACTCCACCGACGAGGAGAGGCTGGCTGAGTCCAAGCAGGCGTTTGGTGGTGACCAG	exon sense-overlapping
ASHGA5P026000	0.041146	3.50804	185.407	52.8521	7.07964	5.7901	56.3499	79.1179	41.2121	37.2841	50.2963	52.8521	135.655	90.8158	76.7844	199.047	424.734	185.407	6.75314	5.52254	6.28462	6.02674	6.38942	5.78463	7.42173	5.81807	8.54929	5.79854	P	P	P	P	P	P	P	P	P	P	noncoding	NR_051956	ARFRP1	RefSeq	2570	chr20	-	62329994	62339365	ATTGACTCCACCGACGAGGAGAGGCTGGCTGAGTCCAAGCAGGCGTTTGGTGGTGACCAG	exon sense-overlapping
ASHGA5P026000	0.041146	3.50804	185.407	52.8521	7.07964	5.7901	56.3499	79.1179	41.2121	37.2841	50.2963	52.8521	135.655	90.8158	76.7844	199.047	424.734	185.407	6.75314	5.52254	6.28462	6.02674	6.38942	5.78463	7.42173	5.81807	8.54929	5.79854	P	P	P	P	P	P	P	P	P	P	noncoding	NR_051956	ARFRP1	RefSeq	2570	chr20	-	62329994	62339365	ATTGACTCCACCGACGAGGAGAGGCTGGCTGAGTCCAAGCAGGCGTTTGGTGGTGACCAG	exon sense-overlapping
ASHGA5P026000	0.041146	3.50804	185.407	52.8521	7.07964	5.7901	56.3499	79.1179	41.2121	37.2841	50.2963	52.8521	135.655	90.8158	76.7844	199.047	424.734	185.407	6.75314	5.52254	6.28462	6.02674	6.38942	5.78463	7.42173	5.81807	8.54929	5.79854	P	P	P	P	P	P	P	P	P	P	noncoding	NR_051956	ARFRP1	RefSeq	2570	chr20	-	62329994	62339365	ATTGACTCCACCGACGAGGAGAGGCTGGCTGAGTCCAAGCAGGCGTTTGGTGGTGACCAG	exon sense-overlapping
ASHGA5P026000	0.041146	3.50804	185.407	52.8521	7.07964	5.7901	56.3499	79.1179	41.2121	37.2841	50.2963	52.8521	135.655	90.8158	76.7844	199.047	424.734	185.407	6.75314	5.52254	6.28462	6.02674	6.38942	5.78463	7.42173	5.81807	8.54929	5.79854	P	P	P	P	P	P	P	P	P	P	noncoding	NR_051956	ARFRP1	RefSeq	2570	chr20	-	62329994	62339365	ATTGACTCCACCGACGAGGAGAGGCTGGCTGAGTCCAAGCAGGCGTTTGGTGGTGACCAG	exon sense-overlapping
ASHGA5P026000	0.041146	3.50804	185.407	52.8521	7.07964	5.7901	56.3499	79.1179	41.2121	37.2841	50.2963	52.8521	135.655	90.8158	76.7844	199.047	424.734	185.407	6.75314	5.52254	6.28462	6.02674	6.38942	5.78463	7.42173	5.81807	8.54929	5.79854	P	P	P	P	P	P	P	P	P	P	noncoding	NR_051956	ARFRP1	RefSeq	2570	chr20	-	62329994	62339365	ATTGACTCCACCGACGAGGAGAGGCTGGCTGAGTCCAAGCAGGCGTTTGGTGGTGACCAG	exon sense-overlapping
ASHGA5P026000	0.041146	3.50804	185.407	52.8521	7.07964	5.7901	56.3499	79.1179	41.2121	37.2841	50.2963	52.8521	135.655	90.8158	76.7844	199.047	424.734	185.407	6.75314	5.52254	6.28462	6.02674	6.38942	5.78463	7.42173	5.81807	8.54929	5.79854	P	P	P	P	P	P	P	P	P	P	noncoding	NR_051956	ARFRP1	RefSeq	2570	chr20	-	62329994	62339365	ATTGACTCCACCGACGAGGAGAGGCTGGCTGAGTCCAAGCAGGCGTTTGGTGGTGACCAG	intronic antisense
ASHGA5P026000	0.041146	3.50804	185.407	52.8521	7.07964	5.7901	56.3499	79.1179	41.2121	37.2841	50.2963	52.8521	135.655	90.8158	76.7844	199.047	424.734	185.407	6.75314	5.52254	6.28462	6.02674	6.38942	5.78463	7.42173	5.81807	8.54929	5.79854	P	P	P	P	P	P	P	P	P	P	noncoding	NR_051956	ARFRP1	RefSeq	2570	chr20	-	62329994	62339365	ATTGACTCCACCGACGAGGAGAGGCTGGCTGAGTCCAAGCAGGCGTTTGGTGGTGACCAG	natural antisense
ASHGA5P025704	0.00162561	3.50418	1925.45	549.472	10.654	9.26004	678.178	808.515	512.584	394.647	353.439	549.472	2269.64	1624.16	2047.25	1719.36	1966.85	1925.45	10.7892	9.36641	10.3244	9.33205	10.98	9.37734	10.4477	9.44999	10.7287	8.77442	P	P	P	P	P	P	P	P	P	P	noncoding	NR_027241	LOC388796	RefSeq	1186	chr20	-	37049238	37064018	CGTGGGTAAAGTCTCAGCCTTAGATCCAAGGACAGTCCAAGGAAGTCCTAAGACCATGGA	intergenic
ASHGA5P033740	0.00128352	3.49868	119.667	34.2035	6.6566	5.10907	26.2884	52.6224	32.7591	28.2253	31.1222	34.2035	76.0003	144.211	73.0582	143.46	161.607	119.667	5.91756	4.22778	6.91407	5.45795	6.31799	5.43418	6.97194	5.3172	7.16144	5.10824	P	P	P	P	P	P	P	P	P	P	noncoding	TCONS_00028653	XLOC_013728	LincRNAs identified by Cabili et al	498	chr20	-	32577407	32579666	AGTAATTGATGACATTGGAGCCAGAAATCGAATGAACCGGGCCCAGTTCAATCCACTTAC	intergenic
ASHGA5P053398	0.0166141	3.48338	9617.29	2760.91	12.8527	11.5644	3653.37	4017.67	2994.99	1594.49	1544.04	2760.91	9450.32	6318.43	16159.5	5704.21	10454	9617.29	12.7991	11.8394	12.351	11.6855	13.8504	11.857	12.1685	11.4947	13.0945	10.9453	M	P	P	P	P	P	P	P	P	P	noncoding	ENST00000436285	GAS5	GENCODE	772	chr1	-	173833038	173836181	GTAGGGCAAATTTTAAATGGGTATTATTTTTCATCTTCAAACAGGCAGACCTGTTATCCT	intergenic
ASHGA5P054715	0.0030607	3.47783	336.804	96.8433	8.06328	6.70093	153.145	83.1171	56.7155	78.7106	112.528	96.8433	311.465	277.479	177.445	619.325	298.308	336.804	7.9429	7.10919	7.80756	6.09309	7.5269	6.25721	9.00898	7.03354	8.03006	7.01163	P	P	M	M	P	P	P	P	P	P	noncoding	TCONS_00006770	XLOC_003405	LincRNAs identified by Cabili et al	487	chr3	-	197363225	197364301	TCAGTTACTGAGAAGAGAAAGAAAATGTCTTCTGAAAGAGGTGAACTCAGTCATTACCAA	intergenic
ASHGA5P033228	0.0462682	3.47556	174.744	50.2779	7.0464	5.63409	77.2013	62.9447	33.3525	25.4375	52.4534	50.2779	121.488	71.912	362.24	106.349	211.729	174.744	6.5938	6.01869	5.96817	5.70327	8.5517	5.4651	6.56827	5.12948	7.55007	5.85392	P	P	M	P	P	P	P	P	P	P	noncoding	ENST00000416221	RP11-295G20.2	GENCODE	465	chr1	-	231658133	231664302	GGAATAGCTTGTTATGCAACAATACATAATTAATACACTGGTCTCCCACTTTCAAGTTTG	natural antisense
ASHGA5P031377	0.0202983	3.47004	8534.35	2459.44	12.644	11.4847	2988.22	2137.79	2823.51	1861.49	2486.19	2459.44	7758.12	6211.5	4263.12	8424.03	16015	8534.35	12.5099	11.5513	12.3287	10.7598	11.9873	11.7781	12.7164	11.7094	13.6776	11.6251	P	P	P	P	P	P	P	P	P	P	noncoding	TCONS_00006773	XLOC_003406	LincRNAs identified by Cabili et al	4887	chr3	-	197374633	197381275	TGCTGATTGATTGATGAGACTTCTTTGCACAGGAGAGCTGCTAAAAATTACTGCGGTGAA	intergenic
ASHGA5P051508	0.046241	3.46121	1853.39	535.476	10.3384	9.25677	565.542	762.568	420.168	424.54	504.562	535.476	2249.24	2300.47	503.199	3228.05	986.003	1853.39	10.7709	9.09779	10.8344	9.23759	9.01141	9.1003	11.336	9.55649	9.73946	9.29168	P	P	P	P	P	P	P	P	P	P	noncoding	NR_024511	LINC00623	RefSeq	853	chr1	-	144300511	144340773	GGTTCTTCCGGTTCTTTGTGCCGCCTTCACCCAGTGAAGGAGCCTGTATCCACCCTGCCC	intronic antisense
ASHGA5P008433	0.0138639	3.4584	125.999	36.4326	6.65578	5.25526	27.413	40.9722	33.5579	37.2545	42.9655	36.4326	92.3114	158.813	46.4241	141.914	190.529	125.999	6.199	4.30193	7.048	5.11335	5.67137	5.476	6.95608	5.81513	7.40443	5.5699	P	P	P	P	P	P	M	P	P	P	noncoding	uc003jct.3	LOC728613	UCSC_knowngene	1313	chr5	-	1628800	1634120	CTCTCCAACGGACAAAGGAATCATTAGGACAAATTGTTAATACTGCTTCATGGTGGAGAT	intergenic
ASHGA5P053399	0.0177855	3.45719	11970.6	3462.52	13.1796	11.8896	4672.39	5043.38	3741.13	2006.4	1849.3	3462.52	12691.3	8279.96	18062.5	6531.41	14287.8	11970.6	13.2646	12.2135	12.7353	12.0072	14.0111	12.1785	12.3827	11.8314	13.5045	11.2177	P	P	P	P	P	P	P	P	P	P	noncoding	ENST00000422008	GAS5	GENCODE	497	chr1	-	173833621	173836168	GCAAAAGGTTTTGGTGGCATATACACCTTAATCTGTAGATGGGAGTGATTAGCTGTTTAA	intergenic
ASHGA5P015691	0.0322179	3.45115	957.907	277.561	9.46671	8.30247	353.085	323.588	237.196	213.198	260.74	277.561	1030.77	1468.92	303.713	1347.28	638.845	957.907	9.64723	8.38622	10.1737	8.01061	8.30257	8.28554	10.0969	8.52817	9.11317	8.30182	P	P	P	P	P	P	P	P	P	P	noncoding	ENST00000422629	BX248398.1	GENCODE	315	chr1	-	144301396	144341756	CTGTTTGCAGGCAGGACGACTGAGCAAGTTCTTGGAAAACCAGAGATATTAGAGCGGTGA	intronic antisense
ASHGA5P056702	0.0468437	3.44354	261.782	76.0213	7.60494	6.23984	71.8459	149.774	42.4056	63.5526	52.5283	76.0213	94.0252	296.944	194.248	193.658	530.036	261.782	6.22264	5.91171	7.89857	6.90804	7.66542	5.82569	7.38095	6.69794	8.85712	5.85582	P	P	P	P	P	P	P	P	P	P	noncoding	TCONS_00007951	XLOC_003416	LincRNAs identified by Cabili et al	1706	chr4	+	1000613	1002952	TAGACACTCCTGCAGCATCTTGAACATATGGAACATGGTCACAGCATAAGCATGTGTGTG	intergenic
ASHGA5P038644	0.0358363	3.41907	218.664	63.9543	7.41209	5.98922	92.0562	73.8233	72.5896	26.2227	55.0794	63.9543	119.433	196.67	139.178	188.489	449.55	218.664	6.56744	6.29798	7.33545	5.93276	7.19326	6.60251	7.33985	5.18708	8.62447	5.92579	P	P	P	P	P	P	P	P	P	P	noncoding	ENST00000570130	RP11-480A16.1	GENCODE	3508	chr3	-	195676058	195679566	GATTTAGTACACCGTGTTTCTGTCATGTTCTGTGGTGGTTTGCTCCTGACATGTGACCAT	intergenic
ASHGA5P055873	0.0264559	3.41567	368.759	107.961	8.09439	6.84819	141.851	147.689	67.5199	70.1126	112.632	107.961	180.622	402.89	148.462	701.656	410.165	368.759	7.17578	6.98682	8.3272	6.88951	7.28081	6.5016	9.1952	6.84995	8.49295	7.0131	P	P	P	P	P	P	P	P	P	P	noncoding	ENST00000546734	CTD-2314B22.1	GENCODE	787	chr14	+	19606384	19643377	ATCCTTCTCCATCCAGTATTGGGGGTCTTCCTCCTCCATCCAGGACTTGGGGGTCATCCT	intergenic
ASHGA5P037541	0.0125767	3.40955	320.665	94.0493	8.00081	6.55028	84.4552	177.424	98.0366	60.3174	50.0135	94.0493	139.443	301.145	339.806	528.28	294.653	320.665	6.79832	6.15783	7.91918	7.15324	8.47078	7.03734	8.79853	6.6126	8.01724	5.79041	P	P	P	P	P	P	P	P	P	P	noncoding	ENST00000493696	KCNMB3P1	pseudogene	572	chr22	-	17061815	17063607	AATTGAAGCATTCGGAGAGAAGAATCAACCTGCACTGCCATCCACACAGATATCATGGAC
ASHGA5P055040	0.00591512	3.40837	355.778	104.383	7.98347	6.82965	131.697	95.4896	57.1661	104.537	133.028	104.383	230.851	182.583	128.074	678.017	559.364	355.778	7.53108	6.87468	7.23762	6.27433	7.07936	6.26839	9.1448	7.46326	8.92451	7.26761	P	P	P	P	P	P	P	P	P	P	noncoding	ENST00000528075	RP11-21L23.3	GENCODE	336	chr11	-	76493624	76494106	AGGCAGCAGTTTCAGTCTATTCCCCCTGCTGTAGCTCTTGGGCTCTCACCCCTCTTTATG	intronic antisense
ASHGA5P038651	0.00213979	3.39605	489.621	144.174	8.60738	7.28183	101.605	230.301	109.195	148.009	131.759	144.174	331.445	367.413	316.127	836.215	596.905	489.621	8.02843	6.45152	8.19946	7.52306	8.36292	7.18357	9.42891	7.99577	9.01717	7.2552	P	P	P	M	P	P	P	P	P	P	noncoding	ENST00000441644	AC023797.1	GENCODE	348	chr3	-	196358368	196359458	CAGCGAACCTCAGTCACTGACACTCAAAAGAAGGAATTATTTCAACTCAATAATAAACAA	intergenic
ASHGA5P040084	0.0170199	3.38693	164.977	48.71	6.94642	5.66437	65.0092	68.2117	38.7557	35.1842	36.3891	48.71	196.266	340.543	135.951	88.4749	63.6507	164.977	7.28912	5.75231	8.09839	5.82023	7.16364	5.69789	6.31361	5.71569	5.86733	5.33575	P	P	P	P	P	P	P	P	P	P	noncoding	ENST00000506451	RP11-33B1.1	GENCODE	425	chr4	+	120415619	120419182	GAAGTGACAAAGTTCTGTCTTGCCTGTTCTCTCACAAAACAGCATATCAATTAAATAATG	natural antisense
ASHGA5P040084	0.0170199	3.38693	164.977	48.71	6.94642	5.66437	65.0092	68.2117	38.7557	35.1842	36.3891	48.71	196.266	340.543	135.951	88.4749	63.6507	164.977	7.28912	5.75231	8.09839	5.82023	7.16364	5.69789	6.31361	5.71569	5.86733	5.33575	P	P	P	P	P	P	P	P	P	P	noncoding	ENST00000506451	RP11-33B1.1	GENCODE	425	chr4	+	120415619	120419182	GAAGTGACAAAGTTCTGTCTTGCCTGTTCTCTCACAAAACAGCATATCAATTAAATAATG	natural antisense
ASHGA5P040084	0.0170199	3.38693	164.977	48.71	6.94642	5.66437	65.0092	68.2117	38.7557	35.1842	36.3891	48.71	196.266	340.543	135.951	88.4749	63.6507	164.977	7.28912	5.75231	8.09839	5.82023	7.16364	5.69789	6.31361	5.71569	5.86733	5.33575	P	P	P	P	P	P	P	P	P	P	noncoding	ENST00000506451	RP11-33B1.1	GENCODE	425	chr4	+	120415619	120419182	GAAGTGACAAAGTTCTGTCTTGCCTGTTCTCTCACAAAACAGCATATCAATTAAATAATG	natural antisense
ASHGA5P048185	0.0108844	3.38547	235.904	69.6814	7.65371	6.11553	104.762	105.529	59.2975	36.5224	42.2957	69.6814	187.289	217.978	190.151	255.964	328.141	235.904	7.22568	6.50375	7.47532	6.4222	7.63151	6.32566	7.75862	5.77995	8.17742	5.54608	P	P	P	P	P	P	P	P	P	P	noncoding	ENST00000545308	SNHG1	GENCODE	646	chr11	-	62621913	62622960	TATGAATAAGCTTCATTCCATCCTAATACCTTAAAATAACTAATTTGCTTTCCTTTCCAG	bidirectional
ASHGA5P048185	0.0108844	3.38547	235.904	69.6814	7.65371	6.11553	104.762	105.529	59.2975	36.5224	42.2957	69.6814	187.289	217.978	190.151	255.964	328.141	235.904	7.22568	6.50375	7.47532	6.4222	7.63151	6.32566	7.75862	5.77995	8.17742	5.54608	P	P	P	P	P	P	P	P	P	P	noncoding	ENST00000545308	SNHG1	GENCODE	646	chr11	-	62621913	62622960	TATGAATAAGCTTCATTCCATCCTAATACCTTAAAATAACTAATTTGCTTTCCTTTCCAG	bidirectional
ASHGA5P048185	0.0108844	3.38547	235.904	69.6814	7.65371	6.11553	104.762	105.529	59.2975	36.5224	42.2957	69.6814	187.289	217.978	190.151	255.964	328.141	235.904	7.22568	6.50375	7.47532	6.4222	7.63151	6.32566	7.75862	5.77995	8.17742	5.54608	P	P	P	P	P	P	P	P	P	P	noncoding	ENST00000545308	SNHG1	GENCODE	646	chr11	-	62621913	62622960	TATGAATAAGCTTCATTCCATCCTAATACCTTAAAATAACTAATTTGCTTTCCTTTCCAG	bidirectional
ASHGA5P035240	0.00038474	3.3734	168.097	49.83	7.15062	5.69874	70.3538	53.4802	39.5842	31.1245	54.6074	49.83	268.249	117.014	160.73	120.904	173.585	168.097	7.73114	5.87936	6.62184	5.4791	7.38452	5.72725	6.74761	5.49536	7.26801	5.91262	P	P	P	P	P	P	P	P	P	P	noncoding	ENST00000442293	AC068491.1	GENCODE	546	chr2	-	112186899	112237838	TTAAACAGCTACACCACCAGAAGCCGAGAGAGAGGCTGGAACATAGCCTTCCCTTTGGAG	intergenic
ASHGA5P042705	0.000557067	3.36906	166.768	49.4999	7.12148	5.65658	72.7305	63.7748	26.7441	37.4333	46.8168	49.4999	281.749	169.873	105.491	152.637	124.09	166.768	7.80583	5.93032	7.13817	5.72172	6.82096	5.10895	7.0539	5.8243	6.78854	5.69761	P	P	P	P	P	P	P	P	P	P	noncoding	ENST00000432358	RP11-732M18.3	GENCODE	424	chr6	+	158703294	158733390	CTGAGTATCTCCACGTTTAGGTGCACAAATACTATTTTGTGAAGATCTTAAATTTGTGGT	intergenic
ASHGA5P046099	0.0184795	3.3581	190.298	56.6685	7.12813	5.93782	49.1266	64.2156	58.519	70.422	41.0592	56.6685	201.698	111.243	88.7916	438.726	111.032	190.298	7.33387	5.29424	6.55524	5.73288	6.58322	6.30327	8.5309	6.8564	6.63741	5.50231	P	P	P	P	P	P	P	P	P	P	noncoding	ENST00000451781	RP11-706O15.5	GENCODE	490	chrX	-	3811332	3823750	AGATGGTGCTATCTGAGAAAGCCAATGGGAGCACCCTCCGTGGGTGCACAGAGGAAAGGA	intergenic
ASHGA5P051681	0.00779032	3.34904	137.941	41.188	6.86851	5.44644	48.1715	45.7023	48.3312	38.9822	24.7529	41.188	105.599	126.648	223.895	94.4944	139.066	137.941	6.38771	5.26642	6.72904	5.26188	7.87343	6.02192	6.40633	5.89642	6.94605	4.78558	P	P	P	P	P	P	P	P	P	P	noncoding	ENST00000422157	RP6-74O6.3	GENCODE	439	chr1	+	147496675	147498172	TTTTCCTCAGAAGAAGAGTTCCAAACAAAAGATCTACTACCCTGAGAAGCGGTGAAGTGC	intergenic
ASHGA5P017022	0.00225585	3.32376	2037.71	613.073	10.7307	9.42509	793.278	824.65	613.34	423.91	410.187	613.073	2300.94	1714.86	2270.71	1680.33	2221.69	2037.71	10.8084	9.60491	10.3964	9.36347	11.1217	9.61341	10.4153	9.55543	10.9119	8.98824	P	P	P	P	P	P	P	P	P	P	noncoding	ENST00000436764	RP4-564F22.2	GENCODE	973	chr20	-	37049234	37063976	ATCTGCGTGGGTCTCAGCCTTAGATCCAAGGACAGTCCAAGGAAGTCCTAAGACCATGGA	intergenic
ASHGA5P026488	0.0497257	3.30927	83.8856	25.3487	6.1501	4.63427	32.8748	23.3594	25.4334	33.9928	11.083	25.3487	84.706	51.5307	66.7762	64.2719	152.143	83.8856	6.07849	4.62167	5.53311	4.30603	6.18637	5.02915	5.87319	5.65848	7.07936	3.55602	P	P	P	P	P	P	P	P	P	P	noncoding	ENST00000538355	RP11-783K16.5	GENCODE	431	chr11	+	64014525	64015649	TGAGAATAGGGGCTATCTGAGAATGCAGGGGAGTGGACATCGTGTGCAGACAGGGAGTCT	bidirectional
ASHGA5P018822	0.028994	3.29592	607.709	184.382	8.86006	7.70795	223.573	212.225	161.419	148.037	176.658	184.382	612.394	1019.31	221.063	752.932	432.85	607.709	8.91048	7.68806	9.66785	7.41222	7.85743	7.73737	9.29006	7.99649	8.57447	7.70564	P	P	P	P	P	P	P	P	P	P	noncoding	ENST00000457991	RP11-277L2.2	GENCODE	603	chr1	+	149605700	149616657	TGCGCGTGACGGCCCGCCTGGCAGGACGACTGAGCAAGTTCTTGGAAAACCAGAGATATT	intergenic
ASHGA5P035988	0.0374164	3.28707	575.438	175.061	8.78007	7.59689	222.298	223.26	164.344	112.995	152.407	175.061	633.605	977.969	567.33	190.716	507.57	575.438	8.96703	7.67988	9.616	7.48042	9.16322	7.7608	7.35782	7.58629	8.79626	7.47708	P	P	P	P	P	P	M	P	P	P	noncoding	ENST00000443770	ANKRD36BP2	GENCODE	503	chr2	+	89065459	89073085	CATCTTCTGATTACCAGATTGAGTTTCTGCATGTGTGTGTGTATCTCTGATTAAAAATGA	intergenic
ASHGA5P040798	0.0492714	3.28244	1337.08	407.342	9.89054	8.84994	408.88	572.49	327.29	321.14	406.908	407.342	1572.97	1660.11	387.361	2307.44	757.497	1337.08	10.2487	8.59333	10.3494	8.8131	8.64616	8.72574	10.8553	9.13825	9.35315	8.9793	P	P	P	P	P	P	P	P	P	P	noncoding	uc001esl.4	LOC728855	UCSC_knowngene	836	chr1	+	149576452	149616786	TCTTTGTGCCGCCTTCACCCAGTGAAGGAGCCTGTATCCACCCTGCCCAGTCGCTGTTGG	intergenic
ASHGA5P050897	0.0223881	3.27694	2504.44	764.262	10.9425	9.71711	838.876	1229.83	772.064	445.265	535.275	764.262	1674.15	2520.55	1427.08	3007.98	3892.45	2504.44	10.3418	9.68698	10.9557	9.94585	10.4601	9.95529	11.2361	9.62301	11.7188	9.37444	P	P	P	P	P	P	P	P	P	P	noncoding	NR_027700	NOP56	RefSeq	2245	chr20	+	2633177	2639039	ATCCAGCATCCACAGTGCAGATCCTTGGGGCTGAAAAGGCCCTGTTCAGGTACCAGTGAG	exon sense-overlapping
ASHGA5P029637	0.000661202	3.27569	270.482	82.5723	7.85696	6.46627	98.8813	100.605	63.7422	51.5469	98.0861	82.5723	192.752	277.51	241.833	314.214	326.1	270.482	7.26492	6.40981	7.80794	6.35081	7.9868	6.41819	8.05622	6.35347	8.16895	6.79908	P	P	P	P	P	P	P	P	P	P	noncoding	ENST00000554032	RP6-65G23.3	GENCODE	368	chr14	+	71276921	71282108	TGTTCATTAGAACTCTGAAAACTACAGTTCTCCCCTTTATGAGGACTGCACCACAGCTCG	bidirectional
ASHGA5P029637	0.000661202	3.27569	270.482	82.5723	7.85696	6.46627	98.8813	100.605	63.7422	51.5469	98.0861	82.5723	192.752	277.51	241.833	314.214	326.1	270.482	7.26492	6.40981	7.80794	6.35081	7.9868	6.41819	8.05622	6.35347	8.16895	6.79908	P	P	P	P	P	P	P	P	P	P	noncoding	ENST00000554032	RP6-65G23.3	GENCODE	368	chr14	+	71276921	71282108	TGTTCATTAGAACTCTGAAAACTACAGTTCTCCCCTTTATGAGGACTGCACCACAGCTCG	bidirectional
ASHGA5P016266	0.00343485	3.25965	140.487	43.0988	6.92478	5.52101	54.4222	51.1316	41.3049	37.5175	31.1178	43.0988	125.073	140.883	203.417	100.842	132.219	140.487	6.63719	5.46264	6.88118	5.4184	7.73407	5.78771	6.49612	5.82826	6.87535	5.10804	P	M	P	P	P	P	P	M	P	P	noncoding	ENST00000428782	RP11-94I2.4	GENCODE	492	chr1	+	145952371	145956451	TTTCGGGAAGGGAAGAAGAGTTCCAAACAAAAGATCTACTACCCTGAGAAGCGGTGAAGT	intergenic
ASHGA5P015787	0.00132316	3.25557	1656.26	508.747	10.4269	9.13489	616.62	759.836	496.657	314.859	355.762	508.747	1953.93	1323.66	1791.3	1473.66	1738.74	1656.26	10.5654	9.22301	10.0226	9.23171	10.7781	9.33487	10.2276	9.10213	10.5408	8.78272	M	P	P	P	P	P	P	P	P	P	noncoding	uc002xij.3	LOC388796	UCSC_knowngene	805	chr20	-	37049238	37063962	TGCTTGTAAGGTCTCAGCCTTAGATCCAAGGACAGTCCAAGGAAGTCCTAAGACCATGGA	intergenic
ASHGA5P032981	0.0104385	3.23487	284.957	88.0892	7.81121	6.53618	133.769	105.578	44.3814	73.4072	83.3104	88.0892	509.546	173.972	175.435	193.135	372.699	284.957	8.64493	6.89872	7.17011	6.42312	7.50967	5.8894	7.37688	6.92085	8.35447	6.54879	P	P	P	P	P	P	M	P	P	P	noncoding	ENST00000579019	RP11-192H23.6	GENCODE	742	chr17	+	26935321	26936748	TTGAAATGCCAGCTTTTGAGACTTTTGAAAAATTCACAGGCTGGGTGTGGAGGCTCATGC	natural antisense
ASHGA5P031281	0.0174537	3.22437	7140.01	2214.39	12.4515	11.2595	3036.35	3099.83	2318	1266.03	1351.73	2214.39	7987.44	4967.06	10162.5	4025	8558.03	7140.01	12.5543	11.5755	11.9866	11.3096	13.2086	11.4981	11.6633	11.1606	12.8447	10.7539	P	P	P	P	P	P	P	P	P	P	noncoding	ENST00000422207	GAS5	GENCODE	643	chr1	-	173833041	173834044	GATGGGAGTGATTAGCTGTTTAAAAGTTAAAATGTGACTGAGAAGGAAATTGAGTAGGGC	intergenic
ASHGA5P036777	0.0325897	3.21794	516.805	160.601	8.75551	7.37461	194.23	237.318	179.423	128.129	63.9064	160.601	429.956	436.66	644.673	406.323	666.413	516.805	8.39771	7.47849	8.44165	7.56626	9.34531	7.88426	8.42456	7.79024	9.16833	6.15379	P	P	P	P	P	P	P	P	P	P	noncoding	uc002xig.3	LOC388796	UCSC_knowngene	2149	chr20	-	37049238	37063962	CTTTCTGTTAGGATTTTTTATTTGGTGTGCGTGAATGAGGAGCTTCGCCCTGCTTGAATG	intergenic
ASHGA5P054505	0.0497027	3.16882	295.175	93.1497	7.80984	6.34471	208.983	113.085	36.7181	78.8016	28.1607	93.1497	566.401	182.206	400.22	165.105	161.943	295.175	8.7976	7.58212	7.23583	6.51899	8.69227	5.6171	7.15854	7.03488	7.16498	4.97044	P	P	P	P	P	P	P	P	P	P	noncoding	ENST00000430963	RP11-773D16.1	GENCODE	555	chr10	-	81563812	81565878	AGAAAGACAGGTAAGTCATTTGTTAAAATCTCACTACTGTTGTTTAACAGAAACATATAT	intergenic
ASHGA5P014979	0.00485055	3.15712	504.533	159.808	8.59097	7.41068	160.439	144.744	209.094	73.2741	211.491	159.808	370.444	442.689	535.516	215.278	958.74	504.533	8.17831	7.19048	8.46172	6.85864	9.08835	8.10204	7.52306	6.9179	9.70338	7.98435	P	P	P	P	P	P	P	P	P	P	noncoding	uc021oga.1	BC038541	UCSC_knowngene	526	chr1	-	9740902	9747627	CCCCAACCTGTGCTCTCATCTCTTGCTCTGGGGTAAGCCAGTGGCCATGCTATAAGGACA	intronic antisense
ASHGA5P014885	0.0376341	3.14011	1146.18	365.013	9.74857	8.58561	481.729	588.513	262.066	160.836	331.923	365.013	762.969	1294.81	400.221	1524.74	1748.17	1146.18	9.23288	8.84628	9.99278	8.85712	8.69266	8.42557	10.2769	8.12752	10.5476	8.67157	P	M	P	P	P	P	P	P	P	P	noncoding	NR_047677	TARS	RefSeq	2714	chr5	+	33440881	33468196	GTGGAATTAGCCATGGAAAGAGTCTATGGTGGATGTTTATGCTACGGTCCGCCAATAGAA	exon sense-overlapping
ASHGA5P014885	0.0376341	3.14011	1146.18	365.013	9.74857	8.58561	481.729	588.513	262.066	160.836	331.923	365.013	762.969	1294.81	400.221	1524.74	1748.17	1146.18	9.23288	8.84628	9.99278	8.85712	8.69266	8.42557	10.2769	8.12752	10.5476	8.67157	P	M	P	P	P	P	P	P	P	P	noncoding	NR_047677	TARS	RefSeq	2714	chr5	+	33440881	33468196	GTGGAATTAGCCATGGAAAGAGTCTATGGTGGATGTTTATGCTACGGTCCGCCAATAGAA	exon sense-overlapping
ASHGA5P014885	0.0376341	3.14011	1146.18	365.013	9.74857	8.58561	481.729	588.513	262.066	160.836	331.923	365.013	762.969	1294.81	400.221	1524.74	1748.17	1146.18	9.23288	8.84628	9.99278	8.85712	8.69266	8.42557	10.2769	8.12752	10.5476	8.67157	P	M	P	P	P	P	P	P	P	P	noncoding	NR_047677	TARS	RefSeq	2714	chr5	+	33440881	33468196	GTGGAATTAGCCATGGAAAGAGTCTATGGTGGATGTTTATGCTACGGTCCGCCAATAGAA	exon sense-overlapping
ASHGA5P041887	0.0245076	3.10992	846.602	272.226	9.30325	8.25065	302.763	363.594	166.355	226.287	302.13	272.226	1257.84	700.676	302.982	587.053	1384.46	846.602	9.93497	8.14944	9.13083	8.17594	8.29993	7.77678	8.93807	8.6306	10.2125	8.52048	P	P	P	P	P	P	P	P	P	P	noncoding	uc003ped.4	GUSBP4	UCSC_knowngene	1530	chr6	-	58272359	58287724	CGCATCGGGACCGGACCCGCAGCTTGTGGTCACCATGGGCTTCACGGGGTTCGGGGTTCG	intergenic
ASHGA5P019442	0.0304057	3.10083	322.059	103.862	8.02226	6.76651	172.28	125.471	58.2317	71.8079	91.5216	103.862	293.89	221.631	315.154	196.459	583.162	322.059	7.86538	7.297	7.50315	6.66337	8.35755	6.29549	7.40422	6.89041	8.981	6.68627	P	P	M	P	P	P	P	P	P	P	noncoding	NR_045022	C17orf76-AS1	RefSeq	1067	chr17	+	16342300	16345340	TAGCCACGAGTCAAGTCTTCACCACTTGCTGGTTCCCAGGAGTAAACTTGTTTGAACGGT	natural antisense
ASHGA5P019442	0.0304057	3.10083	322.059	103.862	8.02226	6.76651	172.28	125.471	58.2317	71.8079	91.5216	103.862	293.89	221.631	315.154	196.459	583.162	322.059	7.86538	7.297	7.50315	6.66337	8.35755	6.29549	7.40422	6.89041	8.981	6.68627	P	P	M	P	P	P	P	P	P	P	noncoding	NR_045022	C17orf76-AS1	RefSeq	1067	chr17	+	16342300	16345340	TAGCCACGAGTCAAGTCTTCACCACTTGCTGGTTCCCAGGAGTAAACTTGTTTGAACGGT	natural antisense
ASHGA5P018694	0.0336208	3.07589	966.451	314.203	9.52419	8.4814	263.584	380.01	356.963	330.82	239.636	314.203	1292.87	620.948	464.081	1682.25	772.106	966.451	9.96657	7.94128	8.95344	8.23477	8.89814	8.86603	10.4181	9.1855	9.38467	8.17939	P	P	P	P	P	P	P	P	P	P	noncoding	ENST00000456563	RP11-706O15.3	GENCODE	793	chrX	-	3772389	3785176	AGAGTCAGCACGCGGTGGCCTGGGTGAACTGTCACCCCTACAACTCAGCTTGCAACCAGC	intergenic
ASHGA5P030691	0.00252187	3.07037	118.263	38.5174	6.6567	5.30407	49.5062	49.7695	26.4496	28.3731	38.4884	38.5174	89.5077	138.143	90.7785	87.7683	185.115	118.263	6.15404	5.30955	6.85017	5.3796	6.61241	5.0919	6.30225	5.32829	7.36465	5.411	P	P	P	P	P	P	P	P	P	P	noncoding	ENST00000561560	RP11-358L4.1	GENCODE	529	chr15	+	79705699	79706228	AGTGGCAGGTCTGATTTGGTTATAGAACTGGATACATCAGACAGTTTTAACTTTATGCTA	intergenic
ASHGA5P038402	0.0286916	3.06367	113.435	37.0261	6.43503	5.26664	48.6593	43.8376	39.5905	30.268	22.7748	37.0261	188.611	124.746	51.0865	159.918	42.8155	113.435	7.23762	5.28189	6.70785	5.20748	5.80557	5.72764	7.113	5.44916	5.31111	4.66702	P	P	P	P	P	P	P	P	P	P	noncoding	ENST00000567253	RP11-723O4.9	GENCODE	811	chr3	-	128578558	128579369	TGCACTGTCCTGAAGCAGGAAATATGAGAAAAACAAGTAAAGGGAAAACAAGTCCAGTTG	intergenic
ASHGA5P021303	0.0443866	3.0497	226.853	74.3853	7.4111	6.31067	72.4938	83.7657	77.3081	43.4962	94.8629	74.3853	338.839	126.493	101.882	140.472	426.578	226.853	8.05999	5.92612	6.72599	6.10602	6.77455	6.69417	6.94272	6.07961	8.55224	6.74744	P	P	P	P	P	P	P	P	P	P	noncoding	NR_033759	ATP5L	RefSeq	1396	chr11	+	118272103	118280562	CTGGTGAACGGCATTGGCAGTTCTGTTTGGAACTATCTCTTAGAGCTTTGTGTCTGCTTA	exon sense-overlapping
ASHGA5P040332	0.00570331	3.04836	461.438	151.373	8.57874	7.40358	154.494	206.756	140.887	115.089	139.638	151.373	444.434	639.153	282.406	372.566	568.632	461.438	8.45152	7.12545	9.00132	7.37443	8.19056	7.5525	8.3021	7.62379	8.94822	7.34173	P	P	M	P	P	P	P	P	P	P	noncoding	ENST00000561606	CTD-2256P15.2	GENCODE	901	chr5	-	10352812	10353713	GGGAGGGCTCTTCCCCCAATCTTCATCAAACAGAGTAAGGTTTAGAATAAAAATAATGAA	bidirectional
ASHGA5P040332	0.00570331	3.04836	461.438	151.373	8.57874	7.40358	154.494	206.756	140.887	115.089	139.638	151.373	444.434	639.153	282.406	372.566	568.632	461.438	8.45152	7.12545	9.00132	7.37443	8.19056	7.5525	8.3021	7.62379	8.94822	7.34173	P	P	M	P	P	P	P	P	P	P	noncoding	ENST00000561606	CTD-2256P15.2	GENCODE	901	chr5	-	10352812	10353713	GGGAGGGCTCTTCCCCCAATCTTCATCAAACAGAGTAAGGTTTAGAATAAAAATAATGAA	bidirectional
ASHGA5P040332	0.00570331	3.04836	461.438	151.373	8.57874	7.40358	154.494	206.756	140.887	115.089	139.638	151.373	444.434	639.153	282.406	372.566	568.632	461.438	8.45152	7.12545	9.00132	7.37443	8.19056	7.5525	8.3021	7.62379	8.94822	7.34173	P	P	M	P	P	P	P	P	P	P	noncoding	ENST00000561606	CTD-2256P15.2	GENCODE	901	chr5	-	10352812	10353713	GGGAGGGCTCTTCCCCCAATCTTCATCAAACAGAGTAAGGTTTAGAATAAAAATAATGAA	bidirectional
ASHGA5P041597	0.0327861	3.03834	94.8468	31.2166	6.07129	5.0414	40.1053	26.7545	33.3578	31.2469	24.6186	31.2166	76.1366	51.415	59.9224	248.863	37.897	94.8468	5.92096	4.96083	5.53096	4.50233	6.03643	5.46571	7.72169	5.50187	5.14643	4.77628	P	P	P	P	P	P	P	P	P	P	noncoding	ENST00000451823	HMGB3P22	pseudogene	552	chr5	+	179121197	179121749	TCTTCTTTGTGCAGACATGCAGAGAAGAATGTAAAAAGAAAAACCCTGTCAATTTTGCAG
ASHGA5P053397	0.0324107	3.02816	10231.4	3378.76	12.9248	11.8657	4561.02	4720.1	3788.14	1942.46	1882.1	3378.76	10438.2	7092.41	17467.2	5203.59	10955.8	10231.4	12.9587	12.1778	12.5073	11.9385	13.9528	12.2024	12.0427	11.7728	13.1627	11.2371	P	P	P	P	P	P	P	P	P	P	noncoding	ENST00000412059	GAS5	GENCODE	979	chr1	-	173833038	173837125	TTATCCTAAACTAGGTGAGTCAGCTTTTGGTACATGTGATGATTTTCAGTGTAACCAATG	bidirectional
ASHGA5P053397	0.0324107	3.02816	10231.4	3378.76	12.9248	11.8657	4561.02	4720.1	3788.14	1942.46	1882.1	3378.76	10438.2	7092.41	17467.2	5203.59	10955.8	10231.4	12.9587	12.1778	12.5073	11.9385	13.9528	12.2024	12.0427	11.7728	13.1627	11.2371	P	P	P	P	P	P	P	P	P	P	noncoding	ENST00000412059	GAS5	GENCODE	979	chr1	-	173833038	173837125	TTATCCTAAACTAGGTGAGTCAGCTTTTGGTACATGTGATGATTTTCAGTGTAACCAATG	bidirectional
ASHGA5P053396	0.0247627	3.02313	13596.1	4497.37	13.3566	12.2935	5826.43	5978.15	5310.48	2650.14	2721.66	4497.37	13963.7	9904.5	22247.7	6757.65	15107.1	13596.1	13.4336	12.5345	13.0129	12.2836	14.3375	12.6894	12.4199	12.2233	13.5791	11.7365	P	P	P	P	P	P	P	P	P	P	noncoding	ENST00000454813	GAS5	GENCODE	621	chr1	-	173833039	173834009	GATTCTGAGGTTACTCTACTAACAAGCATCACACATTTGTATTTTGCCCTGATTAATATG	intergenic
ASHGA5P040298	0.0105381	3.02025	15763.3	5219.19	13.6167	12.5798	6445.98	5946.69	4992.16	3779.56	4931.54	5219.19	13846.6	12418.9	9753.32	17128.7	25668.8	15763.3	13.4206	12.6962	13.336	12.2739	13.1308	12.5965	13.7197	12.7255	14.4765	12.6071	P	P	P	P	P	P	P	P	P	P	noncoding	uc003jcv.3	LOC728613	UCSC_knowngene	1205	chr5	-	1628800	1634120	GAAAAAGACTGTTCTCTGCCCTTCTTTTTGCAATAAAATGTTACAAACTATCTTGAGTTT	intergenic
ASHGA5P033151	0.000878448	3.01485	611.461	202.816	9.0009	7.74593	170.477	356.461	221.098	131.922	134.123	202.816	537.549	885.862	561.476	509.818	562.601	611.461	8.72061	7.28123	9.45887	8.1485	9.14982	8.18543	8.74416	7.83413	8.93104	7.28033	P	P	P	M	P	P	P	P	M	P	noncoding	NR_026680	MGC57346	RefSeq	2110	chr17	+	43697711	43715329	GGTGCAAAGAGGCTCAGATTGGAACTTTTCCCTGAAACTATATTGTAGCCCAGAGTTCCT	exon sense-overlapping
ASHGA5P032881	0.0313989	3.00583	453.704	150.942	8.49088	7.29417	266.791	177.198	78.47	96.6149	135.635	150.942	441.561	327.41	375.718	267.688	856.145	453.704	8.44366	7.96145	8.04333	7.15147	8.60655	6.71498	7.8173	7.34549	9.54357	7.29746	P	P	P	P	P	P	P	P	P	P	noncoding	NR_045029	C17orf76-AS1	RefSeq	1023	chr17	+	16342300	16345340	CTTGCTGGTTCCCAGGAGTAAACTTGTTTGAACGGTGACCTAATTGCTATATTCACCTAG	natural antisense
ASHGA5P032881	0.0313989	3.00583	453.704	150.942	8.49088	7.29417	266.791	177.198	78.47	96.6149	135.635	150.942	441.561	327.41	375.718	267.688	856.145	453.704	8.44366	7.96145	8.04333	7.15147	8.60655	6.71498	7.8173	7.34549	9.54357	7.29746	P	P	P	P	P	P	P	P	P	P	noncoding	NR_045029	C17orf76-AS1	RefSeq	1023	chr17	+	16342300	16345340	CTTGCTGGTTCCCAGGAGTAAACTTGTTTGAACGGTGACCTAATTGCTATATTCACCTAG	natural antisense
ASHGA5P035520	0.0444864	3.00448	597.261	198.79	8.89249	7.78281	161.143	307.598	152.231	195.225	177.753	198.79	830.114	868.971	307.452	375.519	604.248	597.261	9.35908	7.19743	9.43104	7.93735	8.32215	7.65733	8.31294	8.40666	9.03726	7.71528	P	P	P	P	P	P	P	P	P	P	noncoding	TCONS_00004289	XLOC_002133	LincRNAs identified by Cabili et al	360	chr2	-	65282663	65283317	AGGCTCTCCGAACGCCTTTCACTGTGTTTCTGTTTACATTCGCGTCTGCAAGACCCGGCG	intergenic
ASHGA5P025709	0.0169274	3.00222	152.056	50.6478	6.94871	5.71092	62.4375	76.3548	43.7049	35.6174	35.1246	50.6478	200.546	139.037	59.6986	219.579	141.417	152.056	7.32609	5.68852	6.86083	5.97693	6.03264	5.86782	7.5515	5.73738	6.97247	5.28393	P	P	P	P	P	P	P	P	P	P	noncoding	NR_027405	MTHFD2	RefSeq	2306	chr2	+	74425689	74442424	CGGCAGTTCGGGGAATCTCTCCCTAGGTCAGGTTGGAGTGCAGTGCTGCAATCACGGCTT	exon sense-overlapping
ASHGA5P031950	0.00771245	2.98301	255.439	85.6313	7.50555	6.16236	158.658	158.693	48.3814	36.9857	25.4376	85.6313	540.011	271.382	272.743	99.5994	93.4576	255.439	8.72519	7.16954	7.77395	6.98929	8.1485	6.02413	6.47879	5.80337	6.4013	4.82546	P	P	P	P	P	P	P	P	P	P	noncoding	NR_045112	LOC100129617	RefSeq	1926	chr16	+	81698958	81700879	CACGGATGAGCAAACTGAAGCTTTGAGAGTCTCAAAGAATGTTCTTTACTAGACTGAAAT	intron sense-overlapping
ASHGA5P031950	0.00771245	2.98301	255.439	85.6313	7.50555	6.16236	158.658	158.693	48.3814	36.9857	25.4376	85.6313	540.011	271.382	272.743	99.5994	93.4576	255.439	8.72519	7.16954	7.77395	6.98929	8.1485	6.02413	6.47879	5.80337	6.4013	4.82546	P	P	P	P	P	P	P	P	P	P	noncoding	NR_045112	LOC100129617	RefSeq	1926	chr16	+	81698958	81700879	CACGGATGAGCAAACTGAAGCTTTGAGAGTCTCAAAGAATGTTCTTTACTAGACTGAAAT	intron sense-overlapping
ASHGA5P025993	0.00540234	2.97036	409.013	137.698	8.36431	7.25378	153.51	177.618	114.781	94.7254	147.855	137.698	334.01	405.554	265.595	310.661	729.245	409.013	8.03749	7.11266	8.3367	7.1554	8.11016	7.2552	8.04126	7.31479	9.29595	7.43087	P	P	P	P	P	P	P	P	P	P	noncoding	NR_049741	SIKE1	RefSeq	5569	chr1	-	115312104	115323308	GGAGAGCGAGTATCAAGAGGATGCATCCGATATGAAGGACATGTCCAAATACAAACCTCA	exon sense-overlapping
ASHGA5P025993	0.00540234	2.97036	409.013	137.698	8.36431	7.25378	153.51	177.618	114.781	94.7254	147.855	137.698	334.01	405.554	265.595	310.661	729.245	409.013	8.03749	7.11266	8.3367	7.1554	8.11016	7.2552	8.04126	7.31479	9.29595	7.43087	P	P	P	P	P	P	P	P	P	P	noncoding	NR_049741	SIKE1	RefSeq	5569	chr1	-	115312104	115323308	GGAGAGCGAGTATCAAGAGGATGCATCCGATATGAAGGACATGTCCAAATACAAACCTCA	exon sense-overlapping
ASHGA5P026006	0.000276388	2.96818	1497.82	504.627	10.2859	9.1113	442.714	782.574	574.448	279.715	443.684	504.627	1229.94	1596.08	1449.01	1390.5	1823.58	1497.82	9.90052	8.72083	10.2932	9.282	10.4804	9.52523	10.1379	8.92483	10.6177	9.1036	P	P	P	P	P	P	P	P	P	P	noncoding	NR_052023	EIF6	RefSeq	1128	chr20	-	33866708	33872619	ATGTGTGTGGGCACGGTCTCCTGGTACCCAACAATACCACCGACCAGGAGCTGCAACACA	exon sense-overlapping
ASHGA5P026006	0.000276388	2.96818	1497.82	504.627	10.2859	9.1113	442.714	782.574	574.448	279.715	443.684	504.627	1229.94	1596.08	1449.01	1390.5	1823.58	1497.82	9.90052	8.72083	10.2932	9.282	10.4804	9.52523	10.1379	8.92483	10.6177	9.1036	P	P	P	P	P	P	P	P	P	P	noncoding	NR_052023	EIF6	RefSeq	1128	chr20	-	33866708	33872619	ATGTGTGTGGGCACGGTCTCCTGGTACCCAACAATACCACCGACCAGGAGCTGCAACACA	exon sense-overlapping
ASHGA5P026006	0.000276388	2.96818	1497.82	504.627	10.2859	9.1113	442.714	782.574	574.448	279.715	443.684	504.627	1229.94	1596.08	1449.01	1390.5	1823.58	1497.82	9.90052	8.72083	10.2932	9.282	10.4804	9.52523	10.1379	8.92483	10.6177	9.1036	P	P	P	P	P	P	P	P	P	P	noncoding	NR_052023	EIF6	RefSeq	1128	chr20	-	33866708	33872619	ATGTGTGTGGGCACGGTCTCCTGGTACCCAACAATACCACCGACCAGGAGCTGCAACACA	exon sense-overlapping
ASHGA5P026006	0.000276388	2.96818	1497.82	504.627	10.2859	9.1113	442.714	782.574	574.448	279.715	443.684	504.627	1229.94	1596.08	1449.01	1390.5	1823.58	1497.82	9.90052	8.72083	10.2932	9.282	10.4804	9.52523	10.1379	8.92483	10.6177	9.1036	P	P	P	P	P	P	P	P	P	P	noncoding	NR_052023	EIF6	RefSeq	1128	chr20	-	33866708	33872619	ATGTGTGTGGGCACGGTCTCCTGGTACCCAACAATACCACCGACCAGGAGCTGCAACACA	exon sense-overlapping
ASHGA5P016574	0.00264701	2.95126	234.336	79.4018	7.66018	6.36417	109.662	104.785	44.7923	49.5885	88.1811	79.4018	223.825	190.968	215.891	220.331	320.664	234.336	7.48577	6.57802	7.2943	6.41225	7.82566	5.90442	7.55655	6.29388	8.13863	6.63226	P	P	P	P	P	P	P	P	P	P	noncoding	ENST00000431812	RP4-669L17.4	GENCODE	336	chr1	+	329783	334271	TCTGAGCCAGCTGCAGGACAAGTTCGAGCATCTTAAAATGATTCAACAGGAGGAGATAAG	intergenic
ASHGA5P036782	0.0208401	2.94951	222.024	75.275	7.55654	6.32219	59.7526	102.374	94.735	57.5517	61.9621	75.275	238.98	210.982	193.567	141.506	325.085	222.024	7.57852	5.61636	7.4323	6.37767	7.65828	6.98516	6.95083	6.53122	8.16276	6.10053	P	P	P	P	P	P	P	P	P	P	noncoding	ENST00000570096	RP4-616B8.4	GENCODE	187	chr20	-	37590567	37590754	GCACTGGGCGTTGAAGCAGTGCTTTCTGGATTAAATACGAAATACTGATGTCACAAGCTA	bidirectional
ASHGA5P036782	0.0208401	2.94951	222.024	75.275	7.55654	6.32219	59.7526	102.374	94.735	57.5517	61.9621	75.275	238.98	210.982	193.567	141.506	325.085	222.024	7.57852	5.61636	7.4323	6.37767	7.65828	6.98516	6.95083	6.53122	8.16276	6.10053	P	P	P	P	P	P	P	P	P	P	noncoding	ENST00000570096	RP4-616B8.4	GENCODE	187	chr20	-	37590567	37590754	GCACTGGGCGTTGAAGCAGTGCTTTCTGGATTAAATACGAAATACTGATGTCACAAGCTA	bidirectional
ASHGA5P036083	0.00424319	2.93337	1054.52	359.491	9.52364	8.48857	441.714	222.479	529.835	112.408	491.021	359.491	1464.18	389.791	1027.89	419.782	1970.97	1054.52	10.1368	8.71722	8.28188	7.4758	10.001	9.41981	8.46773	7.57852	10.7308	9.25149	M	P	P	P	P	P	P	P	P	P	noncoding	TCONS_00027643	XLOC_013182	LincRNAs identified by Cabili et al	460	chr19	+	58787664	58788877	CTGTTCCCTGCTATGTGTCTGGCTCTTGGTAAAATTTAAAAAAGTTAAAAATTGTTGTGG	intergenic
ASHGA5P021725	0.0264956	2.93214	1089.32	371.511	9.81612	8.64824	500.915	465.025	455.453	226.862	209.302	371.511	941.86	1122	757.853	1140.26	1484.64	1089.32	9.52843	8.90247	9.79417	8.52351	9.58352	9.21154	9.86635	8.63597	10.3081	7.9677	P	P	P	P	P	P	P	P	P	P	noncoding	ENST00000539303	SNHG1	GENCODE	240	chr11	-	62621044	62622646	TCAGAGCTGAGAGCTTTGTTTTTCTCTAGGTACTACTAACCAATAACCTGCTTGGCTCAA	bidirectional
ASHGA5P021725	0.0264956	2.93214	1089.32	371.511	9.81612	8.64824	500.915	465.025	455.453	226.862	209.302	371.511	941.86	1122	757.853	1140.26	1484.64	1089.32	9.52843	8.90247	9.79417	8.52351	9.58352	9.21154	9.86635	8.63597	10.3081	7.9677	P	P	P	P	P	P	P	P	P	P	noncoding	ENST00000539303	SNHG1	GENCODE	240	chr11	-	62621044	62622646	TCAGAGCTGAGAGCTTTGTTTTTCTCTAGGTACTACTAACCAATAACCTGCTTGGCTCAA	bidirectional
ASHGA5P021725	0.0264956	2.93214	1089.32	371.511	9.81612	8.64824	500.915	465.025	455.453	226.862	209.302	371.511	941.86	1122	757.853	1140.26	1484.64	1089.32	9.52843	8.90247	9.79417	8.52351	9.58352	9.21154	9.86635	8.63597	10.3081	7.9677	P	P	P	P	P	P	P	P	P	P	noncoding	ENST00000539303	SNHG1	GENCODE	240	chr11	-	62621044	62622646	TCAGAGCTGAGAGCTTTGTTTTTCTCTAGGTACTACTAACCAATAACCTGCTTGGCTCAA	bidirectional
ASHGA5P019079	0.0035194	2.8999	607.66	209.545	8.99262	7.86781	234.895	299.306	181.229	157.826	174.471	209.545	406.644	734.549	581.713	600.584	714.811	607.66	8.32039	7.76813	9.20307	7.89053	9.20191	7.90162	8.96987	8.09434	9.26786	7.68445	P	P	P	P	P	P	P	P	P	P	noncoding	NR_024250	FAM86JP	RefSeq	1970	chr3	+	125635443	125648867	ACCGAGCTAGGCCAGGCCAGGATCAGATGGGAAGTGGAACCTCGTCATGACCAGAAACTG	natural antisense
ASHGA5P019079	0.0035194	2.8999	607.66	209.545	8.99262	7.86781	234.895	299.306	181.229	157.826	174.471	209.545	406.644	734.549	581.713	600.584	714.811	607.66	8.32039	7.76813	9.20307	7.89053	9.20191	7.90162	8.96987	8.09434	9.26786	7.68445	P	P	P	P	P	P	P	P	P	P	noncoding	NR_024250	FAM86JP	RefSeq	1970	chr3	+	125635443	125648867	ACCGAGCTAGGCCAGGCCAGGATCAGATGGGAAGTGGAACCTCGTCATGACCAGAAACTG	natural antisense
ASHGA5P019191	0.0194955	2.89282	778.113	268.981	9.26377	8.1164	447.824	234.303	121.414	151.921	389.44	268.98	953.321	596.843	699.572	381.424	1259.4	778.113	9.54453	8.74226	8.89512	7.5525	9.46625	7.33682	8.33389	8.03749	10.0791	8.91292	P	P	P	P	P	P	P	P	P	P	noncoding	ENST00000472293	C17orf76-AS1	GENCODE	1177	chr17	+	16342351	16345332	CCAAGAGAAGATTGAAATGTAGTTTCTTTGCAGGTTATATTCCCAGAGGATGTCAGTCCC	natural antisense
ASHGA5P019191	0.0194955	2.89282	778.113	268.981	9.26377	8.1164	447.824	234.303	121.414	151.921	389.44	268.98	953.321	596.843	699.572	381.424	1259.4	778.113	9.54453	8.74226	8.89512	7.5525	9.46625	7.33682	8.33389	8.03749	10.0791	8.91292	P	P	P	P	P	P	P	P	P	P	noncoding	ENST00000472293	C17orf76-AS1	GENCODE	1177	chr17	+	16342351	16345332	CCAAGAGAAGATTGAAATGTAGTTTCTTTGCAGGTTATATTCCCAGAGGATGTCAGTCCC	natural antisense
ASHGA5P036934	0.0031244	2.86651	98.8234	34.4752	6.41669	5.17983	42.185	41.2782	32.7883	30.0151	26.1094	34.4752	90.7588	89.3147	60.9695	143.733	109.341	98.8234	6.1735	5.04634	6.25877	5.1236	6.06183	5.43569	6.97379	5.43081	6.61556	4.8627	P	P	P	P	P	P	P	P	P	P	noncoding	NR_028370	PCNA-AS1	RefSeq	384	chr20	+	5100231	5100615	TGAGACCTAGAAAGACAACGACCACTCTGCTACGCCTGCAACCGTTTAATGCCGCCGCGT	natural antisense
ASHGA5P036934	0.0031244	2.86651	98.8234	34.4752	6.41669	5.17983	42.185	41.2782	32.7883	30.0151	26.1094	34.4752	90.7588	89.3147	60.9695	143.733	109.341	98.8234	6.1735	5.04634	6.25877	5.1236	6.06183	5.43569	6.97379	5.43081	6.61556	4.8627	P	P	P	P	P	P	P	P	P	P	noncoding	NR_028370	PCNA-AS1	RefSeq	384	chr20	+	5100231	5100615	TGAGACCTAGAAAGACAACGACCACTCTGCTACGCCTGCAACCGTTTAATGCCGCCGCGT	natural antisense
ASHGA5P019447	0.00519766	2.84933	2406.67	844.645	10.9252	9.92295	904.467	1206.41	728.458	634.772	749.115	844.645	3476.45	2062.78	1438.54	2515.95	2539.62	2406.67	11.4085	9.80564	10.6656	9.91888	10.4724	9.86485	10.9795	10.1421	11.0998	9.88326	P	P	P	P	P	P	P	P	P	P	noncoding	ENST00000485041	TUBA4B	GENCODE	1131	chr2	+	220117964	220136733	CCCTGTCCAGGCAGCATGAGCAGCTCATCACAGGCAAGGAAGATGCTGCCAATAACTATG	intronic antisense
ASHGA5P015537	0.0165834	2.84225	794.443	279.512	9.39335	8.24651	224.882	460.609	300.965	217.604	193.5	279.512	937.002	676.259	832.527	622.343	904.086	794.443	9.52189	7.69538	9.07907	8.50662	9.7236	8.61572	9.01747	8.56566	9.62469	7.84919	P	P	P	P	P	P	P	P	P	P	noncoding	ENST00000421140	NSUN5P1	pseudogene	1535	chr7	+	75039650	75045876	TGGATCCTTCCTGCAGTGGCTCGGGTGAGATGGTATGCCGAGCAGACAGCTGGAGGATCC
ASHGA5P039751	0.020448	2.8341	405.91	143.224	8.33641	7.28083	177.558	202.36	112.16	86.7529	137.287	143.224	310.356	583.913	349.103	193.369	592.807	405.91	7.9378	7.34749	8.8584	7.34458	8.50319	7.21885	7.37907	7.1779	9.0036	7.31534	M	P	P	P	P	P	P	P	P	P	noncoding	ENST00000508156	AF146191.4	GENCODE	517	chr4	-	190742634	190860896	CTGTTGAAGCTCAATAATCACATTACTGCGGACCTCCAAAATTTTACAAAGGACTGCATA	intergenic
ASHGA5P044594	0.000887938	2.83165	1050.55	371.001	9.78951	8.70612	273.147	538.198	374.815	306.638	362.208	371.001	931.548	1183.64	1009.23	1227.81	900.498	1050.55	9.51361	7.99392	9.86201	8.73068	9.97943	8.93761	9.97347	9.06014	9.61904	8.80824	P	P	M	P	P	P	P	P	P	P	noncoding	ENST00000524499	CTD-3065J16.9	GENCODE	1264	chr8	-	145132904	145134168	GTATGTCTGTTTATCTCTTGCCACTTAACCTCAGCGGCTTCAAATAATAAAAATCATTCT	natural antisense
ASHGA5P025705	0.00225391	2.82375	358.258	126.873	8.24332	7.09032	147.881	182.865	111.869	69.905	121.845	126.873	311.24	429.851	250.359	459.497	340.344	358.258	7.94204	7.05408	8.42103	7.2016	8.02751	7.21447	8.59649	6.84598	8.22949	7.13546	P	P	M	P	P	P	P	P	P	P	noncoding	NR_027280	SAE1	RefSeq	2587	chr19	+	47634114	47713893	GAGCGGGAAGGCTGCGGGCCTCTCGGGTGCTTCTTGTCGGCTTGAAAGGACTTGGGGCTG	exon sense-overlapping
ASHGA5P025705	0.00225391	2.82375	358.258	126.873	8.24332	7.09032	147.881	182.865	111.869	69.905	121.845	126.873	311.24	429.851	250.359	459.497	340.344	358.258	7.94204	7.05408	8.42103	7.2016	8.02751	7.21447	8.59649	6.84598	8.22949	7.13546	P	P	M	P	P	P	P	P	P	P	noncoding	NR_027280	SAE1	RefSeq	2587	chr19	+	47634114	47713893	GAGCGGGAAGGCTGCGGGCCTCTCGGGTGCTTCTTGTCGGCTTGAAAGGACTTGGGGCTG	exon sense-overlapping
ASHGA5P025705	0.00225391	2.82375	358.258	126.873	8.24332	7.09032	147.881	182.865	111.869	69.905	121.845	126.873	311.24	429.851	250.359	459.497	340.344	358.258	7.94204	7.05408	8.42103	7.2016	8.02751	7.21447	8.59649	6.84598	8.22949	7.13546	P	P	M	P	P	P	P	P	P	P	noncoding	NR_027280	SAE1	RefSeq	2587	chr19	+	47634114	47713893	GAGCGGGAAGGCTGCGGGCCTCTCGGGTGCTTCTTGTCGGCTTGAAAGGACTTGGGGCTG	exon sense-overlapping
ASHGA5P037571	0.0213183	2.82327	1299.4	460.247	9.99873	9.02787	583.453	579.615	451.987	323.47	362.712	460.247	2236.56	900.762	1254.21	748.613	1356.85	1299.4	10.7612	9.14375	9.48819	8.8329	10.2799	9.20152	9.27973	9.14914	10.1847	8.81204	P	P	M	P	P	P	P	P	P	P	noncoding	uc010gsl.3	PI4KAP1	UCSC_knowngene	1923	chr22	-	20387885	20427815	TCTACCCACACCCTGCTCTCCTCAGTCATCCTTTGTTAAGGGTTAAAACCAGGGCACCTG	intergenic
ASHGA5P037297	0.04311	2.8022	85.3067	30.4428	5.94996	4.95526	22.304	38.1053	26.4574	39.8674	25.48	30.4428	69.9269	46.8642	61.8363	215.666	32.2403	85.3067	5.80557	3.91439	5.40745	5.00993	6.07961	5.09261	7.52599	5.93111	4.93116	4.82828	P	P	P	P	P	P	P	P	P	P	noncoding	ENST00000457669	AP000696.2	GENCODE	1133	chr21	-	38004978	38009331	ATGGGTTTATCTTTTGGGACCAAGACATTGGGTCCCTACATGTTTTCCCCTACCCTTCTT	intergenic
ASHGA5P044811	0.0497476	2.79521	374.046	133.817	8.28845	7.20362	104.902	160.52	170.26	127.225	106.177	133.817	428.471	473.301	261.956	261.289	445.214	374.046	8.39235	6.50632	8.5632	7.00428	8.08992	7.80703	7.78519	7.77984	8.6116	6.92065	P	P	P	P	P	P	M	P	P	P	noncoding	ENST00000520357	RP11-110G21.1	GENCODE	575	chr8	+	52812274	52825698	GGCGAGCCGGGAAAATATTGCTACTAAGGATCCTAAGCAGTGAACATGCTGTTAATACTT	bidirectional
ASHGA5P043733	0.00652262	2.79335	323.599	115.846	8.0924	6.97959	123.158	170.326	97.9391	104.249	83.5609	115.846	267.643	258.997	250.685	438.742	401.93	323.599	7.72664	6.7608	7.7109	7.09042	8.02978	7.03488	8.5312	7.4592	8.4635	6.55263	P	P	P	P	P	P	P	M	P	P	noncoding	ENST00000417840	AC118138.2	pseudogene	808	chr7	+	74765954	74789271	GAGCCTGTGGACGTGGCATGTGGCGTGGACCACATGGTGACCCTGGCCAAGTCATTCATC
ASHGA5P048652	0.01475	2.78398	129.494	46.5139	6.76166	5.61097	46.6807	62.1898	46.5131	32.3603	44.8258	46.5139	148.66	189.97	61.57	113.742	133.528	129.494	6.89229	5.21383	7.28884	5.68421	6.07516	5.95985	6.66603	5.56187	6.88597	5.63511	P	P	P	P	P	P	P	P	P	P	noncoding	ENST00000559368	OIP5-AS1	GENCODE	642	chr15	+	41576205	41580469	GGCGGAGTAAGGCGTGCCGCTGCAAACTGGCCTCTGGGCCGGGGGCGAGCAGCCCCCGGG	intergenic
ASHGA5P033015	0.00302512	2.78101	358.816	129.024	8.13576	7.02098	239.687	149.874	103.179	58.9561	93.4228	129.024	639.876	421.802	241.04	163.873	327.491	358.816	8.98132	7.79691	8.39308	6.90952	7.98229	7.10685	7.14724	6.57075	8.17487	6.72088	P	P	M	M	P	P	P	M	M	P	noncoding	ENST00000582557	SUZ12P1	GENCODE	1560	chr17	+	29061080	29097068	GCGTGATTTCCATAGCAGATGACAAGTTTATATTGATTATAACATGGTCTCGGTTGATAT	intergenic
ASHGA5P032880	0.0458726	2.77743	314.435	113.211	7.97818	6.86527	206.251	129.243	60.2621	75.6135	94.6829	113.211	294.792	192.928	284.641	217	582.812	314.435	7.86975	7.56714	7.30485	6.70053	8.20237	6.3462	7.53464	6.96833	8.9793	6.74416	P	P	P	P	P	P	P	P	P	P	noncoding	ENST00000578757	C17orf76-AS1	GENCODE	920	chr17	+	16342351	16344523	GTTAAGAAATGTCTCCAGTAGCAGGGTTAGCTTAAGTTTCAGGTAGGGTCTAGATCTGCG	intergenic
ASHGA5P021825	0.0490105	2.77489	6615.33	2383.99	12.4018	11.3361	2778.89	3429.65	3125.45	1473.95	1112.03	2383.99	5423.43	6541.14	4650.05	7021.1	9440.92	6615.33	12.0478	11.4457	12.3986	11.4551	12.1401	11.9088	12.4654	11.3867	12.9568	10.4844	P	P	P	P	P	P	P	P	P	P	noncoding	ENST00000541615	SNHG1	GENCODE	748	chr11	-	62619761	62622960	ATAAAAAATGGACATCAGAAGGTGAATTTTCCAAGTTCTTGGACAACCTAGCTGTTGAAA	bidirectional
ASHGA5P021825	0.0490105	2.77489	6615.33	2383.99	12.4018	11.3361	2778.89	3429.65	3125.45	1473.95	1112.03	2383.99	5423.43	6541.14	4650.05	7021.1	9440.92	6615.33	12.0478	11.4457	12.3986	11.4551	12.1401	11.9088	12.4654	11.3867	12.9568	10.4844	P	P	P	P	P	P	P	P	P	P	noncoding	ENST00000541615	SNHG1	GENCODE	748	chr11	-	62619761	62622960	ATAAAAAATGGACATCAGAAGGTGAATTTTCCAAGTTCTTGGACAACCTAGCTGTTGAAA	bidirectional
ASHGA5P021825	0.0490105	2.77489	6615.33	2383.99	12.4018	11.3361	2778.89	3429.65	3125.45	1473.95	1112.03	2383.99	5423.43	6541.14	4650.05	7021.1	9440.92	6615.33	12.0478	11.4457	12.3986	11.4551	12.1401	11.9088	12.4654	11.3867	12.9568	10.4844	P	P	P	P	P	P	P	P	P	P	noncoding	ENST00000541615	SNHG1	GENCODE	748	chr11	-	62619761	62622960	ATAAAAAATGGACATCAGAAGGTGAATTTTCCAAGTTCTTGGACAACCTAGCTGTTGAAA	bidirectional
ASHGA5P037726	0.0199053	2.77039	187.132	67.5472	7.30341	6.21178	64.7891	82.0705	68.742	59.402	62.7323	67.5472	291.118	188.027	114.863	175.955	165.697	187.132	7.854	5.74733	7.27545	6.07516	6.93688	6.52919	7.24933	6.58496	7.20138	6.12227	P	P	P	P	P	P	P	P	P	P	noncoding	uc003bcm.3	BC038245	UCSC_knowngene	1076	chr22	-	42760534	42765180	GTTTTCAGGTTTCTGCCTGACATTTAATATCACAAACATTGAGCCTGCTCCTGTCCCCCA	intergenic
ASHGA5P036625	0.0197833	2.7654	91.4827	33.0812	6.29197	5.11452	35.6826	42.0679	33.34	30.3663	23.949	33.0812	113.749	100.177	44.2507	90.4471	108.789	91.4827	6.49793	4.76418	6.4126	5.15021	5.60089	5.46466	6.34155	5.45451	6.6069	4.73907	P	P	P	P	P	P	P	P	P	P	noncoding	uc002wjz.2	BC012193	UCSC_knowngene	1316	chr20	-	3867915	3869231	CTTATCCAGAAGCACAAAGCCTAAAGAATGACAGAGCTTGGACTCCTGAGAAGTTCAGCT	bidirectional
ASHGA5P036625	0.0197833	2.7654	91.4827	33.0812	6.29197	5.11452	35.6826	42.0679	33.34	30.3663	23.949	33.0812	113.749	100.177	44.2507	90.4471	108.789	91.4827	6.49793	4.76418	6.4126	5.15021	5.60089	5.46466	6.34155	5.45451	6.6069	4.73907	P	P	P	P	P	P	P	P	P	P	noncoding	uc002wjz.2	BC012193	UCSC_knowngene	1316	chr20	-	3867915	3869231	CTTATCCAGAAGCACAAAGCCTAAAGAATGACAGAGCTTGGACTCCTGAGAAGTTCAGCT	bidirectional
ASHGA5P019060	0.00751237	2.76474	3775.97	1365.76	11.5457	10.6277	1155.16	1890.8	1324.03	978.753	1480.07	1365.76	2865.48	3177.91	3034.13	3112.12	6690.22	3775.97	11.1229	10.1916	11.3159	10.5789	11.52	10.7087	11.2911	10.7806	12.4785	10.8786	P	P	P	P	P	M	P	P	P	P	noncoding	NR_049742	SIKE1	RefSeq	5401	chr1	-	115312104	115323308	TCCGGACCAGAGCTATGGATTTCCTTGGAGGAACACCAGGATGCTTTGGAACTTATCATG	exon sense-overlapping
ASHGA5P019060	0.00751237	2.76474	3775.97	1365.76	11.5457	10.6277	1155.16	1890.8	1324.03	978.753	1480.07	1365.76	2865.48	3177.91	3034.13	3112.12	6690.22	3775.97	11.1229	10.1916	11.3159	10.5789	11.52	10.7087	11.2911	10.7806	12.4785	10.8786	P	P	P	P	P	M	P	P	P	P	noncoding	NR_049742	SIKE1	RefSeq	5401	chr1	-	115312104	115323308	TCCGGACCAGAGCTATGGATTTCCTTGGAGGAACACCAGGATGCTTTGGAACTTATCATG	exon sense-overlapping
ASHGA5P037756	0.0208159	2.76045	141.85	51.3866	6.82717	5.67545	36.333	93.5549	52.1607	37.4642	37.4205	51.3866	133.661	281.484	78.1898	94.8982	121.018	141.85	6.72924	4.79412	7.82644	6.24813	6.41189	6.13617	6.41175	5.82569	6.75652	5.37315	P	P	P	P	P	P	P	P	P	P	noncoding	NR_024009	CN5H6.4	RefSeq	1532	chr22	-	46691039	46692557	ATCATGTCAGCACATAGTAGGTGTGGCCTATGTATGGCAGATTCATTTCTGCCCCCAATA	bidirectional
ASHGA5P027721	0.0252498	2.75703	100.745	36.541	6.35991	5.21062	31.9658	59.6301	34.4078	30.4325	26.2688	36.541	52.8778	134.772	67.7437	73.6902	174.64	100.745	5.43569	4.5752	6.81609	5.6293	6.20796	5.51703	6.06062	5.45904	7.27918	4.87254	P	P	P	P	P	P	M	P	P	P	noncoding	uc010sda.1	DKFZp434K1323	UCSC_knowngene	452	chr12	+	78785	80502	CCAAGCTTGTCAAGAATGTCCCAGTAACCAGGGGACACACACTGAAGTGACTGAGGGGTT	intergenic
ASHGA5P026547	0.0133027	2.74884	458.682	166.864	8.4637	7.41868	161.712	242.847	157.072	59.6857	213.001	166.864	676.803	549.24	260.133	187.373	619.859	458.682	9.05866	7.20138	8.77334	7.60172	8.08016	7.70262	7.33197	6.59425	9.07437	7.99343	P	P	P	P	P	P	P	P	P	P	noncoding	AK094629		LincRNAs identified by Khalil et al	2028	chr6	-	161411345	161413374	ATGTGCAGATTTCTTAAACCTCATTTAGTTGAGCTTTGATAGGTGAAACGCACGTTTTGA	natural antisense
ASHGA5P026547	0.0133027	2.74884	458.682	166.864	8.4637	7.41868	161.712	242.847	157.072	59.6857	213.001	166.864	676.803	549.24	260.133	187.373	619.859	458.682	9.05866	7.20138	8.77334	7.60172	8.08016	7.70262	7.33197	6.59425	9.07437	7.99343	P	P	P	P	P	P	P	P	P	P	noncoding	AK094629		LincRNAs identified by Khalil et al	2028	chr6	-	161411345	161413374	ATGTGCAGATTTCTTAAACCTCATTTAGTTGAGCTTTGATAGGTGAAACGCACGTTTTGA	natural antisense
ASHGA5P026547	0.0133027	2.74884	458.682	166.864	8.4637	7.41868	161.712	242.847	157.072	59.6857	213.001	166.864	676.803	549.24	260.133	187.373	619.859	458.682	9.05866	7.20138	8.77334	7.60172	8.08016	7.70262	7.33197	6.59425	9.07437	7.99343	P	P	P	P	P	P	P	P	P	P	noncoding	AK094629		LincRNAs identified by Khalil et al	2028	chr6	-	161411345	161413374	ATGTGCAGATTTCTTAAACCTCATTTAGTTGAGCTTTGATAGGTGAAACGCACGTTTTGA	natural antisense
ASHGA5P026547	0.0133027	2.74884	458.682	166.864	8.4637	7.41868	161.712	242.847	157.072	59.6857	213.001	166.864	676.803	549.24	260.133	187.373	619.859	458.682	9.05866	7.20138	8.77334	7.60172	8.08016	7.70262	7.33197	6.59425	9.07437	7.99343	P	P	P	P	P	P	P	P	P	P	noncoding	AK094629		LincRNAs identified by Khalil et al	2028	chr6	-	161411345	161413374	ATGTGCAGATTTCTTAAACCTCATTTAGTTGAGCTTTGATAGGTGAAACGCACGTTTTGA	natural antisense
ASHGA5P026547	0.0133027	2.74884	458.682	166.864	8.4637	7.41868	161.712	242.847	157.072	59.6857	213.001	166.864	676.803	549.24	260.133	187.373	619.859	458.682	9.05866	7.20138	8.77334	7.60172	8.08016	7.70262	7.33197	6.59425	9.07437	7.99343	P	P	P	P	P	P	P	P	P	P	noncoding	AK094629		LincRNAs identified by Khalil et al	2028	chr6	-	161411345	161413374	ATGTGCAGATTTCTTAAACCTCATTTAGTTGAGCTTTGATAGGTGAAACGCACGTTTTGA	natural antisense
ASHGA5P026547	0.0133027	2.74884	458.682	166.864	8.4637	7.41868	161.712	242.847	157.072	59.6857	213.001	166.864	676.803	549.24	260.133	187.373	619.859	458.682	9.05866	7.20138	8.77334	7.60172	8.08016	7.70262	7.33197	6.59425	9.07437	7.99343	P	P	P	P	P	P	P	P	P	P	noncoding	AK094629		LincRNAs identified by Khalil et al	2028	chr6	-	161411345	161413374	ATGTGCAGATTTCTTAAACCTCATTTAGTTGAGCTTTGATAGGTGAAACGCACGTTTTGA	natural antisense
ASHGA5P022896	0.0284916	2.74829	72.7474	26.47	5.92326	4.75458	38.6726	26.1986	23.2025	25.1815	19.095	26.47	111.206	93.2877	81.2661	33.9369	44.0406	72.7474	6.46421	4.90175	6.31977	4.47231	6.46488	4.87852	5.01989	5.11072	5.34756	4.40959	P	P	P	P	P	P	P	P	P	P	noncoding	NR_024370	LOC440356	RefSeq	659	chr16	+	29875003	29879374	ACCTGGAGGGGGGGATGGCGTCCACTCCGATGGGGAATGAGGGGGAGAAGAAGAGCAGCT	natural antisense
ASHGA5P018912	0.00963389	2.74451	934.634	340.547	9.60237	8.56952	391.319	473.544	348.358	240.93	248.585	340.547	698.502	898.033	760.013	1040.72	1275.9	934.634	9.10592	8.5319	9.48354	8.54796	9.59086	8.82076	9.73405	8.7165	10.0975	8.23047	P	P	P	M	P	P	P	M	M	P	noncoding	NR_052002	ITPA	RefSeq	1137	chr20	+	3190005	3204516	GAAAATTGACCGTACAGGGGCCCGTGCTGGTTGAGGACACTTGTCTGTGCTTCAATGCCC	exon sense-overlapping
ASHGA5P018912	0.00963389	2.74451	934.634	340.547	9.60237	8.56952	391.319	473.544	348.358	240.93	248.585	340.547	698.502	898.033	760.013	1040.72	1275.9	934.634	9.10592	8.5319	9.48354	8.54796	9.59086	8.82076	9.73405	8.7165	10.0975	8.23047	P	P	P	M	P	P	P	M	M	P	noncoding	NR_052002	ITPA	RefSeq	1137	chr20	+	3190005	3204516	GAAAATTGACCGTACAGGGGCCCGTGCTGGTTGAGGACACTTGTCTGTGCTTCAATGCCC	exon sense-overlapping
ASHGA5P018912	0.00963389	2.74451	934.634	340.547	9.60237	8.56952	391.319	473.544	348.358	240.93	248.585	340.547	698.502	898.033	760.013	1040.72	1275.9	934.634	9.10592	8.5319	9.48354	8.54796	9.59086	8.82076	9.73405	8.7165	10.0975	8.23047	P	P	P	M	P	P	P	M	M	P	noncoding	NR_052002	ITPA	RefSeq	1137	chr20	+	3190005	3204516	GAAAATTGACCGTACAGGGGCCCGTGCTGGTTGAGGACACTTGTCTGTGCTTCAATGCCC	exon sense-overlapping
ASHGA5P019650	0.00182035	2.74123	95.28	34.7581	6.39253	5.18342	44.9698	40.0031	27.5949	29.0804	32.1425	34.7581	68.4621	102.659	97.5079	124.325	83.4453	95.28	5.77619	5.15098	6.44337	5.07944	6.71304	5.15624	6.78461	5.37446	6.24546	5.15599	P	P	P	P	P	P	P	P	M	P	noncoding	ENST00000498745	RP11-286H14.6	GENCODE	472	chr7	+	128808052	128809538	TATGTGCTAGCTGCTTGCCCAGCGAGTGTTCCCGGAGTCTCCTCGCCGCACCCCGCTATC	exon sense-overlapping
ASHGA5P021511	0.000887464	2.73938	1217.99	444.625	9.96738	8.95445	398.81	722.256	402.322	348.943	350.793	444.625	920.03	1117.3	1251.45	1793.58	1007.61	1217.99	9.49454	8.56194	9.78726	9.15346	10.275	9.03507	10.512	9.25771	9.76806	8.76407	P	P	P	P	P	P	P	P	P	P	noncoding	ENST00000533775	TSSC2	GENCODE	1210	chr11	+	3404691	3430191	TAGAAAGTAGAGTTTGAACAACTGACTCTTGATGGACACAACCTTCCTTCTCTCGTCTGT	intergenic
ASHGA5P034441	0.0183772	2.73614	678.758	248.072	8.87633	7.9428	414.862	306.914	234.19	209.339	75.0522	248.072	1289.29	359.2	905.805	660.573	178.928	678.758	9.96433	8.61655	8.16775	7.93359	9.83499	8.26584	9.10267	8.50662	7.3119	6.3914	P	P	M	P	P	P	P	P	P	P	noncoding	uc002mkb.1	DKFZp547H118	UCSC_knowngene	1809	chr19	+	8552185	8553994	CTTTTTGACTCTGTCCACCAAAATCTAACAAAATCGGGACTGAGTGTCGTCTCTTCTTCC	exon sense-overlapping
ASHGA5P034441	0.0183772	2.73614	678.758	248.072	8.87633	7.9428	414.862	306.914	234.19	209.339	75.0522	248.072	1289.29	359.2	905.805	660.573	178.928	678.758	9.96433	8.61655	8.16775	7.93359	9.83499	8.26584	9.10267	8.50662	7.3119	6.3914	P	P	M	P	P	P	P	P	P	P	noncoding	uc002mkb.1	DKFZp547H118	UCSC_knowngene	1809	chr19	+	8552185	8553994	CTTTTTGACTCTGTCCACCAAAATCTAACAAAATCGGGACTGAGTGTCGTCTCTTCTTCC	exon sense-overlapping
ASHGA5P025952	0.0208913	2.73241	163.894	59.9815	7.10282	5.97703	74.0609	79.0503	66.3965	46.1555	34.2441	59.9815	127.386	195.565	95.4132	235.003	166.103	163.894	6.66337	5.95626	7.32609	6.02564	6.68078	6.47549	7.63924	6.17966	7.20461	5.2481	P	P	P	P	P	P	P	P	P	P	noncoding	NR_047594	CENPJ	RefSeq	5246	chr13	-	25456411	25497027	ACATCCAGCTCTGTTACACTTTTTAACATGGAGGCAATCCACCTCGAAGATCCAAGTCTG	exon sense-overlapping
ASHGA5P050955	0.00897776	2.72511	1034.99	379.799	9.70974	8.74812	318.464	504.779	440.591	297.121	338.042	379.799	609.29	981.306	1105.87	894.647	1583.86	1034.99	8.90393	8.22455	9.6187	8.63312	10.1073	9.16442	9.5247	9.01663	10.3941	8.70187	P	P	P	P	P	P	P	P	P	P	noncoding	ENST00000440595	RP5-1125A11.1	GENCODE	660	chr20	-	32580293	32582161	TTCTCAAAAGAACTCTTCCCTGAACACCTTGTCTCAAGATGTTCTCTAGTTTGTCTTCTT	intronic antisense
ASHGA5P050955	0.00897776	2.72511	1034.99	379.799	9.70974	8.74812	318.464	504.779	440.591	297.121	338.042	379.799	609.29	981.306	1105.87	894.647	1583.86	1034.99	8.90393	8.22455	9.6187	8.63312	10.1073	9.16442	9.5247	9.01663	10.3941	8.70187	P	P	P	P	P	P	P	P	P	P	noncoding	ENST00000440595	RP5-1125A11.1	GENCODE	660	chr20	-	32580293	32582161	TTCTCAAAAGAACTCTTCCCTGAACACCTTGTCTCAAGATGTTCTCTAGTTTGTCTTCTT	intronic antisense
ASHGA5P025796	0.0394382	2.71676	3646.21	1342.12	11.4316	10.5825	1102.89	2109.61	1128.97	977.759	1391.37	1342.12	3216.76	2448.78	2343.58	7441.19	2780.76	3646.21	11.2939	10.119	10.9254	10.7401	11.1576	10.4783	12.5466	10.7786	11.2347	10.7965	P	P	M	P	P	P	P	P	P	P	noncoding	NR_037937	SCNM1	RefSeq	1986	chr1	+	151138497	151142773	GGAAGTACAGAGGTCAAACTCCAAAGTGGGAAGATCAGTAGGGAACCTGAACCTGCGGCT	exon sense-overlapping
ASHGA5P025796	0.0394382	2.71676	3646.21	1342.12	11.4316	10.5825	1102.89	2109.61	1128.97	977.759	1391.37	1342.12	3216.76	2448.78	2343.58	7441.19	2780.76	3646.21	11.2939	10.119	10.9254	10.7401	11.1576	10.4783	12.5466	10.7786	11.2347	10.7965	P	P	M	P	P	P	P	P	P	P	noncoding	NR_037937	SCNM1	RefSeq	1986	chr1	+	151138497	151142773	GGAAGTACAGAGGTCAAACTCCAAAGTGGGAAGATCAGTAGGGAACCTGAACCTGCGGCT	exon sense-overlapping
ASHGA5P025796	0.0394382	2.71676	3646.21	1342.12	11.4316	10.5825	1102.89	2109.61	1128.97	977.759	1391.37	1342.12	3216.76	2448.78	2343.58	7441.19	2780.76	3646.21	11.2939	10.119	10.9254	10.7401	11.1576	10.4783	12.5466	10.7786	11.2347	10.7965	P	P	M	P	P	P	P	P	P	P	noncoding	NR_037937	SCNM1	RefSeq	1986	chr1	+	151138497	151142773	GGAAGTACAGAGGTCAAACTCCAAAGTGGGAAGATCAGTAGGGAACCTGAACCTGCGGCT	exon sense-overlapping
ASHGA5P025796	0.0394382	2.71676	3646.21	1342.12	11.4316	10.5825	1102.89	2109.61	1128.97	977.759	1391.37	1342.12	3216.76	2448.78	2343.58	7441.19	2780.76	3646.21	11.2939	10.119	10.9254	10.7401	11.1576	10.4783	12.5466	10.7786	11.2347	10.7965	P	P	M	P	P	P	P	P	P	P	noncoding	NR_037937	SCNM1	RefSeq	1986	chr1	+	151138497	151142773	GGAAGTACAGAGGTCAAACTCCAAAGTGGGAAGATCAGTAGGGAACCTGAACCTGCGGCT	natural antisense
ASHGA5P058187	0.00957054	2.71189	794.079	292.814	9.32943	8.31565	287.636	472.111	189.139	184.682	330.503	292.814	1036.89	903.702	441.066	1003.33	585.417	794.079	9.6563	8.07695	9.49454	8.54434	8.82735	7.96246	9.68468	8.3293	8.98424	8.66522	P	P	P	P	P	P	P	P	P	P	noncoding	TCONS_00027642	XLOC_013181	LincRNAs identified by Cabili et al	425	chr19	+	58782948	58785962	ACATGAGGAGAAATTTGGAGACAGACAACTTGTCACGCATACAGGGAAAATGACATTTGA	intergenic
ASHGA5P043446	0.0492775	2.70937	88.7793	32.7674	6.19966	5.08335	30.7242	37.6047	37.7216	24.5333	33.2534	32.7675	158.772	70.0989	51.4833	53.3763	110.166	88.7793	6.98682	4.50482	5.9397	4.99033	5.81559	5.65428	5.6306	5.06365	6.62557	5.20368	P	P	P	P	P	P	P	P	P	P	noncoding	ENST00000455709	AC005534.8	GENCODE	742	chr7	-	156446878	156450387	CATATGGCACCCACCTATAACTTTAATGACACCATTTGCAAACAAAGATTAAAGAACTAC	natural antisense
ASHGA5P043446	0.0492775	2.70937	88.7793	32.7674	6.19966	5.08335	30.7242	37.6047	37.7216	24.5333	33.2534	32.7675	158.772	70.0989	51.4833	53.3763	110.166	88.7793	6.98682	4.50482	5.9397	4.99033	5.81559	5.65428	5.6306	5.06365	6.62557	5.20368	P	P	P	P	P	P	P	P	P	P	noncoding	ENST00000455709	AC005534.8	GENCODE	742	chr7	-	156446878	156450387	CATATGGCACCCACCTATAACTTTAATGACACCATTTGCAAACAAAGATTAAAGAACTAC	natural antisense
ASHGA5P043446	0.0492775	2.70937	88.7793	32.7674	6.19966	5.08335	30.7242	37.6047	37.7216	24.5333	33.2534	32.7675	158.772	70.0989	51.4833	53.3763	110.166	88.7793	6.98682	4.50482	5.9397	4.99033	5.81559	5.65428	5.6306	5.06365	6.62557	5.20368	P	P	P	P	P	P	P	P	P	P	noncoding	ENST00000455709	AC005534.8	GENCODE	742	chr7	-	156446878	156450387	CATATGGCACCCACCTATAACTTTAATGACACCATTTGCAAACAAAGATTAAAGAACTAC	natural antisense
ASHGA5P054779	0.00591708	2.70869	287.195	106.027	7.9407	6.84201	147.449	133.907	68.3978	78.8122	101.571	106.027	298.557	246.071	266.389	232.102	392.858	287.195	7.88426	7.04904	7.64548	6.75181	8.1146	6.52036	7.6263	7.03541	8.43286	6.85345	P	P	P	P	P	P	P	P	P	P	noncoding	ENST00000445840	RP4-669L17.4	pseudogene	180	chr1	+	334125	334305	TGCAGGACAAGTTCGAGCATCTTAAAATGATTCAACAGGAGGAGATAAGGAAGCTCGAGG
ASHGA5P017404	0.0123008	2.70427	1164.6	430.653	9.9216	8.95492	464.104	450.234	354.716	362.458	521.754	430.653	1552.14	1154.21	1063.46	1048.77	1004.44	1164.6	10.2221	8.79496	9.8292	8.47418	10.0494	8.8547	9.7441	9.31475	9.76324	9.33599	P	P	P	P	P	P	P	P	P	P	noncoding	ENST00000441075	AC068491.1	GENCODE	704	chr2	-	112187019	112252602	TGGAGCCACCAGCCTCTCCCTGACTCACGCCCAAAGTTACGGAGGACCCAGCAACCATCT	intergenic
ASHGA5P019428	0.038872	2.66591	12930.9	4850.45	13.2499	12.4404	4923.64	7531.96	4655.87	3720.83	3419.97	4850.45	10472.4	8513.49	7812.32	24184.5	13671.7	12930.9	12.9647	12.289	12.7761	12.6283	12.865	12.4982	14.1958	12.6919	13.4478	12.0947	P	P	P	P	P	P	P	P	P	P	noncoding	NR_026562	C20orf24	RefSeq	1251	chr20	+	35234136	35240960	AGCATCTCAGATTCTGCCTGATCAATGCAGGAGTCCTGTACCTCTACTTCAGCAATTACC	exon sense-overlapping
ASHGA5P019428	0.038872	2.66591	12930.9	4850.45	13.2499	12.4404	4923.64	7531.96	4655.87	3720.83	3419.97	4850.45	10472.4	8513.49	7812.32	24184.5	13671.7	12930.9	12.9647	12.289	12.7761	12.6283	12.865	12.4982	14.1958	12.6919	13.4478	12.0947	P	P	P	P	P	P	P	P	P	P	noncoding	NR_026562	C20orf24	RefSeq	1251	chr20	+	35234136	35240960	AGCATCTCAGATTCTGCCTGATCAATGCAGGAGTCCTGTACCTCTACTTCAGCAATTACC	exon sense-overlapping
ASHGA5P019428	0.038872	2.66591	12930.9	4850.45	13.2499	12.4404	4923.64	7531.96	4655.87	3720.83	3419.97	4850.45	10472.4	8513.49	7812.32	24184.5	13671.7	12930.9	12.9647	12.289	12.7761	12.6283	12.865	12.4982	14.1958	12.6919	13.4478	12.0947	P	P	P	P	P	P	P	P	P	P	noncoding	NR_026562	C20orf24	RefSeq	1251	chr20	+	35234136	35240960	AGCATCTCAGATTCTGCCTGATCAATGCAGGAGTCCTGTACCTCTACTTCAGCAATTACC	exon sense-overlapping
ASHGA5P019428	0.038872	2.66591	12930.9	4850.45	13.2499	12.4404	4923.64	7531.96	4655.87	3720.83	3419.97	4850.45	10472.4	8513.49	7812.32	24184.5	13671.7	12930.9	12.9647	12.289	12.7761	12.6283	12.865	12.4982	14.1958	12.6919	13.4478	12.0947	P	P	P	P	P	P	P	P	P	P	noncoding	NR_026562	C20orf24	RefSeq	1251	chr20	+	35234136	35240960	AGCATCTCAGATTCTGCCTGATCAATGCAGGAGTCCTGTACCTCTACTTCAGCAATTACC	exon sense-overlapping
ASHGA5P019428	0.038872	2.66591	12930.9	4850.45	13.2499	12.4404	4923.64	7531.96	4655.87	3720.83	3419.97	4850.45	10472.4	8513.49	7812.32	24184.5	13671.7	12930.9	12.9647	12.289	12.7761	12.6283	12.865	12.4982	14.1958	12.6919	13.4478	12.0947	P	P	P	P	P	P	P	P	P	P	noncoding	NR_026562	C20orf24	RefSeq	1251	chr20	+	35234136	35240960	AGCATCTCAGATTCTGCCTGATCAATGCAGGAGTCCTGTACCTCTACTTCAGCAATTACC	natural antisense
ASHGA5P019428	0.038872	2.66591	12930.9	4850.45	13.2499	12.4404	4923.64	7531.96	4655.87	3720.83	3419.97	4850.45	10472.4	8513.49	7812.32	24184.5	13671.7	12930.9	12.9647	12.289	12.7761	12.6283	12.865	12.4982	14.1958	12.6919	13.4478	12.0947	P	P	P	P	P	P	P	P	P	P	noncoding	NR_026562	C20orf24	RefSeq	1251	chr20	+	35234136	35240960	AGCATCTCAGATTCTGCCTGATCAATGCAGGAGTCCTGTACCTCTACTTCAGCAATTACC	natural antisense
ASHGA5P017370	0.00289547	2.65756	2856	1074.67	11.2092	10.2594	1085.18	1606.67	1074.53	698.594	908.365	1074.67	2913.16	2800.25	2490.53	2365.47	3710.6	2856	11.1424	10.096	11.1178	10.3318	11.2376	10.4194	10.8982	10.2699	11.65	10.18	P	P	P	P	P	P	P	P	P	P	noncoding	NR_052024	EIF6	RefSeq	803	chr20	-	33866708	33872520	ACTTCTACAGGAGACAGAAGAAATTCTGGCAGATGTGCTCAAGGTGGAAGTCTTCAGACA	exon sense-overlapping
ASHGA5P017370	0.00289547	2.65756	2856	1074.67	11.2092	10.2594	1085.18	1606.67	1074.53	698.594	908.365	1074.67	2913.16	2800.25	2490.53	2365.47	3710.6	2856	11.1424	10.096	11.1178	10.3318	11.2376	10.4194	10.8982	10.2699	11.65	10.18	P	P	P	P	P	P	P	P	P	P	noncoding	NR_052024	EIF6	RefSeq	803	chr20	-	33866708	33872520	ACTTCTACAGGAGACAGAAGAAATTCTGGCAGATGTGCTCAAGGTGGAAGTCTTCAGACA	exon sense-overlapping
ASHGA5P017370	0.00289547	2.65756	2856	1074.67	11.2092	10.2594	1085.18	1606.67	1074.53	698.594	908.365	1074.67	2913.16	2800.25	2490.53	2365.47	3710.6	2856	11.1424	10.096	11.1178	10.3318	11.2376	10.4194	10.8982	10.2699	11.65	10.18	P	P	P	P	P	P	P	P	P	P	noncoding	NR_052024	EIF6	RefSeq	803	chr20	-	33866708	33872520	ACTTCTACAGGAGACAGAAGAAATTCTGGCAGATGTGCTCAAGGTGGAAGTCTTCAGACA	exon sense-overlapping
ASHGA5P017370	0.00289547	2.65756	2856	1074.67	11.2092	10.2594	1085.18	1606.67	1074.53	698.594	908.365	1074.67	2913.16	2800.25	2490.53	2365.47	3710.6	2856	11.1424	10.096	11.1178	10.3318	11.2376	10.4194	10.8982	10.2699	11.65	10.18	P	P	P	P	P	P	P	P	P	P	noncoding	NR_052024	EIF6	RefSeq	803	chr20	-	33866708	33872520	ACTTCTACAGGAGACAGAAGAAATTCTGGCAGATGTGCTCAAGGTGGAAGTCTTCAGACA	exon sense-overlapping
ASHGA5P019467	0.00533722	2.65104	492.993	185.962	8.69399	7.70376	194.032	264.704	152.665	160.351	158.06	185.962	319.945	636.782	453.669	505.986	548.583	492.993	7.97903	7.47722	8.9959	7.72367	8.86433	7.66149	8.73168	8.12243	8.89904	7.53398	P	P	P	P	P	P	P	P	P	P	noncoding	ENST00000486431	RP11-666A20.1	GENCODE	1671	chr3	+	125635467	125648832	CATCAAAAAGGCCAGGCCAGGATCAGATGGGAAGTGGAACCTCGTCATGACCAGAAACTG	natural antisense
ASHGA5P019467	0.00533722	2.65104	492.993	185.962	8.69399	7.70376	194.032	264.704	152.665	160.351	158.06	185.962	319.945	636.782	453.669	505.986	548.583	492.993	7.97903	7.47722	8.9959	7.72367	8.86433	7.66149	8.73168	8.12243	8.89904	7.53398	P	P	P	P	P	P	P	P	P	P	noncoding	ENST00000486431	RP11-666A20.1	GENCODE	1671	chr3	+	125635467	125648832	CATCAAAAAGGCCAGGCCAGGATCAGATGGGAAGTGGAACCTCGTCATGACCAGAAACTG	natural antisense
ASHGA5P022774	0.027516	2.64796	377.458	142.547	8.19013	7.21694	124.979	251.341	149.132	101.071	86.2119	142.547	152.236	711.134	313.72	342.565	367.634	377.458	6.92662	6.78511	9.15346	7.65381	8.35153	7.62927	8.18467	7.41362	8.33439	6.60288	P	P	P	P	P	P	P	P	P	P	noncoding	ENST00000562555	RP11-259G18.1	pseudogene	298	chr17	+	44344777	44346060	TGTCCAGAGTTTAAACCTGGCAGCAGGTATATTGTGATGGGCCACATCTACCATAAGAGA
ASHGA5P015107	0.0121485	2.64769	813.571	307.276	9.38996	8.43029	289.07	465.565	272.596	231.638	277.512	307.276	1122.14	889.376	476.779	719.033	860.526	813.571	9.76693	8.08475	9.46625	8.52614	8.9335	8.48262	9.2296	8.66103	9.55351	8.39693	P	P	P	P	P	P	P	P	P	P	noncoding	NR_027438	IP6K2	RefSeq	1385	chr3	-	48730883	48754711	GGGTAATTAGGACAAAGCCAAAGGCCCCTTGTTAGCTGGCCATCCCTGCCCCATTTTTTC	exon sense-overlapping
ASHGA5P015107	0.0121485	2.64769	813.571	307.276	9.38996	8.43029	289.07	465.565	272.596	231.638	277.512	307.276	1122.14	889.376	476.779	719.033	860.526	813.571	9.76693	8.08475	9.46625	8.52614	8.9335	8.48262	9.2296	8.66103	9.55351	8.39693	P	P	P	P	P	P	P	P	P	P	noncoding	NR_027438	IP6K2	RefSeq	1385	chr3	-	48730883	48754711	GGGTAATTAGGACAAAGCCAAAGGCCCCTTGTTAGCTGGCCATCCCTGCCCCATTTTTTC	exon sense-overlapping
ASHGA5P015107	0.0121485	2.64769	813.571	307.276	9.38996	8.43029	289.07	465.565	272.596	231.638	277.512	307.276	1122.14	889.376	476.779	719.033	860.526	813.571	9.76693	8.08475	9.46625	8.52614	8.9335	8.48262	9.2296	8.66103	9.55351	8.39693	P	P	P	P	P	P	P	P	P	P	noncoding	NR_027438	IP6K2	RefSeq	1385	chr3	-	48730883	48754711	GGGTAATTAGGACAAAGCCAAAGGCCCCTTGTTAGCTGGCCATCCCTGCCCCATTTTTTC	exon sense-overlapping
ASHGA5P015107	0.0121485	2.64769	813.571	307.276	9.38996	8.43029	289.07	465.565	272.596	231.638	277.512	307.276	1122.14	889.376	476.779	719.033	860.526	813.571	9.76693	8.08475	9.46625	8.52614	8.9335	8.48262	9.2296	8.66103	9.55351	8.39693	P	P	P	P	P	P	P	P	P	P	noncoding	NR_027438	IP6K2	RefSeq	1385	chr3	-	48730883	48754711	GGGTAATTAGGACAAAGCCAAAGGCCCCTTGTTAGCTGGCCATCCCTGCCCCATTTTTTC	exon sense-overlapping
ASHGA5P015107	0.0121485	2.64769	813.571	307.276	9.38996	8.43029	289.07	465.565	272.596	231.638	277.512	307.276	1122.14	889.376	476.779	719.033	860.526	813.571	9.76693	8.08475	9.46625	8.52614	8.9335	8.48262	9.2296	8.66103	9.55351	8.39693	P	P	P	P	P	P	P	P	P	P	noncoding	NR_027438	IP6K2	RefSeq	1385	chr3	-	48730883	48754711	GGGTAATTAGGACAAAGCCAAAGGCCCCTTGTTAGCTGGCCATCCCTGCCCCATTTTTTC	exon sense-overlapping
ASHGA5P015107	0.0121485	2.64769	813.571	307.276	9.38996	8.43029	289.07	465.565	272.596	231.638	277.512	307.276	1122.14	889.376	476.779	719.033	860.526	813.571	9.76693	8.08475	9.46625	8.52614	8.9335	8.48262	9.2296	8.66103	9.55351	8.39693	P	P	P	P	P	P	P	P	P	P	noncoding	NR_027438	IP6K2	RefSeq	1385	chr3	-	48730883	48754711	GGGTAATTAGGACAAAGCCAAAGGCCCCTTGTTAGCTGGCCATCCCTGCCCCATTTTTTC	exon sense-overlapping
ASHGA5P015107	0.0121485	2.64769	813.571	307.276	9.38996	8.43029	289.07	465.565	272.596	231.638	277.512	307.276	1122.14	889.376	476.779	719.033	860.526	813.571	9.76693	8.08475	9.46625	8.52614	8.9335	8.48262	9.2296	8.66103	9.55351	8.39693	P	P	P	P	P	P	P	P	P	P	noncoding	NR_027438	IP6K2	RefSeq	1385	chr3	-	48730883	48754711	GGGTAATTAGGACAAAGCCAAAGGCCCCTTGTTAGCTGGCCATCCCTGCCCCATTTTTTC	exon sense-overlapping
ASHGA5P015107	0.0121485	2.64769	813.571	307.276	9.38996	8.43029	289.07	465.565	272.596	231.638	277.512	307.276	1122.14	889.376	476.779	719.033	860.526	813.571	9.76693	8.08475	9.46625	8.52614	8.9335	8.48262	9.2296	8.66103	9.55351	8.39693	P	P	P	P	P	P	P	P	P	P	noncoding	NR_027438	IP6K2	RefSeq	1385	chr3	-	48730883	48754711	GGGTAATTAGGACAAAGCCAAAGGCCCCTTGTTAGCTGGCCATCCCTGCCCCATTTTTTC	exon sense-overlapping
ASHGA5P050602	0.0233035	2.63906	223.337	84.6273	7.22556	6.162	46.5501	175.866	40.1674	134.693	25.8596	84.6273	219.192	304.805	79.2476	455.804	57.635	223.337	7.45581	5.20911	7.93581	7.13841	6.43079	5.75002	8.58241	7.86265	5.72299	4.84983	P	P	P	P	P	P	P	P	P	P	noncoding	ENST00000484422	PLGLA	GENCODE	700	chr2	+	107002768	107007851	GCAGACCTAGGTAAGACTTTCCCTTTCATCTTTGTGTTCATCTACTGTAAAGTTGTCCCT	intergenic
ASHGA5P007113	0.0244672	2.62974	349.9	133.055	8.03914	7.13176	142.382	131.501	72.8957	89.9367	228.558	133.055	476.088	356.608	108.886	243.391	564.525	349.9	8.54869	6.99291	8.15862	6.72656	6.86131	6.6102	7.69011	7.22773	8.93697	8.1014	P	P	P	P	P	P	P	P	P	P	noncoding	ENST00000449061	RP11-823P9.1	pseudogene	758	chr5	+	21459668	21501935	AACTCGAAGAACAGCTGTGGAAAGAAGTTGCAAAACACTGGGGCTGGTGAATTACCAGAT
ASHGA5P031476	0.00413836	2.62094	587.935	224.322	8.83612	7.81444	409.063	306.51	99.1398	121.89	185.009	224.322	904.486	608.702	250.618	377.788	798.08	587.935	9.4722	8.59508	8.92075	7.93111	8.0289	7.05138	8.32215	7.71557	9.43657	7.77905	P	P	P	P	P	P	P	P	P	P	noncoding	uc002cqx.3	LOC652276	UCSC_knowngene	4107	chr16	+	2653384	2667132	AATCAAGACAAGTCACTGCCAGGGTGAAAACGTGATTCTGACCAAAGAAACCCAAACCTG	intergenic
ASHGA5P019152	0.0256559	2.60254	15228.7	5851.46	13.5117	12.6407	8266.36	6063.06	3199.11	3209.59	8519.18	5851.46	20650.7	11113.5	12216.3	7075.91	25087	15228.7	14.0137	13.0767	13.1613	12.2996	13.4657	11.9437	12.4785	12.5015	14.4393	13.3821	P	P	P	P	P	P	P	P	P	P	noncoding	NR_027165	C17orf76-AS1	RefSeq	936	chr17	+	16342300	16345340	CTGCCATGAGGTTATATTCCCAGAGGATGTCAGTCCCAAGGACCAGTAGCTGCCATCAGT	natural antisense
ASHGA5P019152	0.0256559	2.60254	15228.7	5851.46	13.5117	12.6407	8266.36	6063.06	3199.11	3209.59	8519.18	5851.46	20650.7	11113.5	12216.3	7075.91	25087	15228.7	14.0137	13.0767	13.1613	12.2996	13.4657	11.9437	12.4785	12.5015	14.4393	13.3821	P	P	P	P	P	P	P	P	P	P	noncoding	NR_027165	C17orf76-AS1	RefSeq	936	chr17	+	16342300	16345340	CTGCCATGAGGTTATATTCCCAGAGGATGTCAGTCCCAAGGACCAGTAGCTGCCATCAGT	natural antisense
ASHGA5P019270	0.0174745	2.58178	15944.9	6175.95	13.5961	12.7227	8612.33	6497.11	3439.83	3371.56	8958.9	6175.95	21542	11759.1	12576.4	7955.59	25891.4	15944.9	14.0819	13.1373	13.2338	12.4067	13.5253	12.0581	12.6464	12.5564	14.4933	13.4549	P	P	P	P	P	P	P	P	P	P	noncoding	NR_027170	C17orf76-AS1	RefSeq	993	chr17	+	16342300	16345340	CCAAGAGAAGGTTATATTCCCAGAGGATGTCAGTCCCAAGGACCAGTAGCTGCCATCAGT	natural antisense
ASHGA5P019270	0.0174745	2.58178	15944.9	6175.95	13.5961	12.7227	8612.33	6497.11	3439.83	3371.56	8958.9	6175.95	21542	11759.1	12576.4	7955.59	25891.4	15944.9	14.0819	13.1373	13.2338	12.4067	13.5253	12.0581	12.6464	12.5564	14.4933	13.4549	P	P	P	P	P	P	P	P	P	P	noncoding	NR_027170	C17orf76-AS1	RefSeq	993	chr17	+	16342300	16345340	CCAAGAGAAGGTTATATTCCCAGAGGATGTCAGTCCCAAGGACCAGTAGCTGCCATCAGT	natural antisense
ASHGA5P053588	0.00988209	2.57908	123.678	47.9544	6.74541	5.57148	41.6445	72.1799	63.6259	26.4755	35.8461	47.9544	152.592	164.685	100.605	84.4888	116.022	123.678	6.92955	5.02329	7.09076	5.90208	6.75673	6.41509	6.25036	5.20489	6.69967	5.31203	P	P	P	P	P	P	P	P	P	P	noncoding	ENST00000523031	RP13-582O9.5	GENCODE	689	chr8	-	144362330	144363019	ATCACAAGTCTGTTAAGGTTGGAGAATCAAGTGAACATGCTGAAAAGTTATGGGGAATGT	intergenic
ASHGA5P054788	0.00405164	2.56945	261.233	101.669	7.82111	6.69763	145.738	147.784	48.624	60.8353	105.362	101.669	284.071	266.112	212.712	294.667	248.605	261.233	7.81859	7.02972	7.74557	6.89103	7.80556	6.03149	7.96028	6.6268	7.77554	6.90911	P	P	P	P	P	P	P	P	P	P	noncoding	NR_028327	LOC100133331	RefSeq	4273	chr1	-	661138	665731	AAGGGATGTGGGTCTGAAGAGCTTGGTTGCAGAAACTTCGGGGTCTACAAACGCAGGCGG	intergenic
ASHGA5P015331	0.037486	2.5649	146.222	57.0088	6.90886	5.92454	50.8244	83.6541	50.9991	58.124	41.4423	57.0088	152.571	156.776	235.723	121.187	64.8532	146.222	6.92931	5.353	7.02907	6.10315	7.94148	6.10266	6.74968	6.54783	5.89474	5.51607	P	P	P	P	P	P	P	P	P	P	noncoding	ENST00000419361	RP11-439E19.3	GENCODE	552	chr1	+	246953925	246955687	AAGAAGATGAGAGTCAAAGACACCCAGCAAACGGCGGTTTCCGTGAGCAGGGTTGGAGCC	bidirectional
ASHGA5P049515	0.0187692	2.55421	290.46	113.718	7.71801	6.80629	127.654	106.817	53.9898	57.2267	222.905	113.718	428.78	192.343	152.797	111.274	567.109	290.46	8.39375	6.81663	7.30299	6.44027	7.31652	6.18556	6.63293	6.52411	8.94387	8.06488	P	P	P	P	P	P	P	P	P	P	noncoding	NR_027667	C17orf76-AS1	RefSeq	1259	chr17	+	16342300	16345340	AGGCTCATGGATCACTCTTTTGTGGTAGGGCCACATCTGCCAGAGCCTGGAGTCTGCGAA	natural antisense
ASHGA5P049515	0.0187692	2.55421	290.46	113.718	7.71801	6.80629	127.654	106.817	53.9898	57.2267	222.905	113.718	428.78	192.343	152.797	111.274	567.109	290.46	8.39375	6.81663	7.30299	6.44027	7.31652	6.18556	6.63293	6.52411	8.94387	8.06488	P	P	P	P	P	P	P	P	P	P	noncoding	NR_027667	C17orf76-AS1	RefSeq	1259	chr17	+	16342300	16345340	AGGCTCATGGATCACTCTTTTGTGGTAGGGCCACATCTGCCAGAGCCTGGAGTCTGCGAA	natural antisense
ASHGA5P051739	0.0187924	2.55014	985.065	386.279	9.65522	8.76438	302.151	549.871	411.671	287.932	379.77	386.279	962.176	1159.25	1104.57	1151.83	547.495	985.065	9.55649	8.14691	9.83591	8.76183	10.1043	9.06676	9.88326	8.9674	8.89612	8.87899	P	P	P	P	P	P	P	P	P	M	noncoding	ENST00000440084	RP11-277L2.2	GENCODE	2102	chr1	+	149576160	149641425	CGTCCCCGGCACCCTCGGTCCCCCACGGCGGTTGGTCCGGGCGGGGGAAGGAGAAAGTGA	intergenic
ASHGA5P049701	0.012683	2.5461	151.755	59.603	6.96892	5.93861	59.5617	96.9347	53.2452	36.6407	51.6329	59.603	171.197	230.139	92.7321	82.2563	182.452	151.755	7.09652	5.6117	7.54752	6.2952	6.64695	6.16642	6.21284	5.78632	7.34074	5.83344	P	P	P	P	P	P	P	P	P	P	noncoding	NR_027295	MGC57346	RefSeq	2608	chr17	+	43697980	43715329	TCTTTGTGCCTTGTGGCCACATCAGCTAGCCTCTGCTGTGTGCACGTGTACGTGTGTGCT	exon sense-overlapping
ASHGA5P029314	0.00140481	2.54533	164.215	64.5162	7.14846	6.06862	99.8275	81.6586	46.7976	42.7536	51.544	64.5162	195.84	213.355	134.47	117.792	159.619	164.215	7.2858	6.42411	7.44738	6.06688	7.14724	5.97006	6.71372	6.04962	7.14816	5.8324	P	P	P	P	P	P	P	P	P	P	noncoding	TCONS_00010872	XLOC_004697	LincRNAs identified by Cabili et al	1261	chr5	-	858993	860350	TTCTCTTGCTCTTCAGCCTGGACCTGTGATGTGATAGGCGTGAGAAGGAACTGTGGGTTC	intergenic
ASHGA5P025800	0.0113345	2.52934	805.455	318.445	9.36462	8.40318	329.398	571.02	275.282	171.228	245.298	318.445	576.988	952.435	535.444	1164.3	798.113	805.455	8.8249	8.2812	9.57517	8.80764	9.08739	8.49691	9.89807	8.21581	9.43755	8.21435	P	P	M	P	P	P	P	P	M	P	noncoding	NR_038131	UNK	RefSeq	1353	chr17	+	73780919	73790279	ATGCCTGAAGCTATGGTTGATACTAAAGGAGGTTTTCCCACTATCCGTATGCATCTTCTC	exon sense-overlapping
ASHGA5P018903	0.04018	2.52259	5796.65	2297.89	12.0491	11.2477	3259.96	2500.02	1135.71	1104.13	3489.65	2297.89	8171.26	4065.14	4443.34	2341.83	9961.66	5796.65	12.5816	11.6855	11.6786	10.9837	12.0681	10.4858	10.8792	10.9658	13.0378	12.1178	P	P	P	P	P	P	P	P	P	P	noncoding	ENST00000483140	C17orf76-AS1	GENCODE	936	chr17	+	16342640	16345337	TAGCCACGAGGTTGCAAATTCGTGAAGAATCAGCATCATGTTTGGCAGCTGAGTATTGGA	natural antisense
ASHGA5P018903	0.04018	2.52259	5796.65	2297.89	12.0491	11.2477	3259.96	2500.02	1135.71	1104.13	3489.65	2297.89	8171.26	4065.14	4443.34	2341.83	9961.66	5796.65	12.5816	11.6855	11.6786	10.9837	12.0681	10.4858	10.8792	10.9658	13.0378	12.1178	P	P	P	P	P	P	P	P	P	P	noncoding	ENST00000483140	C17orf76-AS1	GENCODE	936	chr17	+	16342640	16345337	TAGCCACGAGGTTGCAAATTCGTGAAGAATCAGCATCATGTTTGGCAGCTGAGTATTGGA	natural antisense
ASHGA5P037342	0.0163757	2.52137	257.242	102.025	7.72366	6.66653	138.223	166.781	90.8936	44.6106	69.6156	102.025	219.923	418.557	146.702	261.574	239.455	257.242	7.46005	6.94844	8.38315	7.05582	7.26333	6.92647	7.78666	6.12063	7.72511	6.28126	P	P	P	P	P	P	P	P	P	P	noncoding	uc002zcj.2	AX747730	UCSC_knowngene	2538	chr21	-	44263542	44266080	CTCTGTTCCTGTTGAATCATTCTTCGTGTTAAATGTTTCTATCTCTTGACTGATACATGA	intron sense-overlapping
ASHGA5P026684	0.0443649	2.51975	617.381	245.016	8.85503	7.99139	294.716	433.13	191.844	185.088	120.303	245.016	1236.27	758.692	318.388	408.729	364.826	617.381	9.90569	8.11494	9.24056	8.40892	8.37477	7.98263	8.432	8.33154	8.32215	7.11891	P	P	P	P	P	P	M	P	P	P	noncoding	ENST00000534499	RP11-113K21.5	GENCODE	597	chr11	+	82783163	82784236	TAGGCCTTCTGACGTCTGGCAATAGATTCCAGAGTAACATCGGTCATGGATAAATTTTTT	bidirectional
ASHGA5P051881	0.00581585	2.51547	119.883	47.6585	6.67273	5.63239	49.7639	71.8408	41.6661	33.4605	41.5611	47.6585	113.829	170.831	74.4876	86.2472	154.022	119.883	6.49864	5.32018	7.14586	5.89489	6.34232	5.79898	6.27887	5.628	7.09795	5.51992	P	P	P	P	P	P	P	P	P	P	noncoding	ENST00000512092	FAM86EP	GENCODE	462	chr4	-	3949631	3956770	CTTTTTAAAGGCAGTAATCGTTCTGGTCACTGCGACACAGCTGCCCTCGCCCATTCTAAA	intergenic
ASHGA5P058599	0.0043296	2.50979	139.138	55.4382	6.91775	5.78816	85.0579	70.6348	27.8824	34.867	58.7486	55.4381	146.949	107.284	102.871	148.037	190.549	139.138	6.87669	6.16708	6.50574	5.8721	6.78817	5.17403	7.01357	5.70177	7.40458	6.02582	P	P	P	P	P	P	P	P	P	P	noncoding	uc010qvj.2	AL137655	UCSC_knowngene	2174	chr11	-	120810	139612	CGAAACGTGACTGCAGGACAAGTTCGAGCATCTTAAAATGATTCAACAGGAGGAGATAAG	intergenic
ASHGA5P058349	0.00428175	2.50044	89.3953	35.7518	6.32068	5.14075	47.8272	54.0387	30.5675	28.8646	17.461	35.7518	81.2296	107.266	99.1261	82.4554	76.8996	89.3953	6.01686	5.25329	6.50526	5.49229	6.73761	5.32157	6.21584	5.36168	6.12782	4.27494	P	P	P	P	P	P	P	P	P	P	noncoding	uc001mie.3	BC073899	UCSC_knowngene	573	chr11	+	9801925	9812791	ATGGATTTGGGGAAACAGATCCAGATGGAGGAAACATCTGATAAAGTTTGCCTAAGCAGC	natural antisense
ASHGA5P043147	0.0161193	2.50009	129.544	51.8154	6.77154	5.81793	62.8917	57.6029	46.6111	45.2613	46.7102	51.8154	122.789	77.7748	216.018	129.047	102.088	129.544	6.60867	5.70195	6.06811	5.58249	7.8274	5.96432	6.83304	6.14769	6.5205	5.69319	P	P	P	P	P	P	P	P	M	P	noncoding	uc003ucq.3	PMS2L2	UCSC_knowngene	1178	chr7	-	74952890	74988229	AAGTGAAGAAAAGAGTAGTCAGTGCCCAACATCATGGATCTCTCACTGAACACACCATGC	intergenic
ASHGA5P054784	0.0163422	2.49896	238.669	95.5074	7.69276	6.71932	111.36	114.432	64.3237	94.6001	92.8217	95.5074	232.751	216.859	238.645	200.461	304.627	238.669	7.53883	6.60464	7.46878	6.53631	7.96398	6.43056	7.4303	7.31397	8.06189	6.71112	P	P	M	P	P	P	P	M	P	P	noncoding	ENST00000448605	RP5-857K21.4	GENCODE	274	chr1	-	639064	655580	ACAAGTTCGAGCATCTTAAAATGATTCAACAGGAGGAGATAAGGAAGCTCGAGGAAGAGA	intergenic
ASHGA5P030923	0.043938	2.49752	348.035	139.352	7.81771	7.0306	45.074	285.109	127.386	111.155	128.038	139.352	76.2507	843.955	208.664	229.082	382.223	348.035	5.92321	5.1549	9.38703	7.82329	7.77905	7.40524	7.61013	7.559	8.38915	7.21058	P	P	P	P	P	P	P	P	P	P	noncoding	ENST00000573220	RP11-95P2.3	GENCODE	318	chr16	-	4230117	4233516	GCGTCACAGGCAATCTTGCTTCTACTACCATAAAAATAGTTTACGTTTCTTAGACACTTA	intergenic
ASHGA5P035428	0.0305807	2.49468	432.538	173.384	8.32317	7.49724	253.669	172.816	241.222	84.2687	114.945	173.384	927.206	383.651	420.697	188.895	242.244	432.539	9.50792	7.88426	8.25757	7.11535	8.76575	8.30974	7.3432	7.13448	7.74141	7.04237	P	P	P	P	P	P	P	P	P	P	noncoding	ENST00000450443	AC093818.1	GENCODE	1397	chr2	-	173368166	173421324	AGCCAGGAGGTCATTTATGTTGCCTGGATTTGCTATTGTGCTTCTAATTAAGCTATTTCA	natural antisense
ASHGA5P035428	0.0305807	2.49468	432.538	173.384	8.32317	7.49724	253.669	172.816	241.222	84.2687	114.945	173.384	927.206	383.651	420.697	188.895	242.244	432.539	9.50792	7.88426	8.25757	7.11535	8.76575	8.30974	7.3432	7.13448	7.74141	7.04237	P	P	P	P	P	P	P	P	P	P	noncoding	ENST00000450443	AC093818.1	GENCODE	1397	chr2	-	173368166	173421324	AGCCAGGAGGTCATTTATGTTGCCTGGATTTGCTATTGTGCTTCTAATTAAGCTATTTCA	natural antisense
ASHGA5P035428	0.0305807	2.49468	432.538	173.384	8.32317	7.49724	253.669	172.816	241.222	84.2687	114.945	173.384	927.206	383.651	420.697	188.895	242.244	432.539	9.50792	7.88426	8.25757	7.11535	8.76575	8.30974	7.3432	7.13448	7.74141	7.04237	P	P	P	P	P	P	P	P	P	P	noncoding	ENST00000450443	AC093818.1	GENCODE	1397	chr2	-	173368166	173421324	AGCCAGGAGGTCATTTATGTTGCCTGGATTTGCTATTGTGCTTCTAATTAAGCTATTTCA	natural antisense
ASHGA5P038811	0.0274321	2.4895	352.819	141.723	8.17691	7.22734	109.57	257.053	118.389	108.41	115.192	141.723	399.799	486.608	413.213	277.881	186.593	352.819	8.29226	6.57706	8.60045	7.68423	8.73844	7.30299	7.87781	7.52508	7.3756	7.04735	P	P	P	P	P	P	P	P	P	P	noncoding	ENST00000426302	U73166.2	GENCODE	430	chr3	+	50298664	50300744	AGAAATGGGGCAGGTGGAGTACTGGAAGCTACACCAAGCTTCAGAGTGGTCCTGTGGCCT	intergenic
ASHGA5P027947	0.00337204	2.46827	210.434	85.2559	7.36403	6.43216	153.162	108.713	54.2858	55.0521	55.0663	85.2559	442.511	141.144	142.785	189.632	136.1	210.434	8.4462	7.1093	6.88336	6.46741	7.22988	6.19283	7.34829	6.46612	6.91242	5.92515	P	P	P	P	P	P	P	P	P	P	noncoding	uc021orf.1	FW340027	UCSC_knowngene	1832	chr1	-	109965120	109966952	GAGTGAATGAACTAGGTTAGAATTAGGAACTACATGGATCTCAGTCTGTTAAGATAACAA	intron sense-overlapping
ASHGA5P027947	0.00337204	2.46827	210.434	85.2559	7.36403	6.43216	153.162	108.713	54.2858	55.0521	55.0663	85.2559	442.511	141.144	142.785	189.632	136.1	210.434	8.4462	7.1093	6.88336	6.46741	7.22988	6.19283	7.34829	6.46612	6.91242	5.92515	P	P	P	P	P	P	P	P	P	P	noncoding	uc021orf.1	FW340027	UCSC_knowngene	1832	chr1	-	109965120	109966952	GAGTGAATGAACTAGGTTAGAATTAGGAACTACATGGATCTCAGTCTGTTAAGATAACAA	intron sense-overlapping
ASHGA5P027947	0.00337204	2.46827	210.434	85.2559	7.36403	6.43216	153.162	108.713	54.2858	55.0521	55.0663	85.2559	442.511	141.144	142.785	189.632	136.1	210.434	8.4462	7.1093	6.88336	6.46741	7.22988	6.19283	7.34829	6.46612	6.91242	5.92515	P	P	P	P	P	P	P	P	P	P	noncoding	uc021orf.1	FW340027	UCSC_knowngene	1832	chr1	-	109965120	109966952	GAGTGAATGAACTAGGTTAGAATTAGGAACTACATGGATCTCAGTCTGTTAAGATAACAA	intron sense-overlapping
ASHGA5P027947	0.00337204	2.46827	210.434	85.2559	7.36403	6.43216	153.162	108.713	54.2858	55.0521	55.0663	85.2559	442.511	141.144	142.785	189.632	136.1	210.434	8.4462	7.1093	6.88336	6.46741	7.22988	6.19283	7.34829	6.46612	6.91242	5.92515	P	P	P	P	P	P	P	P	P	P	noncoding	uc021orf.1	FW340027	UCSC_knowngene	1832	chr1	-	109965120	109966952	GAGTGAATGAACTAGGTTAGAATTAGGAACTACATGGATCTCAGTCTGTTAAGATAACAA	intron sense-overlapping
ASHGA5P019701	0.0462733	2.46056	631.893	256.808	8.97219	8.17147	278.844	315.003	238.183	156.5	295.511	256.808	327.119	931.479	392.219	704.004	804.644	631.893	8.00587	8.02587	9.54046	7.97029	8.66622	8.2933	9.19954	8.08052	9.44888	8.48738	P	P	P	P	P	P	P	P	P	P	noncoding	ENST00000560545	OIP5-AS1	GENCODE	566	chr15	+	41576207	41577887	CTGTTGGACCGTGCGAGGAGAAGAAAAAAAATATCGGCCAGAGGAGAGGAACTAACCGAA	intergenic
ASHGA5P053098	0.014168	2.46013	176.625	71.7951	7.22281	6.23593	67.9904	106.957	73.801	43.0658	67.161	71.7951	180.233	212.335	114.298	244.042	132.217	176.625	7.17157	5.82617	7.44067	6.44266	6.93146	6.62731	7.69538	6.06062	6.87497	6.22292	P	P	P	M	P	M	P	P	M	P	noncoding	uc003tuh.3	CCT6P1	UCSC_knowngene	1675	chr7	+	65216091	65228662	TTTCTTTTCTTCCTCTGGAGCAGTTATGGCGGCGGCGAAGACCCTGAACCCCAAGGCCAA	intergenic
ASHGA5P053128	0.00520954	2.4589	2486.63	1011.27	10.9638	10.1792	1317.39	1217.46	1065.78	793.83	661.911	1011.27	4053.24	1819.42	1996.43	2628.87	1935.19	2486.63	11.6357	10.3927	10.4854	9.92939	10.9425	10.4077	11.0574	10.4591	10.6977	9.70723	P	P	P	P	P	P	P	P	P	P	noncoding	ENST00000423186	AC004166.7	GENCODE	1055	chr7	-	74299872	74306687	GAAGGGGTGCTGATGGACGTGGACTGTGAGAGCGTCTACCCCATTGTGTAGGCCTCTAAT	intergenic
ASHGA5P013205	0.0329346	2.45848	609.663	247.984	8.81391	8.04927	381.821	229.121	106.987	210.46	311.531	247.984	920.359	330.545	274.714	419.22	1103.48	609.663	9.49535	8.49458	8.05513	7.51554	8.15597	7.15438	8.46428	8.51264	9.8988	8.56919	P	P	P	P	P	P	M	P	P	M	noncoding	NR_024091	ZFP91-CNTF	RefSeq	3544	chr11	+	58346586	58393205	AAGGGATGTCAAAGTCATACTGCAGTGGGACGGAACGGAGCATTCACCGCTGACCCCTCA	exon sense-overlapping
ASHGA5P013205	0.0329346	2.45848	609.663	247.984	8.81391	8.04927	381.821	229.121	106.987	210.46	311.531	247.984	920.359	330.545	274.714	419.22	1103.48	609.663	9.49535	8.49458	8.05513	7.51554	8.15597	7.15438	8.46428	8.51264	9.8988	8.56919	P	P	P	P	P	P	M	P	P	M	noncoding	NR_024091	ZFP91-CNTF	RefSeq	3544	chr11	+	58346586	58393205	AAGGGATGTCAAAGTCATACTGCAGTGGGACGGAACGGAGCATTCACCGCTGACCCCTCA	exon sense-overlapping
ASHGA5P013205	0.0329346	2.45848	609.663	247.984	8.81391	8.04927	381.821	229.121	106.987	210.46	311.531	247.984	920.359	330.545	274.714	419.22	1103.48	609.663	9.49535	8.49458	8.05513	7.51554	8.15597	7.15438	8.46428	8.51264	9.8988	8.56919	P	P	P	P	P	P	M	P	P	M	noncoding	NR_024091	ZFP91-CNTF	RefSeq	3544	chr11	+	58346586	58393205	AAGGGATGTCAAAGTCATACTGCAGTGGGACGGAACGGAGCATTCACCGCTGACCCCTCA	exon sense-overlapping
ASHGA5P042238	0.0274206	2.45692	499.624	203.354	8.57607	7.7459	297.831	297.13	97.6833	140.912	183.213	203.354	1053.99	443.421	301.996	394.64	304.069	499.624	9.67955	8.12662	8.46504	7.88081	8.2933	7.03055	8.38393	7.92815	8.05855	7.76335	P	P	P	P	P	P	P	P	P	P	noncoding	ENST00000451355	RP11-405O10.2	GENCODE	1676	chr6	+	7183315	7185520	CTTTTTGTGTGAAAATGTAGAGCATACCTAGTTCTCAGACCCAATTCCATAGATTAGAAA	intron sense-overlapping
ASHGA5P042238	0.0274206	2.45692	499.624	203.354	8.57607	7.7459	297.831	297.13	97.6833	140.912	183.213	203.354	1053.99	443.421	301.996	394.64	304.069	499.624	9.67955	8.12662	8.46504	7.88081	8.2933	7.03055	8.38393	7.92815	8.05855	7.76335	P	P	P	P	P	P	P	P	P	P	noncoding	ENST00000451355	RP11-405O10.2	GENCODE	1676	chr6	+	7183315	7185520	CTTTTTGTGTGAAAATGTAGAGCATACCTAGTTCTCAGACCCAATTCCATAGATTAGAAA	intron sense-overlapping
ASHGA5P042238	0.0274206	2.45692	499.624	203.354	8.57607	7.7459	297.831	297.13	97.6833	140.912	183.213	203.354	1053.99	443.421	301.996	394.64	304.069	499.624	9.67955	8.12662	8.46504	7.88081	8.2933	7.03055	8.38393	7.92815	8.05855	7.76335	P	P	P	P	P	P	P	P	P	P	noncoding	ENST00000451355	RP11-405O10.2	GENCODE	1676	chr6	+	7183315	7185520	CTTTTTGTGTGAAAATGTAGAGCATACCTAGTTCTCAGACCCAATTCCATAGATTAGAAA	intron sense-overlapping
ASHGA5P042238	0.0274206	2.45692	499.624	203.354	8.57607	7.7459	297.831	297.13	97.6833	140.912	183.213	203.354	1053.99	443.421	301.996	394.64	304.069	499.624	9.67955	8.12662	8.46504	7.88081	8.2933	7.03055	8.38393	7.92815	8.05855	7.76335	P	P	P	P	P	P	P	P	P	P	noncoding	ENST00000451355	RP11-405O10.2	GENCODE	1676	chr6	+	7183315	7185520	CTTTTTGTGTGAAAATGTAGAGCATACCTAGTTCTCAGACCCAATTCCATAGATTAGAAA	intron sense-overlapping
ASHGA5P039566	0.0204442	2.44463	1373.94	562.022	10.1677	9.22202	1031.19	529.661	467.471	252.853	528.937	562.023	1393.56	1255.23	1374.12	1566.22	1280.57	1373.94	10.0675	10.0084	9.94353	8.70871	10.4131	9.2524	10.3104	8.78478	10.1039	9.35577	P	P	P	P	P	P	P	P	M	P	noncoding	ENST00000514608	RP11-21I10.2	GENCODE	974	chr4	-	119990478	119991452	TAGGCAGTGAAACATCCCCCAAATCTGATGGATCTAGAGTCAGGGAAGTCTGCTTTTGTA	intergenic
ASHGA5P026685	0.0390072	2.44222	309.591	126.766	7.82145	7.02304	188.584	198.104	84.6094	96.1415	66.3913	126.766	629.654	421.495	135.598	195.649	165.557	309.591	8.95555	7.43311	8.39146	7.31457	7.16175	6.82291	7.39879	7.33755	7.19968	6.20709	P	P	P	P	P	P	P	P	P	P	noncoding	ENST00000533708	RP11-113K21.5	GENCODE	825	chr11	+	82783159	82784425	CAAAGTTAATTGTCTTTTGAGTGATTTTGCACAGTATCTCAAAATGAACTGTACTTTTTT	bidirectional
ASHGA5P031338	0.0026015	2.43393	618.021	253.918	8.99562	8.0982	365.526	346.57	144.6	158.71	254.186	253.918	855.006	509.246	407.051	780.242	538.557	618.021	9.39534	8.43224	8.66325	8.1064	8.71281	7.58705	9.33054	8.1043	8.87613	8.26103	P	P	P	P	P	P	P	P	P	P	noncoding	TCONS_00007353	XLOC_003397	LincRNAs identified by Cabili et al	5855	chr3	-	195725734	195731964	CCAGGGTTTCACAAAGGCCAGATTTTATTTCAGTTACTCAGAAGAGAAAGAAAATGTCTT	intergenic
ASHGA5P049519	0.0433984	2.42847	5315.48	2188.82	11.9149	11.1747	3270.54	2208.36	1105.09	1049.72	3310.37	2188.82	6756.36	3610.98	4111.98	2214.7	9883.36	5315.48	12.3096	11.6894	11.5006	10.8043	11.9345	10.4526	10.8066	10.882	13.0234	12.0449	P	P	P	P	P	P	P	P	P	P	noncoding	ENST00000484836	C17orf76-AS1	GENCODE	821	chr17	+	16342658	16345056	ATTCACCTAGGTTGCAAATTCGTGAAGAATCAGCATCATGTTTGGCAGCTGAGTATTGGA	intergenic
ASHGA5P018555	0.0248042	2.42635	266.2	109.712	7.74833	6.91929	122.361	113.989	122.606	120.783	68.8199	109.712	142.271	183.404	381.078	394.031	230.214	266.2	6.82946	6.7507	7.2435	6.52844	8.62155	7.35158	8.38238	7.70196	7.66474	6.26379	P	P	M	M	P	P	P	P	P	P	noncoding	ENST00000580440	AC005154.6	GENCODE	791	chr7	-	30617200	30634376	AGTAACATATATTGGCGAGCCAGCCAGGAGACCACTACAGGAAACACTCCATTTATTCCA	natural antisense
ASHGA5P048294	0.000720169	2.42525	3530.55	1455.75	11.4969	10.7382	1279.91	2023.01	1370.24	1327.6	1277.99	1455.75	2623.91	2936.8	3583.25	5129.23	3379.58	3530.55	11.0007	10.3511	11.199	10.6804	11.7386	10.7526	12.0182	11.2318	11.5278	10.675	P	P	P	P	P	P	P	P	P	P	noncoding	ENST00000532875	CTD-2313N18.4	GENCODE	549	chr11	-	71511586	71515686	TCTTGGTGTCTCAGGGCAAACCCTTTCGAGCAGCGCCTCCCAGTGGCCGGAAGCTGAAAT	natural antisense
ASHGA5P048294	0.000720169	2.42525	3530.55	1455.75	11.4969	10.7382	1279.91	2023.01	1370.24	1327.6	1277.99	1455.75	2623.91	2936.8	3583.25	5129.23	3379.58	3530.55	11.0007	10.3511	11.199	10.6804	11.7386	10.7526	12.0182	11.2318	11.5278	10.675	P	P	P	P	P	P	P	P	P	P	noncoding	ENST00000532875	CTD-2313N18.4	GENCODE	549	chr11	-	71511586	71515686	TCTTGGTGTCTCAGGGCAAACCCTTTCGAGCAGCGCCTCCCAGTGGCCGGAAGCTGAAAT	natural antisense
ASHGA5P048294	0.000720169	2.42525	3530.55	1455.75	11.4969	10.7382	1279.91	2023.01	1370.24	1327.6	1277.99	1455.75	2623.91	2936.8	3583.25	5129.23	3379.58	3530.55	11.0007	10.3511	11.199	10.6804	11.7386	10.7526	12.0182	11.2318	11.5278	10.675	P	P	P	P	P	P	P	P	P	P	noncoding	ENST00000532875	CTD-2313N18.4	GENCODE	549	chr11	-	71511586	71515686	TCTTGGTGTCTCAGGGCAAACCCTTTCGAGCAGCGCCTCCCAGTGGCCGGAAGCTGAAAT	natural antisense
ASHGA5P014826	0.0111605	2.42139	124.349	51.3546	6.72762	5.75027	62.9545	69.1269	44.6883	32.9106	47.0928	51.3546	200.167	87.8061	83.8144	110.433	139.526	124.349	7.32117	5.70275	6.23704	5.8414	6.50768	5.90146	6.62112	5.59906	6.95109	5.70667	P	P	P	P	P	P	P	P	P	P	noncoding	ENST00000413755	RP4-564F22.2	GENCODE	648	chr20	-	37050838	37063996	AAGACACTGGCGGGAGTGTAACATGACTGCCGCCCCATGTGTGTGAGAGGCGTCCTCTGG	intergenic
ASHGA5P019563	0.0172585	2.421	933.926	385.761	9.46027	8.61993	548.399	450.968	218.572	141.04	569.825	385.761	1067.81	704.217	833.258	352.194	1712.15	933.926	9.69297	9.04638	9.13731	8.47881	9.72507	8.17136	8.22477	7.92943	10.5212	9.47367	P	P	P	P	P	P	P	P	P	P	noncoding	ENST00000492250	C17orf76-AS1	GENCODE	565	chr17	+	16342351	16344816	TTCCCGTTGTTATGGAGATTGCGTACCCACTGCAGAGTGCTGAAGACGGGGTAGCCACGA	intergenic
ASHGA5P026139	0.00515249	2.41642	59.3612	24.5658	5.7049	4.63105	27.3964	31.8709	23.4064	23.198	16.9573	24.5658	84.4442	70.7286	43.4399	60.8368	37.3566	59.3612	6.07278	4.30106	5.95039	4.75652	5.57238	4.89201	5.79992	4.97031	5.12901	4.23537	P	P	P	P	P	P	P	P	P	P	noncoding	uc001lxy.2	LOC650368	UCSC_knowngene	2507	chr11	+	3402190	3430378	ATAATTCTTCAGTCCTTGAAGAGCATCCAGCACAGAAGGTAGAAACCCTCCTTAAGGCTC	intergenic
ASHGA5P000085	0.00402628	2.41323	2512.68	1041.21	11.0288	10.2387	1104.1	1506.49	787.089	913.295	895.081	1041.21	2916.11	2673.35	1889.44	2482.48	2602.01	2512.68	11.1436	10.1228	11.0465	10.2487	10.8626	9.99018	10.9596	10.6779	11.1315	10.1539	P	P	P	P	P	P	P	P	P	P	noncoding	AY203949		LincRNAs identified by Khalil et al	1269	chr3	-	129080559	129082577	CACGTCAGAGAAGTGAGGAGCCCCTCCGCCTGCAGCCACCCCGTCCGGGAGGGAGGTGGG	intergenic
ASHGA5P019269	0.0362245	2.4109	1125.5	466.84	9.73265	8.92357	647.996	542.87	250.919	200.01	692.406	466.84	1288.13	819.2	1065.28	443.391	2011.52	1125.5	9.96211	9.29631	9.34551	8.74243	10.0518	8.3654	8.54403	8.44081	10.7598	9.77288	P	P	M	M	P	P	P	P	M	P	noncoding	NR_045028	C17orf76-AS1	RefSeq	1202	chr17	+	16342300	16345340	AACCCGAGAGAACTGGATTGCGTACCCACTGCAGAGTGCTGAAGACGGGGTAGCCACGAG	natural antisense
ASHGA5P019269	0.0362245	2.4109	1125.5	466.84	9.73265	8.92357	647.996	542.87	250.919	200.01	692.406	466.84	1288.13	819.2	1065.28	443.391	2011.52	1125.5	9.96211	9.29631	9.34551	8.74243	10.0518	8.3654	8.54403	8.44081	10.7598	9.77288	P	P	M	M	P	P	P	P	M	P	noncoding	NR_045028	C17orf76-AS1	RefSeq	1202	chr17	+	16342300	16345340	AACCCGAGAGAACTGGATTGCGTACCCACTGCAGAGTGCTGAAGACGGGGTAGCCACGAG	natural antisense
ASHGA5P054917	0.0122431	2.4045	420.474	174.869	8.49319	7.5728	281.958	179.413	166.694	130.634	115.648	174.869	424.046	355.04	368.093	480.716	474.476	420.474	8.37364	8.04216	8.15237	7.1713	8.57826	7.77905	8.66204	7.81885	8.69962	7.05266	P	M	P	M	P	P	P	M	M	P	noncoding	ENST00000537024	SNHG1	GENCODE	532	chr11	-	62621018	62622951	AAGTAGGCAGTTTCTATGATGAATCAAACTAGCTCACTATGACCGACAGTGAAAATACAT	bidirectional
ASHGA5P054917	0.0122431	2.4045	420.474	174.869	8.49319	7.5728	281.958	179.413	166.694	130.634	115.648	174.869	424.046	355.04	368.093	480.716	474.476	420.474	8.37364	8.04216	8.15237	7.1713	8.57826	7.77905	8.66204	7.81885	8.69962	7.05266	P	M	P	M	P	P	P	M	M	P	noncoding	ENST00000537024	SNHG1	GENCODE	532	chr11	-	62621018	62622951	AAGTAGGCAGTTTCTATGATGAATCAAACTAGCTCACTATGACCGACAGTGAAAATACAT	bidirectional
ASHGA5P054917	0.0122431	2.4045	420.474	174.869	8.49319	7.5728	281.958	179.413	166.694	130.634	115.648	174.869	424.046	355.04	368.093	480.716	474.476	420.474	8.37364	8.04216	8.15237	7.1713	8.57826	7.77905	8.66204	7.81885	8.69962	7.05266	P	M	P	M	P	P	P	M	M	P	noncoding	ENST00000537024	SNHG1	GENCODE	532	chr11	-	62621018	62622951	AAGTAGGCAGTTTCTATGATGAATCAAACTAGCTCACTATGACCGACAGTGAAAATACAT	bidirectional
ASHGA5P021103	0.000776227	2.40321	80.0955	33.3285	6.14188	5.03306	27.8098	56.7644	30.7271	23.599	27.7423	33.3285	49.3724	96.9293	86.2802	70.0748	97.8209	80.0955	5.3376	4.32683	6.37088	5.55929	6.54536	5.3314	5.99088	5.00118	6.46467	4.94662	P	P	P	P	P	P	P	P	P	P	noncoding	ENST00000525180	FAM86C2P	GENCODE	435	chr11	-	67564153	67572807	ATTTTGCAGAAGCACGAGGCTGTCCACACAGAGCCTTTGGACGAGCTGTACGAGGTGCTG	intergenic
ASHGA5P019151	0.0373174	2.40145	7128.2	2968.28	12.3415	11.6052	4314.15	2981.08	1466.53	1405.99	4673.65	2968.28	10690.2	4868.45	5078.06	2999.14	12005.2	7128.2	13.0002	12.0805	11.9594	11.2536	12.2477	10.8477	11.2277	11.3134	13.2726	12.531	P	P	P	P	P	P	P	P	P	P	noncoding	NR_027158	C17orf76-AS1	RefSeq	892	chr17	+	16342300	16345340	AGAGAACTGGGTTGCAAATTCGTGAAGAATCAGCATCATGTTTGGCAGCTGAGTATTGGA	natural antisense
ASHGA5P019151	0.0373174	2.40145	7128.2	2968.28	12.3415	11.6052	4314.15	2981.08	1466.53	1405.99	4673.65	2968.28	10690.2	4868.45	5078.06	2999.14	12005.2	7128.2	13.0002	12.0805	11.9594	11.2536	12.2477	10.8477	11.2277	11.3134	13.2726	12.531	P	P	P	P	P	P	P	P	P	P	noncoding	NR_027158	C17orf76-AS1	RefSeq	892	chr17	+	16342300	16345340	AGAGAACTGGGTTGCAAATTCGTGAAGAATCAGCATCATGTTTGGCAGCTGAGTATTGGA	natural antisense
ASHGA5P023522	0.0467504	2.40043	6504.68	2709.8	12.1981	11.4645	3931.49	2639.24	1300.43	1290.14	4387.7	2709.8	10227.2	4496.35	4430.53	2563.01	10806.3	6504.68	12.9399	11.9454	11.8387	11.0641	12.0652	10.6814	11.0076	11.1895	13.139	12.4423	P	P	P	P	P	P	P	P	P	P	noncoding	NR_045021	C17orf76-AS1	RefSeq	928	chr17	+	16342300	16345340	CAGTGGGGGTGTTGCAAATTCGTGAAGAATCAGCATCATGTTTGGCAGCTGAGTATTGGA	natural antisense
ASHGA5P023522	0.0467504	2.40043	6504.68	2709.8	12.1981	11.4645	3931.49	2639.24	1300.43	1290.14	4387.7	2709.8	10227.2	4496.35	4430.53	2563.01	10806.3	6504.68	12.9399	11.9454	11.8387	11.0641	12.0652	10.6814	11.0076	11.1895	13.139	12.4423	P	P	P	P	P	P	P	P	P	P	noncoding	NR_045021	C17orf76-AS1	RefSeq	928	chr17	+	16342300	16345340	CAGTGGGGGTGTTGCAAATTCGTGAAGAATCAGCATCATGTTTGGCAGCTGAGTATTGGA	natural antisense
ASHGA5P054251	0.0469988	2.39593	193.948	80.9487	7.28093	6.45994	96.826	100.5	80.7791	60.4458	66.1921	80.9487	235.608	237.531	258.421	168.426	69.7515	193.948	7.55757	6.37643	7.59408	6.34917	8.07178	6.75585	7.18506	6.61479	5.99615	6.20345	P	P	P	P	P	P	P	P	P	P	noncoding	ENST00000522600	RP11-1149O23.3	GENCODE	632	chr8	+	23083146	23085720	ATTCTGCCTTTCTTCTGGATTTTCCTAACCTGTTAAGAGTCTTGAAAGTCCTTAAACCAC	bidirectional
ASHGA5P032860	0.0395425	2.39404	219.618	91.7352	7.46271	6.64175	93.3423	132.059	72.8769	81.8874	78.5109	91.7352	130.431	391.219	154.291	171.869	250.28	219.618	6.69658	6.31888	8.28719	6.73198	7.32657	6.60958	7.21702	7.0911	7.78619	6.45718	M	P	P	P	P	P	P	P	P	P	noncoding	ENST00000458492	AC005224.2	GENCODE	1537	chr17	+	14113804	14121239	AAATTTCTGTCTCTATAGTGTCTCGGAAAAAAGAAAGAAAGTGGAAAGGCAGGTTGAGAA	intergenic
ASHGA5P040294	0.00895066	2.38901	342.957	143.556	8.16562	7.27282	190.577	199.783	132.829	109.94	84.6523	143.556	504.416	267.605	391.613	299.098	252.052	342.957	8.63142	7.44913	7.7554	7.32979	8.66285	7.46696	7.98413	7.54379	7.79432	6.57443	P	M	P	P	P	P	P	P	P	P	noncoding	uc021xwe.1	AK126225	UCSC_knowngene	1694	chr5	-	1317869	1319563	GAAAATAAATCGAGGATGCCAAGTCCTCCTCTTAGAAAAATAGCCCCTGCAGTGGGGTTT	exon sense-overlapping
ASHGA5P040105	0.0453682	2.38334	1320.79	554.178	9.89115	9.1111	368.307	1260.89	354.274	307.944	479.472	554.178	963.43	2651.64	636.528	1728.5	623.875	1320.79	9.5586	8.44165	11.034	9.97943	9.32634	8.85351	10.4533	9.06852	9.08348	9.2124	P	P	P	P	P	P	P	P	P	P	noncoding	uc003ifn.3	AK090904	UCSC_knowngene	2963	chr4	+	128758921	128761884	GCATCTTTATGCTAGTGAACAAAGTAGCAATAAATGTTCATTTTTGGATGGCAGTACACA	intergenic
ASHGA5P044655	0.00795073	2.37223	132.782	55.9735	6.84892	5.91801	58.6217	68.0007	38.0168	66.3076	48.9206	55.9735	167.456	122.155	110.872	167.666	95.7617	132.782	7.06247	5.58599	6.68015	5.81706	6.88729	5.66489	7.1779	6.76202	6.43678	5.76008	P	P	P	P	P	P	P	P	P	P	noncoding	uc009viv.2	WASH7P	UCSC_knowngene	3181	chr1	-	14406	29370	ACATTTTTCATTTCAGCTTCACTGCTGTGTCTCCCAGTGTAACCCTAGCATCCAGAAGTG	intergenic
ASHGA5P046610	0.0145199	2.37085	165.673	69.8791	7.15385	6.06294	116.271	107.462	47.1753	30.9953	47.4923	69.8791	220.179	126.455	215.713	128.785	137.233	165.673	7.46214	6.67133	6.72522	6.45171	7.82444	5.98393	6.83082	5.48834	6.92662	5.71936	P	P	P	P	P	P	P	P	P	P	noncoding	NR_038988	LINC00630	RefSeq	2117	chrX	+	102024094	102140338	ACCGTTATTATTTCCCAATAATACAAACATCACAATTTCAGTTCTGTAGTACCTGGCCTA	intergenic
ASHGA5P049518	0.0382903	2.36545	1630.14	689.146	10.2449	9.48093	1009.51	764.031	384.641	265.466	1022.08	689.146	1802.1	1196.53	1533.25	604.805	3014.03	1630.14	10.445	9.97848	9.87809	9.24269	10.5693	8.96915	8.9793	8.85185	11.353	10.3625	P	P	P	P	P	M	P	P	P	P	noncoding	NR_027164	C17orf76-AS1	RefSeq	1072	chr17	+	16342300	16345340	TTACTCCCTCTTTAAGATTGCGTACCCACTGCAGAGTGCTGAAGACGGGGTAGCCACGAG	natural antisense
ASHGA5P049518	0.0382903	2.36545	1630.14	689.146	10.2449	9.48093	1009.51	764.031	384.641	265.466	1022.08	689.146	1802.1	1196.53	1533.25	604.805	3014.03	1630.14	10.445	9.97848	9.87809	9.24269	10.5693	8.96915	8.9793	8.85185	11.353	10.3625	P	P	P	P	P	M	P	P	P	P	noncoding	NR_027164	C17orf76-AS1	RefSeq	1072	chr17	+	16342300	16345340	TTACTCCCTCTTTAAGATTGCGTACCCACTGCAGAGTGCTGAAGACGGGGTAGCCACGAG	natural antisense
ASHGA5P042816	0.0363961	2.36397	154.724	65.4511	7.033	6.08067	44.7938	109.604	63.7046	56.9417	52.2111	65.4511	122.262	156.168	98.3511	153.784	243.056	154.724	6.60347	5.14525	7.02552	6.47906	6.72682	6.41727	7.06306	6.51479	7.74613	5.84697	P	P	P	P	P	P	P	P	P	P	noncoding	TCONS_00019358	XLOC_009185	LincRNAs identified by Cabili et al	388	chr11	+	68039586	68042158	TACATCCTCTACCTTTTGTTTCCAGGCACAGATCATTTCAGGTGCCTTCTGTGCAGAAAT	intergenic
ASHGA5P048651	0.0144388	2.36285	130.087	55.055	6.77517	5.87366	61.8279	74.432	50.1442	38.4328	50.4382	55.055	144.167	200.157	68.6991	109.269	128.142	130.087	6.8526	5.6705	7.35665	5.94381	6.22825	6.07879	6.60534	5.87246	6.83304	5.80272	P	P	P	P	P	P	P	P	P	P	noncoding	ENST00000560706	OIP5-AS1	GENCODE	473	chr15	+	41576205	41590267	CTGCGAAGATGGCGGAGTAAGGCGTGCCGCTGCAAACTGGCCTCTGGGCCGGGGGCGAGC	intergenic
ASHGA5P025867	0.039758	2.35862	5407.81	2292.78	11.9537	11.2432	3229.73	2411.04	1147.85	1108.23	3567.05	2292.78	7905.21	3829.35	3910.57	2323.61	9070.32	5407.81	12.5369	11.6693	11.5928	10.9318	11.8657	10.5016	10.8676	10.9703	12.9055	12.1431	P	P	P	P	P	P	P	P	M	P	noncoding	NR_045025	C17orf76-AS1	RefSeq	547	chr17	+	16342300	16373962	TGTTATGGAGGTTGCAAATTCGTGAAGAATCAGCATCATGTTTGGCAGCTGAGTATTGGA	intronic antisense
ASHGA5P025867	0.039758	2.35862	5407.81	2292.78	11.9537	11.2432	3229.73	2411.04	1147.85	1108.23	3567.05	2292.78	7905.21	3829.35	3910.57	2323.61	9070.32	5407.81	12.5369	11.6693	11.5928	10.9318	11.8657	10.5016	10.8676	10.9703	12.9055	12.1431	P	P	P	P	P	P	P	P	M	P	noncoding	NR_045025	C17orf76-AS1	RefSeq	547	chr17	+	16342300	16373962	TGTTATGGAGGTTGCAAATTCGTGAAGAATCAGCATCATGTTTGGCAGCTGAGTATTGGA	intronic antisense
ASHGA5P053428	0.0374106	2.35438	568.849	241.613	8.75048	8.02325	419.939	216.093	241.323	134.521	196.188	241.613	894.009	257.017	906.481	320.015	466.724	568.849	9.45723	8.63513	7.70157	7.43711	9.83643	8.31036	8.08052	7.86072	8.67663	7.8729	P	P	P	P	P	P	P	P	P	P	noncoding	ENST00000449589	GAS5	GENCODE	712	chr1	-	173833153	173837127	CCATTGGATGTGCCACAATGATGACAGTTTATTTGCTACTCTTGAGTGCTAGAATGATGA	bidirectional
ASHGA5P053428	0.0374106	2.35438	568.849	241.613	8.75048	8.02325	419.939	216.093	241.323	134.521	196.188	241.613	894.009	257.017	906.481	320.015	466.724	568.849	9.45723	8.63513	7.70157	7.43711	9.83643	8.31036	8.08052	7.86072	8.67663	7.8729	P	P	P	P	P	P	P	P	P	P	noncoding	ENST00000449589	GAS5	GENCODE	712	chr1	-	173833153	173837127	CCATTGGATGTGCCACAATGATGACAGTTTATTTGCTACTCTTGAGTGCTAGAATGATGA	bidirectional
ASHGA5P014540	0.0223372	2.35407	292.201	124.126	7.92535	7.04709	99.3603	206.264	120.792	104.422	89.7908	124.126	267.051	456.452	196.001	244.947	296.551	292.201	7.72169	6.41646	8.50259	7.3707	7.67762	7.3286	7.69975	7.46214	8.02509	6.65756	P	P	P	P	P	P	P	P	P	P	noncoding	ENST00000409898	LINC00152	GENCODE	560	chr2	+	87754994	87906258	CCTAACAATGGCTCTGCCGACTTCCAGTTCTGGAACAAGATGGTTAAACTCATTTTTCCC	intergenic
ASHGA5P044310	0.0416774	2.33952	343.998	147.038	8.17806	7.18628	229.494	231.111	117.751	98.9107	57.9214	147.038	512.236	244.067	300.843	332.978	329.867	343.998	8.65092	7.72639	7.63316	7.52743	8.28567	7.29294	8.13828	7.37981	8.18229	6.00484	P	P	P	P	P	P	P	P	P	P	noncoding	ENST00000502076	SNHG6	GENCODE	2578	chr8	-	67834229	67837776	TGTGTACTCACTATGACCATTATGTCTTAAAATCAAAACTGCCACAGTGAAGGATATCAT	natural antisense
ASHGA5P020168	0.0474657	2.33596	128.72	55.1035	6.70403	5.79656	57.7233	99.5143	37.0433	41.3126	39.9241	55.1035	174.593	151.15	45.4628	108.429	163.963	128.72	7.12616	5.56069	6.98128	6.33489	5.63699	5.62973	6.59368	5.99222	7.18206	5.4653	P	P	P	P	P	P	P	P	P	P	noncoding	ENST00000508973	RP11-823P9.1	GENCODE	1305	chr5	+	21459621	21474548	CAAAACACTGGTTCAACCCAATGGAAATGGATTGAAAGAGTGAAAGTCACTGGTCTCAAA	intergenic
ASHGA5P014050	0.029262	2.33145	566.116	242.817	8.84622	8.04278	256.636	386.565	225.546	134.526	210.815	242.818	625.27	585.952	368.6	352.899	897.858	566.116	8.94499	7.90343	8.86321	8.25837	8.58071	8.21167	8.22738	7.8611	9.61483	7.97931	P	P	P	P	P	P	M	P	P	P	noncoding	ENST00000399070	ZNF271	GENCODE	5124	chr18	+	32870245	32890730	CCAAGTCGAGGATTTTTCTGGTGGTCTAGTCTCAGAGATTACATCTGTAGTCAGCACAAT	bidirectional
ASHGA5P014050	0.029262	2.33145	566.116	242.817	8.84622	8.04278	256.636	386.565	225.546	134.526	210.815	242.818	625.27	585.952	368.6	352.899	897.858	566.116	8.94499	7.90343	8.86321	8.25837	8.58071	8.21167	8.22738	7.8611	9.61483	7.97931	P	P	P	P	P	P	M	P	P	P	noncoding	ENST00000399070	ZNF271	GENCODE	5124	chr18	+	32870245	32890730	CCAAGTCGAGGATTTTTCTGGTGGTCTAGTCTCAGAGATTACATCTGTAGTCAGCACAAT	bidirectional
ASHGA5P038821	0.0397589	2.3262	162.645	69.9189	7.07305	6.24647	66.9749	93.0589	68.7503	55.4602	65.3502	69.9189	131.534	218.333	85.1355	138.707	239.516	162.645	6.70907	5.80171	7.47708	6.24158	6.52756	6.52934	6.92621	6.47633	7.72532	6.18337	P	P	P	P	P	P	P	P	P	P	noncoding	ENST00000464958	RP5-1157M23.2	GENCODE	1056	chr3	+	52273315	52275113	AAGGTCATGTGCCCTGTAAAAATGTCCCTCACTGGATGAACTGTGACAAAGTAGGGTACT	bidirectional
ASHGA5P028420	0.0414025	2.32593	535.323	230.154	8.79835	7.90233	314.309	289.159	273.596	184.633	89.0745	230.154	856.306	496.893	455.026	444.773	423.62	535.323	9.39922	8.20568	8.6306	7.84273	8.86904	8.48774	8.54796	8.32892	8.54494	6.64659	P	P	P	P	P	P	P	P	P	P	noncoding	ENST00000423023	PSPC1-OT1	GENCODE	376	chr13	-	20248763	20250024	GAAAAATATACTATGGAGATTAGATCCTGTTTACTAGTGAAGACTCTGTCTCTTTTCCAG	intergenic
ASHGA5P020260	0.00130533	2.32036	290.974	125.4	7.88455	7.00824	97.7863	243.626	86.7696	89.567	109.252	125.4	196.235	431.022	158.892	349.658	319.061	290.974	7.2887	6.39216	8.42416	7.6057	7.36684	6.85961	8.21339	7.22183	8.12966	6.9619	P	P	P	P	P	P	P	P	P	P	noncoding	ENST00000510565	FAM86EP	GENCODE	741	chr4	-	3944637	3957135	TCACTCACAGGCCAGGCCAGGATCAGATGGGAAGTGGAAGCTTGTCATGACCAGAAACTG	intergenic
ASHGA5P021158	0.00162304	2.32015	88.9627	38.3436	6.29765	5.29509	53.6524	49.1599	31.7843	26.2899	30.8316	38.3436	82.5524	119.321	90.0852	88.3881	64.4666	88.9627	6.03902	5.442	6.64742	5.36257	6.60418	5.38495	6.31204	5.19145	5.8856	5.09447	P	P	M	P	P	P	P	P	P	P	noncoding	ENST00000526617	RP11-540A21.3	GENCODE	488	chr11	+	9806697	9812784	TGATAGGAAGGGAAACAGATCCAGATGGAGGAAACATCTGATAAAGTTTGCCTAAGCAGC	natural antisense
ASHGA5P017167	0.0409438	2.31862	85.2502	36.7676	6.12142	5.21847	49.3696	49.5061	33.2155	23.3174	28.4297	36.7676	73.2784	135.805	52.0115	41.5995	123.557	85.2502	5.86906	5.30203	6.82573	5.37132	5.83032	5.45774	5.29875	4.97821	6.78326	4.98306	P	P	P	P	P	P	P	P	P	P	noncoding	NR_038429	LOC100506054	RefSeq	1329	chr2	+	3605975	3609340	AGTTGAGAAGGCCTTGGGGATGAAGGTGAGAAATTCGAGAATCCCCGGAGATAACACATC	natural antisense
ASHGA5P041671	0.0479881	2.31838	486.118	209.68	8.65369	7.8264	303.457	243.79	225.475	111.438	164.242	209.68	430.976	725.203	293.943	525.513	454.957	486.119	8.40083	8.15351	9.18516	7.60689	8.25174	8.21086	8.79096	7.56336	8.63976	7.59739	P	P	P	P	P	P	P	P	P	P	noncoding	ENST00000566170	RP1-223E5.4	GENCODE	1045	chr6	-	13614342	13615387	CAAATGTCTGTGTAGTTTCTGCACTTCATAACAGCTTATATGACAGTTGCTCCAGCCATT	natural antisense
ASHGA5P041671	0.0479881	2.31838	486.118	209.68	8.65369	7.8264	303.457	243.79	225.475	111.438	164.242	209.68	430.976	725.203	293.943	525.513	454.957	486.119	8.40083	8.15351	9.18516	7.60689	8.25174	8.21086	8.79096	7.56336	8.63976	7.59739	P	P	P	P	P	P	P	P	P	P	noncoding	ENST00000566170	RP1-223E5.4	GENCODE	1045	chr6	-	13614342	13615387	CAAATGTCTGTGTAGTTTCTGCACTTCATAACAGCTTATATGACAGTTGCTCCAGCCATT	natural antisense
ASHGA5P041671	0.0479881	2.31838	486.118	209.68	8.65369	7.8264	303.457	243.79	225.475	111.438	164.242	209.68	430.976	725.203	293.943	525.513	454.957	486.119	8.40083	8.15351	9.18516	7.60689	8.25174	8.21086	8.79096	7.56336	8.63976	7.59739	P	P	P	P	P	P	P	P	P	P	noncoding	ENST00000566170	RP1-223E5.4	GENCODE	1045	chr6	-	13614342	13615387	CAAATGTCTGTGTAGTTTCTGCACTTCATAACAGCTTATATGACAGTTGCTCCAGCCATT	natural antisense
ASHGA5P052682	0.0471438	2.31255	112.728	48.7461	6.49722	5.693	49.4747	63.2496	31.352	48.8805	50.7735	48.7461	170.169	65.882	55.3586	185.584	86.6445	112.728	7.08975	5.30782	5.85769	5.71042	5.92156	5.3641	7.32019	6.27086	6.29688	5.81181	P	P	P	P	P	P	P	P	P	P	noncoding	NR_037177	LOC100294145	RefSeq	3690	chr6	+	32861952	32871535	AACCCCAAGGGTAGGTACCTATTGTGCGGAGTCTCGGAACGCCTGCCTGGAAGAAGAGTT	intergenic
ASHGA5P050981	0.0201938	2.305	20997.6	9109.62	14.1114	13.3751	12051.7	11655.1	8567.06	6425.09	6849.13	9109.62	23717.5	18020.5	22722.1	16650.9	23877.2	20997.6	14.2004	13.6376	13.9459	13.285	14.3667	13.3701	13.6657	13.5153	14.3781	13.0672	P	P	P	P	P	P	P	P	P	P	noncoding	ENST00000423536	RP4-564F22.2	GENCODE	517	chr20	-	37049234	37059709	TTTGAATTTGTAGCTGTCGTTCACTTTTTACCCACCCATTCAATAAACCTTACAGAATTG	intergenic
ASHGA5P015330	0.0306099	2.29444	3632.05	1582.98	11.5366	10.7486	1848.84	2590.23	1657.48	820.81	997.537	1582.98	2804.68	4041.3	2896.52	5346.66	3071.08	3632.05	11.0858	10.8614	11.6673	11.031	11.4623	11.0191	12.086	10.5075	11.3818	10.3239	P	P	P	P	P	P	P	P	P	P	noncoding	ENST00000426828	CCT6P3	GENCODE	2238	chr7	+	64498737	64535091	TTGCCTCCAGCAAATTCAACACCCAACAGCTTCCTTAATAGCAAAGGTAGCAACAGCCCA	intergenic
ASHGA5P050373	0.0326293	2.2938	82.0239	35.759	6.0739	5.1983	44.5453	45.5055	31.203	23.8031	33.738	35.759	65.2937	106.115	48.3251	46.1223	144.263	82.0239	5.7126	5.13814	6.49043	5.25611	5.72996	5.35675	5.43515	5.01487	7.00136	5.22564	P	P	P	P	P	P	P	P	P	P	noncoding	uc002qxu.3	LOC100506054	UCSC_knowngene	1373	chr2	+	3605975	3609340	TATTTTGTCAGGCCTTGGGGATGAAGGTGAGAAATTCGAGAATCCCCGGAGATAACACAT	natural antisense
ASHGA5P016221	0.002824	2.29297	870.012	379.426	9.52107	8.70622	403.777	606.646	350.217	255.077	281.412	379.426	871.389	940.105	631.857	991.892	914.815	870.012	9.42416	8.57854	9.55649	8.91028	9.31609	8.82874	9.66416	8.7976	9.64443	8.41593	P	P	P	P	P	P	P	P	P	P	noncoding	NR_045512	WBSCR22	RefSeq	1159	chr7	+	73097897	73112551	GTTGCATCAGGTCCGGGGATCCCGAGCTGTCCTGCAGCTGTACCCTGAGAACTCAGAGCA	exon sense-overlapping
ASHGA5P016221	0.002824	2.29297	870.012	379.426	9.52107	8.70622	403.777	606.646	350.217	255.077	281.412	379.426	871.389	940.105	631.857	991.892	914.815	870.012	9.42416	8.57854	9.55649	8.91028	9.31609	8.82874	9.66416	8.7976	9.64443	8.41593	P	P	P	P	P	P	P	P	P	P	noncoding	NR_045512	WBSCR22	RefSeq	1159	chr7	+	73097897	73112551	GTTGCATCAGGTCCGGGGATCCCGAGCTGTCCTGCAGCTGTACCCTGAGAACTCAGAGCA	exon sense-overlapping
ASHGA5P018317	0.0318421	2.2921	277.622	121.121	7.84946	7.00047	88.1464	203.248	125.232	99.7861	89.1947	121.121	251.048	430.726	175.554	247.033	283.75	277.622	7.64245	6.22746	8.42322	7.35127	7.51152	7.38007	7.71335	7.3953	7.95675	6.64826	P	P	P	P	P	P	P	P	P	P	noncoding	ENST00000451884	AC068491.1	GENCODE	423	chr2	-	112005726	112123291	TGCTTCCTAAGGCTCTGCCGACTTCCAGTTCTGGAACAAGATGGTTAAACTCATTTTTCC	intergenic
ASHGA5P017103	0.0335955	2.29057	119.257	52.0645	6.65951	5.74749	72.8938	55.9482	40.9421	29.7984	60.7399	52.0645	68.355	157.811	126.317	88.3189	155.483	119.257	5.77442	5.933	7.03764	5.53835	7.06093	5.77585	6.31081	5.41664	7.11374	6.07362	P	P	P	P	P	P	P	P	P	P	noncoding	ENST00000437691	RP11-261C10.2	GENCODE	346	chr1	-	243211038	243215554	TCTGAGCCAGTTGCAGGACAAATTCGAGCATCTTAAAATGATTCAACAGGAGGAGATAAG	intergenic
ASHGA5P015954	0.00739906	2.29028	141.536	61.7987	6.72543	5.85516	104.799	63.6778	29.8999	26.449	84.1685	61.7987	192.802	139.941	64.7109	48.1917	262.035	141.536	7.26553	6.50448	6.87112	5.71902	6.14265	5.28366	5.49386	5.20285	7.854	6.56579	P	P	P	P	P	P	P	P	P	P	noncoding	ENST00000425159	MRPL45P2	GENCODE	927	chr17	-	45527933	45569858	CAATGGAACCAATTGTTTTACAGTCTGTTCCACATGATCATTGTAATAAGGGTTAGAATA	intergenic
ASHGA5P020634	0.0496694	2.28875	148.302	64.7961	6.91441	6.13518	74.9438	70.7922	76.5624	51.7845	49.8976	64.7961	198.667	188.085	175.912	121.371	57.474	148.302	7.31045	5.97265	7.27568	5.87568	7.51448	6.67943	6.75286	6.36241	5.71856	5.78573	P	P	P	P	P	P	P	P	P	P	noncoding	ENST00000517774	RP11-1149O23.3	GENCODE	499	chr8	+	23081983	23083395	TCCCATGGAGGTCTCCATGCCAGTGAAATGTCACCTCAACTCCACCGTCCCTGGTGTCAG	natural antisense
ASHGA5P049633	0.0250394	2.28232	4861.91	2130.25	11.902	11.2139	3159.21	2827.43	1399.91	1279.87	1984.84	2130.25	6058.76	7092.96	2738.06	3213.83	5205.93	4861.91	12.1761	11.6418	12.508	11.1583	11.3684	10.781	11.3291	11.1774	12.1284	11.3109	P	P	P	P	P	P	P	P	P	P	noncoding	ENST00000531465	HMGB1P24	GENCODE	328	chr17	-	35501059	35501387	ACAACTAAACATGGGCAAAGGAGATCCTAAGAAGCCTAGAGGCAAGATGTTGTCATACGC	intron sense-overlapping
ASHGA5P049633	0.0250394	2.28232	4861.91	2130.25	11.902	11.2139	3159.21	2827.43	1399.91	1279.87	1984.84	2130.25	6058.76	7092.96	2738.06	3213.83	5205.93	4861.91	12.1761	11.6418	12.508	11.1583	11.3684	10.781	11.3291	11.1774	12.1284	11.3109	P	P	P	P	P	P	P	P	P	P	noncoding	ENST00000531465	HMGB1P24	GENCODE	328	chr17	-	35501059	35501387	ACAACTAAACATGGGCAAAGGAGATCCTAAGAAGCCTAGAGGCAAGATGTTGTCATACGC	intron sense-overlapping
ASHGA5P049633	0.0250394	2.28232	4861.91	2130.25	11.902	11.2139	3159.21	2827.43	1399.91	1279.87	1984.84	2130.25	6058.76	7092.96	2738.06	3213.83	5205.93	4861.91	12.1761	11.6418	12.508	11.1583	11.3684	10.781	11.3291	11.1774	12.1284	11.3109	P	P	P	P	P	P	P	P	P	P	noncoding	ENST00000531465	HMGB1P24	GENCODE	328	chr17	-	35501059	35501387	ACAACTAAACATGGGCAAAGGAGATCCTAAGAAGCCTAGAGGCAAGATGTTGTCATACGC	intron sense-overlapping
ASHGA5P049633	0.0250394	2.28232	4861.91	2130.25	11.902	11.2139	3159.21	2827.43	1399.91	1279.87	1984.84	2130.25	6058.76	7092.96	2738.06	3213.83	5205.93	4861.91	12.1761	11.6418	12.508	11.1583	11.3684	10.781	11.3291	11.1774	12.1284	11.3109	P	P	P	P	P	P	P	P	P	P	noncoding	ENST00000531465	HMGB1P24	GENCODE	328	chr17	-	35501059	35501387	ACAACTAAACATGGGCAAAGGAGATCCTAAGAAGCCTAGAGGCAAGATGTTGTCATACGC	intron sense-overlapping
ASHGA5P049633	0.0250394	2.28232	4861.91	2130.25	11.902	11.2139	3159.21	2827.43	1399.91	1279.87	1984.84	2130.25	6058.76	7092.96	2738.06	3213.83	5205.93	4861.91	12.1761	11.6418	12.508	11.1583	11.3684	10.781	11.3291	11.1774	12.1284	11.3109	P	P	P	P	P	P	P	P	P	P	noncoding	ENST00000531465	HMGB1P24	GENCODE	328	chr17	-	35501059	35501387	ACAACTAAACATGGGCAAAGGAGATCCTAAGAAGCCTAGAGGCAAGATGTTGTCATACGC	intron sense-overlapping
ASHGA5P039363	0.00515467	2.27977	214.457	94.0697	7.51016	6.47523	166.733	118.705	43.095	36.6366	105.179	94.0697	261.444	206.486	149.071	169.614	285.668	214.457	7.69843	7.24572	7.39974	6.59053	7.28729	5.84849	7.19712	5.78604	7.96824	6.90535	P	P	P	P	P	P	P	P	P	P	noncoding	NR_037877	LOC100505912	RefSeq	898	chr4	-	22328989	22341289	AATGGAGAAATGCTAACTTACAGAAAGGTCAGGTTGGTGTTTGAATGGTTTTAATTTCCT	intergenic
ASHGA5P022181	0.0126278	2.27535	87.72	38.5524	6.1617	5.32366	41.429	47.6768	26.2365	32.28	45.1395	38.5524	73.7946	65.3064	40.5208	96.6781	162.3	87.72	5.88007	5.01448	5.84498	5.3199	5.47896	5.07929	6.43678	5.55799	7.1677	5.64665	P	P	P	P	P	P	P	P	P	P	noncoding	ENST00000551496	RP11-386G11.10	GENCODE	319	chr12	+	49525492	49541648	CAGTTTGTCAAACATGGACAAGATGGCTGGGGTCCTGTGGAGTTCTAGTAATCTTCTTAC	bidirectional
ASHGA5P040045	0.0265401	2.26015	128.758	56.9689	6.74885	5.81052	58.2943	74.3999	89.0533	30.434	32.663	56.9689	144.489	214.326	115.138	72.1034	97.7358	128.758	6.85591	5.57583	7.45404	5.94366	6.9407	6.89579	6.03062	5.45919	6.46296	5.17814	P	P	P	P	P	P	P	P	P	P	noncoding	NR_002799	LOC256880	RefSeq	1985	chr4	+	100871635	100873620	AGATAATACTCTGCCAGCTCTTTGCTATGAAGCCCCATAAAGGGAATTTACTGTTGCCTC	bidirectional
ASHGA5P022077	0.0236863	2.25584	1727.8	765.924	10.4734	9.75472	764.649	1083.6	901.687	474.584	605.098	765.924	1519.58	2097.26	1252.69	1577.45	2192.03	1727.8	10.1934	9.54576	10.6869	9.756	10.2769	10.1885	10.3239	9.7144	10.8861	9.569	P	P	P	P	P	P	P	P	P	P	noncoding	NR_037592	AK2	RefSeq	2877	chr1	-	33476825	33502512	ACTGCCCCAGGCACCCAGATTGGCTGAAAACTTCTGTGTCTGCCATTTAGCTACTGGGGA	exon sense-overlapping
ASHGA5P022077	0.0236863	2.25584	1727.8	765.924	10.4734	9.75472	764.649	1083.6	901.687	474.584	605.098	765.924	1519.58	2097.26	1252.69	1577.45	2192.03	1727.8	10.1934	9.54576	10.6869	9.756	10.2769	10.1885	10.3239	9.7144	10.8861	9.569	P	P	P	P	P	P	P	P	P	P	noncoding	NR_037592	AK2	RefSeq	2877	chr1	-	33476825	33502512	ACTGCCCCAGGCACCCAGATTGGCTGAAAACTTCTGTGTCTGCCATTTAGCTACTGGGGA	exon sense-overlapping
ASHGA5P022077	0.0236863	2.25584	1727.8	765.924	10.4734	9.75472	764.649	1083.6	901.687	474.584	605.098	765.924	1519.58	2097.26	1252.69	1577.45	2192.03	1727.8	10.1934	9.54576	10.6869	9.756	10.2769	10.1885	10.3239	9.7144	10.8861	9.569	P	P	P	P	P	P	P	P	P	P	noncoding	NR_037592	AK2	RefSeq	2877	chr1	-	33476825	33502512	ACTGCCCCAGGCACCCAGATTGGCTGAAAACTTCTGTGTCTGCCATTTAGCTACTGGGGA	exon sense-overlapping
ASHGA5P049676	0.00300134	2.25084	85.2262	37.8641	6.23198	5.21057	36.0913	63.6459	38.0934	21.5403	29.9497	37.8641	55.0561	113.319	78.2705	89.7886	89.6969	85.2262	5.49214	4.78303	6.57802	5.71856	6.41373	5.66873	6.33278	4.83084	6.34323	5.05171	P	P	M	P	P	P	P	P	P	P	noncoding	NR_033465	NT5C3L	RefSeq	1654	chr17	-	39981333	39992523	TCAGTGGTTCTCTCGGGTCTCGGGACAGGTGAGCACCCTGATGAAGGCCACGGTCCTGAT	exon sense-overlapping
ASHGA5P032323	0.00343894	2.24983	235.837	104.825	7.64134	6.83537	126.099	123.06	96.9908	62.6184	115.355	104.825	277.727	248.821	182.413	159.179	311.046	235.837	7.78342	6.79634	7.65594	6.63684	7.56884	7.01958	7.10817	6.67449	8.09031	7.0496	P	P	P	M	P	M	P	P	M	M	noncoding	ENST00000429210	RP11-312O7.2	GENCODE	758	chr1	-	206135292	206137828	GAGGAGAGCTCTGAGTGGGAAGCGGAGCCGGGGGCCTGGGACCCGTCGCGTCAGAGCCAG	intronic antisense
ASHGA5P045350	0.0369702	2.24575	1651.75	735.498	10.2743	9.64527	779.261	1342.17	508.318	510.85	536.896	735.498	1876.58	3121.1	699.521	1378.45	1183.08	1651.75	10.5047	9.57617	11.2911	10.0707	9.46605	9.3689	10.1245	9.83012	9.98537	9.3804	P	P	M	M	P	P	P	M	P	P	noncoding	uc004axc.1	DQ786258	UCSC_knowngene	652	chr9	-	99957632	99960147	TGTCTTACGTATGGCAAAAGCATTCATTGGAGAGCCTTACTTGGGTTTGCACCCAAAAAA	intergenic
ASHGA5P017455	0.0421212	2.24316	253.225	112.887	7.70395	6.8868	143.457	183.216	71.0064	91.42	75.337	112.887	251.364	319.023	126.384	217.561	351.791	253.225	7.64499	7.00557	8.00175	7.20351	7.06205	6.57322	7.5381	7.25245	8.27289	6.39925	P	P	P	P	P	P	P	P	P	P	noncoding	NR_004862	TYW5	RefSeq	5365	chr2	-	200793633	200820459	GACTTCATTAAACTTTACCTTTTGACCAGTTGGTCCAGAGGGCAGCTGAAGAGAAACATA	exon sense-overlapping
ASHGA5P017455	0.0421212	2.24316	253.225	112.887	7.70395	6.8868	143.457	183.216	71.0064	91.42	75.337	112.887	251.364	319.023	126.384	217.561	351.791	253.225	7.64499	7.00557	8.00175	7.20351	7.06205	6.57322	7.5381	7.25245	8.27289	6.39925	P	P	P	P	P	P	P	P	P	P	noncoding	NR_004862	TYW5	RefSeq	5365	chr2	-	200793633	200820459	GACTTCATTAAACTTTACCTTTTGACCAGTTGGTCCAGAGGGCAGCTGAAGAGAAACATA	natural antisense
ASHGA5P021779	0.0139861	2.24103	365.04	162.889	8.26273	7.47599	214.391	197.695	149.722	90.5852	162.055	162.889	325.582	273.45	291.587	437.443	497.136	365.04	8.00065	7.62244	7.78474	7.31138	8.23859	7.63316	8.52394	7.23739	8.76575	7.57557	P	P	P	P	P	P	P	P	P	P	noncoding	NR_037793	LRR1	RefSeq	1853	chr14	+	50065414	50081390	AGTTATGAAGCTAAGGGAGAACATTGAGCAATTCTTCACCAAATTTGTAGATGAGGGGAA	exon sense-overlapping
ASHGA5P021779	0.0139861	2.24103	365.04	162.889	8.26273	7.47599	214.391	197.695	149.722	90.5852	162.055	162.889	325.582	273.45	291.587	437.443	497.136	365.04	8.00065	7.62244	7.78474	7.31138	8.23859	7.63316	8.52394	7.23739	8.76575	7.57557	P	P	P	P	P	P	P	P	P	P	noncoding	NR_037793	LRR1	RefSeq	1853	chr14	+	50065414	50081390	AGTTATGAAGCTAAGGGAGAACATTGAGCAATTCTTCACCAAATTTGTAGATGAGGGGAA	exon sense-overlapping
ASHGA5P010821	0.0111319	2.24096	2190.23	977.363	10.8135	10.1174	978.657	1524.03	939.265	602.07	842.798	977.363	1963	2798.52	2032.19	1486.99	2670.46	2190.23	10.5716	9.9356	11.1169	10.2649	10.9667	10.2425	10.2374	10.0776	11.1749	10.0664	P	P	P	P	P	P	P	P	P	P	noncoding	NR_037606	MRPS14	RefSeq	2252	chr1	-	174982093	174992591	GTAGTGCTCGATGGTTCCTTCATCAGCTTCAGGCCAAGTTCGAAGTCACTATGTAGACTG	exon sense-overlapping
ASHGA5P029917	0.0412062	2.23721	1039.95	464.842	9.72406	8.9169	339.475	956.371	399.3	270.004	359.059	464.842	1029.7	1084.01	1535.93	925.425	624.697	1039.95	9.64443	8.32334	9.75216	9.568	10.571	9.02371	9.56621	8.87528	9.08648	8.79418	P	P	P	P	P	P	P	P	P	P	noncoding	ENST00000452962	RP11-307C12.11	GENCODE	822	chr1	-	155017666	155018594	CCAAAGCCCTACATAATGCTTCAGTTTGCTAAGGAAAAAATGTTAATTACTGCAAATGTG	natural antisense
ASHGA5P029917	0.0412062	2.23721	1039.95	464.842	9.72406	8.9169	339.475	956.371	399.3	270.004	359.059	464.842	1029.7	1084.01	1535.93	925.425	624.697	1039.95	9.64443	8.32334	9.75216	9.568	10.571	9.02371	9.56621	8.87528	9.08648	8.79418	P	P	P	P	P	P	P	P	P	P	noncoding	ENST00000452962	RP11-307C12.11	GENCODE	822	chr1	-	155017666	155018594	CCAAAGCCCTACATAATGCTTCAGTTTGCTAAGGAAAAAATGTTAATTACTGCAAATGTG	natural antisense
ASHGA5P050940	0.0101288	2.22241	132.847	59.7758	6.8637	5.87408	71.0523	97.1263	51.3113	26.3803	53.0089	59.7758	143.172	118.338	173.668	119.327	109.729	132.847	6.83804	5.89577	6.63539	6.29798	7.49335	6.11185	6.73118	5.1989	6.62055	5.8659	P	P	P	P	P	P	P	P	P	P	noncoding	ENST00000421829	RP4-694B14.5	GENCODE	481	chr20	+	25612845	25655538	GCATTCTCTATCATTGAGGCATTTTCTCAGGAAATCACCTGTGAAATATTTTGCAGCTAA	natural antisense
ASHGA5P043479	0.0385331	2.21028	786.203	355.702	9.31775	8.59162	582.18	350.824	258.215	395.465	191.827	355.702	1277.87	552.849	631.703	788.387	680.205	786.203	9.95073	9.14098	8.78235	8.12243	9.31518	8.40273	9.34591	9.45542	9.19456	7.83655	P	P	P	P	P	P	M	P	P	P	noncoding	TCONS_00018263	XLOC_008543	LincRNAs identified by Cabili et al	301	chr10	+	89190751	89209410	ATTTGATAGTACATTTTGATAGTACAGGAGGCGATACGGCATGGTGACAGAAAAGCGCCG	intergenic
ASHGA5P036776	0.0077747	2.20703	6018.79	2727.11	12.2737	11.5973	3833.88	3580.31	2348.32	1782.61	2090.41	2727.11	7748.22	5402.37	5307.6	4856.98	6778.77	6018.79	12.5047	11.9088	12.1135	11.5173	12.3072	11.5212	11.9408	11.6556	12.5024	11.3834	M	P	M	P	P	P	P	P	P	P	noncoding	ENST00000417578	RP4-564F22.2	GENCODE	880	chr20	-	37049239	37063920	CCATGCCTGGAATGACTTTAATAACCAAGAGTTTTATTTTTGAATTTGTAGCTGTCGTTC	intergenic
ASHGA5P018676	0.0415904	2.20095	72.2752	32.8382	5.9483	5.07381	38.1836	45.9677	26.842	26.7436	26.4538	32.8382	72.2995	74.6024	53.251	40.2358	120.987	72.2753	5.85088	4.88059	6.01686	5.27062	5.86511	5.11476	5.25233	5.21971	6.75631	4.88337	P	P	P	P	P	P	P	P	P	P	noncoding	ENST00000456374	STAG3L1	pseudogene	894	chr7	+	74990643	74996355	ACCAGAGCACGGGTGATGTGCAGGAGAGCACACTGATAGAAATCCTTGTGTCCAGTGCCC
ASHGA5P016093	0.0167533	2.19402	353.35	161.052	8.22244	7.51131	166.726	196.882	157.229	124.738	159.684	161.052	438.047	355.333	214.438	372.125	386.808	353.35	8.43224	7.24547	8.15383	7.30514	7.81859	7.70376	8.29993	7.74867	8.4076	7.5535	P	P	M	P	P	P	P	M	P	P	noncoding	uc021vdo.1	LOC100506054	UCSC_knowngene	1047	chr2	+	3605975	3609340	AACTGAGTTGAGAAGGGTCCATTCAAGAATTGTGCCCACAATATACCAGGCACTTGTCCA	natural antisense
ASHGA5P015077	0.0075034	2.19274	1965.57	896.399	10.6754	9.9989	1015.44	1246.27	602.791	664.495	953	896.399	2473.22	2188.76	1498.93	1923.22	1743.73	1965.57	10.9209	9.99208	10.763	9.96211	10.5359	9.59109	10.6125	10.1991	10.5444	10.2502	P	P	P	P	P	P	P	P	P	P	noncoding	ENST00000416366	LINC00174	GENCODE	520	chr7	-	65855117	65858716	CCGCCCGGCCAGCCGCCCCATCCGGGAGCTGGATCTACCATGAAAGACTTCAGAGTCCAG	intergenic
ASHGA5P020399	0.0102459	2.19195	1541.81	703.395	10.2976	9.6317	725.81	1021.5	743.038	437.796	588.828	703.395	1428.88	1429.41	2270.63	1446.28	1133.82	1541.81	10.1004	9.46836	10.1376	9.66358	11.1211	9.89645	10.1995	9.60349	9.92939	9.52661	P	P	P	P	P	P	P	P	P	P	noncoding	uc011kfq.2	PMS2L2	UCSC_knowngene	1321	chr7	-	74702862	74988229	GAAGGCTTAACTCTGAAACATCACACATCTAAGATTCGAGAGTTTGCCGACCTAACTCGG	intron sense-overlapping
ASHGA5P040085	0.0195595	2.18194	63.6669	29.179	5.72335	4.89775	45.4202	27.8493	22.7874	26.974	22.8644	29.179	134.527	42.3238	46.5837	46.3358	48.5645	63.6669	6.74094	5.16715	5.27729	4.56407	5.67547	4.84828	5.4413	5.23625	5.48174	4.67302	P	P	M	P	P	P	P	P	P	P	noncoding	ENST00000502760	RP11-33B1.1	GENCODE	850	chr4	+	120415640	120421434	AACAAGTAGAATGCTGAGAAAAATAGGGAGACGACAGTGGCACATGACACCTAGTTTTTT	natural antisense
ASHGA5P040085	0.0195595	2.18194	63.6669	29.179	5.72335	4.89775	45.4202	27.8493	22.7874	26.974	22.8644	29.179	134.527	42.3238	46.5837	46.3358	48.5645	63.6669	6.74094	5.16715	5.27729	4.56407	5.67547	4.84828	5.4413	5.23625	5.48174	4.67302	P	P	M	P	P	P	P	P	P	P	noncoding	ENST00000502760	RP11-33B1.1	GENCODE	850	chr4	+	120415640	120421434	AACAAGTAGAATGCTGAGAAAAATAGGGAGACGACAGTGGCACATGACACCTAGTTTTTT	natural antisense
ASHGA5P040085	0.0195595	2.18194	63.6669	29.179	5.72335	4.89775	45.4202	27.8493	22.7874	26.974	22.8644	29.179	134.527	42.3238	46.5837	46.3358	48.5645	63.6669	6.74094	5.16715	5.27729	4.56407	5.67547	4.84828	5.4413	5.23625	5.48174	4.67302	P	P	M	P	P	P	P	P	P	P	noncoding	ENST00000502760	RP11-33B1.1	GENCODE	850	chr4	+	120415640	120421434	AACAAGTAGAATGCTGAGAAAAATAGGGAGACGACAGTGGCACATGACACCTAGTTTTTT	natural antisense
ASHGA5P039313	0.0430682	2.17976	80.3114	36.8441	6.07268	5.24496	48.3528	46.0393	28.847	26.0189	34.9623	36.8441	46.2194	104.144	64.1636	53.7968	133.233	80.3114	5.24474	5.27285	6.46296	5.27402	6.13194	5.23003	5.64086	5.17116	6.88288	5.27673	P	P	P	P	P	P	P	P	M	P	noncoding	ENST00000506770	FAM86EP	GENCODE	751	chr4	-	3949250	3954892	TCAAAGGACAGGGGTGCCTCTTAAGGTGACCTTCAAGCCACAGCCCTCTTGCTGGAGACA	intergenic
ASHGA5P043148	0.0110205	2.17865	1344.11	616.944	10.1015	9.43741	662.708	858.22	662.468	373.084	528.241	616.944	1188.49	1234.97	1960.83	1374.35	961.898	1344.11	9.84511	9.33567	9.91688	9.41887	10.916	9.71976	10.1207	9.35844	9.70878	9.35434	P	P	P	P	P	P	P	P	P	P	noncoding	uc003uco.1	PMS2L2	UCSC_knowngene	1127	chr7	-	74942616	74981240	TCTAAGATTCGAGAGTTTGCCGACCTAACTCGGGTTGAAACTTTTGGCTTTCAGGGGAAA	intergenic
ASHGA5P021144	0.0314662	2.17849	1434.01	658.26	10.1822	9.46182	964.701	1035.4	358.796	537.143	395.258	658.26	1463.8	1991.34	819.463	1390.18	1505.28	1434.01	10.1359	9.90372	10.6128	9.68312	9.69785	8.87613	10.1363	9.90851	10.3285	8.93761	P	P	P	P	P	P	P	P	P	P	noncoding	uc001lxw.4	LOC650368	UCSC_knowngene	1243	chr11	+	3402190	3419302	ACGTAAACAGGTGGTGAAGCTCCTTATGGTCCTGACCCTACAGTTCCTGTCCCATGACCA	intergenic
ASHGA5P015094	0.0247231	2.1726	122.497	56.3827	6.66496	5.89653	49.669	84.9166	54.2046	42.9159	50.2073	56.3827	95.1116	143.591	69.4449	206.82	97.5175	122.497	6.239	5.31678	6.90849	6.12485	6.24618	6.19054	7.46973	6.05523	6.46139	5.79526	P	P	M	P	P	P	P	P	P	P	noncoding	NR_047522	LOC643837	RefSeq	6574	chr1	+	762970	794826	CAGTTACACAACCTCCAGGTATGATCCTGTTTAAGGACTGGATTTAGGATAACTACTTAG	intergenic
ASHGA5P018902	0.0230722	2.17113	1358	625.481	9.94931	9.33298	905.886	640.791	406.601	218.088	956.04	625.481	1536.99	953.541	1086.79	484.956	2727.73	1358	10.2085	9.81002	9.57724	8.98398	10.0747	9.04621	8.67608	8.5689	11.21	10.2558	P	P	P	P	P	P	P	P	M	P	noncoding	NR_027168	C17orf76-AS1	RefSeq	1041	chr17	+	16342300	16345340	AGAGAACTGGTCGCTGAAACCTCTACAACTTAGTTGACCGTAACTGCCAGAGCCCTGCCC	natural antisense
ASHGA5P018902	0.0230722	2.17113	1358	625.481	9.94931	9.33298	905.886	640.791	406.601	218.088	956.04	625.481	1536.99	953.541	1086.79	484.956	2727.73	1358	10.2085	9.81002	9.57724	8.98398	10.0747	9.04621	8.67608	8.5689	11.21	10.2558	P	P	P	P	P	P	P	P	M	P	noncoding	NR_027168	C17orf76-AS1	RefSeq	1041	chr17	+	16342300	16345340	AGAGAACTGGTCGCTGAAACCTCTACAACTTAGTTGACCGTAACTGCCAGAGCCCTGCCC	natural antisense
ASHGA5P015657	0.048696	2.17002	532.305	245.299	8.75783	8.06194	239.389	394.12	249.778	166.221	176.989	245.299	245.252	596.509	577.216	639.197	603.353	532.305	7.61087	7.79377	8.89428	8.2794	9.18811	8.35895	9.06014	8.16911	9.03574	7.70846	P	P	P	P	P	P	P	P	P	P	noncoding	NR_073004	DUS4L	RefSeq	2119	chr7	+	107204401	107218968	TTAAAATAAGGCTGAAGCAACAGGAGTTTCATGGATTACAGTCCATGGAAGAACTGCTGA	exon sense-overlapping
ASHGA5P015657	0.048696	2.17002	532.305	245.299	8.75783	8.06194	239.389	394.12	249.778	166.221	176.989	245.299	245.252	596.509	577.216	639.197	603.353	532.305	7.61087	7.79377	8.89428	8.2794	9.18811	8.35895	9.06014	8.16911	9.03574	7.70846	P	P	P	P	P	P	P	P	P	P	noncoding	NR_073004	DUS4L	RefSeq	2119	chr7	+	107204401	107218968	TTAAAATAAGGCTGAAGCAACAGGAGTTTCATGGATTACAGTCCATGGAAGAACTGCTGA	exon sense-overlapping
ASHGA5P015657	0.048696	2.17002	532.305	245.299	8.75783	8.06194	239.389	394.12	249.778	166.221	176.989	245.299	245.252	596.509	577.216	639.197	603.353	532.305	7.61087	7.79377	8.89428	8.2794	9.18811	8.35895	9.06014	8.16911	9.03574	7.70846	P	P	P	P	P	P	P	P	P	P	noncoding	NR_073004	DUS4L	RefSeq	2119	chr7	+	107204401	107218968	TTAAAATAAGGCTGAAGCAACAGGAGTTTCATGGATTACAGTCCATGGAAGAACTGCTGA	natural antisense
ASHGA5P015657	0.048696	2.17002	532.305	245.299	8.75783	8.06194	239.389	394.12	249.778	166.221	176.989	245.299	245.252	596.509	577.216	639.197	603.353	532.305	7.61087	7.79377	8.89428	8.2794	9.18811	8.35895	9.06014	8.16911	9.03574	7.70846	P	P	P	P	P	P	P	P	P	P	noncoding	NR_073004	DUS4L	RefSeq	2119	chr7	+	107204401	107218968	TTAAAATAAGGCTGAAGCAACAGGAGTTTCATGGATTACAGTCCATGGAAGAACTGCTGA	natural antisense
ASHGA5P015657	0.048696	2.17002	532.305	245.299	8.75783	8.06194	239.389	394.12	249.778	166.221	176.989	245.299	245.252	596.509	577.216	639.197	603.353	532.305	7.61087	7.79377	8.89428	8.2794	9.18811	8.35895	9.06014	8.16911	9.03574	7.70846	P	P	P	P	P	P	P	P	P	P	noncoding	NR_073004	DUS4L	RefSeq	2119	chr7	+	107204401	107218968	TTAAAATAAGGCTGAAGCAACAGGAGTTTCATGGATTACAGTCCATGGAAGAACTGCTGA	natural antisense
ASHGA5P016501	0.00753352	2.16639	1783.5	823.262	10.5049	9.87048	781.934	1204.88	931.341	552.813	645.339	823.262	1655.78	1721.37	2623.21	1557.49	1359.66	1783.5	10.3236	9.58074	10.399	9.91728	11.3087	10.233	10.3065	9.95529	10.1865	9.66609	P	P	P	P	P	P	P	M	P	P	noncoding	uc010lgv.1	PMS2P1	UCSC_knowngene	1245	chr7	-	99918262	99933930	TTGGCTTTCGGGGGGAAGCTCTGAGCTCACTTTGTGCACTGAGGACTCCTAGAAGTACCC	natural antisense
ASHGA5P030215	0.0406987	2.164	2117.54	978.53	10.477	9.92288	2335.27	666.788	597.6	521.096	771.897	978.53	5380.7	1081.25	1231.18	1001.09	1893.48	2117.54	12.0363	11.2092	9.74937	9.0401	10.2528	9.57586	9.68046	9.86312	10.6661	9.92609	P	P	M	P	P	P	P	P	P	P	noncoding	ENST00000515341	GOLGA6L5	pseudogene	1828	chr15	-	85053156	85060016	AGGCTGCATGCCATTCTTTTCGGGCTGCGGAGAACAGGGAGCTAAACATCACCATCATCT
ASHGA5P031100	0.0145864	2.16034	166.729	77.1771	7.1774	6.3126	82.4762	113.714	41.5592	51.0828	97.0531	77.1771	141.729	209.098	154.064	183.317	145.435	166.729	6.82158	6.12286	7.42281	6.52527	7.32531	5.79627	7.30373	6.33735	7.01357	6.78127	P	P	P	P	P	P	P	P	P	P	noncoding	ENST00000569291	RP11-452L6.1	GENCODE	449	chr16	-	31460855	31464814	ACAGTCACAGTTATGTCTCTGAGCTCACCCAGTCCTGGGTTCCAGGTTCCCAGCTCTGAG	intergenic
ASHGA5P058321	0.00802192	2.15773	4741.16	2197.29	11.893	11.3206	2479.98	2853.38	1843.17	1853.97	1955.95	2197.29	4707.77	4601.38	3425.23	7706.76	3264.68	4741.16	11.8509	11.2785	11.8742	11.1724	11.6648	11.1672	12.6001	11.7023	11.475	11.2824	P	P	P	P	P	P	P	P	P	P	noncoding	uc001abr.1	LOC643837	UCSC_knowngene	1543	chr1	+	763063	789740	CCTGATGAACATGACCGCCGTGTGGTAAACTGATGAACCCCGACCCTGATGAACGTGAGA	intergenic
ASHGA5P058407	0.00410338	2.15485	270.543	125.551	7.86178	7.09453	145.701	180.596	97.0594	82.5588	121.838	125.551	309.037	227.063	231.566	246.86	338.186	270.543	7.9291	7.02864	7.53079	7.18243	7.91552	7.02112	7.71186	7.10527	8.22165	7.1352	P	P	P	P	P	P	P	P	P	P	noncoding	uc002tkd.3	WASH2P	UCSC_knowngene	1659	chr2	+	114346126	114356613	TTGTCCATCAGTCCCTGAGAACTACTTCTATGTGCCAGACCTGGGCCAGGTGCCTGAGAT	intergenic
ASHGA5P053030	0.00583597	2.15053	1118.39	520.052	9.81299	9.2139	550.819	435.874	703.124	523.177	387.267	520.052	772.251	756.996	1352.81	1750.37	959.515	1118.39	9.25297	9.0566	9.23721	8.4192	10.3923	9.81602	10.4783	9.86981	9.70415	8.90786	P	P	P	P	P	P	P	P	P	P	noncoding	ENST00000578994	AC005154.6	GENCODE	644	chr7	-	30617519	30634425	CACTCCATTTATTCCACCTGACTTCCCACTTGGCTGCATCCTCAACCATTGAAATGAATT	natural antisense
ASHGA5P025946	0.0158945	2.14764	249.728	116.28	7.71797	6.98062	143.046	152.47	106.889	71.5481	107.447	116.28	238.862	266.927	171.679	367.351	203.818	249.728	7.57726	7.00068	7.75136	6.93308	7.47964	7.1518	8.28396	6.88135	7.49761	6.93619	P	P	P	P	P	P	P	P	P	P	noncoding	uc009vjn.1	LOC643837	UCSC_knowngene	510	chr1	+	763063	788902	AGTTACACAACCTCCAGACATCTAGGCTTGCTGTCAAGGCTTCTGATCAACATGAGATGA	intergenic
ASHGA5P058318	0.00660113	2.14228	325.806	152.084	8.11524	7.40224	182.046	202.366	123.428	112.229	140.349	152.084	408.528	272.346	256.423	295.729	396.005	325.806	8.32505	7.37945	7.77885	7.34487	8.06229	7.35963	7.9677	7.57639	8.44231	7.35088	P	P	P	P	P	P	P	P	P	P	noncoding	uc001aac.4	WASH7P	UCSC_knowngene	1746	chr1	-	14361	29370	TTGTCCATCAGTCCCAGAGAACTACTTCTATGTGCCAGACCTGGGCCAGGTGCCTGAGAT	intergenic
ASHGA5P045265	0.0071135	2.14108	166.753	77.8827	7.06032	6.24997	146.446	87.3566	60.8972	32.8009	61.9129	77.8827	343.767	121.29	112.544	137.718	118.444	166.753	8.08309	7.03939	6.66823	6.16137	6.90926	6.35868	6.91407	5.59108	6.72695	6.09936	P	P	P	P	P	P	P	P	P	P	noncoding	uc004afw.3	CBWD5	UCSC_knowngene	2975	chr9	-	70181136	70195743	CCAGCATTATTTTCATATTAGGAAGCAGGAGAAAGTTAAGGAACTCTAAGCAATACTAGA	intergenic
ASHGA5P021882	0.0131477	2.13209	929.616	436.012	9.59937	8.93918	548.919	600.294	348.505	313.859	368.486	436.012	1007.52	837.084	739.908	820.905	1242.66	929.616	9.61206	9.04949	9.37702	8.88807	9.54669	8.82249	9.40364	9.09844	10.0574	8.83742	P	P	P	P	P	P	P	P	P	P	noncoding	uc010sdc.1	LOC100288778	UCSC_knowngene	792	chr12	+	87871	89827	TTCCACACTGAGGTAGCCGAGCCTCTCAAGACCTACAAGATGGGGTACTAACACCACCCC	intergenic
ASHGA5P020049	0.00926412	2.13182	259.904	121.916	7.70754	7.01717	109.107	212.62	87.7202	96.1124	104.02	121.916	181.658	409.333	127.277	302.902	278.347	259.904	7.18327	6.57135	8.34742	7.41484	7.07239	6.87333	8.00325	7.33682	7.93139	6.88951	P	P	P	P	P	P	P	P	P	P	noncoding	ENST00000507301	FAM86EP	GENCODE	624	chr4	-	3944578	3957090	TTTGCAGAAGGCCAGGCCAGGATCAGATGGGAAGTGGAAGCTTGTCATGACCAGAAACTG	intergenic
ASHGA5P025916	0.0263071	2.12184	266.104	125.412	7.75601	7.10209	131.618	173.724	96.8392	85.7475	139.13	125.412	221.253	411.193	135.02	221.575	341.479	266.104	7.46878	6.87362	8.35447	7.12387	7.15509	7.01748	7.56726	7.15945	8.23445	7.33605	P	P	P	P	P	P	P	P	P	P	noncoding	NR_046298	SLC25A1	RefSeq	1522	chr22	-	19163087	19166338	CGGCCGTCAGGTGAAGTTCATCCACGACCAGACCTCCCCAAACCCCAAGTACAGAGGATT	exon sense-overlapping
ASHGA5P025916	0.0263071	2.12184	266.104	125.412	7.75601	7.10209	131.618	173.724	96.8392	85.7475	139.13	125.412	221.253	411.193	135.02	221.575	341.479	266.104	7.46878	6.87362	8.35447	7.12387	7.15509	7.01748	7.56726	7.15945	8.23445	7.33605	P	P	P	P	P	P	P	P	P	P	noncoding	NR_046298	SLC25A1	RefSeq	1522	chr22	-	19163087	19166338	CGGCCGTCAGGTGAAGTTCATCCACGACCAGACCTCCCCAAACCCCAAGTACAGAGGATT	exon sense-overlapping
ASHGA5P058514	0.0204099	2.12004	574.734	271.096	8.93627	8.23097	220.062	400.172	289.355	256.874	189.018	271.096	651.511	611.705	523.811	625.234	461.407	574.734	9.00403	7.66059	8.92841	8.30513	9.06158	8.56443	9.02446	8.80915	8.66285	7.81557	P	P	M	P	P	P	P	P	P	P	noncoding	uc009vis.3	WASH7P	UCSC_knowngene	843	chr1	-	14361	16765	TCTCCTTCAGGGAGCTCCCAGGGAAGTGGTTGACCCCTCCGGTGGCTGGCCACTCTGCTA	intergenic
ASHGA5P014687	0.0438708	2.11108	78.497	37.1834	6.08699	5.2349	53.1249	45.1573	33.9328	21.9933	31.7087	37.1834	68.7966	80.6509	48.9547	123.516	70.5674	78.497	5.78254	5.42715	6.11618	5.24672	5.7475	5.49454	6.77808	4.87078	6.01066	5.13531	P	P	P	P	P	P	P	P	P	P	noncoding	NR_046478	FKBP14	RefSeq	5178	chr7	-	30050198	30066417	CACATCTCTGTCTAGATCTGAAATGGTAAAATTCCCCCAGAAAGTACACTGATATTTAAT	exon sense-overlapping
ASHGA5P044208	0.0372289	2.09963	329.412	156.891	8.13133	7.39108	162.279	178.881	235.365	86.9803	120.948	156.891	258.235	396.175	301.665	277.771	413.213	329.412	7.68004	7.2077	8.30323	7.16528	8.29124	8.27441	7.87699	7.18051	8.50513	7.1275	P	P	P	P	P	P	P	P	P	P	noncoding	TCONS_00018537	XLOC_008855	LincRNAs identified by Cabili et al	1031	chr10	-	75540422	75541627	TGCTTATTTTTCTTCCCTTAAGTCTCAGTTCATGTCACAGAGGGCTTCCCTGACCTCTCA	intergenic
ASHGA5P015912	0.0233719	2.09803	153.657	73.2384	7.07234	6.25067	74.3127	113.385	79.1328	44.7716	54.5894	73.2384	177.252	122.915	131.121	167.658	169.338	153.657	7.14892	5.96211	6.68888	6.5233	7.111	6.72757	7.17761	6.12851	7.23531	5.91185	P	P	P	P	P	P	M	P	P	M	noncoding	ENST00000424705	RP3-461P17.10	GENCODE	514	chr20	+	44076041	44076982	TGAGGCAAAGAGAGAGCCTGTCACCTGTGCTGCCTTGAGATGCTGACATCTGAGGATGCC	intergenic
ASHGA5P051368	0.014293	2.09713	409.315	195.178	8.39675	7.77609	177.754	279.668	169.36	171.388	177.723	195.178	370.354	591.94	273.8	518.075	292.406	409.315	8.17785	7.3487	8.88198	7.79637	8.15237	7.80163	8.76827	8.21894	8.00325	7.71479	P	P	P	P	P	P	P	P	P	P	noncoding	NR_021492	LOC100144603	RefSeq	628	chr22	+	51021454	51022355	GGTGATCACAAGGCTAATGTCACTTTTGCTGCAGTGGAAAATCATGATCATTCTGTTTAA	bidirectional
ASHGA5P049517	0.027098	2.08025	1262.09	606.702	9.86753	9.27816	887.185	664.564	384.535	202.937	894.289	606.702	1414.53	842.186	1088.9	508.693	2456.16	1262.09	10.0866	9.77383	9.38215	9.03363	10.0772	8.9684	8.73999	8.46312	11.0518	10.1518	P	P	P	P	P	P	P	P	P	P	noncoding	NR_027163	C17orf76-AS1	RefSeq	1125	chr17	+	16342300	16345340	ACGTCTAATGTCTATCTGACCGCAGTCGCTGAAACCTCTACAACTTAGTTGACCGTAACT	natural antisense
ASHGA5P049517	0.027098	2.08025	1262.09	606.702	9.86753	9.27816	887.185	664.564	384.535	202.937	894.289	606.702	1414.53	842.186	1088.9	508.693	2456.16	1262.09	10.0866	9.77383	9.38215	9.03363	10.0772	8.9684	8.73999	8.46312	11.0518	10.1518	P	P	P	P	P	P	P	P	P	P	noncoding	NR_027163	C17orf76-AS1	RefSeq	1125	chr17	+	16342300	16345340	ACGTCTAATGTCTATCTGACCGCAGTCGCTGAAACCTCTACAACTTAGTTGACCGTAACT	natural antisense
ASHGA5P014866	0.0365251	2.07648	575.355	277.081	8.88426	8.2167	258.022	453.397	317.59	178.93	177.467	277.081	420.025	764.169	384.476	786.054	522.05	575.355	8.35922	7.9103	9.24944	8.48799	8.63548	8.68721	9.34016	8.28541	8.83703	7.71263	P	P	P	P	P	P	P	P	P	P	noncoding	NR_037641	HEATR8-TTC4	RefSeq	6118	chr1	+	55107426	55208328	CTCAGAAGGTCTAGAGTATGCCCAGTCGGACTTCATCTCTGCTTTTCATGAGGACTCCAG	exon sense-overlapping
ASHGA5P014866	0.0365251	2.07648	575.355	277.081	8.88426	8.2167	258.022	453.397	317.59	178.93	177.467	277.081	420.025	764.169	384.476	786.054	522.05	575.355	8.35922	7.9103	9.24944	8.48799	8.63548	8.68721	9.34016	8.28541	8.83703	7.71263	P	P	P	P	P	P	P	P	P	P	noncoding	NR_037641	HEATR8-TTC4	RefSeq	6118	chr1	+	55107426	55208328	CTCAGAAGGTCTAGAGTATGCCCAGTCGGACTTCATCTCTGCTTTTCATGAGGACTCCAG	exon sense-overlapping
ASHGA5P023085	0.020491	2.07538	834.903	402.288	9.25586	8.64222	618.247	706.095	152.716	245.264	289.117	402.288	1485.52	852.254	228.59	769.417	838.732	834.903	10.1567	9.23143	9.40364	9.12218	7.89882	7.66288	9.31518	8.74226	9.50497	8.45233	P	P	P	P	P	P	P	P	P	P	noncoding	ENST00000569384	TUG1	GENCODE	443	chr22	+	31369397	31371465	TCTCTTGATACATCAAGGCTTTGTGGCCATGAAGCCCTTTGAGTGAAAACTGTGCAGAAG	intergenic
ASHGA5P025789	0.0449563	2.07529	84.8001	40.8618	6.2347	5.44025	39.1904	55.3013	35.4678	40.4272	33.9224	40.8618	93.8307	94.2969	72.3462	58.8382	104.689	84.8001	6.22008	4.92315	6.33489	5.52317	6.3074	5.56776	5.75467	5.95317	6.55649	5.234	P	P	P	P	P	P	P	P	P	P	noncoding	NR_037714	RAD51L3-RFFL	RefSeq	3904	chr17	-	33336130	33448541	AATAAGGATGGCAGAAGCTCTCCGGAGGATCCAGGTGGTGCATGCATTTGACATCTTCCA	exon sense-overlapping
ASHGA5P025789	0.0449563	2.07529	84.8001	40.8618	6.2347	5.44025	39.1904	55.3013	35.4678	40.4272	33.9224	40.8618	93.8307	94.2969	72.3462	58.8382	104.689	84.8001	6.22008	4.92315	6.33489	5.52317	6.3074	5.56776	5.75467	5.95317	6.55649	5.234	P	P	P	P	P	P	P	P	P	P	noncoding	NR_037714	RAD51L3-RFFL	RefSeq	3904	chr17	-	33336130	33448541	AATAAGGATGGCAGAAGCTCTCCGGAGGATCCAGGTGGTGCATGCATTTGACATCTTCCA	exon sense-overlapping
ASHGA5P025789	0.0449563	2.07529	84.8001	40.8618	6.2347	5.44025	39.1904	55.3013	35.4678	40.4272	33.9224	40.8618	93.8307	94.2969	72.3462	58.8382	104.689	84.8001	6.22008	4.92315	6.33489	5.52317	6.3074	5.56776	5.75467	5.95317	6.55649	5.234	P	P	P	P	P	P	P	P	P	P	noncoding	NR_037714	RAD51L3-RFFL	RefSeq	3904	chr17	-	33336130	33448541	AATAAGGATGGCAGAAGCTCTCCGGAGGATCCAGGTGGTGCATGCATTTGACATCTTCCA	exon sense-overlapping
ASHGA5P025789	0.0449563	2.07529	84.8001	40.8618	6.2347	5.44025	39.1904	55.3013	35.4678	40.4272	33.9224	40.8618	93.8307	94.2969	72.3462	58.8382	104.689	84.8001	6.22008	4.92315	6.33489	5.52317	6.3074	5.56776	5.75467	5.95317	6.55649	5.234	P	P	P	P	P	P	P	P	P	P	noncoding	NR_037714	RAD51L3-RFFL	RefSeq	3904	chr17	-	33336130	33448541	AATAAGGATGGCAGAAGCTCTCCGGAGGATCCAGGTGGTGCATGCATTTGACATCTTCCA	exon sense-overlapping
ASHGA5P020318	0.00930727	2.06796	248.437	120.136	7.66038	6.97084	99.3664	222.047	87.2908	97.4644	94.5119	120.136	171.7	383.398	134.509	279.035	273.544	248.437	7.10182	6.41669	8.25702	7.47269	7.14848	6.86614	7.88476	7.35732	7.90981	6.74136	P	P	P	P	P	P	P	M	P	P	noncoding	ENST00000511488	FAM86EP	GENCODE	1209	chr4	-	3944493	3957121	GCAGAGGCCGGCCAGGCCAGGATCAGATGGGAAGTGGAAGCTTGTCATGACCAGAAACTG	intergenic
ASHGA5P043757	0.0261852	2.06496	525.804	254.631	8.75749	8.17189	252.715	350.691	232.952	211.405	225.39	254.631	428	457.375	667.424	736.853	339.366	525.804	8.39146	7.87586	8.50591	8.12211	9.40364	8.25986	9.26169	8.51936	8.22477	8.08225	P	P	M	P	P	P	P	P	P	P	noncoding	ENST00000441237	PMS2P9	pseudogene	515	chr7	+	76669260	76673093	GTACTGAGTCTAAGCACTGGATGAAGAAGATAGTAGAAAACAGTCTGGATGCTGGTGCCA
ASHGA5P025485	0.0111318	2.06484	1186	574.379	9.93632	9.31987	532.708	896.566	601.519	369.876	471.228	574.379	997.39	1098.7	1712.63	1170.67	950.635	1186	9.59695	9.00062	9.7704	9.47919	10.7117	9.58509	9.90824	9.34701	9.69431	9.18747	P	P	P	P	P	P	P	P	P	P	noncoding	NR_003085	PMS2	RefSeq	2846	chr7	-	6012869	6048737	CGAGCTGAGAGCTCGAGAACCTGCTAAGGCCATCAAACCTATTGATCGGAAGTCAGTCCA	exon sense-overlapping
ASHGA5P032879	0.0454487	2.06448	1764.8	854.837	10.4024	9.85585	1095.17	953.454	592.625	384.743	1248.2	854.838	1926.18	1270.39	1694.02	820.385	3113.02	1764.8	10.5465	10.1073	9.96263	9.55998	10.6993	9.56621	9.4021	9.40572	11.4016	10.6401	P	P	M	P	P	P	P	P	P	P	noncoding	NR_027167	C17orf76-AS1	RefSeq	1015	chr17	+	16342300	16345340	TTAGTTGACCGTAACTGCCAGAGCCCTGCCCTGAATTCCTGTCCTTACTCCCTCTTTAAG	natural antisense
ASHGA5P032879	0.0454487	2.06448	1764.8	854.837	10.4024	9.85585	1095.17	953.454	592.625	384.743	1248.2	854.838	1926.18	1270.39	1694.02	820.385	3113.02	1764.8	10.5465	10.1073	9.96263	9.55998	10.6993	9.56621	9.4021	9.40572	11.4016	10.6401	P	P	M	P	P	P	P	P	P	P	noncoding	NR_027167	C17orf76-AS1	RefSeq	1015	chr17	+	16342300	16345340	TTAGTTGACCGTAACTGCCAGAGCCCTGCCCTGAATTCCTGTCCTTACTCCCTCTTTAAG	natural antisense
ASHGA5P006985	0.0187213	2.06346	676.028	327.618	9.16217	8.51258	263.772	482.656	358.434	298.204	235.026	327.618	761.293	666.629	635.79	790.212	526.215	676.028	9.22979	7.94537	9.06057	8.57559	9.32421	8.87401	9.34981	9.02371	8.8465	8.14422	P	P	P	P	P	P	P	P	P	P	noncoding	uc002tkf.2	WASH2P	UCSC_knowngene	792	chr2	+	114353260	114355215	TCTCCTTCAGTCCAGGGAGCTCCCAGGGAAGTGGTCGACCCCTCCGGTGGCCGGGCCACT	intergenic
ASHGA5P018309	0.0117948	2.06223	1506.05	730.3	10.2685	9.70744	680.883	1042.09	766.594	584.099	577.832	730.3	1157.85	1216.15	1969.56	1883.56	1303.11	1506.05	9.80777	9.37483	9.89713	9.69297	10.9254	9.94231	10.5861	10.032	10.1262	9.49506	P	P	P	P	P	P	P	P	P	P	noncoding	ENST00000451831	PMS2P11	pseudogene	574	chr7	+	76640867	76645170	CTTTGTGCACAGTGATGTCACCATTTCTACCTGCCACGTATCGGCGAAGGTTGGGACTCG
ASHGA5P019020	0.0309944	2.05989	1005.19	487.981	9.65745	9.04131	607.247	810.489	357.115	265.808	399.245	487.981	947.563	1228.7	549.374	849.072	1451.22	1005.19	9.53609	9.19771	9.90851	9.3369	9.11733	8.86693	9.45101	8.85386	10.2743	8.95116	P	P	P	M	P	P	P	P	P	P	noncoding	NR_028476	RBMX	RefSeq	1925	chrX	-	135955605	135962939	GAATGGAAAGATGACGGTGGATATTCCATGAATTTTAACATGAGTTCTTCCAGGGGACCA	exon sense-overlapping
ASHGA5P019020	0.0309944	2.05989	1005.19	487.981	9.65745	9.04131	607.247	810.489	357.115	265.808	399.245	487.981	947.563	1228.7	549.374	849.072	1451.22	1005.19	9.53609	9.19771	9.90851	9.3369	9.11733	8.86693	9.45101	8.85386	10.2743	8.95116	P	P	P	M	P	P	P	P	P	P	noncoding	NR_028476	RBMX	RefSeq	1925	chrX	-	135955605	135962939	GAATGGAAAGATGACGGTGGATATTCCATGAATTTTAACATGAGTTCTTCCAGGGGACCA	exon sense-overlapping
ASHGA5P034766	0.0245892	2.05983	87.9194	42.6829	6.29286	5.4942	42.9434	45.7881	55.974	32.0467	36.6625	42.6829	110.137	78.2507	68.1299	99.9882	83.0918	87.9194	6.44921	5.07423	6.07803	5.26476	6.21634	6.23836	6.4833	5.54705	6.23742	5.34661	P	P	M	P	P	P	P	P	P	P	noncoding	ENST00000452378	RP4-635E18.7	GENCODE	2682	chr1	+	11128527	11133154	TGTGCTCTCATTCTTACTCATAATGCTGGTAAAAACAAGCCAGATAAGTAAGATAGAGTG	natural antisense
ASHGA5P034766	0.0245892	2.05983	87.9194	42.6829	6.29286	5.4942	42.9434	45.7881	55.974	32.0467	36.6625	42.6829	110.137	78.2507	68.1299	99.9882	83.0918	87.9194	6.44921	5.07423	6.07803	5.26476	6.21634	6.23836	6.4833	5.54705	6.23742	5.34661	P	P	M	P	P	P	P	P	P	P	noncoding	ENST00000452378	RP4-635E18.7	GENCODE	2682	chr1	+	11128527	11133154	TGTGCTCTCATTCTTACTCATAATGCTGGTAAAAACAAGCCAGATAAGTAAGATAGAGTG	natural antisense
ASHGA5P058465	0.0110102	2.05781	1163.16	565.245	9.90755	9.2854	522.997	906.839	596.838	354.58	444.968	565.245	1034.17	1097	1602.57	1262.36	819.72	1163.16	9.65219	8.97106	9.7686	9.49359	10.6242	9.57517	10.0187	9.2784	9.47409	9.10878	P	P	P	P	P	P	P	P	P	P	noncoding	uc003txn.4	PMS2L2	UCSC_knowngene	600	chr7	+	72476665	72519759	AGAGCTGAGAGCTCGAGAACCTGCTAAGGCCATCAAACCTATTGATCGGAAGTCAGTCCA	bidirectional
ASHGA5P058465	0.0110102	2.05781	1163.16	565.245	9.90755	9.2854	522.997	906.839	596.838	354.58	444.968	565.245	1034.17	1097	1602.57	1262.36	819.72	1163.16	9.65219	8.97106	9.7686	9.49359	10.6242	9.57517	10.0187	9.2784	9.47409	9.10878	P	P	P	P	P	P	P	P	P	P	noncoding	uc003txn.4	PMS2L2	UCSC_knowngene	600	chr7	+	72476665	72519759	AGAGCTGAGAGCTCGAGAACCTGCTAAGGCCATCAAACCTATTGATCGGAAGTCAGTCCA	bidirectional
ASHGA5P058465	0.0110102	2.05781	1163.16	565.245	9.90755	9.2854	522.997	906.839	596.838	354.58	444.968	565.245	1034.17	1097	1602.57	1262.36	819.72	1163.16	9.65219	8.97106	9.7686	9.49359	10.6242	9.57517	10.0187	9.2784	9.47409	9.10878	P	P	P	P	P	P	P	P	P	P	noncoding	uc003txn.4	PMS2L2	UCSC_knowngene	600	chr7	+	72476665	72519759	AGAGCTGAGAGCTCGAGAACCTGCTAAGGCCATCAAACCTATTGATCGGAAGTCAGTCCA	bidirectional
ASHGA5P058465	0.0110102	2.05781	1163.16	565.245	9.90755	9.2854	522.997	906.839	596.838	354.58	444.968	565.245	1034.17	1097	1602.57	1262.36	819.72	1163.16	9.65219	8.97106	9.7686	9.49359	10.6242	9.57517	10.0187	9.2784	9.47409	9.10878	P	P	P	P	P	P	P	P	P	P	noncoding	uc003txn.4	PMS2L2	UCSC_knowngene	600	chr7	+	72476665	72519759	AGAGCTGAGAGCTCGAGAACCTGCTAAGGCCATCAAACCTATTGATCGGAAGTCAGTCCA	bidirectional
ASHGA5P058465	0.0110102	2.05781	1163.16	565.245	9.90755	9.2854	522.997	906.839	596.838	354.58	444.968	565.245	1034.17	1097	1602.57	1262.36	819.72	1163.16	9.65219	8.97106	9.7686	9.49359	10.6242	9.57517	10.0187	9.2784	9.47409	9.10878	P	P	P	P	P	P	P	P	P	P	noncoding	uc003txn.4	PMS2L2	UCSC_knowngene	600	chr7	+	72476665	72519759	AGAGCTGAGAGCTCGAGAACCTGCTAAGGCCATCAAACCTATTGATCGGAAGTCAGTCCA	bidirectional
ASHGA5P017725	0.0236041	2.05506	288.839	140.55	7.90789	7.27822	165.171	187.884	139.185	100.425	110.087	140.551	283.01	294.485	183.719	446.293	236.69	288.839	7.81273	7.23465	7.88906	7.23848	7.57852	7.53496	8.55363	7.40443	7.70552	6.97858	P	P	P	P	P	P	P	P	P	P	noncoding	uc009vjo.1	LOC643837	UCSC_knowngene	517	chr1	+	763063	788997	TGGAGTGATCTGGGACCAAAGACATCTAGGCTTGCTGTCAAGGCTTCTGATCAACATGAG	intergenic
ASHGA5P030720	0.0477556	2.05377	2126.78	1035.55	10.5415	10.0298	2383.48	705.485	645.643	558.744	884.394	1035.55	4985.08	1110	1359.46	1056.46	2122.9	2126.78	11.9272	11.234	9.7812	9.12141	10.399	9.68517	9.75812	9.97093	10.8421	10.1376	P	P	P	P	P	P	P	P	M	P	noncoding	uc010upk.1	AK301968	UCSC_knowngene	449	chr15	+	85788460	85790410	GCTGCATGCCATTCTTTTCGGGCTGCCGAGAACAGGGAGCTAAACATCACCATCATCTAA	intergenic
ASHGA5P058567	0.017271	2.04911	1454.88	710.007	10.2203	9.63598	722.742	1083.72	730.682	442.607	570.28	710.007	1186.87	1348.06	2057.39	1580.46	1101.62	1454.88	9.84338	9.46014	10.0522	9.75685	10.9837	9.87195	10.3259	9.61544	9.89645	9.47555	P	P	P	P	P	P	P	P	P	P	noncoding	uc010lbw.2	PMS2P5	UCSC_knowngene	1126	chr7	+	74306893	74322330	AGAGCTGGAGAACCTGCTAAGGCCATCAAACCTATTGATCGGAAGTCAGTCCATCAGATT	intergenic
ASHGA5P043502	0.0396007	2.04889	599.351	292.525	8.9348	8.35339	280.675	434.933	246.159	280.653	220.204	292.525	768.962	502.177	558.571	829.216	337.827	599.351	9.24691	8.03522	8.64439	8.41566	9.14342	8.33954	9.41981	8.92919	8.21947	8.04732	P	P	P	P	P	M	P	P	P	P	noncoding	ENST00000564837	RP11-611L7.1	GENCODE	1569	chr7	+	6694494	6696063	ATTTTTGGTGCAGCTGCATTCCCTAATAGACCTAGTTCCCTCCACGTTAGTGTAGACATG	intergenic
ASHGA5P015857	0.0384396	2.04177	140.732	68.9264	6.88696	6.15392	85.2063	103.888	58.6139	38.4897	58.4342	68.9264	223.798	124.224	75.8353	151.249	128.553	140.732	7.48558	6.17177	6.70305	6.39925	6.36884	6.30541	7.0403	5.87568	6.83704	6.01745	P	P	P	P	P	P	P	P	P	P	noncoding	ENST00000456953	RP4-564F22.2	GENCODE	546	chr20	-	37055102	37063976	ACACTGGCGGGCCTTGTGGGCTGTGCTGCACCTCGGACGGCTTCGCACCAGCCAGCGCCC	intergenic
ASHGA5P054995	4.44544e-05	2.03154	355.527	175.003	8.24032	7.52217	213.342	287.06	126.665	90.8123	157.135	175.003	420.688	424.936	277.017	295.313	359.68	355.527	8.36178	7.6154	8.40507	7.8328	8.16738	7.39686	7.96554	7.24106	8.30182	7.52474	P	P	P	P	P	P	P	P	P	P	noncoding	ENST00000528684	FAM86C2P	pseudogene	1004	chr11	-	67560666	67572784	AAGAGACTCATCAGATTCTGAGCTGCTGCGGGATATTTTGCAGAAGGTAAGAATTCCAGA
ASHGA5P043150	0.00699522	2.03102	241.56	118.935	7.69562	6.9653	113.635	203.677	108.094	70.9059	98.3634	118.935	294.723	291.081	193.698	198.055	230.242	241.56	7.86903	6.63272	7.87119	7.35504	7.65891	7.16954	7.41387	6.86597	7.6651	6.80324	P	P	P	P	P	P	P	P	P	P	noncoding	uc003uch.1	PMS2L2	UCSC_knowngene	957	chr7	-	74880904	74987787	ACATCCTAATTTGCGTAGCTGCTCAGTTTTAAAAAATGCAATGCATTTTTACCTCTTAGG	intergenic
ASHGA5P019506	0.00936217	2.02977	198.83	97.9566	7.38006	6.72117	103.572	139.091	68.4106	67.8628	110.846	97.9566	227.194	255.353	99.3867	184.671	227.544	198.83	7.50515	6.48441	7.69233	6.8106	6.74118	6.52098	7.31442	6.80153	7.64722	6.98831	P	P	P	P	P	P	P	P	P	P	noncoding	NR_051968	MRPS2	RefSeq	1714	chr9	+	138392476	138396519	AACCTGTAAGGTTTATGGAGCCGTACATCTTTGGGAGCCGCCTGGACCACGACATCATCG	exon sense-overlapping
ASHGA5P017559	0.0287101	2.0292	820.24	404.219	9.41245	8.75734	503.498	633.02	404.289	208.651	271.638	404.219	812.154	777.691	779.172	1176.47	555.714	820.24	9.32879	8.91002	9.27551	8.96547	9.62697	9.0401	9.91537	8.50147	8.9156	8.36964	P	P	P	P	P	P	P	P	P	P	noncoding	uc003tui.3	CCT6P1	UCSC_knowngene	1528	chr7	+	65216091	65228662	CCATAAAGATGGCCTTCATCCCAGAATAATCACTGAAGGATTTGAAGCTGTGAAGGAAAA	intergenic
ASHGA5P030980	0.0443308	2.01531	110.647	54.903	6.58975	5.89362	77.3863	54.0328	45.7277	49.0711	48.2972	54.903	86.9586	159.501	91.948	124.525	90.3001	110.647	6.11674	6.02291	7.05537	5.49214	6.63539	5.933	6.7871	6.27567	6.35414	5.7444	P	P	P	P	P	P	P	P	P	P	noncoding	ENST00000548268	MIR3180-1	GENCODE	1459	chr16	-	15003743	15005202	TTGAAAGACAAGAGGGAGGAAACCCACATCCTTCATTCCCCATCCATTCATTTATTGCCT	intergenic
ASHGA5P025869	0.0353681	2.01209	94.2349	46.8342	6.31267	5.61429	47.0623	69.4015	30.9997	41.7995	44.9081	46.8342	44.3177	124.372	76.4145	97.0101	129.06	94.2349	5.19352	5.22655	6.70448	5.8476	6.38046	5.34806	6.44222	6.01099	6.84268	5.63825	P	P	P	P	P	P	P	P	P	P	noncoding	NR_045090	TPD52L2	RefSeq	2328	chr20	+	62496580	62522898	TGAGAAAGTGACCCAGTCAGACCTGCAGGACAGAAGACTTCAGCTGCCCTGTCCACAGTG	exon sense-overlapping
ASHGA5P025869	0.0353681	2.01209	94.2349	46.8342	6.31267	5.61429	47.0623	69.4015	30.9997	41.7995	44.9081	46.8342	44.3177	124.372	76.4145	97.0101	129.06	94.2349	5.19352	5.22655	6.70448	5.8476	6.38046	5.34806	6.44222	6.01099	6.84268	5.63825	P	P	P	P	P	P	P	P	P	P	noncoding	NR_045090	TPD52L2	RefSeq	2328	chr20	+	62496580	62522898	TGAGAAAGTGACCCAGTCAGACCTGCAGGACAGAAGACTTCAGCTGCCCTGTCCACAGTG	exon sense-overlapping
ASHGA5P025869	0.0353681	2.01209	94.2349	46.8342	6.31267	5.61429	47.0623	69.4015	30.9997	41.7995	44.9081	46.8342	44.3177	124.372	76.4145	97.0101	129.06	94.2349	5.19352	5.22655	6.70448	5.8476	6.38046	5.34806	6.44222	6.01099	6.84268	5.63825	P	P	P	P	P	P	P	P	P	P	noncoding	NR_045090	TPD52L2	RefSeq	2328	chr20	+	62496580	62522898	TGAGAAAGTGACCCAGTCAGACCTGCAGGACAGAAGACTTCAGCTGCCCTGTCCACAGTG	exon sense-overlapping
ASHGA5P025869	0.0353681	2.01209	94.2349	46.8342	6.31267	5.61429	47.0623	69.4015	30.9997	41.7995	44.9081	46.8342	44.3177	124.372	76.4145	97.0101	129.06	94.2349	5.19352	5.22655	6.70448	5.8476	6.38046	5.34806	6.44222	6.01099	6.84268	5.63825	P	P	P	P	P	P	P	P	P	P	noncoding	NR_045090	TPD52L2	RefSeq	2328	chr20	+	62496580	62522898	TGAGAAAGTGACCCAGTCAGACCTGCAGGACAGAAGACTTCAGCTGCCCTGTCCACAGTG	exon sense-overlapping
ASHGA5P025869	0.0353681	2.01209	94.2349	46.8342	6.31267	5.61429	47.0623	69.4015	30.9997	41.7995	44.9081	46.8342	44.3177	124.372	76.4145	97.0101	129.06	94.2349	5.19352	5.22655	6.70448	5.8476	6.38046	5.34806	6.44222	6.01099	6.84268	5.63825	P	P	P	P	P	P	P	P	P	P	noncoding	NR_045090	TPD52L2	RefSeq	2328	chr20	+	62496580	62522898	TGAGAAAGTGACCCAGTCAGACCTGCAGGACAGAAGACTTCAGCTGCCCTGTCCACAGTG	exon sense-overlapping
ASHGA5P025869	0.0353681	2.01209	94.2349	46.8342	6.31267	5.61429	47.0623	69.4015	30.9997	41.7995	44.9081	46.8342	44.3177	124.372	76.4145	97.0101	129.06	94.2349	5.19352	5.22655	6.70448	5.8476	6.38046	5.34806	6.44222	6.01099	6.84268	5.63825	P	P	P	P	P	P	P	P	P	P	noncoding	NR_045090	TPD52L2	RefSeq	2328	chr20	+	62496580	62522898	TGAGAAAGTGACCCAGTCAGACCTGCAGGACAGAAGACTTCAGCTGCCCTGTCCACAGTG	exon sense-overlapping
ASHGA5P025869	0.0353681	2.01209	94.2349	46.8342	6.31267	5.61429	47.0623	69.4015	30.9997	41.7995	44.9081	46.8342	44.3177	124.372	76.4145	97.0101	129.06	94.2349	5.19352	5.22655	6.70448	5.8476	6.38046	5.34806	6.44222	6.01099	6.84268	5.63825	P	P	P	P	P	P	P	P	P	P	noncoding	NR_045090	TPD52L2	RefSeq	2328	chr20	+	62496580	62522898	TGAGAAAGTGACCCAGTCAGACCTGCAGGACAGAAGACTTCAGCTGCCCTGTCCACAGTG	exon sense-overlapping
ASHGA5P025869	0.0353681	2.01209	94.2349	46.8342	6.31267	5.61429	47.0623	69.4015	30.9997	41.7995	44.9081	46.8342	44.3177	124.372	76.4145	97.0101	129.06	94.2349	5.19352	5.22655	6.70448	5.8476	6.38046	5.34806	6.44222	6.01099	6.84268	5.63825	P	P	P	P	P	P	P	P	P	P	noncoding	NR_045090	TPD52L2	RefSeq	2328	chr20	+	62496580	62522898	TGAGAAAGTGACCCAGTCAGACCTGCAGGACAGAAGACTTCAGCTGCCCTGTCCACAGTG	exon sense-overlapping
ASHGA5P025869	0.0353681	2.01209	94.2349	46.8342	6.31267	5.61429	47.0623	69.4015	30.9997	41.7995	44.9081	46.8342	44.3177	124.372	76.4145	97.0101	129.06	94.2349	5.19352	5.22655	6.70448	5.8476	6.38046	5.34806	6.44222	6.01099	6.84268	5.63825	P	P	P	P	P	P	P	P	P	P	noncoding	NR_045090	TPD52L2	RefSeq	2328	chr20	+	62496580	62522898	TGAGAAAGTGACCCAGTCAGACCTGCAGGACAGAAGACTTCAGCTGCCCTGTCCACAGTG	exon sense-overlapping
ASHGA5P025869	0.0353681	2.01209	94.2349	46.8342	6.31267	5.61429	47.0623	69.4015	30.9997	41.7995	44.9081	46.8342	44.3177	124.372	76.4145	97.0101	129.06	94.2349	5.19352	5.22655	6.70448	5.8476	6.38046	5.34806	6.44222	6.01099	6.84268	5.63825	P	P	P	P	P	P	P	P	P	P	noncoding	NR_045090	TPD52L2	RefSeq	2328	chr20	+	62496580	62522898	TGAGAAAGTGACCCAGTCAGACCTGCAGGACAGAAGACTTCAGCTGCCCTGTCCACAGTG	exon sense-overlapping
ASHGA5P048257	0.00816689	2.01039	65.1615	32.4124	5.87492	4.92583	28.5506	60.19	33.7842	24.0775	15.4598	32.4124	48.0326	81.8163	69.9819	66.8662	59.1106	65.1615	5.29723	4.37344	6.13572	5.6429	6.25756	5.4862	5.92655	5.03455	5.75754	4.0921	P	P	P	P	P	P	P	P	P	P	noncoding	ENST00000528089	FAM86C2P	GENCODE	2496	chr11	-	67559254	67565140	TTTCCATCTAATGGCCCAAATGGTCAAATGGCATCTACTAGTCTCATATGACCGCTGCCT	intergenic
ASHGA5P053104	0.00774353	2.00817	78.4616	39.0712	6.11057	5.36178	43.7503	52.6189	34.413	32.5336	32.0402	39.0712	59.9306	101.295	100.229	72.8042	58.0499	78.4616	5.5983	5.10903	6.42631	5.45756	6.75181	5.51751	6.04404	5.57381	5.73239	5.15098	P	P	M	P	P	P	P	P	P	P	noncoding	ENST00000412466	PMS2P4	pseudogene	1052	chr7	-	66760594	66767894	GGGAGTCGTGGAGGGAACTTTCCCAGGCCCCGAGGCGGATCGGGTATTGAGTCCATGGAG
ASHGA5P022111	0.0229784	2.00781	62776	31265.9	15.7632	15.118	29789	45972	32040.5	19062.3	29465.8	31265.9	79258.6	46881.3	64085.7	55804.5	67849.8	62776	16.0826	14.9742	15.3456	15.3371	15.8502	15.1871	15.6196	14.9795	15.9178	15.1121	P	P	M	P	P	P	P	P	P	P	noncoding	NR_073022	RPL18	RefSeq	885	chr19	-	49118583	49122675	GTTGGTCAAGGTTTCTGGCCAGAAGAACCAACTCCACATTCAACCAGGTTGTGTTGAAGA	exon sense-overlapping
ASHGA5P022111	0.0229784	2.00781	62776	31265.9	15.7632	15.118	29789	45972	32040.5	19062.3	29465.8	31265.9	79258.6	46881.3	64085.7	55804.5	67849.8	62776	16.0826	14.9742	15.3456	15.3371	15.8502	15.1871	15.6196	14.9795	15.9178	15.1121	P	P	M	P	P	P	P	P	P	P	noncoding	NR_073022	RPL18	RefSeq	885	chr19	-	49118583	49122675	GTTGGTCAAGGTTTCTGGCCAGAAGAACCAACTCCACATTCAACCAGGTTGTGTTGAAGA	exon sense-overlapping
ASHGA5P022111	0.0229784	2.00781	62776	31265.9	15.7632	15.118	29789	45972	32040.5	19062.3	29465.8	31265.9	79258.6	46881.3	64085.7	55804.5	67849.8	62776	16.0826	14.9742	15.3456	15.3371	15.8502	15.1871	15.6196	14.9795	15.9178	15.1121	P	P	M	P	P	P	P	P	P	P	noncoding	NR_073022	RPL18	RefSeq	885	chr19	-	49118583	49122675	GTTGGTCAAGGTTTCTGGCCAGAAGAACCAACTCCACATTCAACCAGGTTGTGTTGAAGA	natural antisense
ASHGA5P022111	0.0229784	2.00781	62776	31265.9	15.7632	15.118	29789	45972	32040.5	19062.3	29465.8	31265.9	79258.6	46881.3	64085.7	55804.5	67849.8	62776	16.0826	14.9742	15.3456	15.3371	15.8502	15.1871	15.6196	14.9795	15.9178	15.1121	P	P	M	P	P	P	P	P	P	P	noncoding	NR_073022	RPL18	RefSeq	885	chr19	-	49118583	49122675	GTTGGTCAAGGTTTCTGGCCAGAAGAACCAACTCCACATTCAACCAGGTTGTGTTGAAGA	natural antisense
ASHGA5P022111	0.0229784	2.00781	62776	31265.9	15.7632	15.118	29789	45972	32040.5	19062.3	29465.8	31265.9	79258.6	46881.3	64085.7	55804.5	67849.8	62776	16.0826	14.9742	15.3456	15.3371	15.8502	15.1871	15.6196	14.9795	15.9178	15.1121	P	P	M	P	P	P	P	P	P	P	noncoding	NR_073022	RPL18	RefSeq	885	chr19	-	49118583	49122675	GTTGGTCAAGGTTTCTGGCCAGAAGAACCAACTCCACATTCAACCAGGTTGTGTTGAAGA	natural antisense
ASHGA5P038421	0.00854528	2.00737	509.998	254.063	8.74732	8.16783	260.941	352.651	228.592	206.085	222.049	254.063	365.606	602.853	557.617	585.839	438.076	509.998	8.15922	7.93155	8.90872	8.13026	9.13984	8.23244	8.93587	8.48454	8.59295	8.06035	P	P	M	P	P	P	P	P	P	P	noncoding	uc003ene.2	FAM86HP	UCSC_knowngene	1886	chr3	-	129816624	129822720	GGGATGTAGCGACGGTCCATCAGCTCTCTGCCTTCCAGCCAGATGTTGTCATTACAGCAG	natural antisense
ASHGA5P025729	0.0416591	2.00214	2236.39	1117	10.8481	10.3448	1273.77	1443.49	1005.2	760.202	1102.35	1117	1631.29	2900.38	1848.97	2171.32	2630.01	2236.4	10.3038	10.3428	11.1774	10.1842	10.8287	10.3292	10.7798	10.3959	11.1508	10.4721	P	P	P	P	P	P	P	P	P	P	noncoding	NR_028436	UBE2L3	RefSeq	3137	chr22	+	21921835	21978323	GACTTTAGCCACCCACAAGTACAGAAAATAATCCAGTCCCTCATAGCACTGGTGAATGAC	exon sense-overlapping
ASHGA5P025729	0.0416591	2.00214	2236.39	1117	10.8481	10.3448	1273.77	1443.49	1005.2	760.202	1102.35	1117	1631.29	2900.38	1848.97	2171.32	2630.01	2236.4	10.3038	10.3428	11.1774	10.1842	10.8287	10.3292	10.7798	10.3959	11.1508	10.4721	P	P	P	P	P	P	P	P	P	P	noncoding	NR_028436	UBE2L3	RefSeq	3137	chr22	+	21921835	21978323	GACTTTAGCCACCCACAAGTACAGAAAATAATCCAGTCCCTCATAGCACTGGTGAATGAC	exon sense-overlapping
ASHGA5P025729	0.0416591	2.00214	2236.39	1117	10.8481	10.3448	1273.77	1443.49	1005.2	760.202	1102.35	1117	1631.29	2900.38	1848.97	2171.32	2630.01	2236.4	10.3038	10.3428	11.1774	10.1842	10.8287	10.3292	10.7798	10.3959	11.1508	10.4721	P	P	P	P	P	P	P	P	P	P	noncoding	NR_028436	UBE2L3	RefSeq	3137	chr22	+	21921835	21978323	GACTTTAGCCACCCACAAGTACAGAAAATAATCCAGTCCCTCATAGCACTGGTGAATGAC	exon sense-overlapping
ASHGA5P013591	0.0255327	1.99782	1347.57	674.523	10.1043	9.56138	685.84	1027.31	701.566	435.896	521.997	674.523	1052.23	1195.76	1940.96	1503.53	1045.39	1347.57	9.677	9.38799	9.87686	9.67056	10.899	9.81238	10.2497	9.5985	9.81877	9.33747	P	P	M	P	P	P	P	P	M	P	noncoding	ENST00000430602	PMS2P3	GENCODE	1005	chr7	-	75137071	75157166	ACATAGTCCAGTACAGAACCTGCTAAGGCCATCAAACCTATTGATCGGAAGTCAGTCCAT	intergenic
ASHGA5P014894	0.0105778	1.9941	1296.58	650.208	10.0615	9.51666	648.716	939.944	691.449	407.29	563.644	650.208	1163.04	1201.22	1770.66	1355.82	992.156	1296.58	9.81415	9.29844	9.88058	9.54161	10.7594	9.79002	10.1039	9.49916	9.74937	9.45407	P	P	P	P	P	P	P	P	P	P	noncoding	uc003tvr.4	PMS2P4	UCSC_knowngene	569	chr7	-	66757422	66767406	AGAGCTAGAGTACAGAACCTGCTAAGGCCATCAAACCTATCGATCGGAAGTCAGTCCATC	intergenic
ASHGA5P019018	0.0410044	1.99379	218.994	109.838	7.5243	6.8845	86.6305	152.491	135.843	78.4162	95.8098	109.838	172.494	326.79	155.947	243.302	196.438	218.994	7.1093	6.199	8.03862	6.93353	7.34128	7.49789	7.68933	7.02907	7.44296	6.76301	P	M	P	P	P	P	P	P	P	P	noncoding	NR_027365	C12orf32	RefSeq	1710	chr12	+	2986364	2998691	GCCCGGGCTGGTATCACCTGATTTTGATACAGCAGCAGGAAGCTTGTTCCCAGCCTACCA	exon sense-overlapping
ASHGA5P019018	0.0410044	1.99379	218.994	109.838	7.5243	6.8845	86.6305	152.491	135.843	78.4162	95.8098	109.838	172.494	326.79	155.947	243.302	196.438	218.994	7.1093	6.199	8.03862	6.93353	7.34128	7.49789	7.68933	7.02907	7.44296	6.76301	P	M	P	P	P	P	P	P	P	P	noncoding	NR_027365	C12orf32	RefSeq	1710	chr12	+	2986364	2998691	GCCCGGGCTGGTATCACCTGATTTTGATACAGCAGCAGGAAGCTTGTTCCCAGCCTACCA	exon sense-overlapping
ASHGA5P019018	0.0410044	1.99379	218.994	109.838	7.5243	6.8845	86.6305	152.491	135.843	78.4162	95.8098	109.838	172.494	326.79	155.947	243.302	196.438	218.994	7.1093	6.199	8.03862	6.93353	7.34128	7.49789	7.68933	7.02907	7.44296	6.76301	P	M	P	P	P	P	P	P	P	P	noncoding	NR_027365	C12orf32	RefSeq	1710	chr12	+	2986364	2998691	GCCCGGGCTGGTATCACCTGATTTTGATACAGCAGCAGGAAGCTTGTTCCCAGCCTACCA	exon sense-overlapping
ASHGA5P019018	0.0410044	1.99379	218.994	109.838	7.5243	6.8845	86.6305	152.491	135.843	78.4162	95.8098	109.838	172.494	326.79	155.947	243.302	196.438	218.994	7.1093	6.199	8.03862	6.93353	7.34128	7.49789	7.68933	7.02907	7.44296	6.76301	P	M	P	P	P	P	P	P	P	P	noncoding	NR_027365	C12orf32	RefSeq	1710	chr12	+	2986364	2998691	GCCCGGGCTGGTATCACCTGATTTTGATACAGCAGCAGGAAGCTTGTTCCCAGCCTACCA	exon sense-overlapping
ASHGA5P037195	0.0256198	1.98864	197.282	99.2043	7.41827	6.78949	106.803	113.363	86.2931	82.44	107.123	99.2043	149.402	220.129	237.859	175.474	203.544	197.282	6.90055	6.53829	7.4904	6.52299	7.95893	6.85017	7.24522	7.10321	7.49627	6.93278	P	P	P	P	P	P	P	P	P	P	noncoding	uc002yjj.4	ANKRD20A11P	UCSC_knowngene	2554	chr21	-	15349067	15352765	GACTTAATCTCCTTGAAACTTTATCTCCCACCTTTCAAACAAAAGCATTTCTGAAGTTAG	intergenic
ASHGA5P018047	0.0487669	1.98299	81.7356	41.2184	6.13158	5.43015	59.5042	47.8179	34.6511	31.1268	32.9918	41.2184	96.2035	76.7705	51.0325	57.8754	126.796	81.7356	6.25378	5.61044	6.05046	5.3234	5.8044	5.52936	5.73239	5.4955	6.81689	5.19205	P	P	P	P	P	P	P	P	P	P	noncoding	ENST00000448772	AC004166.7	pseudogene	893	chr7	-	74298810	74304518	AAGGACCAGAACCTGGGTGATATGCAGGAGAGCACACTGATAGAAATCCTTGTGTCCAGT
ASHGA5P040729	0.0377113	1.98032	1769.28	893.431	10.48	10.0309	857.552	1054.03	836.714	721.638	997.221	893.432	1211.68	1582.03	1789.26	2705.53	1557.89	1769.28	9.8774	9.72119	10.2828	9.71359	10.7759	10.0764	11.095	10.3205	10.3691	10.323	P	P	P	P	P	P	P	P	P	P	noncoding	ENST00000456469	RP11-763B22.6	GENCODE	408	chr1	+	148852392	148853717	CCCTGGAGCCTCCATCCCAGTTCCCACCACGCACCCGCTCCACAAATCCTGCCCAAGGTG	intergenic
ASHGA5P048256	0.0172988	1.97733	836.56	423.075	9.46462	8.84117	419.85	748.088	355.327	317.721	274.387	423.075	722.04	950.531	996.524	806.936	706.77	836.56	9.16249	8.63489	9.57071	9.20863	9.96433	8.85914	9.37444	9.12105	9.25113	8.38216	P	P	P	P	P	P	P	P	P	P	noncoding	ENST00000529253	FAM86C2P	GENCODE	1857	chr11	-	67559237	67572805	TCTATGTGGCCCTTACCATCTGCAACCCAGAGACGTGCCAGCTGTTCACCACTGAGCTAT	intergenic
ASHGA5P058464	0.00921789	1.9731	1320.45	669.227	10.089	9.55355	665.105	1003.06	703.412	427.801	546.753	669.227	1086.25	1249.36	1775.29	1405.95	1085.39	1320.45	9.71541	9.34063	9.93411	9.6353	10.764	9.81733	10.158	9.56932	9.87378	9.40514	P	P	P	P	P	P	P	P	P	P	noncoding	uc003txh.4	PMS2L2	UCSC_knowngene	1323	chr7	+	72476665	72519759	TATTAAGAAGTACAGAACCTGCTAAGGCCATCAAACCTATTGATCGGAAGTCAGTCCATC	bidirectional
ASHGA5P058464	0.00921789	1.9731	1320.45	669.227	10.089	9.55355	665.105	1003.06	703.412	427.801	546.753	669.227	1086.25	1249.36	1775.29	1405.95	1085.39	1320.45	9.71541	9.34063	9.93411	9.6353	10.764	9.81733	10.158	9.56932	9.87378	9.40514	P	P	P	P	P	P	P	P	P	P	noncoding	uc003txh.4	PMS2L2	UCSC_knowngene	1323	chr7	+	72476665	72519759	TATTAAGAAGTACAGAACCTGCTAAGGCCATCAAACCTATTGATCGGAAGTCAGTCCATC	bidirectional
ASHGA5P058464	0.00921789	1.9731	1320.45	669.227	10.089	9.55355	665.105	1003.06	703.412	427.801	546.753	669.227	1086.25	1249.36	1775.29	1405.95	1085.39	1320.45	9.71541	9.34063	9.93411	9.6353	10.764	9.81733	10.158	9.56932	9.87378	9.40514	P	P	P	P	P	P	P	P	P	P	noncoding	uc003txh.4	PMS2L2	UCSC_knowngene	1323	chr7	+	72476665	72519759	TATTAAGAAGTACAGAACCTGCTAAGGCCATCAAACCTATTGATCGGAAGTCAGTCCATC	bidirectional
ASHGA5P058464	0.00921789	1.9731	1320.45	669.227	10.089	9.55355	665.105	1003.06	703.412	427.801	546.753	669.227	1086.25	1249.36	1775.29	1405.95	1085.39	1320.45	9.71541	9.34063	9.93411	9.6353	10.764	9.81733	10.158	9.56932	9.87378	9.40514	P	P	P	P	P	P	P	P	P	P	noncoding	uc003txh.4	PMS2L2	UCSC_knowngene	1323	chr7	+	72476665	72519759	TATTAAGAAGTACAGAACCTGCTAAGGCCATCAAACCTATTGATCGGAAGTCAGTCCATC	bidirectional
ASHGA5P058464	0.00921789	1.9731	1320.45	669.227	10.089	9.55355	665.105	1003.06	703.412	427.801	546.753	669.227	1086.25	1249.36	1775.29	1405.95	1085.39	1320.45	9.71541	9.34063	9.93411	9.6353	10.764	9.81733	10.158	9.56932	9.87378	9.40514	P	P	P	P	P	P	P	P	P	P	noncoding	uc003txh.4	PMS2L2	UCSC_knowngene	1323	chr7	+	72476665	72519759	TATTAAGAAGTACAGAACCTGCTAAGGCCATCAAACCTATTGATCGGAAGTCAGTCCATC	bidirectional
ASHGA5P058369	0.0479597	1.97002	520.011	263.963	8.79769	8.18433	198.952	397.14	272.471	266.947	184.303	263.963	575.102	574.436	479.851	542.573	428.096	520.011	8.81794	7.51103	8.83191	8.2933	8.94658	8.48174	8.83445	8.86164	8.55755	7.77395	P	P	P	P	P	P	P	P	P	P	noncoding	uc002cdr.3	WASH3P	UCSC_knowngene	849	chr15	+	102514397	102516808	TCTCCTTCAGGGAGCTCCCAGGGAAGTGGTTGACCCCTCCGGTGGCCGGGCCACTCTGCT	intergenic
ASHGA5P023429	0.0075038	1.96666	564.647	287.11	8.90329	8.31286	286.786	439.204	231.318	185.508	292.734	287.11	657.014	679.641	464.523	445.787	576.27	564.647	9.01545	8.07305	9.08383	8.43403	8.89979	8.24938	8.55224	8.33365	8.96513	8.47418	P	P	P	P	P	P	P	P	P	P	noncoding	NR_045513	NT5C	RefSeq	1031	chr17	-	73126319	73127890	AACGACCTACCGGACCCCCTGCTGAAGTACCACCACTGTGTGGGTGAGAAGGTGTGGCTG	exon sense-overlapping
ASHGA5P023429	0.0075038	1.96666	564.647	287.11	8.90329	8.31286	286.786	439.204	231.318	185.508	292.734	287.11	657.014	679.641	464.523	445.787	576.27	564.647	9.01545	8.07305	9.08383	8.43403	8.89979	8.24938	8.55224	8.33365	8.96513	8.47418	P	P	P	P	P	P	P	P	P	P	noncoding	NR_045513	NT5C	RefSeq	1031	chr17	-	73126319	73127890	AACGACCTACCGGACCCCCTGCTGAAGTACCACCACTGTGTGGGTGAGAAGGTGTGGCTG	exon sense-overlapping
ASHGA5P023429	0.0075038	1.96666	564.647	287.11	8.90329	8.31286	286.786	439.204	231.318	185.508	292.734	287.11	657.014	679.641	464.523	445.787	576.27	564.647	9.01545	8.07305	9.08383	8.43403	8.89979	8.24938	8.55224	8.33365	8.96513	8.47418	P	P	P	P	P	P	P	P	P	P	noncoding	NR_045513	NT5C	RefSeq	1031	chr17	-	73126319	73127890	AACGACCTACCGGACCCCCTGCTGAAGTACCACCACTGTGTGGGTGAGAAGGTGTGGCTG	natural antisense
ASHGA5P014261	0.0251375	1.96239	137.972	70.3082	6.86525	6.22992	86.8454	67.3944	80.8122	41.296	75.1932	70.3082	115.695	125.56	147.047	83.3068	218.253	137.972	6.52247	6.20412	6.71573	5.80199	7.26819	6.75697	6.23049	5.99152	7.58939	6.395	P	P	P	P	P	P	P	P	P	P	noncoding	ENST00000431796	AC093642.5	GENCODE	565	chr2	+	243030843	243064556	TGTGGTCAAACTGCAGGACAAATTCGAGCATCTTAAAATGATTCAACAGGAGGAGATAAG	intergenic
ASHGA5P029614	0.0278786	1.95608	497.109	254.136	8.69586	8.08561	359.153	356.404	253.89	139.229	162.003	254.136	756.309	355.654	420.285	537.099	416.196	497.109	9.22127	8.41133	8.1557	8.14774	8.76464	8.38172	8.81977	7.91226	8.51794	7.575	P	P	P	P	P	P	P	P	P	P	noncoding	uc001xib.3	BC052775	UCSC_knowngene	2045	chr14	+	65453947	65455992	ACTCTTTCAGTTTTAACTAAAGCTTCCATTTACTGATAGCTCAATTTTGTGCCATTGCCA	intron sense-overlapping
ASHGA5P029614	0.0278786	1.95608	497.109	254.136	8.69586	8.08561	359.153	356.404	253.89	139.229	162.003	254.136	756.309	355.654	420.285	537.099	416.196	497.109	9.22127	8.41133	8.1557	8.14774	8.76464	8.38172	8.81977	7.91226	8.51794	7.575	P	P	P	P	P	P	P	P	P	P	noncoding	uc001xib.3	BC052775	UCSC_knowngene	2045	chr14	+	65453947	65455992	ACTCTTTCAGTTTTAACTAAAGCTTCCATTTACTGATAGCTCAATTTTGTGCCATTGCCA	intron sense-overlapping
ASHGA5P029614	0.0278786	1.95608	497.109	254.136	8.69586	8.08561	359.153	356.404	253.89	139.229	162.003	254.136	756.309	355.654	420.285	537.099	416.196	497.109	9.22127	8.41133	8.1557	8.14774	8.76464	8.38172	8.81977	7.91226	8.51794	7.575	P	P	P	P	P	P	P	P	P	P	noncoding	uc001xib.3	BC052775	UCSC_knowngene	2045	chr14	+	65453947	65455992	ACTCTTTCAGTTTTAACTAAAGCTTCCATTTACTGATAGCTCAATTTTGTGCCATTGCCA	intron sense-overlapping
ASHGA5P034039	0.00488397	1.94727	159.401	81.8587	7.08827	6.47136	94.4665	112.4	72.9687	66.3267	63.1315	81.8587	138.893	145.894	126.796	247.348	138.074	159.401	6.79181	6.33859	6.93174	6.51232	7.06665	6.61179	7.7146	6.7624	6.93652	6.1317	P	P	P	P	P	P	P	P	P	P	noncoding	uc001abp.1	LOC643837	UCSC_knowngene	854	chr1	+	763063	788997	GATTTAGGATAACTACTTAGAGGTTAAAAGTCACAAGGGTGTATGGATGAGGCTGGAGTG	intergenic
ASHGA5P051880	0.0017565	1.94149	99.3116	51.1522	6.44871	5.75962	55.2578	70.6384	43.7124	36.9334	49.219	51.1522	98.2597	133.927	71.2397	90.3055	102.826	99.3116	6.28219	5.48792	6.80608	5.87246	6.28552	5.86809	6.33995	5.80074	6.52978	5.76892	P	P	P	P	P	P	P	P	P	P	noncoding	ENST00000502255	FAM86EP	GENCODE	869	chr4	-	3949225	3954903	TTCAAGCCACAGCCCTCTTGCTGGAGACAGGCATACTCCCGTTCCAGTTGTCACCACATG	intergenic
ASHGA5P027966	0.031998	1.93286	57.0634	29.5227	5.55347	4.94135	36.6517	25.0823	33.5957	33.7784	18.5057	29.5227	42.1232	29.5805	106.568	75.7623	31.2829	57.0634	5.12693	4.80844	4.81871	4.41128	6.8361	5.47776	6.09685	5.64699	4.88876	4.36229	P	P	P	M	P	P	P	M	P	P	noncoding	ENST00000547395	RP11-386G11.5	GENCODE	858	chr12	+	49392180	49412502	AAGAAGCGGAGGAACAGGGTCACGGGATAGGGCAGACACCCGGCTGCTTTTTGTTTGCTA	intronic antisense
ASHGA5P027966	0.031998	1.93286	57.0634	29.5227	5.55347	4.94135	36.6517	25.0823	33.5957	33.7784	18.5057	29.5227	42.1232	29.5805	106.568	75.7623	31.2829	57.0634	5.12693	4.80844	4.81871	4.41128	6.8361	5.47776	6.09685	5.64699	4.88876	4.36229	P	P	P	M	P	P	P	M	P	P	noncoding	ENST00000547395	RP11-386G11.5	GENCODE	858	chr12	+	49392180	49412502	AAGAAGCGGAGGAACAGGGTCACGGGATAGGGCAGACACCCGGCTGCTTTTTGTTTGCTA	intronic antisense
ASHGA5P027966	0.031998	1.93286	57.0634	29.5227	5.55347	4.94135	36.6517	25.0823	33.5957	33.7784	18.5057	29.5227	42.1232	29.5805	106.568	75.7623	31.2829	57.0634	5.12693	4.80844	4.81871	4.41128	6.8361	5.47776	6.09685	5.64699	4.88876	4.36229	P	P	P	M	P	P	P	M	P	P	noncoding	ENST00000547395	RP11-386G11.5	GENCODE	858	chr12	+	49392180	49412502	AAGAAGCGGAGGAACAGGGTCACGGGATAGGGCAGACACCCGGCTGCTTTTTGTTTGCTA	natural antisense
ASHGA5P027966	0.031998	1.93286	57.0634	29.5227	5.55347	4.94135	36.6517	25.0823	33.5957	33.7784	18.5057	29.5227	42.1232	29.5805	106.568	75.7623	31.2829	57.0634	5.12693	4.80844	4.81871	4.41128	6.8361	5.47776	6.09685	5.64699	4.88876	4.36229	P	P	P	M	P	P	P	M	P	P	noncoding	ENST00000547395	RP11-386G11.5	GENCODE	858	chr12	+	49392180	49412502	AAGAAGCGGAGGAACAGGGTCACGGGATAGGGCAGACACCCGGCTGCTTTTTGTTTGCTA	natural antisense
ASHGA5P057186	0.0259915	1.92104	533.774	277.857	8.76301	8.13551	447.708	430.582	165.454	119.139	226.403	277.857	778.066	725.639	485.59	353.428	326.146	533.774	9.26646	8.74166	9.18636	8.40083	8.96273	7.76851	8.22976	7.67829	8.16972	8.08825	P	P	P	P	P	P	P	P	P	P	noncoding	TCONS_00014209	XLOC_006242	LincRNAs identified by Cabili et al	2432	chr7	+	128273068	128281168	AGATTTGAAGATGCTGCACTTCTGGCCTTGAATATGGAATCACGAGAAACAGGACCTTGC	intergenic
ASHGA5P028547	0.0373026	1.92068	1710.04	890.329	10.4458	10.021	881.663	1023.98	823.184	691.258	1031.56	890.329	1268.12	1545.6	1727.09	2437.47	1571.91	1710.04	9.94274	9.76164	10.2519	9.66535	10.719	10.0526	10.9318	10.2502	10.3838	10.3752	P	P	P	P	P	P	P	P	P	P	noncoding	ENST00000429055	AL358175.1	GENCODE	408	chr1	-	121139337	121140666	GGACCCTGGAGCCTCCATCCCAGTTCCCACCACGCACCCGCTCCACAAATCCTGCCCAAG	intergenic
ASHGA5P041403	0.0247143	1.91725	65.2156	34.0151	5.82686	5.11705	43.56	42.0661	37.6052	22.7507	24.0936	34.0151	114.335	52.2197	59.3439	43.9528	56.2262	65.2156	6.50591	5.10214	5.55296	5.14998	6.02401	5.65034	5.36646	4.9359	5.68497	4.74691	P	P	P	P	P	P	P	P	M	P	noncoding	TCONS_00021946	XLOC_010540	LincRNAs identified by Cabili et al	514	chr13	-	27752301	27760746	ATTTAAATTACGGTGGTGCCATGGAACAAGAGAAGGCAGATGAAGAGCGACACCCTTCAA	intergenic
ASHGA5P054800	0.00497263	1.90705	191.463	100.398	7.33192	6.79867	116.404	123.122	89.667	87.2607	85.5355	100.398	160.305	189.349	149.519	308.936	149.207	191.463	7.00019	6.67346	7.2842	6.63719	7.29086	6.9072	8.03153	7.18524	7.05284	6.59027	P	P	P	P	P	P	P	P	P	P	noncoding	uc001abq.1	LOC643837	UCSC_knowngene	701	chr1	+	763063	788997	TACTTAGAGGTTAAAAGTCACAAGGGTGTATGGATGAGGCTGGAGTGATCTGGGACCAAA	intergenic
ASHGA5P058359	0.0372756	1.89894	65.421	34.4513	5.88066	5.06332	32.6802	63.2287	22.9475	30.9048	22.4954	34.4513	72.5004	78.7351	55.0923	48.3005	72.4768	65.421	5.85597	4.61224	6.087	5.70974	5.91406	4.86019	5.49695	5.48419	6.04932	4.65024	P	P	P	M	P	P	P	P	P	P	noncoding	uc001vdo.1	DLEU2	UCSC_knowngene	3068	chr13	-	50556687	50699677	TAAGTATTTAGGCCTACTCTAGGTGCGGTACTTCACTATAGTTTATAAAAGATGGTCCCT	intronic antisense
ASHGA5P058359	0.0372756	1.89894	65.421	34.4513	5.88066	5.06332	32.6802	63.2287	22.9475	30.9048	22.4954	34.4513	72.5004	78.7351	55.0923	48.3005	72.4768	65.421	5.85597	4.61224	6.087	5.70974	5.91406	4.86019	5.49695	5.48419	6.04932	4.65024	P	P	P	M	P	P	P	P	P	P	noncoding	uc001vdo.1	DLEU2	UCSC_knowngene	3068	chr13	-	50556687	50699677	TAAGTATTTAGGCCTACTCTAGGTGCGGTACTTCACTATAGTTTATAAAAGATGGTCCCT	intronic antisense
ASHGA5P058359	0.0372756	1.89894	65.421	34.4513	5.88066	5.06332	32.6802	63.2287	22.9475	30.9048	22.4954	34.4513	72.5004	78.7351	55.0923	48.3005	72.4768	65.421	5.85597	4.61224	6.087	5.70974	5.91406	4.86019	5.49695	5.48419	6.04932	4.65024	P	P	P	M	P	P	P	P	P	P	noncoding	uc001vdo.1	DLEU2	UCSC_knowngene	3068	chr13	-	50556687	50699677	TAAGTATTTAGGCCTACTCTAGGTGCGGTACTTCACTATAGTTTATAAAAGATGGTCCCT	natural antisense
ASHGA5P058359	0.0372756	1.89894	65.421	34.4513	5.88066	5.06332	32.6802	63.2287	22.9475	30.9048	22.4954	34.4513	72.5004	78.7351	55.0923	48.3005	72.4768	65.421	5.85597	4.61224	6.087	5.70974	5.91406	4.86019	5.49695	5.48419	6.04932	4.65024	P	P	P	M	P	P	P	P	P	P	noncoding	uc001vdo.1	DLEU2	UCSC_knowngene	3068	chr13	-	50556687	50699677	TAAGTATTTAGGCCTACTCTAGGTGCGGTACTTCACTATAGTTTATAAAAGATGGTCCCT	natural antisense
ASHGA5P058359	0.0372756	1.89894	65.421	34.4513	5.88066	5.06332	32.6802	63.2287	22.9475	30.9048	22.4954	34.4513	72.5004	78.7351	55.0923	48.3005	72.4768	65.421	5.85597	4.61224	6.087	5.70974	5.91406	4.86019	5.49695	5.48419	6.04932	4.65024	P	P	P	M	P	P	P	P	P	P	noncoding	uc001vdo.1	DLEU2	UCSC_knowngene	3068	chr13	-	50556687	50699677	TAAGTATTTAGGCCTACTCTAGGTGCGGTACTTCACTATAGTTTATAAAAGATGGTCCCT	natural antisense
ASHGA5P058359	0.0372756	1.89894	65.421	34.4513	5.88066	5.06332	32.6802	63.2287	22.9475	30.9048	22.4954	34.4513	72.5004	78.7351	55.0923	48.3005	72.4768	65.421	5.85597	4.61224	6.087	5.70974	5.91406	4.86019	5.49695	5.48419	6.04932	4.65024	P	P	P	M	P	P	P	P	P	P	noncoding	uc001vdo.1	DLEU2	UCSC_knowngene	3068	chr13	-	50556687	50699677	TAAGTATTTAGGCCTACTCTAGGTGCGGTACTTCACTATAGTTTATAAAAGATGGTCCCT	natural antisense
ASHGA5P043867	0.0139066	1.89327	70.4761	37.2245	5.96022	5.23615	42.0102	54.5672	32.6731	23.6887	33.1834	37.2245	77.377	74.0671	45.9339	58.948	96.0544	70.4761	5.94505	5.03909	6.00707	5.50732	5.65249	5.42835	5.7565	5.00558	6.44001	5.20042	P	P	P	M	P	P	P	P	P	P	noncoding	TCONS_00018595	XLOC_008935	LincRNAs identified by Cabili et al	472	chr10	-	105725460	105726749	CGGTATCTGGAGCAGAGACAATGTATGTATATATTGCTATTTATATAATGTCTGCCCCCC	intergenic
ASHGA5P041202	0.0260328	1.88583	74.3469	39.424	6.05191	5.39868	35.1734	46.683	41.0481	38.3543	35.8614	39.424	87.7248	55.8446	66.1043	99.1932	62.8674	74.3469	6.12611	4.73907	5.64001	5.29262	6.17158	5.77995	6.47275	5.86849	5.8491	5.31329	P	P	P	P	P	P	P	P	P	P	noncoding	ENST00000389897	RP11-98D18.9	GENCODE	992	chr1	+	151763317	151766878	TTTCTGGAAAACATGAAATAGGCTTTGTAGATGGACAGGAAGTCAAGGGACAAGCGGTGC	natural antisense
ASHGA5P018392	0.0111224	1.88525	95.9748	50.9082	6.37132	5.69257	50.0659	77.1079	60.7346	30.5159	36.1168	50.9082	62.4646	96.8366	139.588	109.733	71.2514	95.9748	5.65321	5.32936	6.36997	5.98921	7.19712	6.35576	6.61215	5.46364	6.02413	5.3249	P	P	P	P	P	P	P	P	P	P	noncoding	uc001dqu.3	BC030750	UCSC_knowngene	1328	chr1	-	95123088	95285834	TAGCAAACAGGTGAATTCCTTGGAAGATGAGGGCCAAGTCTTATTCTTCTCAGTCTCTTC	bidirectional
ASHGA5P018392	0.0111224	1.88525	95.9748	50.9082	6.37132	5.69257	50.0659	77.1079	60.7346	30.5159	36.1168	50.9082	62.4646	96.8366	139.588	109.733	71.2514	95.9748	5.65321	5.32936	6.36997	5.98921	7.19712	6.35576	6.61215	5.46364	6.02413	5.3249	P	P	P	P	P	P	P	P	P	P	noncoding	uc001dqu.3	BC030750	UCSC_knowngene	1328	chr1	-	95123088	95285834	TAGCAAACAGGTGAATTCCTTGGAAGATGAGGGCCAAGTCTTATTCTTCTCAGTCTCTTC	bidirectional
ASHGA5P018392	0.0111224	1.88525	95.9748	50.9082	6.37132	5.69257	50.0659	77.1079	60.7346	30.5159	36.1168	50.9082	62.4646	96.8366	139.588	109.733	71.2514	95.9748	5.65321	5.32936	6.36997	5.98921	7.19712	6.35576	6.61215	5.46364	6.02413	5.3249	P	P	P	P	P	P	P	P	P	P	noncoding	uc001dqu.3	BC030750	UCSC_knowngene	1328	chr1	-	95123088	95285834	TAGCAAACAGGTGAATTCCTTGGAAGATGAGGGCCAAGTCTTATTCTTCTCAGTCTCTTC	bidirectional
ASHGA5P018392	0.0111224	1.88525	95.9748	50.9082	6.37132	5.69257	50.0659	77.1079	60.7346	30.5159	36.1168	50.9082	62.4646	96.8366	139.588	109.733	71.2514	95.9748	5.65321	5.32936	6.36997	5.98921	7.19712	6.35576	6.61215	5.46364	6.02413	5.3249	P	P	P	P	P	P	P	P	P	P	noncoding	uc001dqu.3	BC030750	UCSC_knowngene	1328	chr1	-	95123088	95285834	TAGCAAACAGGTGAATTCCTTGGAAGATGAGGGCCAAGTCTTATTCTTCTCAGTCTCTTC	bidirectional
ASHGA5P018392	0.0111224	1.88525	95.9748	50.9082	6.37132	5.69257	50.0659	77.1079	60.7346	30.5159	36.1168	50.9082	62.4646	96.8366	139.588	109.733	71.2514	95.9748	5.65321	5.32936	6.36997	5.98921	7.19712	6.35576	6.61215	5.46364	6.02413	5.3249	P	P	P	P	P	P	P	P	P	P	noncoding	uc001dqu.3	BC030750	UCSC_knowngene	1328	chr1	-	95123088	95285834	TAGCAAACAGGTGAATTCCTTGGAAGATGAGGGCCAAGTCTTATTCTTCTCAGTCTCTTC	bidirectional
ASHGA5P018392	0.0111224	1.88525	95.9748	50.9082	6.37132	5.69257	50.0659	77.1079	60.7346	30.5159	36.1168	50.9082	62.4646	96.8366	139.588	109.733	71.2514	95.9748	5.65321	5.32936	6.36997	5.98921	7.19712	6.35576	6.61215	5.46364	6.02413	5.3249	P	P	P	P	P	P	P	P	P	P	noncoding	uc001dqu.3	BC030750	UCSC_knowngene	1328	chr1	-	95123088	95285834	TAGCAAACAGGTGAATTCCTTGGAAGATGAGGGCCAAGTCTTATTCTTCTCAGTCTCTTC	bidirectional
ASHGA5P031908	0.0186882	1.87514	375.125	200.051	8.27834	7.77639	224.06	313.086	158.906	152.727	151.476	200.051	398.86	507.227	203.53	430.272	335.734	375.125	8.28823	7.68984	8.65998	7.96176	7.7353	7.71958	8.4989	8.04397	8.20927	7.46679	P	P	P	P	P	P	P	P	P	P	noncoding	ENST00000569195	RP5-991G20.4	GENCODE	2381	chr16	+	72823141	72825522	GTCAGAACTTGAGTAGCACTAAACATATACCTGTTGACTGACTGGCTCATATTGGGTGTT	intronic antisense
ASHGA5P031908	0.0186882	1.87514	375.125	200.051	8.27834	7.77639	224.06	313.086	158.906	152.727	151.476	200.051	398.86	507.227	203.53	430.272	335.734	375.125	8.28823	7.68984	8.65998	7.96176	7.7353	7.71958	8.4989	8.04397	8.20927	7.46679	P	P	P	P	P	P	P	P	P	P	noncoding	ENST00000569195	RP5-991G20.4	GENCODE	2381	chr16	+	72823141	72825522	GTCAGAACTTGAGTAGCACTAAACATATACCTGTTGACTGACTGGCTCATATTGGGTGTT	intronic antisense
ASHGA5P026017	0.0462366	1.87005	7427.78	3971.97	12.5873	12.1321	4898.99	5840	3778.89	2506.84	2835.13	3971.97	7247.37	7951.08	5605.43	7915.81	8419.21	7427.78	12.4143	12.279	12.6793	12.2442	12.3721	12.1968	12.6429	12.1381	12.828	11.8023	P	P	P	P	P	P	P	P	P	P	noncoding	NR_073029	TIMM23	RefSeq	1363	chr10	-	51592080	51623386	AATCTTCAAGGTGGTCTTCGAGGGATAGCACGAGGTGGTCTGACAGGACTAACACTTACC	exon sense-overlapping
ASHGA5P016657	0.0407241	1.86759	90.4387	48.4253	6.28371	5.71957	46.6336	47.3769	45.6598	46.9635	55.4925	48.4253	70.7248	103.856	54.0451	128.002	95.5655	90.4387	5.82104	5.21206	6.457	5.31222	5.8856	5.9297	6.82158	6.20563	6.43332	5.93824	P	P	P	P	P	P	P	P	P	P	noncoding	uc002yjk.3	BC048201	UCSC_knowngene	1073	chr21	+	15399741	15516778	GAGAGAGGAGGGTGTTGTCAATGGAAATATGGATTCTTCTACAGCAAACATGTACATCTA	intronic antisense
ASHGA5P020735	0.0277829	1.86726	2165.49	1159.71	10.6028	10.1747	2083.72	1787.46	431.357	567.016	929.024	1159.71	3872.15	2327.44	543.657	2020.96	2063.24	2165.49	11.5721	11.0391	10.8543	10.5008	9.10789	9.13583	10.6804	9.98626	10.7991	10.2116	P	P	P	P	P	P	P	P	P	P	noncoding	uc003ajh.3	TUG1	UCSC_knowngene	7090	chr22	+	31365633	31375380	ATACATCAAGCATTTTGTGACCGACTTATTCTTAGATCATTGGTTTTCCAAAGGCTTTGT	intergenic
ASHGA5P003749	0.0471894	1.86275	875.594	470.055	9.49521	9.08295	482.988	604.961	469.84	394.941	397.546	470.055	769.433	662.455	1208.42	1071.15	666.518	875.594	9.24912	8.85214	9.05213	8.90611	10.2273	9.25897	9.7788	9.45166	9.1687	8.94587	P	P	P	P	P	P	P	P	P	P	noncoding	ENST00000414507	PMS2P4	GENCODE	455	chr7	-	66760604	66767406	AAGAAGAAAACTTTGAAGGCTTAACGATGTCACCATTTCTACCTGCCACGCATCGGCGAA	intergenic
ASHGA5P013717	0.0482225	1.85894	88.2526	47.4746	6.19059	5.35651	30.6127	115.903	32.5942	25.1583	33.1046	47.4746	70.2262	127.305	47.2995	60.8243	135.608	88.2526	5.81123	4.49676	6.73648	6.55589	5.69833	5.42396	5.79948	5.10895	6.90742	5.19699	P	P	M	P	P	P	P	P	P	P	noncoding	NR_047554	UBE2V1	RefSeq	2009	chr20	-	48697660	48729735	GCAGCCACCACGGGCTCGGACAATTTATGAAAACCGAATATACAGCCTTAAAATAGAATG	exon sense-overlapping
ASHGA5P013717	0.0482225	1.85894	88.2526	47.4746	6.19059	5.35651	30.6127	115.903	32.5942	25.1583	33.1046	47.4746	70.2262	127.305	47.2995	60.8243	135.608	88.2526	5.81123	4.49676	6.73648	6.55589	5.69833	5.42396	5.79948	5.10895	6.90742	5.19699	P	P	M	P	P	P	P	P	P	P	noncoding	NR_047554	UBE2V1	RefSeq	2009	chr20	-	48697660	48729735	GCAGCCACCACGGGCTCGGACAATTTATGAAAACCGAATATACAGCCTTAAAATAGAATG	exon sense-overlapping
ASHGA5P013717	0.0482225	1.85894	88.2526	47.4746	6.19059	5.35651	30.6127	115.903	32.5942	25.1583	33.1046	47.4746	70.2262	127.305	47.2995	60.8243	135.608	88.2526	5.81123	4.49676	6.73648	6.55589	5.69833	5.42396	5.79948	5.10895	6.90742	5.19699	P	P	M	P	P	P	P	P	P	P	noncoding	NR_047554	UBE2V1	RefSeq	2009	chr20	-	48697660	48729735	GCAGCCACCACGGGCTCGGACAATTTATGAAAACCGAATATACAGCCTTAAAATAGAATG	exon sense-overlapping
ASHGA5P013717	0.0482225	1.85894	88.2526	47.4746	6.19059	5.35651	30.6127	115.903	32.5942	25.1583	33.1046	47.4746	70.2262	127.305	47.2995	60.8243	135.608	88.2526	5.81123	4.49676	6.73648	6.55589	5.69833	5.42396	5.79948	5.10895	6.90742	5.19699	P	P	M	P	P	P	P	P	P	P	noncoding	NR_047554	UBE2V1	RefSeq	2009	chr20	-	48697660	48729735	GCAGCCACCACGGGCTCGGACAATTTATGAAAACCGAATATACAGCCTTAAAATAGAATG	exon sense-overlapping
ASHGA5P013717	0.0482225	1.85894	88.2526	47.4746	6.19059	5.35651	30.6127	115.903	32.5942	25.1583	33.1046	47.4746	70.2262	127.305	47.2995	60.8243	135.608	88.2526	5.81123	4.49676	6.73648	6.55589	5.69833	5.42396	5.79948	5.10895	6.90742	5.19699	P	P	M	P	P	P	P	P	P	P	noncoding	NR_047554	UBE2V1	RefSeq	2009	chr20	-	48697660	48729735	GCAGCCACCACGGGCTCGGACAATTTATGAAAACCGAATATACAGCCTTAAAATAGAATG	exon sense-overlapping
ASHGA5P013717	0.0482225	1.85894	88.2526	47.4746	6.19059	5.35651	30.6127	115.903	32.5942	25.1583	33.1046	47.4746	70.2262	127.305	47.2995	60.8243	135.608	88.2526	5.81123	4.49676	6.73648	6.55589	5.69833	5.42396	5.79948	5.10895	6.90742	5.19699	P	P	M	P	P	P	P	P	P	P	noncoding	NR_047554	UBE2V1	RefSeq	2009	chr20	-	48697660	48729735	GCAGCCACCACGGGCTCGGACAATTTATGAAAACCGAATATACAGCCTTAAAATAGAATG	exon sense-overlapping
ASHGA5P013717	0.0482225	1.85894	88.2526	47.4746	6.19059	5.35651	30.6127	115.903	32.5942	25.1583	33.1046	47.4746	70.2262	127.305	47.2995	60.8243	135.608	88.2526	5.81123	4.49676	6.73648	6.55589	5.69833	5.42396	5.79948	5.10895	6.90742	5.19699	P	P	M	P	P	P	P	P	P	P	noncoding	NR_047554	UBE2V1	RefSeq	2009	chr20	-	48697660	48729735	GCAGCCACCACGGGCTCGGACAATTTATGAAAACCGAATATACAGCCTTAAAATAGAATG	exon sense-overlapping
ASHGA5P013717	0.0482225	1.85894	88.2526	47.4746	6.19059	5.35651	30.6127	115.903	32.5942	25.1583	33.1046	47.4746	70.2262	127.305	47.2995	60.8243	135.608	88.2526	5.81123	4.49676	6.73648	6.55589	5.69833	5.42396	5.79948	5.10895	6.90742	5.19699	P	P	M	P	P	P	P	P	P	P	noncoding	NR_047554	UBE2V1	RefSeq	2009	chr20	-	48697660	48729735	GCAGCCACCACGGGCTCGGACAATTTATGAAAACCGAATATACAGCCTTAAAATAGAATG	exon sense-overlapping
ASHGA5P013717	0.0482225	1.85894	88.2526	47.4746	6.19059	5.35651	30.6127	115.903	32.5942	25.1583	33.1046	47.4746	70.2262	127.305	47.2995	60.8243	135.608	88.2526	5.81123	4.49676	6.73648	6.55589	5.69833	5.42396	5.79948	5.10895	6.90742	5.19699	P	P	M	P	P	P	P	P	P	P	noncoding	NR_047554	UBE2V1	RefSeq	2009	chr20	-	48697660	48729735	GCAGCCACCACGGGCTCGGACAATTTATGAAAACCGAATATACAGCCTTAAAATAGAATG	exon sense-overlapping
ASHGA5P013717	0.0482225	1.85894	88.2526	47.4746	6.19059	5.35651	30.6127	115.903	32.5942	25.1583	33.1046	47.4746	70.2262	127.305	47.2995	60.8243	135.608	88.2526	5.81123	4.49676	6.73648	6.55589	5.69833	5.42396	5.79948	5.10895	6.90742	5.19699	P	P	M	P	P	P	P	P	P	P	noncoding	NR_047554	UBE2V1	RefSeq	2009	chr20	-	48697660	48729735	GCAGCCACCACGGGCTCGGACAATTTATGAAAACCGAATATACAGCCTTAAAATAGAATG	exon sense-overlapping
ASHGA5P013717	0.0482225	1.85894	88.2526	47.4746	6.19059	5.35651	30.6127	115.903	32.5942	25.1583	33.1046	47.4746	70.2262	127.305	47.2995	60.8243	135.608	88.2526	5.81123	4.49676	6.73648	6.55589	5.69833	5.42396	5.79948	5.10895	6.90742	5.19699	P	P	M	P	P	P	P	P	P	P	noncoding	NR_047554	UBE2V1	RefSeq	2009	chr20	-	48697660	48729735	GCAGCCACCACGGGCTCGGACAATTTATGAAAACCGAATATACAGCCTTAAAATAGAATG	exon sense-overlapping
ASHGA5P013717	0.0482225	1.85894	88.2526	47.4746	6.19059	5.35651	30.6127	115.903	32.5942	25.1583	33.1046	47.4746	70.2262	127.305	47.2995	60.8243	135.608	88.2526	5.81123	4.49676	6.73648	6.55589	5.69833	5.42396	5.79948	5.10895	6.90742	5.19699	P	P	M	P	P	P	P	P	P	P	noncoding	NR_047554	UBE2V1	RefSeq	2009	chr20	-	48697660	48729735	GCAGCCACCACGGGCTCGGACAATTTATGAAAACCGAATATACAGCCTTAAAATAGAATG	exon sense-overlapping
ASHGA5P058601	0.0373561	1.85251	186.318	100.576	7.25935	6.73811	125.059	143.283	102.013	65.8624	66.6638	100.576	304.628	163.418	202.885	167.313	93.3453	186.318	7.90836	6.78641	7.08326	6.84505	7.73041	7.09179	7.17524	6.75365	6.39947	6.21366	P	P	P	P	P	P	P	P	P	P	noncoding	uc010sdh.2	LOC100288778	UCSC_knowngene	1376	chr12	+	88256	91263	TTTTGAGCTTGTACCCAGCGCTGCTTTTGCCTTGCTCTGTGACCCCAGTGAGAGCCACGA	intergenic
ASHGA5P037188	0.0270797	1.85113	309.931	167.428	8.02813	7.48113	115.106	292.83	150.562	133.644	144.997	167.428	233.43	452.154	261.146	270.58	332.346	309.931	7.54379	6.65406	8.48717	7.85918	8.08387	7.6412	7.8328	7.8513	8.19302	7.39992	P	P	P	P	P	P	P	P	P	P	noncoding	ENST00000416067	MAFIPL	GENCODE	1599	chr21	-	9907193	9968585	TGGTAGGATCCTTTCATGGCGTCTTCCCAGGACCTCCTGCCAGCTCCCATTGGGAGTTTT	intergenic
ASHGA5P021049	0.000170107	1.83593	244.292	133.062	7.71001	7.16564	122.432	206.499	137.506	91.4963	107.375	133.062	180.372	297.27	251.928	271.725	220.164	244.292	7.17261	6.75156	7.90015	7.37332	8.03776	7.51448	7.83995	7.25365	7.59958	6.93518	P	P	P	P	P	P	P	P	P	P	noncoding	ENST00000523992	RP11-556O5.3	pseudogene	854	chr8	+	8086126	8094763	TTGCAGAATGGGCCATCGAGAACCCGGCAGCCTTCACTCACTCTGTCTTAGAGCTTGGCA
ASHGA5P019193	0.0313701	1.83235	480.943	262.473	8.54287	8.00906	388.896	265.401	168.556	77.3231	412.191	262.473	506.687	327.995	460.527	216.775	892.728	480.943	8.63855	8.52281	8.04591	7.72589	8.88807	7.79493	7.53319	7.00513	9.60865	8.99653	P	P	P	P	P	P	P	P	P	P	noncoding	NR_027169	C17orf76-AS1	RefSeq	1068	chr17	+	16342300	16345340	AGAGAACTGGGAAGTGCCGTCAGAAGCGATAACTGACGACGTCTAATGTCTATCTGACCG	natural antisense
ASHGA5P019193	0.0313701	1.83235	480.943	262.473	8.54287	8.00906	388.896	265.401	168.556	77.3231	412.191	262.473	506.687	327.995	460.527	216.775	892.728	480.943	8.63855	8.52281	8.04591	7.72589	8.88807	7.79493	7.53319	7.00513	9.60865	8.99653	P	P	P	P	P	P	P	P	P	P	noncoding	NR_027169	C17orf76-AS1	RefSeq	1068	chr17	+	16342300	16345340	AGAGAACTGGGAAGTGCCGTCAGAAGCGATAACTGACGACGTCTAATGTCTATCTGACCG	natural antisense
ASHGA5P032041	0.0195072	1.82247	86.0072	47.1926	6.19863	5.5931	36.1878	77.8451	48.2231	41.2038	32.5029	47.1926	76.3885	128.106	86.7722	94.0342	44.7351	86.0072	5.92684	4.78606	6.74618	6.00226	6.55241	6.01724	6.3977	5.98941	5.37001	5.17054	P	P	P	P	P	P	P	P	P	P	noncoding	TCONS_00029845	XLOC_014288	LincRNAs identified by Cabili et al	430	chr22	+	51024086	51025883	TACCAACATGGGATCACGAATCACATCGCCTCAGGCCAAGAAAGCCATTTTATAGCGAAA	intergenic
ASHGA5P050798	0.0347291	1.81542	67.3642	37.1067	5.89607	5.29726	45.9988	39.5066	36.3324	28.9108	34.785	37.1067	50.47	73.9182	97.7496	66.7317	47.9517	67.3642	5.37159	5.19085	6.00501	5.06109	6.71739	5.6019	5.92312	5.36398	5.46322	5.2685	P	P	P	P	P	P	P	P	P	P	noncoding	ENST00000424711	RP11-86H7.1	GENCODE	532	chr1	-	95197688	95208051	GTATTTGCATCCTTCCCTGCTTCAGCCAGGTAAGATCTACTAGCTCAAACTTATCACAGC	intergenic
ASHGA5P019690	0.0194088	1.81329	152.421	84.0575	7.04385	6.48358	130.556	78.2133	95.6882	59.112	56.7174	84.0575	184.722	112.099	133.871	194.258	137.155	152.421	7.206	6.85768	6.56411	6.00908	7.1378	7.00092	7.38614	6.57497	6.92517	5.97525	P	M	P	P	P	P	P	P	P	P	noncoding	uc009yby.2	MIR210HG	UCSC_knowngene	2002	chr11	-	565659	568457	GGGGTCGCAGGCCTGCAGGAGTTGAGGGCTGCACCTGCTCGCTGGAGAGGGAGAGGCAGA	intergenic
ASHGA5P016617	0.00554507	1.80101	47.9992	26.6513	5.47966	4.76591	24.2041	30.4563	31.1606	22.5763	24.8591	26.6513	47.6948	45.6784	53.5333	45.0754	48.0141	47.9992	5.2866	4.0728	5.37285	4.69211	5.87285	5.35362	5.40092	4.91897	5.4651	4.79203	P	P	P	P	P	P	P	P	P	P	noncoding	ENST00000432246	RP11-251A15.4	GENCODE	609	chr10	-	93542692	93557953	TCTTTCCACAGGAATTGAACAGCTTGGACTTGGAGACAGTGAGTTAAAACAGAAATAAGA	bidirectional
ASHGA5P025882	0.0438786	1.78349	2015.73	1130.21	10.7036	10.3221	1135.16	1713.06	1175.56	694.515	932.768	1130.21	1708.35	2250.12	1498.27	2529.33	2092.56	2015.73	10.3738	10.1654	10.8017	10.4315	10.5352	10.5359	10.9886	10.2604	10.819	10.2171	P	P	P	P	P	P	P	P	P	P	noncoding	NR_045585	SDF2	RefSeq	1262	chr17	-	26975373	26989207	CGAGAGTATCGTAGTGGGCAGCAGTCAGTGACAGGTGTAACCTCTGTGGATGACAGCAAC	exon sense-overlapping
ASHGA5P027314	0.0391947	1.7778	83.381	46.9012	6.19122	5.65813	44.1626	60.2611	41.8584	48.3924	39.8314	46.9012	100.04	73.8264	76.3324	113.689	53.0169	83.381	6.30765	5.1251	6.00283	5.64481	6.37925	5.80557	6.6657	6.25441	5.60067	5.46076	P	P	P	P	P	P	P	P	P	P	noncoding	ENST00000550263	RP11-680A11.5	GENCODE	637	chr12	-	53692448	53694098	TAAATAAATGGTATCTGAGAACCTACCTCTGGTGATGGTCATATCGGTGTCTCCGAGGGT	intronic antisense
ASHGA5P027314	0.0391947	1.7778	83.381	46.9012	6.19122	5.65813	44.1626	60.2611	41.8584	48.3924	39.8314	46.9012	100.04	73.8264	76.3324	113.689	53.0169	83.381	6.30765	5.1251	6.00283	5.64481	6.37925	5.80557	6.6657	6.25441	5.60067	5.46076	P	P	P	P	P	P	P	P	P	P	noncoding	ENST00000550263	RP11-680A11.5	GENCODE	637	chr12	-	53692448	53694098	TAAATAAATGGTATCTGAGAACCTACCTCTGGTGATGGTCATATCGGTGTCTCCGAGGGT	intronic antisense
ASHGA5P027314	0.0391947	1.7778	83.381	46.9012	6.19122	5.65813	44.1626	60.2611	41.8584	48.3924	39.8314	46.9012	100.04	73.8264	76.3324	113.689	53.0169	83.381	6.30765	5.1251	6.00283	5.64481	6.37925	5.80557	6.6657	6.25441	5.60067	5.46076	P	P	P	P	P	P	P	P	P	P	noncoding	ENST00000550263	RP11-680A11.5	GENCODE	637	chr12	-	53692448	53694098	TAAATAAATGGTATCTGAGAACCTACCTCTGGTGATGGTCATATCGGTGTCTCCGAGGGT	natural antisense
ASHGA5P048826	0.00927308	1.76947	147.697	83.4698	7.01989	6.51834	102.114	98.6901	70.3225	66.2221	80.0007	83.4699	151.734	159.108	154.676	153.258	119.709	147.697	6.92191	6.46296	7.051	6.3227	7.3289	6.56029	7.05828	6.76118	6.73936	6.48459	P	P	P	M	P	M	P	M	M	P	noncoding	NR_037653	ST20	RefSeq	681	chr15	-	80191181	80216096	GCGGAGGGACGGAGGGAAGATGGCTGCAGAGACCGGATATTGGCGCTGCCTCCCCGAATC	exon sense-overlapping
ASHGA5P048826	0.00927308	1.76947	147.697	83.4698	7.01989	6.51834	102.114	98.6901	70.3225	66.2221	80.0007	83.4699	151.734	159.108	154.676	153.258	119.709	147.697	6.92191	6.46296	7.051	6.3227	7.3289	6.56029	7.05828	6.76118	6.73936	6.48459	P	P	P	M	P	M	P	M	M	P	noncoding	NR_037653	ST20	RefSeq	681	chr15	-	80191181	80216096	GCGGAGGGACGGAGGGAAGATGGCTGCAGAGACCGGATATTGGCGCTGCCTCCCCGAATC	exon sense-overlapping
ASHGA5P048826	0.00927308	1.76947	147.697	83.4698	7.01989	6.51834	102.114	98.6901	70.3225	66.2221	80.0007	83.4699	151.734	159.108	154.676	153.258	119.709	147.697	6.92191	6.46296	7.051	6.3227	7.3289	6.56029	7.05828	6.76118	6.73936	6.48459	P	P	P	M	P	M	P	M	M	P	noncoding	NR_037653	ST20	RefSeq	681	chr15	-	80191181	80216096	GCGGAGGGACGGAGGGAAGATGGCTGCAGAGACCGGATATTGGCGCTGCCTCCCCGAATC	exon sense-overlapping
ASHGA5P048826	0.00927308	1.76947	147.697	83.4698	7.01989	6.51834	102.114	98.6901	70.3225	66.2221	80.0007	83.4699	151.734	159.108	154.676	153.258	119.709	147.697	6.92191	6.46296	7.051	6.3227	7.3289	6.56029	7.05828	6.76118	6.73936	6.48459	P	P	P	M	P	M	P	M	M	P	noncoding	NR_037653	ST20	RefSeq	681	chr15	-	80191181	80216096	GCGGAGGGACGGAGGGAAGATGGCTGCAGAGACCGGATATTGGCGCTGCCTCCCCGAATC	exon sense-overlapping
ASHGA5P033486	0.0468977	1.75529	97.0993	55.3181	6.41888	5.90858	63.2497	65.7516	42.6048	50.9943	53.9902	55.3181	144.589	75.5649	81.5329	98.6971	85.1127	97.0993	6.85726	5.71026	6.03127	5.76959	6.46908	5.83254	6.4645	6.33508	6.27227	5.89541	P	P	P	P	P	P	P	P	P	P	noncoding	TCONS_00027922	XLOC_013506	LincRNAs identified by Cabili et al	4986	chr20	+	30940477	30945985	AAGCAGCTCAGGTTATCCTTCCTTTGAGGCCATTCTAGGGGGTCCCACAAATCTTTTTAA	intergenic
ASHGA5P018138	0.0204044	1.75516	147.098	83.8093	6.95577	6.39269	64.9045	165.479	63.6306	54.7639	70.2682	83.8093	112.587	196.175	85.5904	186.114	155.025	147.098	6.482	5.74974	7.33157	7.04621	6.53404	6.41534	7.3226	6.45864	7.10863	6.29355	P	P	P	M	P	P	P	M	P	P	noncoding	ENST00000449852	RP11-126H7.3	GENCODE	487	chr10	+	79687129	79689582	GAAAAGAAAGAATAGGGAAATTTGGATGCAGAGACACAGAGAAAATGCCATGTGAAGATG	bidirectional
ASHGA5P019333	0.015163	1.75152	697.18	398.042	9.21865	8.74556	400.91	702.292	347.784	260.126	279.1	398.042	709.564	766.148	727.677	649.855	632.657	697.18	9.13273	8.56967	9.25372	9.11231	9.52362	8.81734	9.07995	8.82291	9.10323	8.40555	P	P	P	P	P	P	P	P	P	P	noncoding	ENST00000478666	FAM86DP	GENCODE	1068	chr3	-	75471569	75484197	TCATCAAAAAGACGTGCTGTATTGCCCAGAAGCCATCGTGTCGCTGGTCGGGATCCTGCG	intergenic
ASHGA5P019367	0.00134623	1.75091	100.132	57.1884	6.47506	5.92237	67.3893	80.9408	50.0999	40.9551	46.5569	57.1884	108.845	106.773	81.9332	122.24	80.8663	100.132	6.43314	5.81238	6.49966	6.0545	6.47633	6.0776	6.76457	5.97787	6.20162	5.68951	P	P	P	P	P	P	P	P	M	P	noncoding	NR_045720	MAN1B1	RefSeq	2762	chr9	+	139981378	140003639	TGCCAAGATGGGACGCTGGCTCTGGGCGTCTACCACGGCCTGCCCGCCAGCCACATGGAG	exon sense-overlapping
ASHGA5P021515	0.048511	1.74969	146.253	83.5879	6.98608	6.46714	136.669	69.989	95.0455	63.0248	53.2108	83.5879	169.924	130.132	119.458	197.219	114.534	146.253	7.08768	6.92931	6.76579	5.86089	6.98456	6.99113	7.40829	6.68304	6.68408	5.87135	P	P	M	P	P	P	P	P	P	P	noncoding	NR_038262	MIR210HG	RefSeq	2303	chr11	-	565656	568457	GGGGTCGCAGGGTACCAGTGTGCGGAGTTCCTGTTGCCAAGCTGAAGGTGGCCCTGGGCA	intergenic
ASHGA5P019225	0.00627426	1.7428	637.201	365.618	9.07933	8.62423	438.059	577.029	334.303	197.53	281.17	365.618	735.615	678.448	663.996	644.429	463.517	637.201	9.18405	8.70187	9.08242	8.82559	9.39395	8.75793	9.06713	8.4205	8.66909	8.41528	P	P	P	P	P	P	P	P	P	M	noncoding	NR_027762	RBM34	RefSeq	1733	chr1	-	235294497	235324571	TGTGCCTAAAGGAAAGCGCTCTAGCGAGTGCTGATTTAGAAGAAGAAATTCACCAGAAAC	exon sense-overlapping
ASHGA5P019225	0.00627426	1.7428	637.201	365.618	9.07933	8.62423	438.059	577.029	334.303	197.53	281.17	365.618	735.615	678.448	663.996	644.429	463.517	637.201	9.18405	8.70187	9.08242	8.82559	9.39395	8.75793	9.06713	8.4205	8.66909	8.41528	P	P	P	P	P	P	P	P	P	M	noncoding	NR_027762	RBM34	RefSeq	1733	chr1	-	235294497	235324571	TGTGCCTAAAGGAAAGCGCTCTAGCGAGTGCTGATTTAGAAGAAGAAATTCACCAGAAAC	exon sense-overlapping
ASHGA5P049523	0.0267818	1.72571	56951.3	33001.7	15.6136	15.1995	36150.9	37362.6	28254.9	22454	40786	33001.7	60664	51455.3	56692.3	44602	71343	56951.3	15.6327	15.2301	15.5425	15.0361	15.6943	14.9997	15.169	15.2007	16.0297	15.531	P	P	P	P	P	P	P	P	P	P	noncoding	NR_027160	C17orf76-AS1	RefSeq	1338	chr17	+	16342300	16345340	GCCATCATGCCCAACAAGAGGTTCTATACCTTTTAATGAATTGACTTTCATAAATTGGTT	natural antisense
ASHGA5P049523	0.0267818	1.72571	56951.3	33001.7	15.6136	15.1995	36150.9	37362.6	28254.9	22454	40786	33001.7	60664	51455.3	56692.3	44602	71343	56951.3	15.6327	15.2301	15.5425	15.0361	15.6943	14.9997	15.169	15.2007	16.0297	15.531	P	P	P	P	P	P	P	P	P	P	noncoding	NR_027160	C17orf76-AS1	RefSeq	1338	chr17	+	16342300	16345340	GCCATCATGCCCAACAAGAGGTTCTATACCTTTTAATGAATTGACTTTCATAAATTGGTT	natural antisense
ASHGA5P017268	0.0498581	1.72148	150.096	87.1903	7.02523	6.56194	90.5705	118.415	82.9563	59.2311	84.7783	87.1903	155.106	123.744	206.568	151.09	113.974	150.096	6.95356	6.26968	6.69967	6.58832	7.75862	6.79424	7.0371	6.58012	6.6772	6.57736	P	P	P	P	P	P	P	P	P	M	noncoding	ENST00000439498	RP4-694B14.5	GENCODE	964	chr20	+	25604694	25658184	TTTACTCCTGCCAGGCAGCTGTGTCACTCTGGAAGCTTTGATCAGAAAATTGTAGTTGCT	natural antisense
ASHGA5P017779	0.0121928	1.70439	80.4171	47.1823	6.13584	5.63499	49.8735	67.0486	40.1045	34.9251	43.9596	47.1823	58.1573	121.518	60.0514	80.8534	81.5059	80.4171	5.56237	5.32282	6.67267	5.79601	6.03922	5.7475	6.19037	5.70495	6.21459	5.60366	P	P	M	P	P	P	P	P	P	P	noncoding	NR_033464	NT5C3L	RefSeq	1498	chr17	-	39981333	39992488	CTTCACCCAGGTGAGCACCCTGATGAAGGCCACGGTCCTGATGCGGCAGCCTGGGCGGGT	exon sense-overlapping
ASHGA5P019295	0.00761184	1.69943	244.15	143.666	7.72195	7.23937	190.931	219.306	108.401	73.7976	125.894	143.666	243.643	288.258	203.319	212.896	272.634	244.15	7.6036	7.45296	7.85874	7.45547	7.73318	7.17362	7.51018	6.93025	7.90407	7.18456	P	P	P	P	P	P	P	P	P	P	noncoding	ENST00000477247	FAM86DP	pseudogene	986	chr3	-	75472111	75484261	CCTTCCCCTGAGCTTAGAAGCAAAGTTAAGAGACTCATCAGATTCTGAGCTGCTGCGGGA
ASHGA5P044557	0.0373919	1.69499	1903.15	1122.81	10.6069	10.2782	1826.67	1364.58	971.481	634.385	816.944	1122.81	2586.96	2173.77	1312.92	1877.18	1564.92	1903.15	10.9795	10.8458	10.7511	10.0964	10.3464	10.2868	10.5804	10.1409	10.3773	10.0211	P	P	P	P	P	P	M	P	P	P	noncoding	uc003yvm.3	DQ574852	UCSC_knowngene	4833	chr8	-	141531042	141535875	TTGGGGCAGGTGATTAAATTTATATAGGTACCTCAAGAAAAAGAACCTGAATATGCTGCA	intergenic
ASHGA5P010331	0.0301495	1.692	67.4819	39.8828	5.90834	5.39429	58.0497	41.4675	28.9648	37.0846	33.8474	39.8828	76.0281	84.9245	44.8026	68.3628	63.2914	67.4819	5.91879	5.56831	6.18961	5.12948	5.61909	5.23573	5.95732	5.80775	5.85691	5.23015	P	P	P	P	P	P	P	P	P	P	noncoding	ENST00000476537	PI4KAP2	GENCODE	276	chr22	-	21846264	21871770	CGCACACGAGGTGACCAGGCATTGATGCACCCCCAGGAAGGCCACGCGCTCAGGAGGCCC	intergenic
ASHGA5P027664	0.00537444	1.66604	433.197	260.016	8.54	8.18515	294.764	343.44	239.906	158.123	263.848	260.016	449.556	392.349	365.542	484.946	473.591	433.197	8.46921	8.11522	8.29199	8.09619	8.56592	8.3006	8.67566	8.09803	8.69719	8.31569	M	P	P	P	P	P	P	P	P	P	noncoding	ENST00000538837	RP11-338K17.8	GENCODE	321	chr12	-	124192148	124192933	GCATACAAGACTACAACAAATCACTGAAGTCAAGGTCTAAAGTCTTTGAGAAGTCAGATG	natural antisense
ASHGA5P027664	0.00537444	1.66604	433.197	260.016	8.54	8.18515	294.764	343.44	239.906	158.123	263.848	260.016	449.556	392.349	365.542	484.946	473.591	433.197	8.46921	8.11522	8.29199	8.09619	8.56592	8.3006	8.67566	8.09803	8.69719	8.31569	M	P	P	P	P	P	P	P	P	P	noncoding	ENST00000538837	RP11-338K17.8	GENCODE	321	chr12	-	124192148	124192933	GCATACAAGACTACAACAAATCACTGAAGTCAAGGTCTAAAGTCTTTGAGAAGTCAGATG	natural antisense
ASHGA5P045715	0.0166374	1.66202	107.405	64.6231	6.50342	6.0427	56.5441	69.5592	111.431	46.5711	39.0104	64.6231	88.1898	70.6287	186.933	109.152	82.1212	107.405	6.13422	5.52832	5.94936	5.85184	7.6064	7.21079	6.60418	6.19296	6.22292	5.42959	P	P	P	P	P	P	P	P	P	P	noncoding	ENST00000512404	RP11-397D12.6	GENCODE	363	chr9	+	37432083	37433871	CTGCTGGGTCTCTGTCCCTAAAGGAACAGAATGTAGGTGTGAGTGGATTTGTTTAAAAAA	exon sense-overlapping
ASHGA5P048458	0.0175363	1.64096	850.965	518.576	9.4877	9.20795	444.546	651.134	619.513	389.738	487.948	518.576	679.391	725.276	916.498	919.468	1014.19	850.965	9.06434	8.7311	9.18594	9.00777	9.85383	9.63101	9.5586	9.42752	9.77582	9.24236	P	P	P	P	P	P	P	P	P	P	noncoding	AK098597		LincRNAs identified by Khalil et al	1683	chr4	+	42097863	42101378	AATACCATCTTATTCTAGCAAGAGTATCAGAGTGCGTTCATTCCTGAGGACCCTTTCCCT	intergenic
ASHGA5P051173	0.0313258	1.61976	57193.2	35309.6	15.5979	15.2734	43819.7	45098.1	25020.3	23246.9	39363	35309.6	75707.6	50618.8	42556.6	47036.1	70047	57193.2	15.9984	15.5191	15.4983	15.3135	15.2436	14.7998	15.2509	15.2509	15.9984	15.4836	P	P	P	P	P	P	P	P	P	P	noncoding	uc002zlf.2	P704P	UCSC_knowngene	4260	chr22	-	16251235	16255495	CAAATGCTTCTAGGTGGACGCTGACTTAGTTGCATTACACCCTTTCTTGACAAAACCAAA	intergenic
ASHGA5P033442	0.00836983	1.60186	59.8638	37.3715	5.74989	5.29974	36.6063	50.5094	32.7827	36.1164	30.8427	37.3715	58.0443	70.9725	51.9627	75.3221	43.0173	59.8638	5.55888	4.80653	5.95486	5.3994	5.82899	5.43556	6.08929	5.7621	5.31745	5.09511	P	P	P	P	P	P	P	P	P	P	noncoding	ENST00000493812	LGALS8-AS1	GENCODE	1430	chr1	-	236686370	236687800	CTGTAAACACACCAGCCAGAAATACAAATAAAGTTAAACAAAGTCATGTCAGCCACTTGG	intronic antisense
ASHGA5P033442	0.00836983	1.60186	59.8638	37.3715	5.74989	5.29974	36.6063	50.5094	32.7827	36.1164	30.8427	37.3715	58.0443	70.9725	51.9627	75.3221	43.0173	59.8638	5.55888	4.80653	5.95486	5.3994	5.82899	5.43556	6.08929	5.7621	5.31745	5.09511	P	P	P	P	P	P	P	P	P	P	noncoding	ENST00000493812	LGALS8-AS1	GENCODE	1430	chr1	-	236686370	236687800	CTGTAAACACACCAGCCAGAAATACAAATAAAGTTAAACAAAGTCATGTCAGCCACTTGG	natural antisense
ASHGA5P033442	0.00836983	1.60186	59.8638	37.3715	5.74989	5.29974	36.6063	50.5094	32.7827	36.1164	30.8427	37.3715	58.0443	70.9725	51.9627	75.3221	43.0173	59.8638	5.55888	4.80653	5.95486	5.3994	5.82899	5.43556	6.08929	5.7621	5.31745	5.09511	P	P	P	P	P	P	P	P	P	P	noncoding	ENST00000493812	LGALS8-AS1	GENCODE	1430	chr1	-	236686370	236687800	CTGTAAACACACCAGCCAGAAATACAAATAAAGTTAAACAAAGTCATGTCAGCCACTTGG	natural antisense
ASHGA5P033442	0.00836983	1.60186	59.8638	37.3715	5.74989	5.29974	36.6063	50.5094	32.7827	36.1164	30.8427	37.3715	58.0443	70.9725	51.9627	75.3221	43.0173	59.8638	5.55888	4.80653	5.95486	5.3994	5.82899	5.43556	6.08929	5.7621	5.31745	5.09511	P	P	P	P	P	P	P	P	P	P	noncoding	ENST00000493812	LGALS8-AS1	GENCODE	1430	chr1	-	236686370	236687800	CTGTAAACACACCAGCCAGAAATACAAATAAAGTTAAACAAAGTCATGTCAGCCACTTGG	natural antisense
ASHGA5P016000	0.0336434	1.59509	107.008	67.0854	6.56187	6.18971	93.3324	60.2546	55.077	53.5345	73.2286	67.0854	142.404	97.4767	77.1509	100.487	117.52	107.008	6.83051	6.31864	6.3759	5.64445	6.395	6.21366	6.49081	6.41765	6.71713	6.35414	P	P	P	P	P	P	P	P	P	P	noncoding	ENST00000425698	RP11-134P9.1	GENCODE	355	chr1	-	203269641	203273676	AGATGCCGTGTTTGTAAGTCCTGGTTGCTCATCTCGCCCACTTGCACAGCCCACCTGTGT	bidirectional
ASHGA5P050297	0.0233596	1.59097	173.928	109.322	7.25415	6.88339	126.146	151.189	97.1932	65.8693	106.213	109.322	186.867	142.01	186.078	168.408	186.279	173.928	7.22385	6.79707	6.89088	6.92106	7.59843	7.02379	7.18456	6.7538	7.37302	6.92122	P	P	P	P	P	P	P	P	P	P	noncoding	ENST00000576494	LINC00085	GENCODE	495	chr19	+	52197769	52207459	AGACCAGCGCCCCCTGGCCCGGCTCTACTTCTTTCTTAACGGTGGGGCGGGGCGCGGCCG	intergenic
ASHGA5P023463	0.0418222	1.58165	110.775	70.0375	6.60742	6.22387	77.4599	99.5873	62.1809	48.2814	62.6781	70.0375	113.868	133.069	98.53	79.9341	128.471	110.775	6.49981	6.02461	6.7961	6.33676	6.73026	6.38575	6.1751	6.25157	6.83585	6.12063	P	P	P	P	P	P	P	M	P	P	noncoding	ENST00000581489	RP13-516M14.4	GENCODE	1810	chr17	-	80247921	80250690	GCCGTACCAGTGATGCAAGATGGTCCTTTCTGAGCAGAGCTCCCCTCGCTCAGTGCTCCT	intergenic
ASHGA5P018488	0.0308019	1.57461	69.1647	43.925	5.93608	5.45039	36.7798	68.291	40.854	24.784	48.9162	43.925	54.2696	93.253	48.0258	66.5592	83.716	69.1647	5.47118	4.81588	6.31818	5.82178	5.72141	5.77271	5.91962	5.08171	6.24999	5.7599	P	P	P	P	P	P	P	P	P	P	noncoding	ENST00000454129	HCG18	GENCODE	4433	chr6	-	30258782	30294153	AGCTTAGCAGAGCTCCCTCTTTGCCCACTAGCAGGGCATTAGCTGGTGCTGAAGACAGTG	bidirectional
ASHGA5P018488	0.0308019	1.57461	69.1647	43.925	5.93608	5.45039	36.7798	68.291	40.854	24.784	48.9162	43.925	54.2696	93.253	48.0258	66.5592	83.716	69.1647	5.47118	4.81588	6.31818	5.82178	5.72141	5.77271	5.91962	5.08171	6.24999	5.7599	P	P	P	P	P	P	P	P	P	P	noncoding	ENST00000454129	HCG18	GENCODE	4433	chr6	-	30258782	30294153	AGCTTAGCAGAGCTCCCTCTTTGCCCACTAGCAGGGCATTAGCTGGTGCTGAAGACAGTG	bidirectional
ASHGA5P020434	0.000326237	1.53728	161.832	105.272	7.11021	6.81132	90.0772	173.007	95.2711	77.8538	90.1511	105.272	110.858	214.576	154.633	187.571	141.523	161.832	6.45939	6.26232	7.45581	7.11695	7.32843	6.99604	7.33322	7.0171	6.9742	6.66418	P	P	P	P	P	P	P	P	P	P	noncoding	ENST00000513466	FAM86HP	pseudogene	959	chr3	-	129818100	129830315	CTATTTGCTGCACAGCCATCATCTCCCACGGTACCACAGGCCTGGTCACATGGGACGCTG
ASHGA5P045066	0.0481795	1.52067	110.158	72.4404	6.51358	6.22358	49.5087	123.752	68.6385	54.0789	66.2244	72.4404	58.5923	184.165	93.808	131.53	82.6972	110.158	5.57127	5.30982	7.24933	6.64261	6.65938	6.52705	6.85682	6.43444	6.23113	6.20398	P	P	M	M	P	P	P	P	M	P	noncoding	ENST00000439341	RP5-858B6.3	GENCODE	794	chr1	+	231010591	231014761	CATTAGCCAAAGCTCCGGGACTTGGTTAAAACTTTAGGCAATTAAAAAGACTGACTTATG	intergenic
ASHGA5P023250	0.0427416	1.50596	145.441	96.577	7.00343	6.73177	109.252	122.62	86.0577	72.8098	92.1455	96.577	147.785	138.289	130.224	136.85	174.055	145.441	6.88578	6.57354	6.85165	6.63226	7.10198	6.84571	6.90495	6.90849	7.27281	6.69885	P	P	P	P	P	M	P	P	P	P	noncoding	NR_033656	STX8	RefSeq	782	chr17	-	9153787	9479275	CAATATGAAAGAAAAGGTGAAAAGGCACCAAAGGTCCAGCCTGATGAGTGAAGAGGCTAA	exon sense-overlapping
ASHGA5P018893	0.0260979	1.50072	227.333	151.483	7.62114	7.2866	204.438	233.245	118.101	64.4163	137.216	151.483	270.788	237.377	196.533	186.109	245.86	227.333	7.7475	7.5538	7.59305	7.54502	7.68121	7.29893	7.32233	6.72049	7.76159	7.31479	P	P	P	P	P	P	P	P	P	P	noncoding	ENST00000484945	FAM86DP	GENCODE	2238	chr3	-	75470710	75484108	CTCCTGCCACAGCTTAGAAGCAAAGTTAAGAGACTCATCAGATTCTGAGCTGCTGCGGGA	intergenic
ASHGA5P032603	0.00683091	1.49989	86.6149	57.7474	6.28225	5.93928	64.4658	62.4764	69.4324	36.0856	56.2769	57.7474	97.1629	71.4745	100.741	83.8828	79.8131	86.6149	6.26745	5.73913	5.96187	5.69209	6.75888	6.54295	6.24019	5.76059	6.18285	5.96162	P	P	P	P	P	P	P	P	P	P	noncoding	ENST00000582201	PLEKHM1P	pseudogene	3166	chr17	-	62781376	62825326	AGATGAGGTATATGAAGGATTCCTCAAGGCCCTGATTGAATTTGCCTCCCAGCATGTCTA
ASHGA5P029361	0.0348003	1.47076	101.466	68.989	6.48621	6.20557	85.6834	90.2289	54.4836	47.78	66.7689	68.989	139.569	97.6443	73.7845	103.694	92.6408	101.466	6.79977	6.18006	6.37794	6.20277	6.32981	6.19731	6.53317	6.23228	6.39038	6.21544	P	P	P	P	P	P	P	M	P	P	noncoding	ENST00000568177	RP11-600F24.7	GENCODE	4063	chr14	-	103991346	103995409	TAGGCAGCCCTGCCCTCTGGATCTCATATCTGCAGTTCTGACCTTGCCTGTGGAGGGAAA	bidirectional
ASHGA5P017465	0.0420479	1.46452	62.3904	42.6013	5.79779	5.38002	61.0861	56.6342	25.1114	23.4913	46.6833	42.6013	89.0857	59.7978	43.1175	61.9238	58.027	62.3904	6.14782	5.65128	5.7235	5.55565	5.56149	5.00792	5.8243	4.99269	5.73183	5.69254	P	P	P	P	P	P	P	P	P	P	noncoding	uc003pgp.1	BC031876	UCSC_knowngene	1056	chr6	+	73972949	73986225	AATTACATCTGCAAAGACCTTATTTCCAGGCTCAAGCAGAGTCTTCCTCCTGGTGTTCCA	intronic antisense
ASHGA5P039556	0.0427612	1.43939	80043.1	55609	16.1449	15.7284	27891.6	87858.4	70563.5	19675.1	72056.5	55609	62286.4	83380.8	99385.4	52711	102452	80043.1	15.7036	14.8445	16.2349	16.2682	16.6035	16.212	15.4983	15.0188	16.6841	16.2983	P	P	P	M	P	P	P	P	P	P	noncoding	ENST00000485827	AC004057.1	pseudogene	348	chr4	-	114135201	114135549	CTGTGCCCGATGCGTGCCCAAGGACAAGGCCATTAAGAAATTCGTCATTCGAAACATAGT
ASHGA5P023445	0.0314479	1.4305	75.1668	52.5458	6.04796	5.75613	73.9634	67.9216	41.992	30.2647	48.5874	52.5458	107.04	85.6699	50.2878	64.4578	68.3784	75.1668	6.40795	5.95418	6.20193	5.81488	5.78405	5.81123	5.8775	5.44863	5.96835	5.75172	P	P	P	P	P	P	P	P	P	P	noncoding	ENST00000581072	hsa-mir-133a-1	GENCODE	4226	chr18	-	19405447	19411367	ATGTGACAAGGTGAGGTTCTGTGTTCACTGATACATCCCCTTCCTTCACCGGGCTCATGA	intronic antisense
ASHGA5P052064	0.0445483	1.41078	91.6954	64.9962	6.35	6.09278	86.4007	86.4728	38.6068	48.1407	65.3603	64.9962	114.197	82.5952	68.2929	104.999	88.3919	91.6954	6.50364	6.19533	6.15031	6.14872	6.22083	5.6902	6.55052	6.24618	6.32469	6.18347	P	P	P	P	P	P	P	P	P	P	noncoding	uc003ifc.3	LOC285419	UCSC_knowngene	6506	chr4	+	124571421	124589231	TGTTTAACTATCTCCCTTGAACTATGGCCTGTAGGATTCTGCCTGCTTTCTAGTCCTTTT	intergenic
ASHGA5P056596	0.0339522	1.37778	46.0436	33.4186	5.39823	5.08693	39.2243	41.9791	25.9873	22.7435	37.1589	33.4186	45.3449	60.3693	42.2738	34.7264	47.5036	46.0436	5.22173	4.92426	5.73774	5.14684	5.53403	5.06507	5.04816	4.93525	5.44948	5.36322	P	P	P	P	P	P	P	P	P	P	noncoding	TCONS_00006456	XLOC_003067	LincRNAs identified by Cabili et al	366	chr3	-	24079060	24086331	TTAGAAGTCTCTGCCACTGCTTATCATAATGTGTGTGGCACCTCTCGTCTCTCTCTTTCT	intergenic
ASHGA5P019173	0.00625727	1.29964	46.2868	35.6149	5.42759	5.21163	43.665	43.0051	28.0363	27.6961	35.6722	35.6149	49.5621	45.325	41.4687	49.8494	45.2287	46.2868	5.34302	5.10635	5.36322	5.17854	5.50967	5.18303	5.53771	5.28501	5.38435	5.3052	P	P	P	P	P	P	P	P	P	P	noncoding	ENST00000471276	TMEM198B	GENCODE	1958	chr12	+	56224637	56230030	GAAGGGTGAGTGAGCCATTCCTCTCCCTTGGAATTCATCAGAGTCATCCCTGTAGAGCCC	natural antisense
ASHGA5P017817	0.0145815	1.25419	1237.67	986.83	10.0164	10.1526	995.817	1358.77	804.445	686.186	1088.93	986.83	1210.99	1228.51	1010.43	1267.27	1471.15	1237.67	9.87645	9.96016	9.90779	10.0911	9.98189	10.0187	10.0216	10.2374	10.2943	10.4559	P	P	M	P	P	P	P	P	P	P	noncoding	NR_027055	FAM41C	RefSeq	1779	chr1	-	803450	812182	CCCAATGAAGGAACAGCAAGAGGACCTTGTGCATGAATAATTTGTTTCCATACTACAGAG	intergenic
ASHGA5P016686	0.0378396	1.22002	1080.24	885.433	9.83126	9.99997	944.216	1108.07	712.995	611.069	1050.82	885.433	1100.64	1049.66	885.394	1083.9	1281.62	1080.24	9.73799	9.87056	9.71012	9.791	9.80407	9.83739	9.79891	10.096	10.1052	10.405	P	P	P	P	P	P	P	P	P	P	noncoding	ENST00000432963	FAM41C	GENCODE	504	chr1	-	803619	805581	GATGGCGAAAGGAACAGCAAGAGGACCTTGTGCATGAATAATTTGTTTCCATACTACAGA	intergenic
ASHGA5P032723	0.0448753	1.19233	7174.8	6017.48	12.4734	12.76	6459.03	8353.49	6706.35	4739.45	3829.07	6017.48	6722.89	7585.26	6728.53	10959.4	3877.88	7174.8	12.3015	12.698	12.6041	12.79	12.6554	13.0219	13.0957	13.0506	11.7103	12.2398	P	P	P	P	P	P	P	P	P	P	noncoding	uc001bep.1	AK098438	UCSC_knowngene	2057	chr1	-	21749600	21754300	ATATCAATACTTAGGAAGACCACAGCTAGATGGACAAACAGCATTGAGAGGCCTTAGCCC	intergenic
ASHGA5P016198	0.0286238	1.17928	980.991	831.854	9.69129	9.89728	889.634	1053.67	671.541	538.382	1006.04	831.854	964.383	1033.38	779.506	953.706	1173.98	980.991	9.55921	9.7773	9.68848	9.71233	9.62798	9.74627	9.60445	9.91209	9.97631	10.3384	P	P	P	P	P	P	P	P	P	P	noncoding	ENST00000427857	FAM41C	GENCODE	446	chr1	-	803782	812182	TTCAGTGCATGAACAGCAAGAGGACCTTGTGCATGAATAATTTGTTTCCATACTACAGAG	intergenic
ASHGA5P048945	0.041113	1.15362	6728.25	5832.32	12.4565	12.7444	6309.09	7154.42	5522.13	4249.79	5926.15	5832.32	7243.44	5824.15	7251.49	6266.32	7055.85	6728.25	12.4134	12.6686	12.2233	12.5676	12.7695	12.7381	12.3124	12.8858	12.5639	12.8618	P	P	P	P	P	P	M	P	P	P	noncoding	uc010bpo.3	WASH3P	UCSC_knowngene	1321	chr15	+	102513422	102516808	TAAAGAACTGAGCAGAAACCAACAGTGTGCTTTTAATAAAGGATCTCTAGCTGTGCAGGA	intergenic
ASHGA5P015795	0.0234873	1.13459	4337.87	3823.3	11.6753	11.9428	2381.16	8408.08	2167.73	3877.96	2281.58	3823.3	2610.7	5905.13	2287.46	7823.76	3062.28	4337.87	10.9922	11.2328	12.2518	12.7991	11.1315	11.4041	12.624	12.771	11.3772	11.5068	P	P	P	P	P	P	P	P	P	P	noncoding	ENST00000423617	RP11-622K12.1	GENCODE	541	chrX	+	56755788	56844059	CCTAAACCAGTCTTATGATGTAATCAGCGCGATTTCACTTCCTGAATTTCGATGAATTCT	intergenic
ASHGA5P021413	0.0421347	1.11044	264.053	237.792	7.81512	8.00634	289.658	376.868	192.806	136.753	192.876	237.792	260.362	369.248	218.092	256.1	216.465	264.053	7.69079	8.08825	8.20597	8.22321	7.83935	7.99067	7.75984	7.88476	7.57964	7.84479	P	P	P	P	P	P	P	P	P	P	noncoding	NR_027635	SPATA5L1	RefSeq	2610	chr15	+	45694518	45713616	AAGGAGCTGAAAAAATGAAGAGAGTTTCAAGAAGTTTTTAACCGAAGTGTCATGATTATT	exon sense-overlapping
ASHGA5P038080	0.0463764	1.09003	371.407	340.73	8.29609	8.606	361.268	431.764	293.698	296.903	320.018	340.73	369.369	309.666	274.709	430.329	472.963	371.407	8.17269	8.417	7.95706	8.40507	8.1557	8.5846	8.49961	9.01421	8.6954	8.60911	P	P	P	P	P	P	P	P	P	P	noncoding	ENST00000412804	AC024168.2	GENCODE	858	chr3	-	4532574	4534847	TTGTGCTCTCTACCTCCCCTGACCCAGAAGGACTTATTCTTCTTTCTGCACATTTTAGTA	bidirectional
ASHGA5P038080	0.0463764	1.09003	371.407	340.73	8.29609	8.606	361.268	431.764	293.698	296.903	320.018	340.73	369.369	309.666	274.709	430.329	472.963	371.407	8.17269	8.417	7.95706	8.40507	8.1557	8.5846	8.49961	9.01421	8.6954	8.60911	P	P	P	P	P	P	P	P	P	P	noncoding	ENST00000412804	AC024168.2	GENCODE	858	chr3	-	4532574	4534847	TTGTGCTCTCTACCTCCCCTGACCCAGAAGGACTTATTCTTCTTTCTGCACATTTTAGTA	bidirectional
ASHGA5P038080	0.0463764	1.09003	371.407	340.73	8.29609	8.606	361.268	431.764	293.698	296.903	320.018	340.73	369.369	309.666	274.709	430.329	472.963	371.407	8.17269	8.417	7.95706	8.40507	8.1557	8.5846	8.49961	9.01421	8.6954	8.60911	P	P	P	P	P	P	P	P	P	P	noncoding	ENST00000412804	AC024168.2	GENCODE	858	chr3	-	4532574	4534847	TTGTGCTCTCTACCTCCCCTGACCCAGAAGGACTTATTCTTCTTTCTGCACATTTTAGTA	bidirectional
ASHGA5P013973	0.0423626	1.08424	1016.64	937.65	9.66215	9.97105	1234.05	1380.81	1042.55	643.613	387.231	937.65	1076.22	1227.71	1324.91	986.558	467.785	1016.64	9.70492	10.2953	9.90737	10.1137	10.3611	10.3764	9.65836	10.1627	8.67901	8.90712	P	P	P	P	P	P	P	P	P	P	noncoding	uc002ije.3	LRRC37A4	UCSC_knowngene	2746	chr17	-	43578683	43592891	GGAGAGTCAGACGGCCGCTCTGGCTTAAAGATATGTACAAACCTCTCAGTGCCACAAGAG	intronic antisense
ASHGA5P053854	0.0463276	1.05857	763.617	721.369	9.32676	9.67683	709.693	1109.39	618.438	512.726	656.596	721.369	686.225	934.87	764.741	878.391	553.859	763.617	9.0809	9.43311	9.54624	9.79273	9.59983	9.62935	9.49598	9.83465	8.91083	9.69431	P	P	P	P	P	P	P	P	P	P	noncoding	uc004bxx.3	LOC100506190	UCSC_knowngene	1577	chr9	+	132250938	132266538	AGATCCATCGGTGAGCTCCCGCCTGCCACCTCTGGGCCTGCATTGCGGTGATAGGGCCAA	intergenic
ASHGA5P047778	0.00948543	1.04944	81.348	77.5153	6.18436	6.39447	95.6365	96.8512	57.9122	59.5854	77.5911	77.5153	92.3956	86.4082	58.435	93.7668	75.7344	81.348	6.20044	6.35902	6.21496	6.29416	6.0043	6.28775	6.39462	6.59114	6.10749	6.44027	P	P	P	P	P	P	P	P	P	P	noncoding	ENST00000445868	RP11-462G8.2	GENCODE	760	chr10	+	132897967	132903660	ACTCCACCCTTCACTGTGCTGCTAGTGTTCTCTGGACCACTCCTATTTCATCACTATTAT	intronic antisense
ASHGA5P054612	0.0319242	1.04717	983.391	939.09	9.68129	10.0194	995.45	1519.01	915.584	781.072	484.33	939.09	1002.04	1002.43	999.598	1216.39	696.491	983.391	9.60349	9.95801	9.64627	10.2604	9.96968	10.2107	9.95873	10.4377	9.22828	9.23001	P	M	P	P	P	P	P	P	P	P	noncoding	uc021pzu.1	AX747838	UCSC_knowngene	1247	chr10	+	122667788	122669035	TATGGTTTACAGAAACTCATCACTGCTATATATGCAGATTATGCCCGGAGTTTGAAGAAC	exon sense-overlapping
ASHGA5P025907	0.0290714	1.04306	1094.94	1049.74	9.85414	10.2066	1406.57	1520.44	901.507	616.163	804.028	1049.74	1212.53	1018.93	945.562	1218.64	1079.03	1094.94	9.87992	10.4872	9.66706	10.2625	9.89465	10.1877	9.96321	10.1052	9.86586	9.99018	P	P	P	P	P	P	P	P	P	P	noncoding	NR_046172	RAB18	RefSeq	4941	chr10	+	27793102	27831166	GCAACAATAGGATACTGCTGGTCAAGAGAGGTTTAGAACATTAACTCCCAGCTATTATAG	exon sense-overlapping
ASHGA5P025907	0.0290714	1.04306	1094.94	1049.74	9.85414	10.2066	1406.57	1520.44	901.507	616.163	804.028	1049.74	1212.53	1018.93	945.562	1218.64	1079.03	1094.94	9.87992	10.4872	9.66706	10.2625	9.89465	10.1877	9.96321	10.1052	9.86586	9.99018	P	P	P	P	P	P	P	P	P	P	noncoding	NR_046172	RAB18	RefSeq	4941	chr10	+	27793102	27831166	GCAACAATAGGATACTGCTGGTCAAGAGAGGTTTAGAACATTAACTCCCAGCTATTATAG	exon sense-overlapping
ASHGA5P025907	0.0290714	1.04306	1094.94	1049.74	9.85414	10.2066	1406.57	1520.44	901.507	616.163	804.028	1049.74	1212.53	1018.93	945.562	1218.64	1079.03	1094.94	9.87992	10.4872	9.66706	10.2625	9.89465	10.1877	9.96321	10.1052	9.86586	9.99018	P	P	P	P	P	P	P	P	P	P	noncoding	NR_046172	RAB18	RefSeq	4941	chr10	+	27793102	27831166	GCAACAATAGGATACTGCTGGTCAAGAGAGGTTTAGAACATTAACTCCCAGCTATTATAG	exon sense-overlapping
ASHGA5P025907	0.0290714	1.04306	1094.94	1049.74	9.85414	10.2066	1406.57	1520.44	901.507	616.163	804.028	1049.74	1212.53	1018.93	945.562	1218.64	1079.03	1094.94	9.87992	10.4872	9.66706	10.2625	9.89465	10.1877	9.96321	10.1052	9.86586	9.99018	P	P	P	P	P	P	P	P	P	P	noncoding	NR_046172	RAB18	RefSeq	4941	chr10	+	27793102	27831166	GCAACAATAGGATACTGCTGGTCAAGAGAGGTTTAGAACATTAACTCCCAGCTATTATAG	exon sense-overlapping
ASHGA5P025907	0.0290714	1.04306	1094.94	1049.74	9.85414	10.2066	1406.57	1520.44	901.507	616.163	804.028	1049.74	1212.53	1018.93	945.562	1218.64	1079.03	1094.94	9.87992	10.4872	9.66706	10.2625	9.89465	10.1877	9.96321	10.1052	9.86586	9.99018	P	P	P	P	P	P	P	P	P	P	noncoding	NR_046172	RAB18	RefSeq	4941	chr10	+	27793102	27831166	GCAACAATAGGATACTGCTGGTCAAGAGAGGTTTAGAACATTAACTCCCAGCTATTATAG	exon sense-overlapping
ASHGA5P048071	0.0013786	1.02596	91.6293	89.3109	6.35335	6.58701	132.15	100.665	69.1728	59.1396	85.4272	89.3109	118.181	78.866	74.027	91.4334	95.6393	91.6293	6.55192	6.88083	6.08943	6.35187	6.33463	6.53786	6.35595	6.57619	6.43481	6.58832	P	P	P	P	P	P	P	P	P	P	noncoding	ENST00000527426	RP11-750H9.5	GENCODE	836	chr11	-	47404698	47417191	ATTTATTATAGCCATGAAATGCTCTGCTCTCTTCTCTTTTCCTTGCTGTCCCTGGGGCTG	intergenic
ASHGA5P025774	0.0181867	1.01638	1107.62	1089.77	9.83423	10.2587	1245.13	1665.61	1084.94	730.339	722.817	1089.77	911.556	1323.71	1182.3	1360.8	759.726	1107.62	9.48299	10.3081	10.0231	10.389	10.1991	10.4315	10.1073	10.334	9.35878	9.83085	P	P	P	P	P	P	P	P	P	P	noncoding	NR_036454	CHMP3	RefSeq	2953	chr2	-	86730552	86790620	CAAAGAACTGCGGTCTTGCGAGTGGCTGGTTCCCTGCAGAAGAGCACAGAAGTGATGAAG	exon sense-overlapping
ASHGA5P025774	0.0181867	1.01638	1107.62	1089.77	9.83423	10.2587	1245.13	1665.61	1084.94	730.339	722.817	1089.77	911.556	1323.71	1182.3	1360.8	759.726	1107.62	9.48299	10.3081	10.0231	10.389	10.1991	10.4315	10.1073	10.334	9.35878	9.83085	P	P	P	P	P	P	P	P	P	P	noncoding	NR_036454	CHMP3	RefSeq	2953	chr2	-	86730552	86790620	CAAAGAACTGCGGTCTTGCGAGTGGCTGGTTCCCTGCAGAAGAGCACAGAAGTGATGAAG	exon sense-overlapping
ASHGA5P025774	0.0181867	1.01638	1107.62	1089.77	9.83423	10.2587	1245.13	1665.61	1084.94	730.339	722.817	1089.77	911.556	1323.71	1182.3	1360.8	759.726	1107.62	9.48299	10.3081	10.0231	10.389	10.1991	10.4315	10.1073	10.334	9.35878	9.83085	P	P	P	P	P	P	P	P	P	P	noncoding	NR_036454	CHMP3	RefSeq	2953	chr2	-	86730552	86790620	CAAAGAACTGCGGTCTTGCGAGTGGCTGGTTCCCTGCAGAAGAGCACAGAAGTGATGAAG	exon sense-overlapping
ASHGA5P025774	0.0181867	1.01638	1107.62	1089.77	9.83423	10.2587	1245.13	1665.61	1084.94	730.339	722.817	1089.77	911.556	1323.71	1182.3	1360.8	759.726	1107.62	9.48299	10.3081	10.0231	10.389	10.1991	10.4315	10.1073	10.334	9.35878	9.83085	P	P	P	P	P	P	P	P	P	P	noncoding	NR_036454	CHMP3	RefSeq	2953	chr2	-	86730552	86790620	CAAAGAACTGCGGTCTTGCGAGTGGCTGGTTCCCTGCAGAAGAGCACAGAAGTGATGAAG	exon sense-overlapping
ASHGA5P058249	0.0337657	1.00697	378.679	376.056	8.3403	8.74013	496.779	357.418	321.27	271.544	433.272	376.056	487.695	328.625	340.353	316.921	419.802	378.679	8.58144	8.89083	8.0478	8.15272	8.47269	8.70246	8.0662	8.8839	8.5334	9.07071	P	P	P	P	P	P	P	M	P	P	noncoding	TCONS_00028561	XLOC_013552	LincRNAs identified by Cabili et al	3706	chr20	+	47099590	47104748	AGAGCAGCATTGGCTCCTCCCCAGGTCTCCAGCTCCACCATCATCAAACTTGAATGGCAG	intergenic
ASHGA5P058587	0.0168107	1.00486	91.1856	90.7448	6.30927	6.57881	113.446	118.041	61.7317	51.1383	109.368	90.7448	89.4589	94.9773	61.101	74.2926	136.098	91.1856	6.15309	6.63085	6.34585	6.58287	6.06363	6.37565	6.07163	6.33946	6.91218	6.96521	P	P	P	P	P	P	P	P	P	P	noncoding	uc010mtj.1	AK311445	UCSC_knowngene	643	chr9	+	107689910	107692150	TAACGCCCAACTCCATCATATTCCAGAACTCCCACCACCTGCATACAGACATTCAGCTGC	intronic antisense
ASHGA5P052231	0.0459883	0.993568	188.815	190.037	7.35375	7.73282	220.243	255.246	158.377	134.175	182.144	190.037	188.593	194.728	200.463	222.787	137.502	188.815	7.23671	7.66246	7.31911	7.67356	7.70971	7.715	7.57393	7.85743	6.92931	7.75562	P	P	P	P	P	P	P	P	P	P	noncoding	ENST00000508913	AC025171.1	GENCODE	2311	chr5	+	43042234	43045370	GCTTTTCCAGGTCACCCCTCGCTGCCAGGCTCTCTTCCCGGTCCAGAGCCCACAGGATCC	natural antisense
ASHGA5P022560	0.0320456	0.992254	52.3116	52.72	5.57005	5.7869	76.8045	64.836	40.863	36.4478	44.6487	52.72	67.4676	49.3249	36.9078	55.0544	52.8035	52.3116	5.75593	6.00936	5.47162	5.74717	5.35774	5.77348	5.67028	5.77647	5.59469	5.628	P	P	P	P	P	P	P	P	P	P	noncoding	ENST00000558785	RP11-108K3.4	GENCODE	174	chr15	+	51659573	51661307	TCAAACCAACACTTGAGTGCCCTCACCAAGTCTTGGCCCCTGTGTGAATTCCTGCCTTTC	intron sense-overlapping
ASHGA5P021462	0.0111322	0.990967	264.544	266.956	7.83613	8.21614	382.021	284.828	253.679	160.73	253.52	266.956	314.929	251.783	226.843	288.372	240.793	264.544	7.95675	8.4962	7.67051	7.82138	7.88943	8.38043	7.93139	8.12662	7.73254	8.25606	P	P	P	P	P	P	P	P	P	P	noncoding	ENST00000532831	RP11-705O3.1	GENCODE	856	chr11	+	77850816	77853105	AAGATACAGAGCTTTTAGAAGTTGCCTGCATTCCTTGGCCCCTTCCTCACATCATTCCAA	bidirectional
ASHGA5P021462	0.0111322	0.990967	264.544	266.956	7.83613	8.21614	382.021	284.828	253.679	160.73	253.52	266.956	314.929	251.783	226.843	288.372	240.793	264.544	7.95675	8.4962	7.67051	7.82138	7.88943	8.38043	7.93139	8.12662	7.73254	8.25606	P	P	P	P	P	P	P	P	P	P	noncoding	ENST00000532831	RP11-705O3.1	GENCODE	856	chr11	+	77850816	77853105	AAGATACAGAGCTTTTAGAAGTTGCCTGCATTCCTTGGCCCCTTCCTCACATCATTCCAA	bidirectional
ASHGA5P022577	0.0461469	0.988813	786.803	795.705	9.35641	9.74615	1196.12	1150.88	675.783	383.421	572.325	795.705	1038.16	754.564	901.67	535.186	704.438	786.803	9.6598	10.2502	9.23171	9.84529	9.83085	9.75371	8.81341	9.40241	9.24626	9.47919	P	P	P	P	P	P	P	P	P	P	noncoding	ENST00000559039	UBE2Q2P3	pseudogene	809	chr15	+	83060588	83088805	GTTGTCAGATTATAAATGTTGACCCTGATAGTCCTTTGCACAGTGATCTTTAGATCTTAA
ASHGA5P026642	0.0301978	0.981717	118.91	121.125	6.70181	7.07468	138.862	156.04	96.7758	108.338	105.608	121.125	149.587	132.418	89.3755	132.968	90.2028	118.91	6.90142	6.955	6.7899	6.96464	6.59311	7.0167	6.87235	7.52393	6.35227	6.91312	P	P	M	P	P	P	P	M	P	P	noncoding	ENST00000529215	CTD-2562J17.7	GENCODE	506	chr11	+	74971170	74972069	TGTGTAAAGATGAATTTAACCCTAGCCTCTCTCCTATCACACTGCTTCTCCTGCTGTGTC	natural antisense
ASHGA5P026642	0.0301978	0.981717	118.91	121.125	6.70181	7.07468	138.862	156.04	96.7758	108.338	105.608	121.125	149.587	132.418	89.3755	132.968	90.2028	118.91	6.90142	6.955	6.7899	6.96464	6.59311	7.0167	6.87235	7.52393	6.35227	6.91312	P	P	M	P	P	P	P	M	P	P	noncoding	ENST00000529215	CTD-2562J17.7	GENCODE	506	chr11	+	74971170	74972069	TGTGTAAAGATGAATTTAACCCTAGCCTCTCTCCTATCACACTGCTTCTCCTGCTGTGTC	natural antisense
ASHGA5P019770	0.0453504	0.979205	399.065	407.54	8.30566	8.79225	564.387	592.358	355.482	274.153	251.318	407.54	700.338	482.882	311.545	287.867	212.692	399.065	9.11231	9.09332	8.58892	8.86623	8.34273	8.86008	7.92777	8.89698	7.55655	8.24465	P	P	P	P	P	P	P	P	P	P	noncoding	ENST00000502881	AC115115.2	GENCODE	424	chr2	+	113089718	113091836	AGGAGTTCTGTTCTGTGCTAAAATGGGGTTGTGGTTAAGTGAACGAGAACTCTGCCTACC	exon sense-overlapping
ASHGA5P041761	0.00319888	0.978024	96.1772	98.3382	6.41504	6.75435	137.291	105.793	79.0897	72.2612	97.2555	98.3382	132.373	85.8245	76.0125	100.554	86.1217	96.1772	6.71768	6.93774	6.20496	6.42581	6.37294	6.72579	6.49209	6.89872	6.28753	6.78369	P	P	P	M	P	P	M	M	P	P	noncoding	ENST00000419481	HCG21	GENCODE	605	chr6	-	30913755	30922639	TCCACATTGTAGTCTCTGAAATAATCTCGTGCTTTGCCCTGTCCTTCTCCTGGTAGTAAG	natural antisense
ASHGA5P055466	0.0192106	0.975904	15125.5	15498.9	13.6025	14.1473	14528.5	19612.7	14999.9	12521	15832.4	15498.9	17323.6	15454.2	11703.7	13991.1	17154.6	15125.4	13.7093	13.9194	13.6977	14.0013	13.4003	14.1336	13.4028	14.3977	13.8025	14.2843	P	P	P	P	P	P	P	P	P	P	noncoding	TCONS_00029068	XLOC_013994	LincRNAs identified by Cabili et al	312	chr21	-	9826393	9827584	ACCATGGTAGGCACGGCGACTACCATCGAAAGTTGATAGGGCAGACGTTCGAATGGGTCG	intergenic
ASHGA5P019405	0.0463558	0.974998	1733.26	1777.71	10.4467	10.9938	1745.27	2734.68	1426.56	1233.1	1748.92	1777.71	1169.39	1339.93	1488.38	2471.8	2196.81	1733.26	9.822	10.7828	10.044	11.1087	10.5251	10.8138	10.9542	11.1178	10.8882	11.1459	P	P	P	P	P	P	P	P	P	M	noncoding	NR_073060	C7orf55	RefSeq	969	chr7	+	139025195	139031065	TGGGCGCTAGGTCACCAGTGAAAAGTTGTGCAGAGCCCAACATGAGCTTCATTTCCAAGC	exon sense-overlapping
ASHGA5P019405	0.0463558	0.974998	1733.26	1777.71	10.4467	10.9938	1745.27	2734.68	1426.56	1233.1	1748.92	1777.71	1169.39	1339.93	1488.38	2471.8	2196.81	1733.26	9.822	10.7828	10.044	11.1087	10.5251	10.8138	10.9542	11.1178	10.8882	11.1459	P	P	P	P	P	P	P	P	P	M	noncoding	NR_073060	C7orf55	RefSeq	969	chr7	+	139025195	139031065	TGGGCGCTAGGTCACCAGTGAAAAGTTGTGCAGAGCCCAACATGAGCTTCATTTCCAAGC	exon sense-overlapping
ASHGA5P019405	0.0463558	0.974998	1733.26	1777.71	10.4467	10.9938	1745.27	2734.68	1426.56	1233.1	1748.92	1777.71	1169.39	1339.93	1488.38	2471.8	2196.81	1733.26	9.822	10.7828	10.044	11.1087	10.5251	10.8138	10.9542	11.1178	10.8882	11.1459	P	P	P	P	P	P	P	P	P	M	noncoding	NR_073060	C7orf55	RefSeq	969	chr7	+	139025195	139031065	TGGGCGCTAGGTCACCAGTGAAAAGTTGTGCAGAGCCCAACATGAGCTTCATTTCCAAGC	exon sense-overlapping
ASHGA5P018430	0.00894253	0.974032	410.632	421.579	8.44922	8.82822	414.939	755.13	350.175	255.92	331.733	421.579	474.567	519.819	320.464	396.921	341.387	410.632	8.54606	8.61688	8.68793	9.22071	8.38564	8.82809	8.39235	8.80433	8.23414	8.67109	P	P	P	P	P	P	P	P	P	P	noncoding	NR_049788	SNX17	RefSeq	2212	chr2	+	27593362	27600400	ATAAGATTGTGCTAAGGAAGAGACGGTATCAGATATTGAGCGTGGGTGGATCTTGGTCAC	exon sense-overlapping
ASHGA5P018430	0.00894253	0.974032	410.632	421.579	8.44922	8.82822	414.939	755.13	350.175	255.92	331.733	421.579	474.567	519.819	320.464	396.921	341.387	410.632	8.54606	8.61688	8.68793	9.22071	8.38564	8.82809	8.39235	8.80433	8.23414	8.67109	P	P	P	P	P	P	P	P	P	P	noncoding	NR_049788	SNX17	RefSeq	2212	chr2	+	27593362	27600400	ATAAGATTGTGCTAAGGAAGAGACGGTATCAGATATTGAGCGTGGGTGGATCTTGGTCAC	exon sense-overlapping
ASHGA5P018430	0.00894253	0.974032	410.632	421.579	8.44922	8.82822	414.939	755.13	350.175	255.92	331.733	421.579	474.567	519.819	320.464	396.921	341.387	410.632	8.54606	8.61688	8.68793	9.22071	8.38564	8.82809	8.39235	8.80433	8.23414	8.67109	P	P	P	P	P	P	P	P	P	P	noncoding	NR_049788	SNX17	RefSeq	2212	chr2	+	27593362	27600400	ATAAGATTGTGCTAAGGAAGAGACGGTATCAGATATTGAGCGTGGGTGGATCTTGGTCAC	exon sense-overlapping
ASHGA5P018430	0.00894253	0.974032	410.632	421.579	8.44922	8.82822	414.939	755.13	350.175	255.92	331.733	421.579	474.567	519.819	320.464	396.921	341.387	410.632	8.54606	8.61688	8.68793	9.22071	8.38564	8.82809	8.39235	8.80433	8.23414	8.67109	P	P	P	P	P	P	P	P	P	P	noncoding	NR_049788	SNX17	RefSeq	2212	chr2	+	27593362	27600400	ATAAGATTGTGCTAAGGAAGAGACGGTATCAGATATTGAGCGTGGGTGGATCTTGGTCAC	exon sense-overlapping
ASHGA5P018430	0.00894253	0.974032	410.632	421.579	8.44922	8.82822	414.939	755.13	350.175	255.92	331.733	421.579	474.567	519.819	320.464	396.921	341.387	410.632	8.54606	8.61688	8.68793	9.22071	8.38564	8.82809	8.39235	8.80433	8.23414	8.67109	P	P	P	P	P	P	P	P	P	P	noncoding	NR_049788	SNX17	RefSeq	2212	chr2	+	27593362	27600400	ATAAGATTGTGCTAAGGAAGAGACGGTATCAGATATTGAGCGTGGGTGGATCTTGGTCAC	natural antisense
ASHGA5P018430	0.00894253	0.974032	410.632	421.579	8.44922	8.82822	414.939	755.13	350.175	255.92	331.733	421.579	474.567	519.819	320.464	396.921	341.387	410.632	8.54606	8.61688	8.68793	9.22071	8.38564	8.82809	8.39235	8.80433	8.23414	8.67109	P	P	P	P	P	P	P	P	P	P	noncoding	NR_049788	SNX17	RefSeq	2212	chr2	+	27593362	27600400	ATAAGATTGTGCTAAGGAAGAGACGGTATCAGATATTGAGCGTGGGTGGATCTTGGTCAC	natural antisense
ASHGA5P050862	0.00383093	0.97285	66.0223	67.8649	5.89325	6.17858	93.2806	84.4112	51.5245	47.3088	62.7992	67.8649	83.2257	59.0012	49.1593	74.5058	64.2195	66.0223	6.05208	6.31799	5.70511	6.11653	5.7541	6.11806	6.07489	6.21623	5.88007	6.12406	P	P	P	P	P	P	P	P	P	P	noncoding	ENST00000427619	AC010148.1	GENCODE	707	chr2	-	235742958	235822028	AGCTCCCTTGCTTCCGTCTCTGCAGCAGCTACCTCCGTTCTCACACATGGCTTCTTCTGA	intergenic
ASHGA5P051663	0.0159608	0.972479	13789.7	14180	13.3459	13.8949	17468.4	13462.4	9150.1	5944.53	24874.5	14180	14792.3	8940.04	11203.8	7127.67	26884.9	13789.7	13.4982	14.1633	12.8742	13.5253	13.3383	13.4593	12.4875	13.4109	14.5312	14.9156	P	P	M	P	P	P	P	P	P	P	noncoding	ENST00000506593	RPL32P3	GENCODE	498	chr3	-	129115038	129118498	CAATGTCAAGGAGCTGAGAGTGCTGCTGATATGCAACAAGTGAGTTGGGTCCATCTCTGG	intergenic
ASHGA5P018529	0.00129074	0.972433	189.283	194.649	7.33992	7.72168	171.107	334.649	153.528	133.753	180.206	194.649	142.412	260.204	166.104	209.01	168.684	189.283	6.83082	7.28729	7.71672	8.05764	7.43658	7.6723	7.48558	7.85247	7.22988	7.7387	P	P	P	P	P	P	P	P	P	P	noncoding	ENST00000458346	RP11-492E3.1	GENCODE	566	chr9	+	132253270	132265853	CCTCCCTCAGGGCCCAGGACACAGTGAGCATACAATAGACATTAGCTGCTGTGGTGTCTT	intergenic
ASHGA5P018852	0.0281712	0.972197	72.6003	74.6766	6.02828	6.32259	90.6194	94.1128	80.5588	54.8693	53.2226	74.6766	68.0523	81.3967	87.5936	68.0836	57.8754	72.6003	5.76695	6.27149	6.12994	6.25621	6.5651	6.75229	5.95126	6.46103	5.72816	5.87195	P	P	P	P	P	P	P	P	P	P	noncoding	uc002fqa.1	AFG3L1P	UCSC_knowngene	2298	chr16	+	90046649	90063028	CTCTTCTGAAGTCCCCCTTACATTAAAGGCAGGTCCTCCATCTTTAAGGTCCACCTGCGC	intergenic
ASHGA5P023261	0.0444918	0.970999	110.706	114.012	6.62562	6.96773	145.283	142.064	80.1243	86.6346	115.955	114.012	134.11	106.119	103.476	101.254	108.57	110.706	6.73714	7.02528	6.49081	6.83585	6.79578	6.74537	6.5006	7.17536	6.60377	7.05677	P	P	P	P	P	P	P	P	P	P	noncoding	ENST00000576476	RP1-302G2.5	GENCODE	682	chr6	+	44184698	44185835	ATTGGTGGGGGCACTGACTCACTGGCCCTGCCATGCCCACGCCACTGCTCCCGCTGCTGC	intergenic
ASHGA5P044518	0.0445509	0.968082	48.7948	50.4036	5.47499	5.76905	56.442	57.0597	50.4631	54.4892	33.5639	50.4036	48.1161	40.2185	60.3968	60.8964	34.3461	48.7948	5.30087	5.52556	5.20881	5.5669	6.04913	6.08809	5.80229	6.44921	5.01384	5.21551	P	P	P	P	P	P	P	P	P	P	noncoding	ENST00000531948	RP11-1082L8.2	GENCODE	487	chr8	-	125948765	125956007	CAAGAGCCAAGGCCCCAGGGAAGCAGCAAAAAAATTGGAAGGAAACCCCAAAAACAGCAG	intergenic
ASHGA5P035126	0.0199781	0.966867	84.4884	87.3837	6.23856	6.57536	120.418	88.417	73.9237	60.5391	93.6206	87.3837	115.756	76.2483	74.4158	81.6845	74.3377	84.4884	6.52394	6.72493	6.04305	6.17843	6.34166	6.63101	6.20313	6.6177	6.08104	6.7247	P	P	P	P	P	P	P	P	P	P	noncoding	ENST00000414597	REG1P	GENCODE	580	chr2	-	79363990	79365495	AAGGAAGGTAATAGGTGCTCTGCTCTCATTCTCTCAAACCCTCTTCCCTGTGTTTTCCTA	intergenic
ASHGA5P032439	0.0238635	0.965841	152.786	158.19	7.06091	7.46686	211.212	188.195	123.465	125.596	142.48	158.19	160.313	161.764	146.275	179.527	116.051	152.786	7.00051	7.59724	7.06962	7.24142	7.2578	7.36065	7.27655	7.75862	6.70008	7.37637	P	M	P	P	P	P	M	P	P	P	noncoding	TCONS_00029699	XLOC_014372	LincRNAs identified by Cabili et al	452	chr22	-	38812751	38819028	AAGGGGCCTTAAAGTGCTGCCAAGCCCTCCTCATGCCACACCAGCTTCCCTGCAGAGCCA	intergenic
ASHGA5P021236	0.0381116	0.964458	478.497	496.13	8.67435	9.11743	736.314	509.959	414.112	303.059	517.208	496.13	604.309	494.548	442.761	451.636	399.232	478.497	8.89288	9.49454	8.62361	8.65	8.8329	9.0737	8.5687	9.04572	8.45368	9.32321	P	P	P	P	P	M	P	P	P	P	noncoding	NR_037646	TMX2-CTNND1	RefSeq	6251	chr11	+	57479994	57586652	ATGAAGAACCGCAGATCCACTCTCTCCTTCCTGCTTCCTCCTTGCTGTGGTGGCTGGGAT	exon sense-overlapping
ASHGA5P021236	0.0381116	0.964458	478.497	496.13	8.67435	9.11743	736.314	509.959	414.112	303.059	517.208	496.13	604.309	494.548	442.761	451.636	399.232	478.497	8.89288	9.49454	8.62361	8.65	8.8329	9.0737	8.5687	9.04572	8.45368	9.32321	P	P	P	P	P	M	P	P	P	P	noncoding	NR_037646	TMX2-CTNND1	RefSeq	6251	chr11	+	57479994	57586652	ATGAAGAACCGCAGATCCACTCTCTCCTTCCTGCTTCCTCCTTGCTGTGGTGGCTGGGAT	exon sense-overlapping
ASHGA5P021236	0.0381116	0.964458	478.497	496.13	8.67435	9.11743	736.314	509.959	414.112	303.059	517.208	496.13	604.309	494.548	442.761	451.636	399.232	478.497	8.89288	9.49454	8.62361	8.65	8.8329	9.0737	8.5687	9.04572	8.45368	9.32321	P	P	P	P	P	M	P	P	P	P	noncoding	NR_037646	TMX2-CTNND1	RefSeq	6251	chr11	+	57479994	57586652	ATGAAGAACCGCAGATCCACTCTCTCCTTCCTGCTTCCTCCTTGCTGTGGTGGCTGGGAT	exon sense-overlapping
ASHGA5P021236	0.0381116	0.964458	478.497	496.13	8.67435	9.11743	736.314	509.959	414.112	303.059	517.208	496.13	604.309	494.548	442.761	451.636	399.232	478.497	8.89288	9.49454	8.62361	8.65	8.8329	9.0737	8.5687	9.04572	8.45368	9.32321	P	P	P	P	P	M	P	P	P	P	noncoding	NR_037646	TMX2-CTNND1	RefSeq	6251	chr11	+	57479994	57586652	ATGAAGAACCGCAGATCCACTCTCTCCTTCCTGCTTCCTCCTTGCTGTGGTGGCTGGGAT	exon sense-overlapping
ASHGA5P021236	0.0381116	0.964458	478.497	496.13	8.67435	9.11743	736.314	509.959	414.112	303.059	517.208	496.13	604.309	494.548	442.761	451.636	399.232	478.497	8.89288	9.49454	8.62361	8.65	8.8329	9.0737	8.5687	9.04572	8.45368	9.32321	P	P	P	P	P	M	P	P	P	P	noncoding	NR_037646	TMX2-CTNND1	RefSeq	6251	chr11	+	57479994	57586652	ATGAAGAACCGCAGATCCACTCTCTCCTTCCTGCTTCCTCCTTGCTGTGGTGGCTGGGAT	exon sense-overlapping
ASHGA5P021236	0.0381116	0.964458	478.497	496.13	8.67435	9.11743	736.314	509.959	414.112	303.059	517.208	496.13	604.309	494.548	442.761	451.636	399.232	478.497	8.89288	9.49454	8.62361	8.65	8.8329	9.0737	8.5687	9.04572	8.45368	9.32321	P	P	P	P	P	M	P	P	P	P	noncoding	NR_037646	TMX2-CTNND1	RefSeq	6251	chr11	+	57479994	57586652	ATGAAGAACCGCAGATCCACTCTCTCCTTCCTGCTTCCTCCTTGCTGTGGTGGCTGGGAT	exon sense-overlapping
ASHGA5P021236	0.0381116	0.964458	478.497	496.13	8.67435	9.11743	736.314	509.959	414.112	303.059	517.208	496.13	604.309	494.548	442.761	451.636	399.232	478.497	8.89288	9.49454	8.62361	8.65	8.8329	9.0737	8.5687	9.04572	8.45368	9.32321	P	P	P	P	P	M	P	P	P	P	noncoding	NR_037646	TMX2-CTNND1	RefSeq	6251	chr11	+	57479994	57586652	ATGAAGAACCGCAGATCCACTCTCTCCTTCCTGCTTCCTCCTTGCTGTGGTGGCTGGGAT	exon sense-overlapping
ASHGA5P021236	0.0381116	0.964458	478.497	496.13	8.67435	9.11743	736.314	509.959	414.112	303.059	517.208	496.13	604.309	494.548	442.761	451.636	399.232	478.497	8.89288	9.49454	8.62361	8.65	8.8329	9.0737	8.5687	9.04572	8.45368	9.32321	P	P	P	P	P	M	P	P	P	P	noncoding	NR_037646	TMX2-CTNND1	RefSeq	6251	chr11	+	57479994	57586652	ATGAAGAACCGCAGATCCACTCTCTCCTTCCTGCTTCCTCCTTGCTGTGGTGGCTGGGAT	exon sense-overlapping
ASHGA5P021236	0.0381116	0.964458	478.497	496.13	8.67435	9.11743	736.314	509.959	414.112	303.059	517.208	496.13	604.309	494.548	442.761	451.636	399.232	478.497	8.89288	9.49454	8.62361	8.65	8.8329	9.0737	8.5687	9.04572	8.45368	9.32321	P	P	P	P	P	M	P	P	P	P	noncoding	NR_037646	TMX2-CTNND1	RefSeq	6251	chr11	+	57479994	57586652	ATGAAGAACCGCAGATCCACTCTCTCCTTCCTGCTTCCTCCTTGCTGTGGTGGCTGGGAT	exon sense-overlapping
ASHGA5P021236	0.0381116	0.964458	478.497	496.13	8.67435	9.11743	736.314	509.959	414.112	303.059	517.208	496.13	604.309	494.548	442.761	451.636	399.232	478.497	8.89288	9.49454	8.62361	8.65	8.8329	9.0737	8.5687	9.04572	8.45368	9.32321	P	P	P	P	P	M	P	P	P	P	noncoding	NR_037646	TMX2-CTNND1	RefSeq	6251	chr11	+	57479994	57586652	ATGAAGAACCGCAGATCCACTCTCTCCTTCCTGCTTCCTCCTTGCTGTGGTGGCTGGGAT	exon sense-overlapping
ASHGA5P021236	0.0381116	0.964458	478.497	496.13	8.67435	9.11743	736.314	509.959	414.112	303.059	517.208	496.13	604.309	494.548	442.761	451.636	399.232	478.497	8.89288	9.49454	8.62361	8.65	8.8329	9.0737	8.5687	9.04572	8.45368	9.32321	P	P	P	P	P	M	P	P	P	P	noncoding	NR_037646	TMX2-CTNND1	RefSeq	6251	chr11	+	57479994	57586652	ATGAAGAACCGCAGATCCACTCTCTCCTTCCTGCTTCCTCCTTGCTGTGGTGGCTGGGAT	exon sense-overlapping
ASHGA5P021236	0.0381116	0.964458	478.497	496.13	8.67435	9.11743	736.314	509.959	414.112	303.059	517.208	496.13	604.309	494.548	442.761	451.636	399.232	478.497	8.89288	9.49454	8.62361	8.65	8.8329	9.0737	8.5687	9.04572	8.45368	9.32321	P	P	P	P	P	M	P	P	P	P	noncoding	NR_037646	TMX2-CTNND1	RefSeq	6251	chr11	+	57479994	57586652	ATGAAGAACCGCAGATCCACTCTCTCCTTCCTGCTTCCTCCTTGCTGTGGTGGCTGGGAT	exon sense-overlapping
ASHGA5P021236	0.0381116	0.964458	478.497	496.13	8.67435	9.11743	736.314	509.959	414.112	303.059	517.208	496.13	604.309	494.548	442.761	451.636	399.232	478.497	8.89288	9.49454	8.62361	8.65	8.8329	9.0737	8.5687	9.04572	8.45368	9.32321	P	P	P	P	P	M	P	P	P	P	noncoding	NR_037646	TMX2-CTNND1	RefSeq	6251	chr11	+	57479994	57586652	ATGAAGAACCGCAGATCCACTCTCTCCTTCCTGCTTCCTCCTTGCTGTGGTGGCTGGGAT	exon sense-overlapping
ASHGA5P021236	0.0381116	0.964458	478.497	496.13	8.67435	9.11743	736.314	509.959	414.112	303.059	517.208	496.13	604.309	494.548	442.761	451.636	399.232	478.497	8.89288	9.49454	8.62361	8.65	8.8329	9.0737	8.5687	9.04572	8.45368	9.32321	P	P	P	P	P	M	P	P	P	P	noncoding	NR_037646	TMX2-CTNND1	RefSeq	6251	chr11	+	57479994	57586652	ATGAAGAACCGCAGATCCACTCTCTCCTTCCTGCTTCCTCCTTGCTGTGGTGGCTGGGAT	exon sense-overlapping
ASHGA5P021236	0.0381116	0.964458	478.497	496.13	8.67435	9.11743	736.314	509.959	414.112	303.059	517.208	496.13	604.309	494.548	442.761	451.636	399.232	478.497	8.89288	9.49454	8.62361	8.65	8.8329	9.0737	8.5687	9.04572	8.45368	9.32321	P	P	P	P	P	M	P	P	P	P	noncoding	NR_037646	TMX2-CTNND1	RefSeq	6251	chr11	+	57479994	57586652	ATGAAGAACCGCAGATCCACTCTCTCCTTCCTGCTTCCTCCTTGCTGTGGTGGCTGGGAT	exon sense-overlapping
ASHGA5P021236	0.0381116	0.964458	478.497	496.13	8.67435	9.11743	736.314	509.959	414.112	303.059	517.208	496.13	604.309	494.548	442.761	451.636	399.232	478.497	8.89288	9.49454	8.62361	8.65	8.8329	9.0737	8.5687	9.04572	8.45368	9.32321	P	P	P	P	P	M	P	P	P	P	noncoding	NR_037646	TMX2-CTNND1	RefSeq	6251	chr11	+	57479994	57586652	ATGAAGAACCGCAGATCCACTCTCTCCTTCCTGCTTCCTCCTTGCTGTGGTGGCTGGGAT	exon sense-overlapping
ASHGA5P021236	0.0381116	0.964458	478.497	496.13	8.67435	9.11743	736.314	509.959	414.112	303.059	517.208	496.13	604.309	494.548	442.761	451.636	399.232	478.497	8.89288	9.49454	8.62361	8.65	8.8329	9.0737	8.5687	9.04572	8.45368	9.32321	P	P	P	P	P	M	P	P	P	P	noncoding	NR_037646	TMX2-CTNND1	RefSeq	6251	chr11	+	57479994	57586652	ATGAAGAACCGCAGATCCACTCTCTCCTTCCTGCTTCCTCCTTGCTGTGGTGGCTGGGAT	exon sense-overlapping
ASHGA5P021236	0.0381116	0.964458	478.497	496.13	8.67435	9.11743	736.314	509.959	414.112	303.059	517.208	496.13	604.309	494.548	442.761	451.636	399.232	478.497	8.89288	9.49454	8.62361	8.65	8.8329	9.0737	8.5687	9.04572	8.45368	9.32321	P	P	P	P	P	M	P	P	P	P	noncoding	NR_037646	TMX2-CTNND1	RefSeq	6251	chr11	+	57479994	57586652	ATGAAGAACCGCAGATCCACTCTCTCCTTCCTGCTTCCTCCTTGCTGTGGTGGCTGGGAT	exon sense-overlapping
ASHGA5P021236	0.0381116	0.964458	478.497	496.13	8.67435	9.11743	736.314	509.959	414.112	303.059	517.208	496.13	604.309	494.548	442.761	451.636	399.232	478.497	8.89288	9.49454	8.62361	8.65	8.8329	9.0737	8.5687	9.04572	8.45368	9.32321	P	P	P	P	P	M	P	P	P	P	noncoding	NR_037646	TMX2-CTNND1	RefSeq	6251	chr11	+	57479994	57586652	ATGAAGAACCGCAGATCCACTCTCTCCTTCCTGCTTCCTCCTTGCTGTGGTGGCTGGGAT	exon sense-overlapping
ASHGA5P021236	0.0381116	0.964458	478.497	496.13	8.67435	9.11743	736.314	509.959	414.112	303.059	517.208	496.13	604.309	494.548	442.761	451.636	399.232	478.497	8.89288	9.49454	8.62361	8.65	8.8329	9.0737	8.5687	9.04572	8.45368	9.32321	P	P	P	P	P	M	P	P	P	P	noncoding	NR_037646	TMX2-CTNND1	RefSeq	6251	chr11	+	57479994	57586652	ATGAAGAACCGCAGATCCACTCTCTCCTTCCTGCTTCCTCCTTGCTGTGGTGGCTGGGAT	exon sense-overlapping
ASHGA5P021236	0.0381116	0.964458	478.497	496.13	8.67435	9.11743	736.314	509.959	414.112	303.059	517.208	496.13	604.309	494.548	442.761	451.636	399.232	478.497	8.89288	9.49454	8.62361	8.65	8.8329	9.0737	8.5687	9.04572	8.45368	9.32321	P	P	P	P	P	M	P	P	P	P	noncoding	NR_037646	TMX2-CTNND1	RefSeq	6251	chr11	+	57479994	57586652	ATGAAGAACCGCAGATCCACTCTCTCCTTCCTGCTTCCTCCTTGCTGTGGTGGCTGGGAT	exon sense-overlapping
ASHGA5P021236	0.0381116	0.964458	478.497	496.13	8.67435	9.11743	736.314	509.959	414.112	303.059	517.208	496.13	604.309	494.548	442.761	451.636	399.232	478.497	8.89288	9.49454	8.62361	8.65	8.8329	9.0737	8.5687	9.04572	8.45368	9.32321	P	P	P	P	P	M	P	P	P	P	noncoding	NR_037646	TMX2-CTNND1	RefSeq	6251	chr11	+	57479994	57586652	ATGAAGAACCGCAGATCCACTCTCTCCTTCCTGCTTCCTCCTTGCTGTGGTGGCTGGGAT	exon sense-overlapping
ASHGA5P021236	0.0381116	0.964458	478.497	496.13	8.67435	9.11743	736.314	509.959	414.112	303.059	517.208	496.13	604.309	494.548	442.761	451.636	399.232	478.497	8.89288	9.49454	8.62361	8.65	8.8329	9.0737	8.5687	9.04572	8.45368	9.32321	P	P	P	P	P	M	P	P	P	P	noncoding	NR_037646	TMX2-CTNND1	RefSeq	6251	chr11	+	57479994	57586652	ATGAAGAACCGCAGATCCACTCTCTCCTTCCTGCTTCCTCCTTGCTGTGGTGGCTGGGAT	exon sense-overlapping
ASHGA5P021236	0.0381116	0.964458	478.497	496.13	8.67435	9.11743	736.314	509.959	414.112	303.059	517.208	496.13	604.309	494.548	442.761	451.636	399.232	478.497	8.89288	9.49454	8.62361	8.65	8.8329	9.0737	8.5687	9.04572	8.45368	9.32321	P	P	P	P	P	M	P	P	P	P	noncoding	NR_037646	TMX2-CTNND1	RefSeq	6251	chr11	+	57479994	57586652	ATGAAGAACCGCAGATCCACTCTCTCCTTCCTGCTTCCTCCTTGCTGTGGTGGCTGGGAT	exon sense-overlapping
ASHGA5P021236	0.0381116	0.964458	478.497	496.13	8.67435	9.11743	736.314	509.959	414.112	303.059	517.208	496.13	604.309	494.548	442.761	451.636	399.232	478.497	8.89288	9.49454	8.62361	8.65	8.8329	9.0737	8.5687	9.04572	8.45368	9.32321	P	P	P	P	P	M	P	P	P	P	noncoding	NR_037646	TMX2-CTNND1	RefSeq	6251	chr11	+	57479994	57586652	ATGAAGAACCGCAGATCCACTCTCTCCTTCCTGCTTCCTCCTTGCTGTGGTGGCTGGGAT	intron sense-overlapping
ASHGA5P021236	0.0381116	0.964458	478.497	496.13	8.67435	9.11743	736.314	509.959	414.112	303.059	517.208	496.13	604.309	494.548	442.761	451.636	399.232	478.497	8.89288	9.49454	8.62361	8.65	8.8329	9.0737	8.5687	9.04572	8.45368	9.32321	P	P	P	P	P	M	P	P	P	P	noncoding	NR_037646	TMX2-CTNND1	RefSeq	6251	chr11	+	57479994	57586652	ATGAAGAACCGCAGATCCACTCTCTCCTTCCTGCTTCCTCCTTGCTGTGGTGGCTGGGAT	intronic antisense
ASHGA5P038942	0.0399927	0.963581	739.275	767.216	9.2199	9.71199	1194.95	907.994	822.4	394.249	516.483	767.216	1260.69	548.449	601.098	512.724	773.412	739.275	9.93846	10.2468	8.77071	9.49535	9.24944	10.0502	8.75215	9.44736	9.38872	9.32027	P	P	P	P	P	P	P	P	P	P	noncoding	ENST00000563632	RP11-757F18.5	GENCODE	1937	chr3	+	111852269	111854206	GGATTTTTGTATTATCCTTGTATTTGATGGTTGTTTCCAGTTTGGTCACTCATCTGTTTG	bidirectional
ASHGA5P038942	0.0399927	0.963581	739.275	767.216	9.2199	9.71199	1194.95	907.994	822.4	394.249	516.483	767.216	1260.69	548.449	601.098	512.724	773.412	739.275	9.93846	10.2468	8.77071	9.49535	9.24944	10.0502	8.75215	9.44736	9.38872	9.32027	P	P	P	P	P	P	P	P	P	P	noncoding	ENST00000563632	RP11-757F18.5	GENCODE	1937	chr3	+	111852269	111854206	GGATTTTTGTATTATCCTTGTATTTGATGGTTGTTTCCAGTTTGGTCACTCATCTGTTTG	bidirectional
ASHGA5P038942	0.0399927	0.963581	739.275	767.216	9.2199	9.71199	1194.95	907.994	822.4	394.249	516.483	767.216	1260.69	548.449	601.098	512.724	773.412	739.275	9.93846	10.2468	8.77071	9.49535	9.24944	10.0502	8.75215	9.44736	9.38872	9.32027	P	P	P	P	P	P	P	P	P	P	noncoding	ENST00000563632	RP11-757F18.5	GENCODE	1937	chr3	+	111852269	111854206	GGATTTTTGTATTATCCTTGTATTTGATGGTTGTTTCCAGTTTGGTCACTCATCTGTTTG	bidirectional
ASHGA5P031153	0.00768017	0.961577	124.777	129.763	6.77294	7.15873	178.673	150.526	96.0173	92.0247	131.576	129.763	134.85	127.62	83.8273	135.516	142.073	124.777	6.74497	7.35578	6.74094	6.91497	6.50787	7.00557	6.89169	7.26457	6.9792	7.25275	P	P	P	P	P	P	P	P	P	P	noncoding	ENST00000563124	RP11-305A4.3	GENCODE	2085	chr16	-	49954640	49958065	ACAAACTCTCAACTCTGTCAGAAAATGGGCTGTGTCTGTGCCTCTCTCTCTTTCCTAGAA	intergenic
ASHGA5P028495	0.0276684	0.961284	4479.02	4659.41	11.8474	12.3829	5322.8	6768.11	4154.33	2734.18	4317.64	4659.41	5284.05	5905.57	4264.08	4078.97	2862.41	4479.02	12.0129	12.4057	12.2531	12.482	11.9881	12.3387	11.695	12.2728	11.288	12.4153	P	P	P	P	P	P	P	P	P	M	noncoding	TCONS_00010587	XLOC_005110	LincRNAs identified by Cabili et al	982	chr5	-	180257007	180258290	AGATGGAGAGACCAGTTGATCGGTCACACAAGCTGTTCCACGATAATTCTTGTGTCAGAA	intergenic
ASHGA5P042300	0.0336949	0.961269	7053.83	7338.04	12.3325	13.028	9747.17	5595.71	7404.19	4209.64	9733.47	7338.04	12228.5	3898.91	5331.37	3457.19	10353.2	7053.83	13.2071	13.3209	11.6187	12.1721	12.3134	13.177	11.4433	12.8742	13.0799	13.596	P	P	P	P	P	P	P	P	P	P	noncoding	NR_026790	HCG11	RefSeq	5688	chr6	+	26521933	26527612	CAATGCTTTTATCTAGAGGCGTGTTGTCATTTTTGTCTTCTATGAAATTTTTGTCCCAAG	intergenic
ASHGA5P043738	0.0328548	0.958593	77.913	81.2785	6.10054	6.44316	118.028	94.0259	63.8851	53.401	77.0526	81.2785	102.47	77.1273	51.8187	64.0241	94.1254	77.913	6.34285	6.69417	6.05602	6.25476	5.82454	6.42145	5.86968	6.41402	6.40963	6.43142	P	P	P	M	P	P	P	P	P	P	noncoding	uc010lco.3	BC110795	UCSC_knowngene	1969	chr7	+	74912421	74918383	CTGCTGCTCTCACGGAAACCCTGTCCTGCTTCTCACACTGACATCTGCTCTCTAATCACA	intergenic
ASHGA5P018045	0.0384651	0.955833	48.2051	50.4325	5.46441	5.70995	58.4356	41.5372	67.7939	29.8372	54.5588	50.4325	41.5827	35.6256	66.4633	44.2531	53.1008	48.2051	5.11007	5.58066	5.05452	5.13276	6.17809	6.50669	5.37628	5.41881	5.6031	5.91083	P	P	P	P	P	P	P	P	P	P	noncoding	NR_027432	LOC219347	RefSeq	3735	chr10	-	81805988	81838949	TTCGCAGGTGGATCTCCCATTAACCAGTCATAATGAAGTAAGAACAAGAAGATGGGGAAG	natural antisense
ASHGA5P018045	0.0384651	0.955833	48.2051	50.4325	5.46441	5.70995	58.4356	41.5372	67.7939	29.8372	54.5588	50.4325	41.5827	35.6256	66.4633	44.2531	53.1008	48.2051	5.11007	5.58066	5.05452	5.13276	6.17809	6.50669	5.37628	5.41881	5.6031	5.91083	P	P	P	P	P	P	P	P	P	P	noncoding	NR_027432	LOC219347	RefSeq	3735	chr10	-	81805988	81838949	TTCGCAGGTGGATCTCCCATTAACCAGTCATAATGAAGTAAGAACAAGAAGATGGGGAAG	natural antisense
ASHGA5P018045	0.0384651	0.955833	48.2051	50.4325	5.46441	5.70995	58.4356	41.5372	67.7939	29.8372	54.5588	50.4325	41.5827	35.6256	66.4633	44.2531	53.1008	48.2051	5.11007	5.58066	5.05452	5.13276	6.17809	6.50669	5.37628	5.41881	5.6031	5.91083	P	P	P	P	P	P	P	P	P	P	noncoding	NR_027432	LOC219347	RefSeq	3735	chr10	-	81805988	81838949	TTCGCAGGTGGATCTCCCATTAACCAGTCATAATGAAGTAAGAACAAGAAGATGGGGAAG	natural antisense
ASHGA5P018045	0.0384651	0.955833	48.2051	50.4325	5.46441	5.70995	58.4356	41.5372	67.7939	29.8372	54.5588	50.4325	41.5827	35.6256	66.4633	44.2531	53.1008	48.2051	5.11007	5.58066	5.05452	5.13276	6.17809	6.50669	5.37628	5.41881	5.6031	5.91083	P	P	P	P	P	P	P	P	P	P	noncoding	NR_027432	LOC219347	RefSeq	3735	chr10	-	81805988	81838949	TTCGCAGGTGGATCTCCCATTAACCAGTCATAATGAAGTAAGAACAAGAAGATGGGGAAG	natural antisense
ASHGA5P018045	0.0384651	0.955833	48.2051	50.4325	5.46441	5.70995	58.4356	41.5372	67.7939	29.8372	54.5588	50.4325	41.5827	35.6256	66.4633	44.2531	53.1008	48.2051	5.11007	5.58066	5.05452	5.13276	6.17809	6.50669	5.37628	5.41881	5.6031	5.91083	P	P	P	P	P	P	P	P	P	P	noncoding	NR_027432	LOC219347	RefSeq	3735	chr10	-	81805988	81838949	TTCGCAGGTGGATCTCCCATTAACCAGTCATAATGAAGTAAGAACAAGAAGATGGGGAAG	natural antisense
ASHGA5P018045	0.0384651	0.955833	48.2051	50.4325	5.46441	5.70995	58.4356	41.5372	67.7939	29.8372	54.5588	50.4325	41.5827	35.6256	66.4633	44.2531	53.1008	48.2051	5.11007	5.58066	5.05452	5.13276	6.17809	6.50669	5.37628	5.41881	5.6031	5.91083	P	P	P	P	P	P	P	P	P	P	noncoding	NR_027432	LOC219347	RefSeq	3735	chr10	-	81805988	81838949	TTCGCAGGTGGATCTCCCATTAACCAGTCATAATGAAGTAAGAACAAGAAGATGGGGAAG	natural antisense
ASHGA5P018045	0.0384651	0.955833	48.2051	50.4325	5.46441	5.70995	58.4356	41.5372	67.7939	29.8372	54.5588	50.4325	41.5827	35.6256	66.4633	44.2531	53.1008	48.2051	5.11007	5.58066	5.05452	5.13276	6.17809	6.50669	5.37628	5.41881	5.6031	5.91083	P	P	P	P	P	P	P	P	P	P	noncoding	NR_027432	LOC219347	RefSeq	3735	chr10	-	81805988	81838949	TTCGCAGGTGGATCTCCCATTAACCAGTCATAATGAAGTAAGAACAAGAAGATGGGGAAG	natural antisense
ASHGA5P018045	0.0384651	0.955833	48.2051	50.4325	5.46441	5.70995	58.4356	41.5372	67.7939	29.8372	54.5588	50.4325	41.5827	35.6256	66.4633	44.2531	53.1008	48.2051	5.11007	5.58066	5.05452	5.13276	6.17809	6.50669	5.37628	5.41881	5.6031	5.91083	P	P	P	P	P	P	P	P	P	P	noncoding	NR_027432	LOC219347	RefSeq	3735	chr10	-	81805988	81838949	TTCGCAGGTGGATCTCCCATTAACCAGTCATAATGAAGTAAGAACAAGAAGATGGGGAAG	natural antisense
ASHGA5P054706	0.0173439	0.952734	286.421	300.631	7.9246	8.42143	290.262	317.704	320.947	211.946	362.296	300.631	275.761	204.175	337.787	223.046	391.338	286.422	7.77395	8.09145	7.38614	7.98413	8.46038	8.70144	7.57543	8.521	8.42712	8.80915	P	P	P	P	P	P	P	P	P	P	noncoding	TCONS_00006375	XLOC_002995	LincRNAs identified by Cabili et al	543	chr3	+	195362628	195363268	CTCGGGCCAGGTGACCTTTATGGCGGCGCCTTCTGTCCCTGGTCGCTTTTCCACTGAATG	intron sense-overlapping
ASHGA5P016090	0.0314433	0.951825	109.563	115.109	6.59501	7.00373	129.029	143.363	95.9638	95.6833	111.504	115.109	123.977	97.7221	80.7093	106.11	139.298	109.563	6.62478	6.84034	6.37925	6.84571	6.45745	7.00513	6.56493	7.33019	6.94864	6.99726	P	P	P	P	P	P	P	P	P	P	noncoding	ENST00000426661	FAM197Y8	GENCODE	2340	chrY	-	9185119	9193010	GGCATCCTCGCTTCAAAGGATTCCTCTGCCTGCTGATGCTGCTTTTCCCCCACATGAGGA	intergenic
ASHGA5P031872	0.0403944	0.948466	527.044	555.68	8.72777	9.30119	662	678.456	625.921	422.626	389.399	555.68	632.346	324.346	825.401	533.458	319.669	527.044	8.96273	9.33325	8.0257	9.06713	9.70878	9.64499	8.80915	9.54843	8.13251	8.91213	P	P	P	P	P	P	P	P	P	P	noncoding	ENST00000571975	RP11-96D1.10	GENCODE	3022	chr16	+	68258615	68261637	TTGGGCATCATATGGCTAATCACTCAGAGGTCACTAATCACTCTCCCTTTTCTTGTTTTT	exon sense-overlapping
ASHGA5P031872	0.0403944	0.948466	527.044	555.68	8.72777	9.30119	662	678.456	625.921	422.626	389.399	555.68	632.346	324.346	825.401	533.458	319.669	527.044	8.96273	9.33325	8.0257	9.06713	9.70878	9.64499	8.80915	9.54843	8.13251	8.91213	P	P	P	P	P	P	P	P	P	P	noncoding	ENST00000571975	RP11-96D1.10	GENCODE	3022	chr16	+	68258615	68261637	TTGGGCATCATATGGCTAATCACTCAGAGGTCACTAATCACTCTCCCTTTTCTTGTTTTT	exon sense-overlapping
ASHGA5P031872	0.0403944	0.948466	527.044	555.68	8.72777	9.30119	662	678.456	625.921	422.626	389.399	555.68	632.346	324.346	825.401	533.458	319.669	527.044	8.96273	9.33325	8.0257	9.06713	9.70878	9.64499	8.80915	9.54843	8.13251	8.91213	P	P	P	P	P	P	P	P	P	P	noncoding	ENST00000571975	RP11-96D1.10	GENCODE	3022	chr16	+	68258615	68261637	TTGGGCATCATATGGCTAATCACTCAGAGGTCACTAATCACTCTCCCTTTTCTTGTTTTT	exon sense-overlapping
ASHGA5P018682	0.0414136	0.944803	3329.4	3523.91	11.3391	11.9707	4972.81	4050.87	3501.06	1986.7	3108.12	3523.91	5166.27	2121.89	4065.99	3383.59	1909.27	3329.4	11.9813	12.3058	10.7117	11.7041	11.9202	12.0805	11.4028	11.8104	10.6795	11.9528	P	P	P	P	P	P	P	P	P	P	noncoding	ENST00000456450	AC010907.2	GENCODE	693	chr2	-	3650986	3651832	GCCTTCCTCGGGCGTTACAACTTGGAAAACAAGACCAGGCGCAGTGGCTCACACCTGTAA	intronic antisense
ASHGA5P018682	0.0414136	0.944803	3329.4	3523.91	11.3391	11.9707	4972.81	4050.87	3501.06	1986.7	3108.12	3523.91	5166.27	2121.89	4065.99	3383.59	1909.27	3329.4	11.9813	12.3058	10.7117	11.7041	11.9202	12.0805	11.4028	11.8104	10.6795	11.9528	P	P	P	P	P	P	P	P	P	P	noncoding	ENST00000456450	AC010907.2	GENCODE	693	chr2	-	3650986	3651832	GCCTTCCTCGGGCGTTACAACTTGGAAAACAAGACCAGGCGCAGTGGCTCACACCTGTAA	intronic antisense
ASHGA5P018682	0.0414136	0.944803	3329.4	3523.91	11.3391	11.9707	4972.81	4050.87	3501.06	1986.7	3108.12	3523.91	5166.27	2121.89	4065.99	3383.59	1909.27	3329.4	11.9813	12.3058	10.7117	11.7041	11.9202	12.0805	11.4028	11.8104	10.6795	11.9528	P	P	P	P	P	P	P	P	P	P	noncoding	ENST00000456450	AC010907.2	GENCODE	693	chr2	-	3650986	3651832	GCCTTCCTCGGGCGTTACAACTTGGAAAACAAGACCAGGCGCAGTGGCTCACACCTGTAA	intronic antisense
ASHGA5P018682	0.0414136	0.944803	3329.4	3523.91	11.3391	11.9707	4972.81	4050.87	3501.06	1986.7	3108.12	3523.91	5166.27	2121.89	4065.99	3383.59	1909.27	3329.4	11.9813	12.3058	10.7117	11.7041	11.9202	12.0805	11.4028	11.8104	10.6795	11.9528	P	P	P	P	P	P	P	P	P	P	noncoding	ENST00000456450	AC010907.2	GENCODE	693	chr2	-	3650986	3651832	GCCTTCCTCGGGCGTTACAACTTGGAAAACAAGACCAGGCGCAGTGGCTCACACCTGTAA	intronic antisense
ASHGA5P018682	0.0414136	0.944803	3329.4	3523.91	11.3391	11.9707	4972.81	4050.87	3501.06	1986.7	3108.12	3523.91	5166.27	2121.89	4065.99	3383.59	1909.27	3329.4	11.9813	12.3058	10.7117	11.7041	11.9202	12.0805	11.4028	11.8104	10.6795	11.9528	P	P	P	P	P	P	P	P	P	P	noncoding	ENST00000456450	AC010907.2	GENCODE	693	chr2	-	3650986	3651832	GCCTTCCTCGGGCGTTACAACTTGGAAAACAAGACCAGGCGCAGTGGCTCACACCTGTAA	intronic antisense
ASHGA5P018682	0.0414136	0.944803	3329.4	3523.91	11.3391	11.9707	4972.81	4050.87	3501.06	1986.7	3108.12	3523.91	5166.27	2121.89	4065.99	3383.59	1909.27	3329.4	11.9813	12.3058	10.7117	11.7041	11.9202	12.0805	11.4028	11.8104	10.6795	11.9528	P	P	P	P	P	P	P	P	P	P	noncoding	ENST00000456450	AC010907.2	GENCODE	693	chr2	-	3650986	3651832	GCCTTCCTCGGGCGTTACAACTTGGAAAACAAGACCAGGCGCAGTGGCTCACACCTGTAA	natural antisense
ASHGA5P019822	0.0121769	0.936647	144.63	154.413	6.98717	7.40975	219.208	171.169	142.465	97.8717	141.349	154.413	165.977	122.717	112.601	152.619	169.237	144.63	7.051	7.65526	6.68647	7.09795	6.91027	7.56983	7.05346	7.36327	7.23465	7.36242	P	P	P	P	P	P	P	P	P	P	noncoding	NR_047515	SLC9B1	RefSeq	1489	chr4	-	103806204	103940896	ATTACAAATGTTTTGTTCTAGGTGCTGTCTCTCCTGCTGTTGTTGTCCCTTACATGATGG	exon sense-overlapping
ASHGA5P019822	0.0121769	0.936647	144.63	154.413	6.98717	7.40975	219.208	171.169	142.465	97.8717	141.349	154.413	165.977	122.717	112.601	152.619	169.237	144.63	7.051	7.65526	6.68647	7.09795	6.91027	7.56983	7.05346	7.36327	7.23465	7.36242	P	P	P	P	P	P	P	P	P	P	noncoding	NR_047515	SLC9B1	RefSeq	1489	chr4	-	103806204	103940896	ATTACAAATGTTTTGTTCTAGGTGCTGTCTCTCCTGCTGTTGTTGTCCCTTACATGATGG	exon sense-overlapping
ASHGA5P019822	0.0121769	0.936647	144.63	154.413	6.98717	7.40975	219.208	171.169	142.465	97.8717	141.349	154.413	165.977	122.717	112.601	152.619	169.237	144.63	7.051	7.65526	6.68647	7.09795	6.91027	7.56983	7.05346	7.36327	7.23465	7.36242	P	P	P	P	P	P	P	P	P	P	noncoding	NR_047515	SLC9B1	RefSeq	1489	chr4	-	103806204	103940896	ATTACAAATGTTTTGTTCTAGGTGCTGTCTCTCCTGCTGTTGTTGTCCCTTACATGATGG	natural antisense
ASHGA5P043054	0.0472166	0.9363	218.758	233.641	7.38914	7.98344	357.003	295.132	208.636	154.757	152.678	233.641	459.456	129.721	193.15	206.904	104.559	218.758	8.50591	8.4048	6.7608	7.86975	7.65423	8.09893	7.47031	8.06406	6.55446	7.47964	P	P	P	P	P	P	P	P	P	P	noncoding	ENST00000428414	SEPT7P2	GENCODE	1920	chr7	-	45763648	45808563	GAGCATTGAAGTTACCATAAGGGGCCTAGAAATACTCTGTATACCTATATAGTGCTCTAG	intergenic
ASHGA5P042569	0.0127106	0.936093	174.337	186.239	7.23516	7.68293	222.072	272.258	146.975	131.427	158.461	186.239	242.262	183.438	140.208	160.155	145.62	174.337	7.5961	7.67762	7.24413	7.76159	7.20494	7.60839	7.1149	7.82921	7.01576	7.53786	P	P	P	P	P	P	P	P	P	P	noncoding	TCONS_00020777	XLOC_010065	LincRNAs identified by Cabili et al	406	chr12	-	49194955	49204315	AACTGACTGAAAACCAAATTAAAAGAGGAGCCTTGCTCCCTTCCTTGTGCTCAGCGTTGA	intergenic
ASHGA5P018457	0.0322446	0.934051	72.6768	77.8082	6.02286	6.33463	140.52	69.3711	56.6138	46.1189	76.4175	77.8082	100.125	55.1828	59.8629	74.9577	73.2552	72.6768	6.30997	6.97146	5.62273	5.84682	6.03523	6.25488	6.08334	6.17892	6.06303	6.42106	P	P	P	P	P	P	P	P	P	P	noncoding	uc002yli.1	AK124194	UCSC_knowngene	2908	chr21	+	25801053	25862621	ATTTTAGCAAGCAAATGGAAGAAGAAAGAGGAGAGTGGTGGTGTGTGCTTTCCCTTTAAT	intergenic
ASHGA5P029469	0.0197769	0.933989	170.191	182.22	7.15831	7.6886	164.125	179.766	190.012	140.628	236.568	182.22	136.303	121.217	136.445	277.117	179.874	170.191	6.76024	7.22416	6.66683	7.17313	7.16867	7.96689	7.87377	7.92457	7.32201	8.15425	P	P	P	P	P	P	P	P	P	P	noncoding	TCONS_00010297	XLOC_004775	LincRNAs identified by Cabili et al	528	chr5	-	34651581	34652810	AAACTCTGATATTGACCTCATTACTTCTCCCCGTTCTGCAGGCAGAAGACTGCTATGAGA	intergenic
ASHGA5P019849	0.0032541	0.931793	273.506	293.527	7.87862	8.33283	343.554	435.426	231.13	170.531	286.992	293.527	283.507	311.203	203.951	308.071	260.799	273.506	7.81575	8.34696	7.96824	8.4178	7.73831	8.24748	8.02698	8.20891	7.84381	8.44301	P	P	P	P	P	P	P	P	P	P	noncoding	NR_037913	RCHY1	RefSeq	4475	chr4	-	76404246	76439640	GTGAGTGTTTGGGATTTTAAAAATAATTAGGCTACAGATGTCCATTATGTATGCACTCTG	exon sense-overlapping
ASHGA5P019849	0.0032541	0.931793	273.506	293.527	7.87862	8.33283	343.554	435.426	231.13	170.531	286.992	293.527	283.507	311.203	203.951	308.071	260.799	273.506	7.81575	8.34696	7.96824	8.4178	7.73831	8.24748	8.02698	8.20891	7.84381	8.44301	P	P	P	P	P	P	P	P	P	P	noncoding	NR_037913	RCHY1	RefSeq	4475	chr4	-	76404246	76439640	GTGAGTGTTTGGGATTTTAAAAATAATTAGGCTACAGATGTCCATTATGTATGCACTCTG	exon sense-overlapping
ASHGA5P019849	0.0032541	0.931793	273.506	293.527	7.87862	8.33283	343.554	435.426	231.13	170.531	286.992	293.527	283.507	311.203	203.951	308.071	260.799	273.506	7.81575	8.34696	7.96824	8.4178	7.73831	8.24748	8.02698	8.20891	7.84381	8.44301	P	P	P	P	P	P	P	P	P	P	noncoding	NR_037913	RCHY1	RefSeq	4475	chr4	-	76404246	76439640	GTGAGTGTTTGGGATTTTAAAAATAATTAGGCTACAGATGTCCATTATGTATGCACTCTG	exon sense-overlapping
ASHGA5P030699	0.00855107	0.929127	109.484	117.835	6.59874	6.99837	188.691	118.024	97.0852	77.8325	107.542	117.835	142.374	100.885	81.7235	109.1	113.336	109.484	6.83016	7.43352	6.42001	6.58263	6.47166	7.0218	6.60308	7.0167	6.66878	6.9372	P	P	P	P	P	P	M	P	P	P	noncoding	uc010bls.1	LOC390660	UCSC_knowngene	2700	chr15	+	82619907	82623844	TTGGGAGTCATCTCATCTTTGTCTGGCTTGGCCTGTCTCCTTTCCTCTGTATCTTTGACC	intergenic
ASHGA5P058161	0.0360659	0.928439	281.373	303.06	7.91758	8.33529	280.723	545.63	260.577	162.852	265.521	303.06	312.397	328.337	268.92	283.88	213.331	281.373	7.94748	8.03552	8.04702	8.75061	8.12709	8.41888	7.90666	8.14329	7.55967	8.32814	P	P	P	P	P	P	P	P	P	P	noncoding	TCONS_00027184	XLOC_013222	LincRNAs identified by Cabili et al	1551	chr19	-	10762549	10764550	AGGCACAGAAGGGTCAGGTTGGCCATCCGCAGGCGTAGTTGCTAGGAAGGTTTGACAGAT	intergenic
ASHGA5P017955	0.0301818	0.9284	232.81	250.764	7.63992	8.09487	372.66	300.21	220.948	132.951	227.053	250.764	250.842	240.034	185.596	179.581	307.995	232.81	7.6412	8.45744	7.60979	7.89708	7.59509	8.185	7.27729	7.84303	8.07623	8.09181	P	P	P	P	P	P	P	P	P	P	noncoding	ENST00000447577	RP4-717I23.3	GENCODE	431	chr1	-	93730207	93806029	ACATTGGCTGTTTTCCTCACATTCCTCAAGCAGGAGGGCTCTGAGAGATTTCATTTCTGT	natural antisense
ASHGA5P019677	0.0486571	0.923512	177.196	191.872	7.25283	7.74852	251.651	231.604	162.01	139.845	174.251	191.872	200.099	239.658	158.963	136.494	150.768	177.196	7.32084	7.86903	7.60596	7.53192	7.36754	7.7427	6.902	7.91678	7.06783	7.68217	P	P	P	P	P	P	P	P	P	P	noncoding	ENST00000499732	NEAT1	GENCODE	1745	chr11	+	65190244	65192232	GCCCAGGGTGGTGGCAGTGCTCCTTTTGGACTTTTCTCTAGGTTTGGCGCTAAACTCTTC	intergenic
ASHGA5P045298	0.0426798	0.923174	62.2896	67.4733	5.80031	6.20543	89.6137	70.4781	58.3662	54.063	64.8457	67.4733	87.0819	65.152	50.0327	62.3371	46.8443	62.2896	6.11896	6.25356	5.84205	5.8687	5.77585	6.2985	5.83344	6.43332	5.43127	6.17308	P	P	P	P	P	P	P	P	P	P	noncoding	uc004ami.1	AK097447	UCSC_knowngene	2208	chr9	-	84545140	84592004	AGACACCTTTGCAGAAGAAAAAACAACTTCCTCTCTTCCTCTACTTCACTCTGGCAAGTT	natural antisense
ASHGA5P045298	0.0426798	0.923174	62.2896	67.4733	5.80031	6.20543	89.6137	70.4781	58.3662	54.063	64.8457	67.4733	87.0819	65.152	50.0327	62.3371	46.8443	62.2896	6.11896	6.25356	5.84205	5.8687	5.77585	6.2985	5.83344	6.43332	5.43127	6.17308	P	P	P	P	P	P	P	P	P	P	noncoding	uc004ami.1	AK097447	UCSC_knowngene	2208	chr9	-	84545140	84592004	AGACACCTTTGCAGAAGAAAAAACAACTTCCTCTCTTCCTCTACTTCACTCTGGCAAGTT	natural antisense
ASHGA5P034314	0.0486628	0.918548	1021.26	1111.82	9.62267	10.3484	1153.02	1427.56	1065.63	1074.98	837.929	1111.82	1242.7	943.712	1082.78	1465.78	371.349	1021.26	9.91581	10.1885	9.5604	10.1708	10.068	10.4071	10.2192	10.9141	8.34998	10.0614	P	P	P	P	P	P	P	P	P	P	noncoding	ENST00000569091	CTC-471J1.2	GENCODE	675	chr19	-	52561742	52566956	CTCAACCTAGAAGTCAGGAGTTTCAAGAGTAAACATTCAGTGTTGAATTAAAGAATCTGA	intergenic
ASHGA5P005909	0.0291278	0.914659	540.021	590.407	8.81639	9.30381	742.302	534.937	380.723	296.641	997.43	590.407	571.277	439.872	372.175	550.215	766.565	540.021	8.81014	9.50419	8.45198	8.7228	8.59402	8.95537	8.85386	9.0131	9.37195	10.3236	P	P	P	P	P	P	P	P	P	P	noncoding	ENST00000311237	ZNF826P	pseudogene	1843	chr19	-	20577387	20592757	TTAGAGAACTACAGACACCTGGTCTTCCTTGGGTATTGTTCTCTCCAAGCCAGAACTGAT
ASHGA5P022447	0.00970427	0.911366	7063.27	7750.2	12.4874	13.0481	12325.2	9505.94	5772.35	3355.11	7792.38	7750.2	10662.7	6979.27	4802.84	6647.04	6224.46	7063.27	12.9943	13.6657	12.4812	12.9819	12.1838	12.7862	12.4011	12.5483	12.3766	13.2582	P	P	P	P	P	P	P	P	P	P	noncoding	NR_037600	LOC100507217	RefSeq	1593	chr15	+	93426072	93441977	CTCGGACCCGGTGACTTAAGAGATTAAAATTAATTTGGTTGCTGTTGGTTCTGAACAAAT	exon sense-overlapping
ASHGA5P049643	0.00897218	0.910816	88.6046	97.2805	6.28984	6.74796	133.505	105.284	77.8925	84.7783	84.9429	97.2805	125.971	84.4129	68.2074	94.565	69.8663	88.6046	6.64659	6.89453	6.17878	6.41741	6.21796	6.7036	6.40767	7.14459	5.99818	6.57967	P	P	P	P	P	P	P	P	P	P	noncoding	ENST00000578423	CTD-2206N4.4	GENCODE	1726	chr17	+	37213304	37268492	AATGCTTCATGTTTTTCCTTGGTGTCTGTCTCTCCTATTTCCACCCATCTCTGCTGGAGA	natural antisense
ASHGA5P025951	0.0310851	0.90889	888.651	977.733	9.49509	10.07	881.109	1613.92	1115.59	672.891	605.16	977.733	1196.12	1085.58	802.383	896.746	462.425	888.651	9.85762	9.75969	9.75541	10.3401	9.67056	10.4635	9.52564	10.2165	8.66622	9.5701	P	P	P	P	P	P	P	P	P	P	noncoding	NR_047587	TMEM218	RefSeq	3651	chr11	-	124964265	124981659	GGAATCTGAGGTTCTCTGTCATTTTTTTATTCTTCGGTGCTGTGATCATCACATCAGTTC	exon sense-overlapping
ASHGA5P025951	0.0310851	0.90889	888.651	977.733	9.49509	10.07	881.109	1613.92	1115.59	672.891	605.16	977.733	1196.12	1085.58	802.383	896.746	462.425	888.651	9.85762	9.75969	9.75541	10.3401	9.67056	10.4635	9.52564	10.2165	8.66622	9.5701	P	P	P	P	P	P	P	P	P	P	noncoding	NR_047587	TMEM218	RefSeq	3651	chr11	-	124964265	124981659	GGAATCTGAGGTTCTCTGTCATTTTTTTATTCTTCGGTGCTGTGATCATCACATCAGTTC	exon sense-overlapping
ASHGA5P025951	0.0310851	0.90889	888.651	977.733	9.49509	10.07	881.109	1613.92	1115.59	672.891	605.16	977.733	1196.12	1085.58	802.383	896.746	462.425	888.651	9.85762	9.75969	9.75541	10.3401	9.67056	10.4635	9.52564	10.2165	8.66622	9.5701	P	P	P	P	P	P	P	P	P	P	noncoding	NR_047587	TMEM218	RefSeq	3651	chr11	-	124964265	124981659	GGAATCTGAGGTTCTCTGTCATTTTTTTATTCTTCGGTGCTGTGATCATCACATCAGTTC	exon sense-overlapping
ASHGA5P025951	0.0310851	0.90889	888.651	977.733	9.49509	10.07	881.109	1613.92	1115.59	672.891	605.16	977.733	1196.12	1085.58	802.383	896.746	462.425	888.651	9.85762	9.75969	9.75541	10.3401	9.67056	10.4635	9.52564	10.2165	8.66622	9.5701	P	P	P	P	P	P	P	P	P	P	noncoding	NR_047587	TMEM218	RefSeq	3651	chr11	-	124964265	124981659	GGAATCTGAGGTTCTCTGTCATTTTTTTATTCTTCGGTGCTGTGATCATCACATCAGTTC	exon sense-overlapping
ASHGA5P025951	0.0310851	0.90889	888.651	977.733	9.49509	10.07	881.109	1613.92	1115.59	672.891	605.16	977.733	1196.12	1085.58	802.383	896.746	462.425	888.651	9.85762	9.75969	9.75541	10.3401	9.67056	10.4635	9.52564	10.2165	8.66622	9.5701	P	P	P	P	P	P	P	P	P	P	noncoding	NR_047587	TMEM218	RefSeq	3651	chr11	-	124964265	124981659	GGAATCTGAGGTTCTCTGTCATTTTTTTATTCTTCGGTGCTGTGATCATCACATCAGTTC	exon sense-overlapping
ASHGA5P025951	0.0310851	0.90889	888.651	977.733	9.49509	10.07	881.109	1613.92	1115.59	672.891	605.16	977.733	1196.12	1085.58	802.383	896.746	462.425	888.651	9.85762	9.75969	9.75541	10.3401	9.67056	10.4635	9.52564	10.2165	8.66622	9.5701	P	P	P	P	P	P	P	P	P	P	noncoding	NR_047587	TMEM218	RefSeq	3651	chr11	-	124964265	124981659	GGAATCTGAGGTTCTCTGTCATTTTTTTATTCTTCGGTGCTGTGATCATCACATCAGTTC	exon sense-overlapping
ASHGA5P025951	0.0310851	0.90889	888.651	977.733	9.49509	10.07	881.109	1613.92	1115.59	672.891	605.16	977.733	1196.12	1085.58	802.383	896.746	462.425	888.651	9.85762	9.75969	9.75541	10.3401	9.67056	10.4635	9.52564	10.2165	8.66622	9.5701	P	P	P	P	P	P	P	P	P	P	noncoding	NR_047587	TMEM218	RefSeq	3651	chr11	-	124964265	124981659	GGAATCTGAGGTTCTCTGTCATTTTTTTATTCTTCGGTGCTGTGATCATCACATCAGTTC	exon sense-overlapping
ASHGA5P025951	0.0310851	0.90889	888.651	977.733	9.49509	10.07	881.109	1613.92	1115.59	672.891	605.16	977.733	1196.12	1085.58	802.383	896.746	462.425	888.651	9.85762	9.75969	9.75541	10.3401	9.67056	10.4635	9.52564	10.2165	8.66622	9.5701	P	P	P	P	P	P	P	P	P	P	noncoding	NR_047587	TMEM218	RefSeq	3651	chr11	-	124964265	124981659	GGAATCTGAGGTTCTCTGTCATTTTTTTATTCTTCGGTGCTGTGATCATCACATCAGTTC	exon sense-overlapping
ASHGA5P025951	0.0310851	0.90889	888.651	977.733	9.49509	10.07	881.109	1613.92	1115.59	672.891	605.16	977.733	1196.12	1085.58	802.383	896.746	462.425	888.651	9.85762	9.75969	9.75541	10.3401	9.67056	10.4635	9.52564	10.2165	8.66622	9.5701	P	P	P	P	P	P	P	P	P	P	noncoding	NR_047587	TMEM218	RefSeq	3651	chr11	-	124964265	124981659	GGAATCTGAGGTTCTCTGTCATTTTTTTATTCTTCGGTGCTGTGATCATCACATCAGTTC	exon sense-overlapping
ASHGA5P025951	0.0310851	0.90889	888.651	977.733	9.49509	10.07	881.109	1613.92	1115.59	672.891	605.16	977.733	1196.12	1085.58	802.383	896.746	462.425	888.651	9.85762	9.75969	9.75541	10.3401	9.67056	10.4635	9.52564	10.2165	8.66622	9.5701	P	P	P	P	P	P	P	P	P	P	noncoding	NR_047587	TMEM218	RefSeq	3651	chr11	-	124964265	124981659	GGAATCTGAGGTTCTCTGTCATTTTTTTATTCTTCGGTGCTGTGATCATCACATCAGTTC	exon sense-overlapping
ASHGA5P025951	0.0310851	0.90889	888.651	977.733	9.49509	10.07	881.109	1613.92	1115.59	672.891	605.16	977.733	1196.12	1085.58	802.383	896.746	462.425	888.651	9.85762	9.75969	9.75541	10.3401	9.67056	10.4635	9.52564	10.2165	8.66622	9.5701	P	P	P	P	P	P	P	P	P	P	noncoding	NR_047587	TMEM218	RefSeq	3651	chr11	-	124964265	124981659	GGAATCTGAGGTTCTCTGTCATTTTTTTATTCTTCGGTGCTGTGATCATCACATCAGTTC	exon sense-overlapping
ASHGA5P021378	0.0367531	0.908697	905.407	996.38	9.51419	10.1006	904.896	1666.61	1094.81	685.921	629.663	996.38	1269.16	1090.62	814.676	894.609	457.961	905.407	9.94403	9.8068	9.76215	10.3896	9.69036	10.4405	9.5244	10.2363	8.65	9.6298	P	P	P	P	P	P	P	P	P	P	noncoding	NR_047589	TMEM218	RefSeq	3720	chr11	-	124964265	124981604	CCATTGCCTGGTTCTCTGTCATTTTTTTATTCTTCGGTGCTGTGATCATCACATCAGTTC	exon sense-overlapping
ASHGA5P021378	0.0367531	0.908697	905.407	996.38	9.51419	10.1006	904.896	1666.61	1094.81	685.921	629.663	996.38	1269.16	1090.62	814.676	894.609	457.961	905.407	9.94403	9.8068	9.76215	10.3896	9.69036	10.4405	9.5244	10.2363	8.65	9.6298	P	P	P	P	P	P	P	P	P	P	noncoding	NR_047589	TMEM218	RefSeq	3720	chr11	-	124964265	124981604	CCATTGCCTGGTTCTCTGTCATTTTTTTATTCTTCGGTGCTGTGATCATCACATCAGTTC	exon sense-overlapping
ASHGA5P021378	0.0367531	0.908697	905.407	996.38	9.51419	10.1006	904.896	1666.61	1094.81	685.921	629.663	996.38	1269.16	1090.62	814.676	894.609	457.961	905.407	9.94403	9.8068	9.76215	10.3896	9.69036	10.4405	9.5244	10.2363	8.65	9.6298	P	P	P	P	P	P	P	P	P	P	noncoding	NR_047589	TMEM218	RefSeq	3720	chr11	-	124964265	124981604	CCATTGCCTGGTTCTCTGTCATTTTTTTATTCTTCGGTGCTGTGATCATCACATCAGTTC	exon sense-overlapping
ASHGA5P021378	0.0367531	0.908697	905.407	996.38	9.51419	10.1006	904.896	1666.61	1094.81	685.921	629.663	996.38	1269.16	1090.62	814.676	894.609	457.961	905.407	9.94403	9.8068	9.76215	10.3896	9.69036	10.4405	9.5244	10.2363	8.65	9.6298	P	P	P	P	P	P	P	P	P	P	noncoding	NR_047589	TMEM218	RefSeq	3720	chr11	-	124964265	124981604	CCATTGCCTGGTTCTCTGTCATTTTTTTATTCTTCGGTGCTGTGATCATCACATCAGTTC	exon sense-overlapping
ASHGA5P021378	0.0367531	0.908697	905.407	996.38	9.51419	10.1006	904.896	1666.61	1094.81	685.921	629.663	996.38	1269.16	1090.62	814.676	894.609	457.961	905.407	9.94403	9.8068	9.76215	10.3896	9.69036	10.4405	9.5244	10.2363	8.65	9.6298	P	P	P	P	P	P	P	P	P	P	noncoding	NR_047589	TMEM218	RefSeq	3720	chr11	-	124964265	124981604	CCATTGCCTGGTTCTCTGTCATTTTTTTATTCTTCGGTGCTGTGATCATCACATCAGTTC	exon sense-overlapping
ASHGA5P021378	0.0367531	0.908697	905.407	996.38	9.51419	10.1006	904.896	1666.61	1094.81	685.921	629.663	996.38	1269.16	1090.62	814.676	894.609	457.961	905.407	9.94403	9.8068	9.76215	10.3896	9.69036	10.4405	9.5244	10.2363	8.65	9.6298	P	P	P	P	P	P	P	P	P	P	noncoding	NR_047589	TMEM218	RefSeq	3720	chr11	-	124964265	124981604	CCATTGCCTGGTTCTCTGTCATTTTTTTATTCTTCGGTGCTGTGATCATCACATCAGTTC	exon sense-overlapping
ASHGA5P021378	0.0367531	0.908697	905.407	996.38	9.51419	10.1006	904.896	1666.61	1094.81	685.921	629.663	996.38	1269.16	1090.62	814.676	894.609	457.961	905.407	9.94403	9.8068	9.76215	10.3896	9.69036	10.4405	9.5244	10.2363	8.65	9.6298	P	P	P	P	P	P	P	P	P	P	noncoding	NR_047589	TMEM218	RefSeq	3720	chr11	-	124964265	124981604	CCATTGCCTGGTTCTCTGTCATTTTTTTATTCTTCGGTGCTGTGATCATCACATCAGTTC	exon sense-overlapping
ASHGA5P021378	0.0367531	0.908697	905.407	996.38	9.51419	10.1006	904.896	1666.61	1094.81	685.921	629.663	996.38	1269.16	1090.62	814.676	894.609	457.961	905.407	9.94403	9.8068	9.76215	10.3896	9.69036	10.4405	9.5244	10.2363	8.65	9.6298	P	P	P	P	P	P	P	P	P	P	noncoding	NR_047589	TMEM218	RefSeq	3720	chr11	-	124964265	124981604	CCATTGCCTGGTTCTCTGTCATTTTTTTATTCTTCGGTGCTGTGATCATCACATCAGTTC	exon sense-overlapping
ASHGA5P021378	0.0367531	0.908697	905.407	996.38	9.51419	10.1006	904.896	1666.61	1094.81	685.921	629.663	996.38	1269.16	1090.62	814.676	894.609	457.961	905.407	9.94403	9.8068	9.76215	10.3896	9.69036	10.4405	9.5244	10.2363	8.65	9.6298	P	P	P	P	P	P	P	P	P	P	noncoding	NR_047589	TMEM218	RefSeq	3720	chr11	-	124964265	124981604	CCATTGCCTGGTTCTCTGTCATTTTTTTATTCTTCGGTGCTGTGATCATCACATCAGTTC	exon sense-overlapping
ASHGA5P021378	0.0367531	0.908697	905.407	996.38	9.51419	10.1006	904.896	1666.61	1094.81	685.921	629.663	996.38	1269.16	1090.62	814.676	894.609	457.961	905.407	9.94403	9.8068	9.76215	10.3896	9.69036	10.4405	9.5244	10.2363	8.65	9.6298	P	P	P	P	P	P	P	P	P	P	noncoding	NR_047589	TMEM218	RefSeq	3720	chr11	-	124964265	124981604	CCATTGCCTGGTTCTCTGTCATTTTTTTATTCTTCGGTGCTGTGATCATCACATCAGTTC	exon sense-overlapping
ASHGA5P021378	0.0367531	0.908697	905.407	996.38	9.51419	10.1006	904.896	1666.61	1094.81	685.921	629.663	996.38	1269.16	1090.62	814.676	894.609	457.961	905.407	9.94403	9.8068	9.76215	10.3896	9.69036	10.4405	9.5244	10.2363	8.65	9.6298	P	P	P	P	P	P	P	P	P	P	noncoding	NR_047589	TMEM218	RefSeq	3720	chr11	-	124964265	124981604	CCATTGCCTGGTTCTCTGTCATTTTTTTATTCTTCGGTGCTGTGATCATCACATCAGTTC	exon sense-overlapping
ASHGA5P019848	0.0114338	0.908005	637.996	702.635	9.06648	9.57319	717.539	1218.67	601.702	359.135	616.134	702.635	664.787	772.892	414.654	673.2	664.445	637.996	9.03104	9.44848	9.26704	9.93078	8.7433	9.58602	9.12881	9.3018	9.16223	9.59885	P	P	P	P	P	P	P	P	P	P	noncoding	NR_037914	RCHY1	RefSeq	4471	chr4	-	76404246	76439640	GTATCACTGTGAAAACTGTGGAATTTGATTGGTCCAAAGGAAGATTTTTTCCATTGTTTG	exon sense-overlapping
ASHGA5P019848	0.0114338	0.908005	637.996	702.635	9.06648	9.57319	717.539	1218.67	601.702	359.135	616.134	702.635	664.787	772.892	414.654	673.2	664.445	637.996	9.03104	9.44848	9.26704	9.93078	8.7433	9.58602	9.12881	9.3018	9.16223	9.59885	P	P	P	P	P	P	P	P	P	P	noncoding	NR_037914	RCHY1	RefSeq	4471	chr4	-	76404246	76439640	GTATCACTGTGAAAACTGTGGAATTTGATTGGTCCAAAGGAAGATTTTTTCCATTGTTTG	exon sense-overlapping
ASHGA5P019848	0.0114338	0.908005	637.996	702.635	9.06648	9.57319	717.539	1218.67	601.702	359.135	616.134	702.635	664.787	772.892	414.654	673.2	664.445	637.996	9.03104	9.44848	9.26704	9.93078	8.7433	9.58602	9.12881	9.3018	9.16223	9.59885	P	P	P	P	P	P	P	P	P	P	noncoding	NR_037914	RCHY1	RefSeq	4471	chr4	-	76404246	76439640	GTATCACTGTGAAAACTGTGGAATTTGATTGGTCCAAAGGAAGATTTTTTCCATTGTTTG	exon sense-overlapping
ASHGA5P035839	0.0245076	0.907661	167.887	184.967	7.19324	7.7107	244.306	184.274	185.519	146.039	164.696	184.967	191.192	170.975	188.509	166.147	122.613	167.887	7.25698	7.82483	7.14724	7.20859	7.6199	7.93869	7.16823	7.97883	6.77383	7.60255	P	P	P	P	P	P	P	P	P	P	noncoding	ENST00000442821	AC009236.2	GENCODE	553	chr2	+	45395721	45396553	ACTGGAAGCTGTTTTATCACTTTGTATTTTGAGAACCGCTCCCTTTCCCGCACACGCATT	intergenic
ASHGA5P000100	0.0448913	0.906582	1199.88	1323.52	9.91371	10.5403	1263.06	1878.57	1167.34	693.521	1615.1	1323.52	1904.13	897.343	931.166	837.284	1429.46	1199.88	10.5247	10.3301	9.48155	10.5678	9.87523	10.5261	9.43311	10.2574	10.2539	11.0199	P	P	P	P	P	P	P	P	P	P	noncoding	BC043009		NRED	1261	chr10	-	33176190	33177408	CACCTCATCTTTTGCTCAAATTGAAATGTCATCGAACTGTATTTCTCAAGTCAATGGTCT	intergenic
ASHGA5P031334	0.0347317	0.906482	2320.48	2559.87	10.7762	11.5107	3834.62	2716.72	2558.91	1756.11	1933.02	2559.87	4791.08	1682.86	1794.96	1403.39	1930.11	2320.48	11.8797	11.9099	10.3724	11.1032	10.781	11.6481	10.1546	11.6312	10.6931	11.2612	P	P	P	P	P	P	P	P	P	P	noncoding	ENST00000570137	RP11-18F14.2	GENCODE	4614	chr16	-	80631802	80636416	GGGTGCCTTAGAAGTTGTATTTTTCATGTGTGCTAATATGCAGTATTTATACATTGTGAG	intergenic
ASHGA5P045838	0.00877359	0.905742	38.8448	42.8872	5.17394	5.48765	62.7091	46.0514	37.371	29.6899	38.6149	42.8872	52.4964	32.9536	42.5007	34.4261	31.8472	38.8448	5.42496	5.6965	4.95167	5.27464	5.54184	5.64193	5.0375	5.41028	4.91371	5.4149	P	P	P	P	P	P	P	P	P	P	noncoding	uc004aua.1	DNAPTP1	UCSC_knowngene	1867	chr9	+	96325163	96327030	GGCCAAAATTGGCATCCTCTCTCTTCTGTTTATCAGAAACCACCTTCTCATTTGTTGTCC	exon sense-overlapping
ASHGA5P016548	0.00736219	0.90461	58.7612	64.9575	5.69834	6.14317	82.5674	69.6296	62.521	67.8639	42.2056	64.9575	64.4578	56.6985	61.5555	79.8018	31.2924	58.7612	5.69635	6.12485	5.65868	5.8528	6.07502	6.39351	6.17242	6.80167	4.88922	5.54301	P	P	P	P	P	P	P	P	P	P	noncoding	ENST00000431553	RP11-69E11.4	GENCODE	497	chr1	-	39987951	40007513	ATGATGTGGTCAAATTAACAAGAGGCAGAGGCCGGAAACAAGGAGAGTCAGCAATTACCA	natural antisense
ASHGA5P031528	0.00719147	0.904169	7889.32	8725.49	12.6508	13.2952	11877.2	11818	7845.15	5622.08	6465.07	8725.49	8913.61	11063.3	6242.23	7231.88	5995.6	7889.32	12.7115	13.6049	13.1583	13.319	12.552	13.255	12.5047	13.3072	12.3274	12.99	P	P	P	P	P	P	P	P	P	P	noncoding	uc002czn.3	AK057657	UCSC_knowngene	3758	chr16	+	9202200	9205958	GGGCTGTCAGCATAACTGAAAATGTTTTCTTGGTGTGACACATGTATCTTTGTAATTGGT	intron sense-overlapping
ASHGA5P018722	0.0240593	0.903418	494.591	547.466	8.60316	9.20025	362.051	1003.52	401.6	599.54	370.616	547.466	290.768	421.372	371.568	956.95	432.297	494.591	7.85305	8.41975	8.39069	9.63591	8.59031	9.03144	9.61001	10.0703	8.57177	8.84387	P	P	P	P	P	P	P	P	P	P	noncoding	NR_033344	SLC38A6	RefSeq	1947	chr14	+	61447964	61550451	ACTGCTGTTAGAACTTCACAGACAGCGATCCCCAGGTGTTTCATTTGGTTTATCAGTGTT	exon sense-overlapping
ASHGA5P018722	0.0240593	0.903418	494.591	547.466	8.60316	9.20025	362.051	1003.52	401.6	599.54	370.616	547.466	290.768	421.372	371.568	956.95	432.297	494.591	7.85305	8.41975	8.39069	9.63591	8.59031	9.03144	9.61001	10.0703	8.57177	8.84387	P	P	P	P	P	P	P	P	P	P	noncoding	NR_033344	SLC38A6	RefSeq	1947	chr14	+	61447964	61550451	ACTGCTGTTAGAACTTCACAGACAGCGATCCCCAGGTGTTTCATTTGGTTTATCAGTGTT	exon sense-overlapping
ASHGA5P042848	0.00392828	0.90315	674.505	746.835	9.09685	9.73142	960.156	756.6	635.364	464.273	917.783	746.835	790.403	397.242	449.955	800.424	934.499	674.505	9.28883	9.89645	8.30814	9.22341	8.85068	9.66416	9.36373	9.68192	9.67287	10.1911	P	P	M	P	P	P	P	P	P	P	noncoding	TCONS_00019201	XLOC_009034	LincRNAs identified by Cabili et al	247	chr11	+	3536783	3542040	TGAGTTTAAATACTTTGTGTTTTTCTTAGTCAAACATGTGCAATTAAGCATGTGATAAAT	intergenic
ASHGA5P014956	0.0443858	0.901516	1940.49	2152.47	10.643	11.2777	2238.02	2954.58	2303.56	1876.07	1390.14	2152.47	1942.53	2203.37	2436.26	1482.66	1637.63	1940.49	10.5569	11.1436	10.7715	11.2408	11.2078	11.4868	10.2348	11.7214	10.4441	10.7959	M	P	P	P	P	P	P	P	P	P	noncoding	ENST00000429859	RP4-717I23.3	GENCODE	418	chr1	-	93730232	93802949	AGCCCCAAAGTTGCTGAACAGAAGACTTTTGAGAGTCAGCAGAAATCTTCCACTTTGCAT	natural antisense
ASHGA5P049313	0.0459041	0.900625	1658.01	1840.96	10.2914	11.0454	1708.31	2507.47	2256.24	1560.47	1172.28	1840.96	1897.15	1675	2180.01	2021.62	516.287	1658.01	10.52	10.755	10.3644	10.9897	11.0689	11.4551	10.6809	11.4667	8.82291	10.5603	P	P	P	P	P	P	P	P	P	P	noncoding	ENST00000566411	AC009120.6	GENCODE	679	chr16	-	74339099	74344205	GGGCAGGAAAAGGCATCAGGGTACCATGTTATCAGGCAAGTTCTTACATTCTAAGAAAAT	natural antisense
ASHGA5P043613	0.0165884	0.899702	64.6621	71.8706	5.84945	6.28539	106.71	72.6889	58.9119	55.1989	65.8434	71.8706	84.4927	66.0655	44.0135	73.29	55.4488	64.6621	6.07398	6.53665	5.86234	5.91083	5.59341	6.31428	6.05417	6.47011	5.66334	6.19507	P	P	P	P	P	P	P	P	P	P	noncoding	uc003teo.1	BC084560	UCSC_knowngene	1442	chr7	+	35082722	35084164	GGTGTCTTTTAGTCACCTGAAACCCCAAAGCCCAAGCCTGCTTTTCCTCCAGTCTCCTTA	intergenic
ASHGA5P017185	0.0378416	0.89944	68.8633	76.5624	5.92089	6.32683	119.27	76.4796	70.2549	40.8975	75.9103	76.5624	98.8609	64.3548	46.4541	51.116	83.5306	68.8633	6.29029	6.70925	5.82595	5.97982	5.67202	6.55898	5.56936	5.9742	6.24683	6.41189	P	P	P	P	P	P	M	P	P	P	noncoding	uc002rde.2	FLJ12334	UCSC_knowngene	2387	chr2	+	20068614	20077296	ATGTGGTCAACCAGATCTCCTTGATTGCACGGTCAACCCCGCTCCTGTCTGTCAGGCTCA	intergenic
ASHGA5P022055	0.0405507	0.8992	105.679	117.526	6.44431	6.96242	100.99	155.08	165.425	77.1944	88.9404	117.526	46.4876	124.824	158.549	119.867	78.6692	105.679	5.25287	6.44266	6.70863	6.95608	7.36373	7.76763	6.73622	7.00114	6.16008	6.64461	P	P	P	P	P	P	P	P	P	P	noncoding	ENST00000548104	RP11-44N21.1	GENCODE	372	chr14	+	105559945	105562036	GCGTCCCGGGCTGTTGTCCACACCAAGGGTGGCCTACAGAGGGAAGTGAGGACCTTGGGA	intergenic
ASHGA5P016708	0.0427962	0.894832	505.28	564.665	8.63732	9.24797	654.705	846.511	500.515	229.598	591.997	564.665	801.314	384.449	351.724	267.683	721.232	505.28	9.31396	9.31518	8.26272	9.39395	8.51264	9.34701	7.81694	8.64906	9.28033	9.53464	P	P	P	P	P	P	P	P	P	P	noncoding	ENST00000433265	CTC-338M12.3	GENCODE	311	chr5	+	180690634	180691230	TGTGCCAAACTGCCATCCTGCAGCCACCAGAACCTTCCACATGAAATGAAAGGCTCACCA	intergenic
ASHGA5P047784	0.0469797	0.894557	454.758	508.362	8.56713	9.0848	848.803	650.249	299.954	286.821	455.982	508.362	651.383	313.386	384.289	381.662	543.072	454.758	9.0036	9.70492	7.97883	9.00645	8.63398	8.61073	8.33577	8.96095	8.88348	9.14098	P	P	P	P	P	P	P	P	P	P	noncoding	ENST00000428814	RP11-432J24.2	GENCODE	297	chr10	+	134232586	134234457	GGTTTTCTGTTTCTTTGATTATAAAATAACCCCTGTTGGTGGGGGGAAAAAATTAGCAAA	intergenic
ASHGA5P046449	0.0105985	0.89323	168.087	188.179	7.12963	7.57238	321.678	221.194	198.822	126.157	73.0425	188.179	255.3	140.628	188.387	170.522	85.5982	168.087	7.666	8.24115	6.87846	7.46812	7.61847	8.03467	7.206	7.76682	6.27921	6.35113	P	P	P	M	P	P	P	P	P	P	noncoding	ENST00000434674	GS1-526D21.5	GENCODE	412	chrX	+	13785518	13785984	TGAATGTTCCTTGGACTCTTGGTTAATTCAAGTCCAAAGCACAGGACACTTGCCAATTAA	intron sense-overlapping
ASHGA5P000582	0.02377	0.893204	86.9513	97.3476	6.27301	6.76311	127.301	89.9864	81.6212	93.5888	94.2413	97.3476	115.601	80.0816	70.9658	97.8339	70.2746	86.9513	6.52136	6.81322	6.10883	6.19985	6.27725	6.7713	6.45184	7.29469	6.00577	6.73648	P	P	P	P	P	P	P	P	P	P	noncoding	DA446470		LincRNAs identified by Khalil et al	568	chr16	-	11650558	11730224	ATGGAGCTCAGAGCCTGGGTAGCCCCACACAATACCCTCCAGCCACATCTCCTGTAAATA	exon sense-overlapping
ASHGA5P000582	0.02377	0.893204	86.9513	97.3476	6.27301	6.76311	127.301	89.9864	81.6212	93.5888	94.2413	97.3476	115.601	80.0816	70.9658	97.8339	70.2746	86.9513	6.52136	6.81322	6.10883	6.19985	6.27725	6.7713	6.45184	7.29469	6.00577	6.73648	P	P	P	P	P	P	P	P	P	P	noncoding	DA446470		LincRNAs identified by Khalil et al	568	chr16	-	11650558	11730224	ATGGAGCTCAGAGCCTGGGTAGCCCCACACAATACCCTCCAGCCACATCTCCTGTAAATA	exon sense-overlapping
ASHGA5P000582	0.02377	0.893204	86.9513	97.3476	6.27301	6.76311	127.301	89.9864	81.6212	93.5888	94.2413	97.3476	115.601	80.0816	70.9658	97.8339	70.2746	86.9513	6.52136	6.81322	6.10883	6.19985	6.27725	6.7713	6.45184	7.29469	6.00577	6.73648	P	P	P	P	P	P	P	P	P	P	noncoding	DA446470		LincRNAs identified by Khalil et al	568	chr16	-	11650558	11730224	ATGGAGCTCAGAGCCTGGGTAGCCCCACACAATACCCTCCAGCCACATCTCCTGTAAATA	exon sense-overlapping
ASHGA5P000582	0.02377	0.893204	86.9513	97.3476	6.27301	6.76311	127.301	89.9864	81.6212	93.5888	94.2413	97.3476	115.601	80.0816	70.9658	97.8339	70.2746	86.9513	6.52136	6.81322	6.10883	6.19985	6.27725	6.7713	6.45184	7.29469	6.00577	6.73648	P	P	P	P	P	P	P	P	P	P	noncoding	DA446470		LincRNAs identified by Khalil et al	568	chr16	-	11650558	11730224	ATGGAGCTCAGAGCCTGGGTAGCCCCACACAATACCCTCCAGCCACATCTCCTGTAAATA	exon sense-overlapping
ASHGA5P000582	0.02377	0.893204	86.9513	97.3476	6.27301	6.76311	127.301	89.9864	81.6212	93.5888	94.2413	97.3476	115.601	80.0816	70.9658	97.8339	70.2746	86.9513	6.52136	6.81322	6.10883	6.19985	6.27725	6.7713	6.45184	7.29469	6.00577	6.73648	P	P	P	P	P	P	P	P	P	P	noncoding	DA446470		LincRNAs identified by Khalil et al	568	chr16	-	11650558	11730224	ATGGAGCTCAGAGCCTGGGTAGCCCCACACAATACCCTCCAGCCACATCTCCTGTAAATA	exon sense-overlapping
ASHGA5P000582	0.02377	0.893204	86.9513	97.3476	6.27301	6.76311	127.301	89.9864	81.6212	93.5888	94.2413	97.3476	115.601	80.0816	70.9658	97.8339	70.2746	86.9513	6.52136	6.81322	6.10883	6.19985	6.27725	6.7713	6.45184	7.29469	6.00577	6.73648	P	P	P	P	P	P	P	P	P	P	noncoding	DA446470		LincRNAs identified by Khalil et al	568	chr16	-	11650558	11730224	ATGGAGCTCAGAGCCTGGGTAGCCCCACACAATACCCTCCAGCCACATCTCCTGTAAATA	exon sense-overlapping
ASHGA5P000582	0.02377	0.893204	86.9513	97.3476	6.27301	6.76311	127.301	89.9864	81.6212	93.5888	94.2413	97.3476	115.601	80.0816	70.9658	97.8339	70.2746	86.9513	6.52136	6.81322	6.10883	6.19985	6.27725	6.7713	6.45184	7.29469	6.00577	6.73648	P	P	P	P	P	P	P	P	P	P	noncoding	DA446470		LincRNAs identified by Khalil et al	568	chr16	-	11650558	11730224	ATGGAGCTCAGAGCCTGGGTAGCCCCACACAATACCCTCCAGCCACATCTCCTGTAAATA	exon sense-overlapping
ASHGA5P000582	0.02377	0.893204	86.9513	97.3476	6.27301	6.76311	127.301	89.9864	81.6212	93.5888	94.2413	97.3476	115.601	80.0816	70.9658	97.8339	70.2746	86.9513	6.52136	6.81322	6.10883	6.19985	6.27725	6.7713	6.45184	7.29469	6.00577	6.73648	P	P	P	P	P	P	P	P	P	P	noncoding	DA446470		LincRNAs identified by Khalil et al	568	chr16	-	11650558	11730224	ATGGAGCTCAGAGCCTGGGTAGCCCCACACAATACCCTCCAGCCACATCTCCTGTAAATA	exon sense-overlapping
ASHGA5P000582	0.02377	0.893204	86.9513	97.3476	6.27301	6.76311	127.301	89.9864	81.6212	93.5888	94.2413	97.3476	115.601	80.0816	70.9658	97.8339	70.2746	86.9513	6.52136	6.81322	6.10883	6.19985	6.27725	6.7713	6.45184	7.29469	6.00577	6.73648	P	P	P	P	P	P	P	P	P	P	noncoding	DA446470		LincRNAs identified by Khalil et al	568	chr16	-	11650558	11730224	ATGGAGCTCAGAGCCTGGGTAGCCCCACACAATACCCTCCAGCCACATCTCCTGTAAATA	exon sense-overlapping
ASHGA5P000582	0.02377	0.893204	86.9513	97.3476	6.27301	6.76311	127.301	89.9864	81.6212	93.5888	94.2413	97.3476	115.601	80.0816	70.9658	97.8339	70.2746	86.9513	6.52136	6.81322	6.10883	6.19985	6.27725	6.7713	6.45184	7.29469	6.00577	6.73648	P	P	P	P	P	P	P	P	P	P	noncoding	DA446470		LincRNAs identified by Khalil et al	568	chr16	-	11650558	11730224	ATGGAGCTCAGAGCCTGGGTAGCCCCACACAATACCCTCCAGCCACATCTCCTGTAAATA	exon sense-overlapping
ASHGA5P000582	0.02377	0.893204	86.9513	97.3476	6.27301	6.76311	127.301	89.9864	81.6212	93.5888	94.2413	97.3476	115.601	80.0816	70.9658	97.8339	70.2746	86.9513	6.52136	6.81322	6.10883	6.19985	6.27725	6.7713	6.45184	7.29469	6.00577	6.73648	P	P	P	P	P	P	P	P	P	P	noncoding	DA446470		LincRNAs identified by Khalil et al	568	chr16	-	11650558	11730224	ATGGAGCTCAGAGCCTGGGTAGCCCCACACAATACCCTCCAGCCACATCTCCTGTAAATA	exon sense-overlapping
ASHGA5P000582	0.02377	0.893204	86.9513	97.3476	6.27301	6.76311	127.301	89.9864	81.6212	93.5888	94.2413	97.3476	115.601	80.0816	70.9658	97.8339	70.2746	86.9513	6.52136	6.81322	6.10883	6.19985	6.27725	6.7713	6.45184	7.29469	6.00577	6.73648	P	P	P	P	P	P	P	P	P	P	noncoding	DA446470		LincRNAs identified by Khalil et al	568	chr16	-	11650558	11730224	ATGGAGCTCAGAGCCTGGGTAGCCCCACACAATACCCTCCAGCCACATCTCCTGTAAATA	exon sense-overlapping
ASHGA5P000582	0.02377	0.893204	86.9513	97.3476	6.27301	6.76311	127.301	89.9864	81.6212	93.5888	94.2413	97.3476	115.601	80.0816	70.9658	97.8339	70.2746	86.9513	6.52136	6.81322	6.10883	6.19985	6.27725	6.7713	6.45184	7.29469	6.00577	6.73648	P	P	P	P	P	P	P	P	P	P	noncoding	DA446470		LincRNAs identified by Khalil et al	568	chr16	-	11650558	11730224	ATGGAGCTCAGAGCCTGGGTAGCCCCACACAATACCCTCCAGCCACATCTCCTGTAAATA	exon sense-overlapping
ASHGA5P000582	0.02377	0.893204	86.9513	97.3476	6.27301	6.76311	127.301	89.9864	81.6212	93.5888	94.2413	97.3476	115.601	80.0816	70.9658	97.8339	70.2746	86.9513	6.52136	6.81322	6.10883	6.19985	6.27725	6.7713	6.45184	7.29469	6.00577	6.73648	P	P	P	P	P	P	P	P	P	P	noncoding	DA446470		LincRNAs identified by Khalil et al	568	chr16	-	11650558	11730224	ATGGAGCTCAGAGCCTGGGTAGCCCCACACAATACCCTCCAGCCACATCTCCTGTAAATA	exon sense-overlapping
ASHGA5P000582	0.02377	0.893204	86.9513	97.3476	6.27301	6.76311	127.301	89.9864	81.6212	93.5888	94.2413	97.3476	115.601	80.0816	70.9658	97.8339	70.2746	86.9513	6.52136	6.81322	6.10883	6.19985	6.27725	6.7713	6.45184	7.29469	6.00577	6.73648	P	P	P	P	P	P	P	P	P	P	noncoding	DA446470		LincRNAs identified by Khalil et al	568	chr16	-	11650558	11730224	ATGGAGCTCAGAGCCTGGGTAGCCCCACACAATACCCTCCAGCCACATCTCCTGTAAATA	exon sense-overlapping
ASHGA5P000582	0.02377	0.893204	86.9513	97.3476	6.27301	6.76311	127.301	89.9864	81.6212	93.5888	94.2413	97.3476	115.601	80.0816	70.9658	97.8339	70.2746	86.9513	6.52136	6.81322	6.10883	6.19985	6.27725	6.7713	6.45184	7.29469	6.00577	6.73648	P	P	P	P	P	P	P	P	P	P	noncoding	DA446470		LincRNAs identified by Khalil et al	568	chr16	-	11650558	11730224	ATGGAGCTCAGAGCCTGGGTAGCCCCACACAATACCCTCCAGCCACATCTCCTGTAAATA	exon sense-overlapping
ASHGA5P000582	0.02377	0.893204	86.9513	97.3476	6.27301	6.76311	127.301	89.9864	81.6212	93.5888	94.2413	97.3476	115.601	80.0816	70.9658	97.8339	70.2746	86.9513	6.52136	6.81322	6.10883	6.19985	6.27725	6.7713	6.45184	7.29469	6.00577	6.73648	P	P	P	P	P	P	P	P	P	P	noncoding	DA446470		LincRNAs identified by Khalil et al	568	chr16	-	11650558	11730224	ATGGAGCTCAGAGCCTGGGTAGCCCCACACAATACCCTCCAGCCACATCTCCTGTAAATA	exon sense-overlapping
ASHGA5P000582	0.02377	0.893204	86.9513	97.3476	6.27301	6.76311	127.301	89.9864	81.6212	93.5888	94.2413	97.3476	115.601	80.0816	70.9658	97.8339	70.2746	86.9513	6.52136	6.81322	6.10883	6.19985	6.27725	6.7713	6.45184	7.29469	6.00577	6.73648	P	P	P	P	P	P	P	P	P	P	noncoding	DA446470		LincRNAs identified by Khalil et al	568	chr16	-	11650558	11730224	ATGGAGCTCAGAGCCTGGGTAGCCCCACACAATACCCTCCAGCCACATCTCCTGTAAATA	exon sense-overlapping
ASHGA5P000582	0.02377	0.893204	86.9513	97.3476	6.27301	6.76311	127.301	89.9864	81.6212	93.5888	94.2413	97.3476	115.601	80.0816	70.9658	97.8339	70.2746	86.9513	6.52136	6.81322	6.10883	6.19985	6.27725	6.7713	6.45184	7.29469	6.00577	6.73648	P	P	P	P	P	P	P	P	P	P	noncoding	DA446470		LincRNAs identified by Khalil et al	568	chr16	-	11650558	11730224	ATGGAGCTCAGAGCCTGGGTAGCCCCACACAATACCCTCCAGCCACATCTCCTGTAAATA	exon sense-overlapping
ASHGA5P000582	0.02377	0.893204	86.9513	97.3476	6.27301	6.76311	127.301	89.9864	81.6212	93.5888	94.2413	97.3476	115.601	80.0816	70.9658	97.8339	70.2746	86.9513	6.52136	6.81322	6.10883	6.19985	6.27725	6.7713	6.45184	7.29469	6.00577	6.73648	P	P	P	P	P	P	P	P	P	P	noncoding	DA446470		LincRNAs identified by Khalil et al	568	chr16	-	11650558	11730224	ATGGAGCTCAGAGCCTGGGTAGCCCCACACAATACCCTCCAGCCACATCTCCTGTAAATA	intron sense-overlapping
ASHGA5P026566	0.0205141	0.892408	625.152	700.522	8.98162	9.6383	844.265	822.156	609.807	416.634	809.748	700.522	657.532	358.06	418.009	774.822	917.334	625.152	9.01663	9.69647	8.16475	9.35908	8.7553	9.60667	9.32421	9.5287	9.64723	10.0006	P	P	P	P	P	P	P	P	P	P	noncoding	ENST00000529069	RP11-119D9.1	GENCODE	600	chr11	+	67653947	67661564	GGCACTTTGAGCTACAGATGAGTTTAAATACTTTGTGTTTTTCTTAGTCAAACATGTGCA	intergenic
ASHGA5P058516	0.000253082	0.892157	60.8208	68.1728	5.79147	6.20798	89.2177	72.8534	66.0042	47.8907	64.8982	68.1728	73.4114	49.2237	55.8563	65.8318	59.781	60.8208	5.87176	6.24719	5.46928	5.9144	5.93569	6.46678	5.9048	6.23721	5.77585	6.17434	P	P	P	M	P	P	P	P	P	P	noncoding	uc009viy.2	WASH7P	UCSC_knowngene	1134	chr1	-	16606	29370	ATCTTCAGCAGGTCAGATTATCCTTGTAGAGGCCCCCTGGATGGCACCAAGATCGGCCCT	intergenic
ASHGA5P037943	0.0474538	0.889828	298.909	335.917	7.99661	8.47114	406.198	507.152	346.789	138.069	281.378	335.917	333.342	322.806	336.467	300.012	201.916	298.909	8.03487	8.58765	8.0184	8.63934	8.45472	8.81268	7.98793	7.90037	7.48711	8.41566	P	P	P	P	P	P	P	P	P	P	noncoding	ENST00000439588	RP11-247I13.8	GENCODE	615	chr22	+	31857649	31860190	AGACATTGGCCTTCCTCTTTGCAGCAATAGAAGTACGTCACGATAAATAATTTTCCATGA	intronic antisense
ASHGA5P037943	0.0474538	0.889828	298.909	335.917	7.99661	8.47114	406.198	507.152	346.789	138.069	281.378	335.917	333.342	322.806	336.467	300.012	201.916	298.909	8.03487	8.58765	8.0184	8.63934	8.45472	8.81268	7.98793	7.90037	7.48711	8.41566	P	P	P	P	P	P	P	P	P	P	noncoding	ENST00000439588	RP11-247I13.8	GENCODE	615	chr22	+	31857649	31860190	AGACATTGGCCTTCCTCTTTGCAGCAATAGAAGTACGTCACGATAAATAATTTTCCATGA	natural antisense
ASHGA5P037943	0.0474538	0.889828	298.909	335.917	7.99661	8.47114	406.198	507.152	346.789	138.069	281.378	335.917	333.342	322.806	336.467	300.012	201.916	298.909	8.03487	8.58765	8.0184	8.63934	8.45472	8.81268	7.98793	7.90037	7.48711	8.41566	P	P	P	P	P	P	P	P	P	P	noncoding	ENST00000439588	RP11-247I13.8	GENCODE	615	chr22	+	31857649	31860190	AGACATTGGCCTTCCTCTTTGCAGCAATAGAAGTACGTCACGATAAATAATTTTCCATGA	natural antisense
ASHGA5P057192	0.0473646	0.889533	51.6715	58.0884	5.56189	5.96154	72.2245	72.9572	38.7472	49.5001	57.0128	58.0884	52.5925	57.8545	48.0733	61.4921	38.3451	51.6715	5.42807	5.92086	5.68292	5.91731	5.72245	5.69712	5.8141	6.29079	5.16191	5.98162	P	P	P	P	P	P	P	P	P	P	noncoding	TCONS_00014249	XLOC_006338	LincRNAs identified by Cabili et al	1508	chr7	-	3133764	3140708	GGGACTACAGGATAAACTAAACAGGCCTCAAGAATGTGACCTCCCACGCTCCTCCATGAA	intergenic
ASHGA5P018604	0.0366967	0.889466	1297.51	1458.75	10.0614	10.7111	1507.57	1938.23	1678.64	1248.63	920.703	1458.75	1335.24	1441.59	1692.49	994.666	1023.57	1297.51	10.0032	10.5705	10.1474	10.6105	10.6971	11.0313	9.66818	11.1459	9.791	10.1972	P	P	P	P	P	P	P	P	P	P	noncoding	ENST00000455474	RP4-717I23.3	GENCODE	299	chr1	-	93730206	93803026	GGTATTGAAAGAGGGCTCTGAGAGATTTCATTTCTGTCCTGCTGATGAAGTCTACGTTCA	natural antisense
ASHGA5P057984	0.03461	0.888127	141.655	159.499	6.9545	7.45595	232.605	173.059	100.835	116.867	174.129	159.499	161.601	148.996	111.178	170.325	116.178	141.655	7.01154	7.7525	6.9635	7.11793	6.89103	7.07839	7.20461	7.65	6.7018	7.68095	P	P	P	P	P	P	P	P	P	P	noncoding	TCONS_00024672	XLOC_011957	LincRNAs identified by Cabili et al	697	chr16	-	56073889	56110712	AGCTCAGGAATTGAAGGGCCACAGCTCCTCCCACCTGTTTTATTGTTCCTGCTGGACTTT	intergenic
ASHGA5P046968	0.0437452	0.882177	160.175	181.567	7.07697	7.56802	246.619	236.128	185.681	70.9166	168.492	181.567	202.471	237.673	115.873	102.109	142.747	160.175	7.33985	7.83801	7.5948	7.56036	6.94977	7.9408	6.51427	6.86661	6.98617	7.63431	P	P	P	P	P	P	P	P	P	P	noncoding	TCONS_00014559	XLOC_007135	LincRNAs identified by Cabili et al	2135	chr8	-	82608602	82610929	CTTCGACCTAGGCAACAAAAGTTATGAGTCAAGATATTTGGTCACATAACTAAAGATAAC	intergenic
ASHGA5P046808	0.0117307	0.881184	898.268	1019.39	9.55609	10.2045	1212.66	1403.9	871.055	765.993	843.329	1019.39	1071.23	1136.14	779.761	706.25	797.957	898.268	9.69707	10.2699	9.81106	10.1376	9.6298	10.1392	9.20635	10.4082	9.43614	10.0675	P	P	P	P	P	P	P	P	P	P	noncoding	ENST00000528056	PRKY	GENCODE	7218	chrY	+	7142012	7249589	TGTCTTAATGCATTTGGATACTTTGGGGTGTGTGCCTGTCTGTGTGTGTGTCTTGGTGAA	intergenic
ASHGA5P037123	0.0475515	0.880807	56.7461	64.4251	5.71279	6.11907	68.658	86.9391	46.1012	54.8206	65.6066	64.4251	58.4922	55.4816	58.5194	54.4417	56.7954	56.7461	5.56974	5.84384	5.63016	6.15504	6.00612	5.94584	5.65744	6.46027	5.70048	6.19037	P	P	P	P	P	P	P	P	P	P	noncoding	ENST00000442780	RP11-560A15.4	GENCODE	377	chr20	+	55680796	55682184	AGATGGTTCAAGGGTTGTGTGTGTTTCCTCTGCCTGCTGTAATAAATTACTACAAACTAA	intergenic
ASHGA5P018326	0.0479766	0.880663	224.652	255.095	7.529	8.11578	314.544	381.486	246.231	170.43	162.783	255.095	366.438	256	212.51	133.119	155.195	224.652	8.1616	8.20769	7.69512	8.24132	7.80446	8.34009	6.87362	8.20743	7.11021	7.58236	P	P	P	P	P	P	P	P	P	P	noncoding	ENST00000452075	ZNF37BP	GENCODE	2522	chr10	-	43015072	43048242	AAGAAAGGTCTCTACACCCTCTCGGTTTTCTCTGCTCTGCCAACACTAGTGGAATATGAT	intergenic
ASHGA5P050238	0.0463623	0.879999	232.769	264.511	7.64919	8.24649	292.564	296.279	217.245	227.307	289.157	264.511	288.193	240.785	231.167	230.793	172.907	232.769	7.84106	8.10176	7.61427	7.87699	7.91188	8.16248	7.61764	8.63855	7.26112	8.45265	P	P	P	P	P	P	P	P	M	P	noncoding	ENST00000574565	APOC1P1	GENCODE	731	chr19	+	45430209	45434585	AACAACCAAATTTTGCACCCCTGCCTCATCTTCCTGGCAGGCCCAGCCCCAGCCTAGGGG	intergenic
ASHGA5P032231	0.0284065	0.879296	41.0266	46.6584	5.25464	5.65632	63.7337	44.695	35.5798	45.9343	43.3493	46.6584	50.4138	35.4013	39.9239	46.6638	32.7302	41.0266	5.37019	5.72127	5.04585	5.23254	5.45646	5.57238	5.44939	6.17177	4.95132	5.58366	P	P	P	P	P	P	P	P	P	P	noncoding	uc002gsn.2	BC038464	UCSC_knowngene	2161	chr17	-	18079875	18088067	TTAAATCAGCGTGTGCAAATGGAGTCTTCTCCTCCAGCCAATCCTTTACCTACCTACATG	intronic antisense
ASHGA5P032231	0.0284065	0.879296	41.0266	46.6584	5.25464	5.65632	63.7337	44.695	35.5798	45.9343	43.3493	46.6584	50.4138	35.4013	39.9239	46.6638	32.7302	41.0266	5.37019	5.72127	5.04585	5.23254	5.45646	5.57238	5.44939	6.17177	4.95132	5.58366	P	P	P	P	P	P	P	P	P	P	noncoding	uc002gsn.2	BC038464	UCSC_knowngene	2161	chr17	-	18079875	18088067	TTAAATCAGCGTGTGCAAATGGAGTCTTCTCCTCCAGCCAATCCTTTACCTACCTACATG	natural antisense
ASHGA5P033907	0.0339855	0.879261	112.715	128.193	6.63038	7.08876	148.058	179.891	149.679	72.2932	91.0432	128.193	156.954	119.812	94.3837	104.076	88.349	112.715	6.96993	7.05699	6.65374	7.17489	6.66664	7.63255	6.53786	6.90033	6.32371	6.67906	P	P	P	P	P	P	P	P	P	P	noncoding	ENST00000581996	RP11-17M16.2	GENCODE	813	chr18	+	74203607	74205487	GAACTCGCCGTTTTGATTTTATTATTTAAGCATGCGCCAGCAATCGTGTTTCCTTAAGAA	intronic antisense
ASHGA5P047705	0.0191025	0.879014	3633.03	4133.08	11.5309	12.2268	4692.78	5851.3	3589.8	3227.81	3303.69	4133.08	5269.16	3111.76	3785.09	3365.71	2633.45	3633.03	12.0102	12.2187	11.2872	12.2477	11.8099	12.1178	11.3928	12.508	11.1543	12.042	P	P	P	P	P	P	P	P	P	P	noncoding	ENST00000420207	RP11-25C19.1	GENCODE	483	chr10	+	114447363	114511234	CTCCCTGCTGTTTCCCTAATCATGTAGAGGAAAGCAACAATGTTCAGTAATTAACTGTTT	intron sense-overlapping
ASHGA5P025766	0.0432961	0.878625	7459.74	8490.24	12.5349	13.2834	10513.1	9976.57	7406.77	5497.93	9056.83	8490.24	12328	7641.75	7451.06	5061.2	4816.64	7459.74	13.2217	13.4292	12.6204	13.0583	12.8131	13.1789	12	13.2707	12.0193	13.4797	M	P	P	P	P	P	P	P	M	P	noncoding	NR_034011	SNHG8	RefSeq	308	chr4	+	119199916	119200978	GTCGGGATTAGGTGAAAGAAGCTGAGCTGAACACATTACGATGGATGATGGAAACATAAG	intergenic
ASHGA5P043429	0.0214596	0.876287	60.8587	69.4507	5.79619	6.22662	90.1085	81.287	60.0459	46.4443	69.3678	69.4507	59.6172	65.3438	63.2849	66.1696	49.8781	60.8587	5.59222	6.26302	5.84586	6.06062	6.11359	6.34398	5.91225	6.18955	5.51703	6.27595	P	P	P	P	P	P	P	P	P	P	noncoding	TCONS_00018249	XLOC_008527	LincRNAs identified by Cabili et al	949	chr10	+	81213169	81214510	ATAAGACAGAGAAAAACAGCTCCCATGATAACATTGATGCTGCCAGCCCTTCCTGCTACT	intergenic
ASHGA5P023161	0.00113747	0.875816	144.36	164.83	6.97065	7.46833	190.816	253.464	157.751	94.5708	127.546	164.83	138.699	199.124	136.16	135.593	112.227	144.36	6.78955	7.45195	7.35066	7.66456	7.16578	7.70846	6.89279	7.31343	6.65449	7.20323	P	P	P	P	P	P	P	P	P	P	noncoding	ENST00000571869	RP11-382B18.3	pseudogene	389	chr15	-	30672555	30679190	TGTCACCCCCATTATTGACAATCCAAAGATAATGAAACAACCACCATCGGTTAAATTTGA
ASHGA5P058544	0.0231017	0.873082	597.066	683.86	8.95321	9.60695	818.2	897.278	562.771	447.183	693.868	683.86	779.489	825.838	429.604	495.437	454.961	597.066	9.2695	9.64876	9.35732	9.48022	8.79096	9.49916	8.70811	9.62833	8.64016	9.77829	P	P	P	P	P	P	P	P	P	P	noncoding	uc010del.2	AMZ2P1	UCSC_knowngene	2161	chr17	-	62962667	62971703	GATGTCGCGGGATCTCTATGAAGCACCAGAATTATCAGTGAAGAATATATTAAATGGCTC	intergenic
ASHGA5P032598	0.011336	0.871261	8509.43	9766.8	12.6486	13.3821	15702.5	13232.4	9244.27	5056.74	5598.08	9766.79	15503.1	7838.97	9806.24	4638.27	4760.51	8509.43	13.5593	14.0212	12.6629	13.4996	13.1404	13.4644	11.872	13.1463	12.0083	12.7791	P	P	P	P	P	P	P	P	P	P	noncoding	ENST00000583175	RP11-214C8.5	GENCODE	2694	chr17	-	62116509	62119203	TTATAATTCTGCTGATGGCGGCATCTTATGTCGAGCCAACCACAATAAAGGTAGTTTTAG	intergenic
ASHGA5P047893	0.0272894	0.870857	472.199	542.223	8.50663	9.27296	466.568	757.242	556.408	479.976	450.924	542.224	415.05	277.012	395.015	962.638	311.28	472.199	8.34059	8.80522	7.80527	9.22431	8.67631	9.48022	9.6187	9.73121	8.09228	9.12386	P	P	P	P	P	P	P	P	P	P	noncoding	TCONS_00017441	XLOC_008033	LincRNAs identified by Cabili et al	2873	chrX	+	102213937	102219282	TTGTGTTAAGGGGTAGGGGAAGAGCAAGTGAAGGATGCAGATTAATTTCTATTTAGGAAT	intergenic
ASHGA5P027473	0.0158988	0.870788	1511.29	1735.54	10.2834	10.9634	1925.45	2360.76	1889.77	1350.38	1151.34	1735.54	1572.23	1697.71	1918.19	1204.84	1163.47	1511.29	10.2474	10.928	10.3817	10.8956	10.8813	11.2002	9.94353	11.2585	9.96321	10.5348	P	P	P	P	P	P	P	P	P	P	noncoding	ENST00000424517	RP4-717I23.3	GENCODE	262	chr1	-	93730232	93790207	CTGTCCTGCTGATGAAGTCTACGTTCATTCAGGGCCTGCTGTGGAAGACCAGCCCCAAAG	natural antisense
ASHGA5P037543	0.0436649	0.870705	4746.02	5450.78	11.8418	12.5655	6828.15	8017.47	5840.65	2760.67	3806.95	5450.78	4389.36	6115.12	7297.65	3915.74	2012.24	4746.02	11.7496	12.7807	12.2996	12.7214	12.783	12.8073	11.6158	12.2857	10.7612	12.2326	P	P	P	P	P	P	P	P	P	P	noncoding	ENST00000510265	PARP4P3	pseudogene	317	chr22	-	17134781	17140518	CTCCTGGACCTAATTGCCACAATGAGATACTACAGTTTATTCGCACCAGGGTGGAAAAAA
ASHGA5P043722	0.0416171	0.870125	62.6572	72.0094	5.74472	6.30449	97.0756	52.794	61.0872	70.5515	78.5389	72.0094	52.728	45.339	47.7599	118.526	48.9328	62.6572	5.43195	6.38092	5.36372	5.46279	5.71384	6.36215	6.72229	6.85864	5.49177	6.45794	P	P	P	P	P	P	P	P	P	P	noncoding	ENST00000567474	RP11-731K22.1	GENCODE	474	chr7	+	73402303	73403096	ATGGGCTTGGGTGGGAGATCAGGCAATAATAAATAATAAAAACAACAAATTTCACACTTG	intergenic
ASHGA5P052710	0.0202464	0.869938	36254.6	41674.9	14.8952	15.4997	48647	37105.7	37872.3	26077.8	58671.7	41674.9	39333.3	35207.6	35071.6	35941	35719.5	36254.6	14.863	15.6196	14.9101	15.0188	14.9629	15.4295	14.8182	15.4178	14.9221	16.0127	P	P	P	P	P	P	P	P	P	P	noncoding	ENST00000445172	RP1-153P14.3	GENCODE	735	chr6	-	37511328	37514531	AGGCTGAAGTCACCATTGCAGATGCTTAGGTCAACTATTTTAATTCATTGATTACTAGTT	intergenic
ASHGA5P028332	0.0148548	0.868416	1655.1	1905.88	10.3877	11.0747	2680.24	2506.81	1490.73	1130.68	1720.95	1905.88	2596.46	1443.35	1641.94	1431.06	1162.69	1655.1	10.985	11.3928	10.1501	10.989	10.6562	10.8723	10.1847	10.9979	9.96263	11.1217	P	P	P	P	P	P	P	P	P	P	noncoding	uc001uan.3	BC029038	UCSC_knowngene	1199	chr12	+	121837960	121839159	GGAAGGCAGTTTACCATTCAAAAGAAGAGTTATTTGTAAGTAACCATATTACAAGGCAGA	exon sense-overlapping
ASHGA5P028332	0.0148548	0.868416	1655.1	1905.88	10.3877	11.0747	2680.24	2506.81	1490.73	1130.68	1720.95	1905.88	2596.46	1443.35	1641.94	1431.06	1162.69	1655.1	10.985	11.3928	10.1501	10.989	10.6562	10.8723	10.1847	10.9979	9.96263	11.1217	P	P	P	P	P	P	P	P	P	P	noncoding	uc001uan.3	BC029038	UCSC_knowngene	1199	chr12	+	121837960	121839159	GGAAGGCAGTTTACCATTCAAAAGAAGAGTTATTTGTAAGTAACCATATTACAAGGCAGA	exon sense-overlapping
ASHGA5P028332	0.0148548	0.868416	1655.1	1905.88	10.3877	11.0747	2680.24	2506.81	1490.73	1130.68	1720.95	1905.88	2596.46	1443.35	1641.94	1431.06	1162.69	1655.1	10.985	11.3928	10.1501	10.989	10.6562	10.8723	10.1847	10.9979	9.96263	11.1217	P	P	P	P	P	P	P	P	P	P	noncoding	uc001uan.3	BC029038	UCSC_knowngene	1199	chr12	+	121837960	121839159	GGAAGGCAGTTTACCATTCAAAAGAAGAGTTATTTGTAAGTAACCATATTACAAGGCAGA	exon sense-overlapping
ASHGA5P020945	0.0474432	0.86204	177.436	205.832	7.15164	7.74971	260.272	299.433	180.732	80.8982	207.826	205.832	220.103	278.98	86.0154	95.5464	206.534	177.436	7.46159	7.92636	7.81575	7.89218	6.54018	7.898	6.4224	7.07272	7.51829	7.95928	P	P	P	P	P	P	P	P	P	P	noncoding	ENST00000522318	IMPA1P	GENCODE	332	chr8	-	82538291	82543369	CCGACTCGAGAAGATGGCTGATCCTTGGCAGGAATGCATGGATTATGCAGTAACCCTAGC	intergenic
ASHGA5P030097	0.00258536	0.861375	29073.1	33751.9	14.5705	15.2289	39367.6	42799.6	34703.5	22266.6	29622.3	33751.9	29487.3	23824.8	34353.5	32010	25689.9	29073.1	14.4419	15.3456	14.3581	15.2007	14.9306	15.2973	14.64	15.1818	14.482	15.1191	P	P	P	P	P	P	P	P	P	P	noncoding	TCONS_00008036	XLOC_003501	LincRNAs identified by Cabili et al	257	chr4	+	33517098	33522181	TTAGCTGTTTACCTACTTCCTGGAAAAATAGTAGCTCTCTGTAGCATTACGGAGTTTCAG	intergenic
ASHGA5P036747	0.0321395	0.86093	260.629	302.729	7.81333	8.44404	331.031	306.717	219.417	313.472	343.009	302.729	283.398	239.985	243.935	325.914	209.912	260.629	7.81458	8.28872	7.6095	7.93209	7.99909	8.17656	8.10352	9.09587	7.53996	8.72697	P	P	P	P	P	P	P	P	P	P	noncoding	TCONS_00026539	XLOC_012861	LincRNAs identified by Cabili et al	338	chr18	-	59259622	59274187	CAAGGTAATACAGTGTGGAAGGCAGAAAAATGACCCACTCTCCCCTGATATCCATTAAAG	intergenic
ASHGA5P018733	0.0288041	0.860534	1229.93	1429.26	9.98864	10.6834	1509.33	1908.37	1579.31	1221.95	927.354	1429.26	1339.96	1348.95	1565.4	942.745	952.581	1229.93	10.0089	10.5735	10.0532	10.5904	10.5942	10.9412	9.59053	11.1032	9.69647	10.2089	P	P	P	P	P	P	P	P	P	P	noncoding	ENST00000457025	RP4-717I23.3	GENCODE	413	chr1	-	93730196	93804088	GGACTAAATTGAGGGCTCTGAGAGATTTCATTTCTGTCCTGCTGATGAAGTCTACGTTCA	natural antisense
ASHGA5P040876	0.0386417	0.856885	97.4162	113.686	6.44281	6.99353	142.696	122.538	91.063	106.427	105.708	113.686	106.744	115.151	89.8899	92.6894	82.6072	97.4162	6.40402	6.99672	6.5996	6.63162	6.60124	6.92874	6.37979	7.49671	6.22941	6.91387	P	P	P	M	P	M	M	P	M	P	noncoding	ENST00000521965	MIR4454	GENCODE	602	chr5	-	170174050	170185183	AGGTTTCAGTAGAGGGTACTATACTAAATAATGCAGCCCTCCTTCTTTCTTCCATGCCAG	intergenic
ASHGA5P046031	0.0278062	0.8568	704.53	822.28	9.16707	9.86174	892.645	1188.3	755.223	491.329	783.899	822.28	1161.9	591.369	593.72	670.686	504.978	704.53	9.81238	9.78385	8.87924	9.89528	9.23143	9.91749	9.12386	9.76432	8.78846	9.94776	P	P	P	P	P	P	P	P	P	P	noncoding	NR_015427	LINC00094	RefSeq	5734	chr9	+	136890560	136896719	GACCTGTCAACTGTCGTGTGTGAATTCCTTAAATTCGGTTTAAATAGTCCATTAAAGATC	natural antisense
ASHGA5P046625	0.034988	0.855704	518.874	606.37	8.63189	9.34128	920.68	890.596	472.346	290.943	457.286	606.37	683.861	961.862	290.071	375.256	283.319	518.874	9.07476	9.83716	9.58696	9.47063	8.23095	9.26576	8.31205	8.98724	7.95475	9.1456	P	P	P	P	P	P	P	P	P	P	noncoding	uc004epb.3	AF070581	UCSC_knowngene	4939	chrX	+	110367492	110372431	TTCCTAGAGTATGTCATCTTCTATATACTCTATACAGCAGGAATCCTTGCTGTACAACAA	intron sense-overlapping
ASHGA5P046625	0.034988	0.855704	518.874	606.37	8.63189	9.34128	920.68	890.596	472.346	290.943	457.286	606.37	683.861	961.862	290.071	375.256	283.319	518.874	9.07476	9.83716	9.58696	9.47063	8.23095	9.26576	8.31205	8.98724	7.95475	9.1456	P	P	P	P	P	P	P	P	P	P	noncoding	uc004epb.3	AF070581	UCSC_knowngene	4939	chrX	+	110367492	110372431	TTCCTAGAGTATGTCATCTTCTATATACTCTATACAGCAGGAATCCTTGCTGTACAACAA	intron sense-overlapping
ASHGA5P046625	0.034988	0.855704	518.874	606.37	8.63189	9.34128	920.68	890.596	472.346	290.943	457.286	606.37	683.861	961.862	290.071	375.256	283.319	518.874	9.07476	9.83716	9.58696	9.47063	8.23095	9.26576	8.31205	8.98724	7.95475	9.1456	P	P	P	P	P	P	P	P	P	P	noncoding	uc004epb.3	AF070581	UCSC_knowngene	4939	chrX	+	110367492	110372431	TTCCTAGAGTATGTCATCTTCTATATACTCTATACAGCAGGAATCCTTGCTGTACAACAA	intron sense-overlapping
ASHGA5P046625	0.034988	0.855704	518.874	606.37	8.63189	9.34128	920.68	890.596	472.346	290.943	457.286	606.37	683.861	961.862	290.071	375.256	283.319	518.874	9.07476	9.83716	9.58696	9.47063	8.23095	9.26576	8.31205	8.98724	7.95475	9.1456	P	P	P	P	P	P	P	P	P	P	noncoding	uc004epb.3	AF070581	UCSC_knowngene	4939	chrX	+	110367492	110372431	TTCCTAGAGTATGTCATCTTCTATATACTCTATACAGCAGGAATCCTTGCTGTACAACAA	intron sense-overlapping
ASHGA5P046625	0.034988	0.855704	518.874	606.37	8.63189	9.34128	920.68	890.596	472.346	290.943	457.286	606.37	683.861	961.862	290.071	375.256	283.319	518.874	9.07476	9.83716	9.58696	9.47063	8.23095	9.26576	8.31205	8.98724	7.95475	9.1456	P	P	P	P	P	P	P	P	P	P	noncoding	uc004epb.3	AF070581	UCSC_knowngene	4939	chrX	+	110367492	110372431	TTCCTAGAGTATGTCATCTTCTATATACTCTATACAGCAGGAATCCTTGCTGTACAACAA	intron sense-overlapping
ASHGA5P046625	0.034988	0.855704	518.874	606.37	8.63189	9.34128	920.68	890.596	472.346	290.943	457.286	606.37	683.861	961.862	290.071	375.256	283.319	518.874	9.07476	9.83716	9.58696	9.47063	8.23095	9.26576	8.31205	8.98724	7.95475	9.1456	P	P	P	P	P	P	P	P	P	P	noncoding	uc004epb.3	AF070581	UCSC_knowngene	4939	chrX	+	110367492	110372431	TTCCTAGAGTATGTCATCTTCTATATACTCTATACAGCAGGAATCCTTGCTGTACAACAA	intron sense-overlapping
ASHGA5P040494	0.0263149	0.855625	3058.82	3574.96	11.2595	12.0035	3830.59	4792.57	3845.24	2090.53	3315.87	3574.96	3526.3	3224.83	4398.59	2288.81	1855.59	3058.82	11.4242	11.907	11.3364	11.9533	12.0461	12.2204	10.8471	11.8855	10.6437	12.0514	P	P	P	P	P	P	P	P	P	P	noncoding	ENST00000520085	RP11-195E2.4	GENCODE	707	chr5	-	70328994	70330227	GTGGCTTGCAAGAGATGCCTTTAATACTCAGAGCATTCTATCTCCCCCTATCTGGTTTAG	intergenic
ASHGA5P057392	0.00757608	0.851914	159.107	186.764	7.12905	7.72292	226.176	176.698	203.551	132.127	195.268	186.764	142.88	151.308	169.665	175.489	156.191	159.107	6.8338	7.70351	6.98389	7.14747	7.46144	8.0633	7.24572	7.83556	7.12042	7.86476	P	P	P	P	P	M	P	P	P	P	noncoding	TCONS_00016651	XLOC_007469	LincRNAs identified by Cabili et al	344	chr9	+	97108945	97109605	AAGAAAAAAACAGGGCCTTGGAAGTTTTGGTTCTTTTTTCCTCCCCTGTTGCAAATTCTT	intergenic
ASHGA5P018716	0.0257529	0.850284	3840.04	4516.19	11.5201	12.3054	5640.39	6305.27	5122.49	2557.8	2954.98	4516.19	3755.76	4999.66	5761.24	3101.82	1581.72	3840.04	11.5158	12.4917	11.9992	12.3533	12.4083	12.6375	11.2845	12.1685	10.3927	11.8762	P	P	P	P	P	P	P	P	P	P	noncoding	ENST00000456726	ANKRD62P1	GENCODE	1181	chr22	-	17134955	17156430	CTGGATACAGGTATAAAATGAAGAGAATGTCTCCTGGACCTAATTGCCACAATGAGATAC	intergenic
ASHGA5P036276	0.0204155	0.847459	234.787	277.048	7.6422	8.2759	379.628	329.384	219.562	177.709	278.958	277.048	256.02	295.174	185.195	266.634	170.913	234.787	7.66927	8.4839	7.8919	8.03487	7.59073	8.17849	7.81229	8.27716	7.2468	8.40507	P	P	P	P	P	P	P	P	P	P	noncoding	ENST00000415236	AC009948.5	GENCODE	662	chr2	+	179278749	179297009	ACATTGATATTGTCCATTGGCGCTCAGTTCATCTGTAATGACACATTCAAGGATGACGAT	natural antisense
ASHGA5P036276	0.0204155	0.847459	234.787	277.048	7.6422	8.2759	379.628	329.384	219.562	177.709	278.958	277.048	256.02	295.174	185.195	266.634	170.913	234.787	7.66927	8.4839	7.8919	8.03487	7.59073	8.17849	7.81229	8.27716	7.2468	8.40507	P	P	P	P	P	P	P	P	P	P	noncoding	ENST00000415236	AC009948.5	GENCODE	662	chr2	+	179278749	179297009	ACATTGATATTGTCCATTGGCGCTCAGTTCATCTGTAATGACACATTCAAGGATGACGAT	natural antisense
ASHGA5P036276	0.0204155	0.847459	234.787	277.048	7.6422	8.2759	379.628	329.384	219.562	177.709	278.958	277.048	256.02	295.174	185.195	266.634	170.913	234.787	7.66927	8.4839	7.8919	8.03487	7.59073	8.17849	7.81229	8.27716	7.2468	8.40507	P	P	P	P	P	P	P	P	P	P	noncoding	ENST00000415236	AC009948.5	GENCODE	662	chr2	+	179278749	179297009	ACATTGATATTGTCCATTGGCGCTCAGTTCATCTGTAATGACACATTCAAGGATGACGAT	natural antisense
ASHGA5P014260	0.0134943	0.84563	626.795	741.217	9.02829	9.70625	785.061	1090.13	764.65	464.313	601.934	741.217	655.437	639.211	432.775	900.007	506.545	626.795	9.01358	9.58696	9.00153	9.76486	8.7997	9.936	9.5336	9.68227	8.79304	9.56117	P	P	P	P	P	P	P	P	P	P	noncoding	uc010zpg.1	LOC728323	UCSC_knowngene	1025	chr2	+	243030843	243102469	AGTCACAGCATAGGCATGGCTATTGCACCTTGGGAGAAACCTTTAATCGGTTAGACTTCT	intergenic
ASHGA5P031126	0.0145056	0.845209	162.723	192.523	7.13801	7.73243	285.086	191.887	151.911	117.211	216.522	192.523	235.849	160.328	135.98	142.864	138.591	162.723	7.5587	8.0633	7.06093	7.26703	7.16427	7.65526	6.96547	7.65594	6.9407	8.02061	P	P	P	P	P	P	P	P	P	M	noncoding	uc002edq.3	BC041879	UCSC_knowngene	2514	chr16	-	33298267	33319211	AAATTTCTTACCCTGGGCCATCTGTCCTGTGTGTCTGTCCTCCTTGTGATCAGTTATTTG	intergenic
ASHGA5P017273	0.0324904	0.844947	691.826	818.781	9.18703	9.8727	1011.67	1035.38	756.975	731.13	558.749	818.781	863.008	625.912	499.44	649.688	821.084	691.826	9.40851	9.98434	8.96886	9.68265	9.00232	9.91953	9.07934	10.3355	9.47614	9.44152	P	P	P	P	P	P	P	P	P	P	noncoding	uc001ker.2	BC082979	UCSC_knowngene	642	chr10	+	89102678	89114936	CCGCGGCGAGGAATCCACTGAAGACCTACATTTCCCGGAAGGTTAACAGCCCCCTTCTCA	intergenic
ASHGA5P033455	0.0239855	0.84494	51.2493	60.6544	5.54104	6.03178	78.1198	71.1493	53.1584	43.7899	57.0549	60.6544	52.0098	37.9686	56.8852	69.3502	40.033	51.2493	5.41333	6.0381	5.13154	5.8839	5.96187	6.1639	5.97605	6.09037	5.22242	5.98265	P	P	P	P	P	P	P	P	P	P	noncoding	TCONS_00028131	XLOC_013489	LincRNAs identified by Cabili et al	203	chr20	+	23161691	23167077	ATCCTCACTGTGACCCAGGCCCCACTGCAGCAAAGAGACACTGGGAATTAGCCCTTCTGT	intergenic
ASHGA5P057201	0.0352823	0.843862	65.9851	78.1942	5.90109	6.33747	122.366	67.4504	51.916	43.8726	105.366	78.1942	78.2224	57.8675	55.4078	59.7963	78.6315	65.9851	5.96241	6.75082	5.68346	5.80401	5.92349	6.13029	5.77712	6.09294	6.15896	6.90926	P	P	P	P	P	P	P	P	P	P	noncoding	TCONS_00014459	XLOC_006677	LincRNAs identified by Cabili et al	1854	chr7	-	157230889	157232826	AAGGAGGTGCTCCTGGAGGTGATGGAGGTGCCCCTGGAGGTGATAGTGAAGGAGGTGCTC	intergenic
ASHGA5P057997	0.00174496	0.841837	60.6913	72.0939	5.79049	6.28667	85.7152	91.3114	63.6856	53.1009	66.6563	72.0939	63.9847	61.9	61.954	67.3156	48.302	60.6913	5.68687	6.18058	5.776	6.21867	6.08173	6.41669	5.93427	6.40386	5.47357	6.21355	P	P	P	P	P	P	P	P	P	P	noncoding	TCONS_00025085	XLOC_012044	LincRNAs identified by Cabili et al	509	chr16	-	86259018	86260383	ATTGATCATCATCTACTTAACAAACGAGGCTCCCCTTTCAATGCACTTGGGTCTCCTCTG	intergenic
ASHGA5P019860	0.0292872	0.841063	326.544	388.251	8.112	8.72859	343.399	625.831	410.079	336.045	225.902	388.251	352.43	303.368	250.705	450.07	276.146	326.544	8.11424	8.34553	7.92882	8.9507	8.03006	9.05786	8.56363	9.20307	7.92323	8.0858	P	P	P	P	P	P	P	P	P	P	noncoding	NR_040060	LOC100131089	RefSeq	2536	chr15	+	40331511	40359710	ACACTGCTGTGGCCCAGAACCATATCCTGCTCCACAAGCCTCGTCCTTGGCAAGAAGTTG	bidirectional
ASHGA5P053199	0.00104787	0.840991	110.34	131.203	6.59074	7.16959	121.218	187.013	139.727	114.234	93.8223	131.203	104.456	128.767	106.306	138.043	74.1305	110.34	6.37191	6.73479	6.75298	7.22988	6.8318	7.54247	6.91896	7.61205	6.07803	6.72875	P	P	P	P	P	P	P	P	P	P	noncoding	ENST00000482799	AC004893.11	GENCODE	796	chr7	+	98643205	98645863	CTTGCTGATGGCCACATTAGCCTAAATGTATGTCTACAGTACCATAAAGGAGGTACCCCA	natural antisense
ASHGA5P053199	0.00104787	0.840991	110.34	131.203	6.59074	7.16959	121.218	187.013	139.727	114.234	93.8223	131.203	104.456	128.767	106.306	138.043	74.1305	110.34	6.37191	6.73479	6.75298	7.22988	6.8318	7.54247	6.91896	7.61205	6.07803	6.72875	P	P	P	P	P	P	P	P	P	P	noncoding	ENST00000482799	AC004893.11	GENCODE	796	chr7	+	98643205	98645863	CTTGCTGATGGCCACATTAGCCTAAATGTATGTCTACAGTACCATAAAGGAGGTACCCCA	natural antisense
ASHGA5P053199	0.00104787	0.840991	110.34	131.203	6.59074	7.16959	121.218	187.013	139.727	114.234	93.8223	131.203	104.456	128.767	106.306	138.043	74.1305	110.34	6.37191	6.73479	6.75298	7.22988	6.8318	7.54247	6.91896	7.61205	6.07803	6.72875	P	P	P	P	P	P	P	P	P	P	noncoding	ENST00000482799	AC004893.11	GENCODE	796	chr7	+	98643205	98645863	CTTGCTGATGGCCACATTAGCCTAAATGTATGTCTACAGTACCATAAAGGAGGTACCCCA	natural antisense
ASHGA5P041910	0.0249947	0.840954	129.905	154.473	6.82321	7.40811	238.522	150.618	114.107	111.315	157.805	154.473	150.06	118.548	112.659	172.12	96.1375	129.905	6.90742	7.78892	6.63684	6.91614	6.91119	7.24298	7.21974	7.56141	6.44087	7.53108	P	P	P	P	P	P	P	P	P	P	noncoding	TCONS_00021409	XLOC_010203	LincRNAs identified by Cabili et al	478	chr12	-	112331317	112333002	GAAAAAATTGAATAACAGATGACTATCCTCTCCCTCTGCTCTGCGAGCTGGAGTCTACCT	intergenic
ASHGA5P045564	0.0145083	0.840614	595.782	708.746	8.97346	9.64081	779.096	940.682	783.311	391.162	649.48	708.746	635.285	621.549	614.827	708.645	398.602	595.782	8.96987	9.57392	8.95555	9.54357	9.28067	9.98126	9.21154	9.43104	8.44965	9.67426	P	P	P	P	P	P	P	P	P	P	noncoding	NR_027447	LOC100289341	RefSeq	1872	chr9	-	139979397	139981269	CCCACTGAGGCTTGCATACTCTGCATTGCAATTATGTGTTATTCTTGATTAAATTCATTT	bidirectional
ASHGA5P019175	0.039034	0.840595	95.2786	113.347	6.37648	6.89	168.158	146.462	116.419	67.1873	68.5067	113.347	126.245	72.3832	126.83	68.6685	82.266	95.2786	6.6503	7.25944	5.97605	6.877	7.06728	7.27568	5.96417	6.7817	6.22459	6.25621	P	P	P	P	P	P	P	P	P	P	noncoding	ENST00000494540	HSD17B7P2	GENCODE	1401	chr10	+	38645307	38667433	TTAAGCAAAGTTGCAGGTTTCAGAGATTAGACCGTATATATCTAAATGCTGGGATCATGC	intergenic
ASHGA5P021622	0.00030666	0.839918	65.241	77.6754	5.88056	6.38811	94.7388	108.748	60.1614	65.5126	59.2162	77.6754	65.4248	71.557	55.3691	79.4792	54.375	65.241	5.71481	6.34338	5.96336	6.46786	5.92212	6.34553	6.16708	6.74552	5.63543	6.03825	P	P	P	P	P	P	P	P	P	P	noncoding	ENST00000536487	NKAPP1	GENCODE	517	chrX	-	119377873	119379122	CTCACGCTCCTACGGGACGAGGAGAGGGAGGTGAATCCGTGGCAGAGGAAAATAATTATA	intergenic
ASHGA5P025996	0.0031124	0.839798	90.8968	108.236	6.31939	6.85065	119.029	166.339	92.0867	65.6879	98.039	108.236	98.5606	125.48	63.3614	82.8662	84.2162	90.8968	6.28601	6.70604	6.71436	7.05346	6.11456	6.9452	6.22421	6.74968	6.25781	6.79887	P	P	P	P	P	P	P	P	P	P	noncoding	NR_049782	SNX17	RefSeq	2600	chr2	+	27593362	27600400	TTAATCACTGCCACAGGCTTCGGAAGGAGTATGGGGCCAATGTGCTTCCTGCATTCCCCC	exon sense-overlapping
ASHGA5P025996	0.0031124	0.839798	90.8968	108.236	6.31939	6.85065	119.029	166.339	92.0867	65.6879	98.039	108.236	98.5606	125.48	63.3614	82.8662	84.2162	90.8968	6.28601	6.70604	6.71436	7.05346	6.11456	6.9452	6.22421	6.74968	6.25781	6.79887	P	P	P	P	P	P	P	P	P	P	noncoding	NR_049782	SNX17	RefSeq	2600	chr2	+	27593362	27600400	TTAATCACTGCCACAGGCTTCGGAAGGAGTATGGGGCCAATGTGCTTCCTGCATTCCCCC	exon sense-overlapping
ASHGA5P025996	0.0031124	0.839798	90.8968	108.236	6.31939	6.85065	119.029	166.339	92.0867	65.6879	98.039	108.236	98.5606	125.48	63.3614	82.8662	84.2162	90.8968	6.28601	6.70604	6.71436	7.05346	6.11456	6.9452	6.22421	6.74968	6.25781	6.79887	P	P	P	P	P	P	P	P	P	P	noncoding	NR_049782	SNX17	RefSeq	2600	chr2	+	27593362	27600400	TTAATCACTGCCACAGGCTTCGGAAGGAGTATGGGGCCAATGTGCTTCCTGCATTCCCCC	exon sense-overlapping
ASHGA5P025996	0.0031124	0.839798	90.8968	108.236	6.31939	6.85065	119.029	166.339	92.0867	65.6879	98.039	108.236	98.5606	125.48	63.3614	82.8662	84.2162	90.8968	6.28601	6.70604	6.71436	7.05346	6.11456	6.9452	6.22421	6.74968	6.25781	6.79887	P	P	P	P	P	P	P	P	P	P	noncoding	NR_049782	SNX17	RefSeq	2600	chr2	+	27593362	27600400	TTAATCACTGCCACAGGCTTCGGAAGGAGTATGGGGCCAATGTGCTTCCTGCATTCCCCC	exon sense-overlapping
ASHGA5P025996	0.0031124	0.839798	90.8968	108.236	6.31939	6.85065	119.029	166.339	92.0867	65.6879	98.039	108.236	98.5606	125.48	63.3614	82.8662	84.2162	90.8968	6.28601	6.70604	6.71436	7.05346	6.11456	6.9452	6.22421	6.74968	6.25781	6.79887	P	P	P	P	P	P	P	P	P	P	noncoding	NR_049782	SNX17	RefSeq	2600	chr2	+	27593362	27600400	TTAATCACTGCCACAGGCTTCGGAAGGAGTATGGGGCCAATGTGCTTCCTGCATTCCCCC	natural antisense
ASHGA5P025996	0.0031124	0.839798	90.8968	108.236	6.31939	6.85065	119.029	166.339	92.0867	65.6879	98.039	108.236	98.5606	125.48	63.3614	82.8662	84.2162	90.8968	6.28601	6.70604	6.71436	7.05346	6.11456	6.9452	6.22421	6.74968	6.25781	6.79887	P	P	P	P	P	P	P	P	P	P	noncoding	NR_049782	SNX17	RefSeq	2600	chr2	+	27593362	27600400	TTAATCACTGCCACAGGCTTCGGAAGGAGTATGGGGCCAATGTGCTTCCTGCATTCCCCC	natural antisense
ASHGA5P047538	0.0317451	0.838402	2856.04	3406.53	11.18	11.9467	2889.89	4768.47	3748.07	2542.76	3083.47	3406.53	2552.19	3748.87	1887.34	2220.92	3870.88	2856.04	10.9636	11.5098	11.5589	11.9488	10.8601	12.1828	10.8119	12.1566	11.7056	11.9358	P	P	P	P	P	P	P	P	P	P	noncoding	NR_029407	LOC642361	RefSeq	1712	chr10	+	81585657	81587358	AAGGCGAGCCATGTTCTAGAGCAATGTCTTTCTTGTATTAAAATACAGCCCCATGCTCAC	intergenic
ASHGA5P028078	0.0321434	0.838335	638.615	761.765	9.03489	9.78337	734.042	972.872	746.981	542.965	811.968	761.766	988.752	501.349	487.617	732.592	482.763	638.615	9.58602	9.49034	8.64197	9.58827	8.96703	9.90372	9.25372	9.92667	8.72574	10.0078	P	P	P	P	P	P	P	P	P	P	noncoding	ENST00000549565	RP11-977G19.11	GENCODE	399	chr12	+	56693925	56708572	GACAGAGCCAAATCTTTTTTCTGAGTCTGTTTTCTTCATTTCTATTAAACCAAGGTCCTT	intronic antisense
ASHGA5P028078	0.0321434	0.838335	638.615	761.765	9.03489	9.78337	734.042	972.872	746.981	542.965	811.968	761.766	988.752	501.349	487.617	732.592	482.763	638.615	9.58602	9.49034	8.64197	9.58827	8.96703	9.90372	9.25372	9.92667	8.72574	10.0078	P	P	P	P	P	P	P	P	P	P	noncoding	ENST00000549565	RP11-977G19.11	GENCODE	399	chr12	+	56693925	56708572	GACAGAGCCAAATCTTTTTTCTGAGTCTGTTTTCTTCATTTCTATTAAACCAAGGTCCTT	natural antisense
ASHGA5P028078	0.0321434	0.838335	638.615	761.765	9.03489	9.78337	734.042	972.872	746.981	542.965	811.968	761.766	988.752	501.349	487.617	732.592	482.763	638.615	9.58602	9.49034	8.64197	9.58827	8.96703	9.90372	9.25372	9.92667	8.72574	10.0078	P	P	P	P	P	P	P	P	P	P	noncoding	ENST00000549565	RP11-977G19.11	GENCODE	399	chr12	+	56693925	56708572	GACAGAGCCAAATCTTTTTTCTGAGTCTGTTTTCTTCATTTCTATTAAACCAAGGTCCTT	natural antisense
ASHGA5P058209	0.019578	0.838096	57.5953	68.7216	5.71483	6.22019	93.5456	62.0981	61.1514	49.8067	77.0063	68.7216	64.5565	55.4969	49.1376	46.9261	71.8595	57.5953	5.69789	6.3225	5.6309	5.68279	5.75311	6.36345	5.45614	6.30187	6.03609	6.43033	P	P	P	P	P	P	P	P	P	P	noncoding	TCONS_00028198	XLOC_013549	LincRNAs identified by Cabili et al	2244	chr20	+	46750576	46755530	CCTCAAAAAGGTCTGCAGCTTCCAGTCCCTCAAATAACAACATTGCTCCTCCCTGGATCT	intergenic
ASHGA5P055007	0.0263957	0.837236	174.543	208.475	7.22645	7.8819	248.02	249.042	168.255	156.015	221.042	208.475	259.539	169.586	160.469	139.865	143.254	174.543	7.68655	7.84677	7.13617	7.64056	7.3815	7.79239	6.93688	8.07759	6.99113	8.05218	P	P	P	P	P	P	P	P	P	P	noncoding	TCONS_00009904	XLOC_004316	LincRNAs identified by Cabili et al	1445	chr5	+	24292126	24322125	TGCCCTCCCTCTTTTGGTAAGCAAAACACTGATGCTTATGACATCTTCCTTTTCTTTGGT	intergenic
ASHGA5P034479	0.033204	0.836105	46.8328	56.0131	5.44165	5.94021	59.8791	55.5149	45.0203	58.0772	61.5738	56.0131	39.9531	47.3193	48.9969	55.5112	42.3834	46.8328	5.06169	5.62026	5.41881	5.52865	5.74888	5.91332	5.68137	6.54586	5.29747	6.09294	P	P	P	P	P	P	P	P	P	P	noncoding	ENST00000420038	CTD-3105H18.7	GENCODE	695	chr19	+	12561748	12571519	GGAAAAAATCATAACTATATTAAGAATAAAAAATAAAAAATTCCTAAGGAAAATACTTGA	intergenic
ASHGA5P022601	0.00663958	0.835807	2862.2	3424.48	11.2075	11.9543	3789.8	4654.15	3059.73	2391.63	3227.07	3424.48	2348.09	2470.64	2790.18	2895.73	3806.36	2862.2	10.8411	11.8983	10.9313	11.9119	11.3969	11.8806	11.1821	12.0687	11.6863	12.0122	P	P	P	P	P	P	P	P	P	P	noncoding	ENST00000559458	XXbac-BPG300A18.13	GENCODE	656	chr6	-	32152515	32153659	TGATGTGGAGGCATGGGCCGGGGGCAGTTCTCTCCTCACTTGTAAACTTGTGTAGTTTCA	exon sense-overlapping
ASHGA5P016376	0.018062	0.835631	1255.85	1502.88	10.0135	10.752	1606.51	1997.83	1734.42	1213.62	961.997	1502.88	1495.92	1164.6	1649.66	974.494	994.589	1255.85	10.1695	10.6695	9.84238	10.6598	10.6634	11.0728	9.63938	11.0909	9.75296	10.2671	P	P	P	P	P	P	P	P	P	P	noncoding	ENST00000446528	RP4-717I23.3	GENCODE	489	chr1	-	93730201	93792474	CAACATACAAGAGGGCTCTGAGAGATTTCATTTCTGTCCTGCTGATGAAGTCTACGTTCA	natural antisense
ASHGA5P057679	0.0157428	0.832856	83.8715	100.704	6.21762	6.71483	123.487	144.131	83.0967	48.8885	103.914	100.704	97.9528	110.064	74.2847	70.8777	66.1787	83.8715	6.27777	6.766	6.53909	6.85307	6.33859	6.79634	6.00637	6.2712	5.92628	6.88752	P	P	P	P	P	P	P	P	P	P	noncoding	TCONS_00020677	XLOC_009982	LincRNAs identified by Cabili et al	603	chr12	-	3865740	3867330	AGGACTCCAGATTTGTAAAAACCTCTTCCAGTCTCCTGCTTGGTTCTTCTGTTCCTCTCT	intergenic
ASHGA5P054879	0.0205722	0.831964	235.961	283.62	7.65464	8.33519	346.347	315.312	274.985	199.328	282.126	283.619	229.936	238.551	282.57	273.983	154.766	235.961	7.52262	8.35895	7.60067	7.97128	8.19143	8.49458	7.85212	8.43286	7.10634	8.41825	P	P	P	P	P	P	P	P	P	P	noncoding	TCONS_00008588	XLOC_004093	LincRNAs identified by Cabili et al	248	chr4	-	139202777	139207245	ATTCCACTGGGAGAAAAGAGGATCTAAATGCCAGGCTCACCCCTCACATTCTATTCAACT	intergenic
ASHGA5P022764	0.0259567	0.831638	61.5947	74.0643	5.77408	6.32609	91.7928	89.337	75.5065	55.3944	58.2908	74.0643	55.0106	79.7265	78.1433	57.0471	38.046	61.5947	5.49122	6.29277	6.10315	6.18961	6.41066	6.65958	5.71429	6.47491	5.15109	6.01359	P	P	P	P	P	P	P	P	P	P	noncoding	ENST00000562376	RP11-141O15.1	GENCODE	467	chr16	-	22298233	22300057	ATAAAAGCCATGAAAACAGGGCCAGGTGCAGTGGAATAAGTTCTCCTAGCTCAGAAGGAT	natural antisense
ASHGA5P052875	0.014977	0.829518	50.9743	61.4505	5.49202	6.03769	93.4051	61.7609	58.913	50.9351	42.2382	61.4505	73.6904	53.9256	45.8262	54.5645	26.8646	50.9743	5.87835	6.32086	5.59197	5.67547	5.6491	6.31458	5.66037	6.33349	4.68028	5.54405	P	M	P	P	P	P	P	P	P	P	noncoding	uc003qlv.3	LOC729178	UCSC_knowngene	1551	chr6	-	147182941	147453122	TACAAAAAAAGAAAAAGAAAATTACTACTGTGAAGTGAAGTCTGAGCAACTGGGAAGAAA	intergenic
[truncated: 862 more rows]
[truncated: 6 more columns]
