# Supplementary material for: m6A-mediated DGUOK-AS1 stabilized by RBM15 and HNRNPH1 promotes lung adenocarcinoma progression
Source: Research Square preprint supplement (doi:10.21203/rs.3.rs-7158958/v1), 2025-08-06
Supplement: Supplementary file 4 [file b11b3a1f06909705331cbf5a.docx]

**Supplemental Figure legends**

**Supplemental Figure 1 The subcellular localization of DGUOK-AS1 in LUAD cells.** (A) Kaplan-Meier analysis of the overall survival in NSCLC patients according to DGUOK-AS1 expression. (B) FISH analysis of DGUOK-AS1 (red) and DGUOK-AS1 202 (green) in H1975 cells. (C) DGUOK-AS1 201/202 expression in the cytoplasm and nucleus of H1975 cells.

**Supplemental Figure 2** **DGUOK-AS1 promotes proliferation and migration of LUAD cells.** (A, B) The expression of DGUOK-AS1 in A549 and H1975 cells after knocking down or overexpressing DGUOK-AS1 by qRT-PCR analysis. (C) CCK-8 assay was performed to measure the cell proliferation of A549 and H1975 cells transfected with DGUOK-AS1 siRNA or scrambled controls. (D) Cell proliferation analysis of A549 and H1975 cells transfected with DGUOK-AS1 201, DGUOK-AS1 202 overexpression vector or control vector. All data are presented as the mean ± SEM. **P* < 0.05, ****P* < 0.001. (E, F) Wound healing migration assay of A549 and H1975 cells with DGUOK-AS1 knocked down or overexpressed. White scale bar, 200 μm.

**Supplemental Figure 3 DGUOK-AS1 201 functions as the ceRNA of miR-2467-5p to promote cell proliferation and migration.** (A) Dual luciferase assay in H1975 cells co-transfected with WT or MUT DGUOK-AS1 201 luciferase vectors and miR-2467-5p mimics. (B) RIP assay of the enrichment of DGUOK-AS1 on Ago2 relative to IgG in H1975 cells. (C) The proliferation of A549 cells with DGUOK-AS1 201 overexpression with or without overexpressing miR-2467-5p. Data are presented as the mean ± SEM of three independent experiments. ***P* < 0.01, ****P* < 0.001; ns, not significant. (D) Wound healing migration assay of A549 cells co-transfected with DGUOK-AS1 201 overexpression vector and miR-2467-5p mimic. White scale bar, 200 μm.

**Supplemental Figure 4 Knocking down PRMT5 inhibits LUAD cells proliferation and migration.** (A) The protein expression of PRMT5 was inhibited in A549 and H1975 cells. (B-D) Cell proliferation and migration analysis of A549 and H1975 cells following PRMT5 knockdown. Black scale bar, 100 μm. All data are presented as the mean ± SEM. **P* < 0.05, ***P* < 0.01, ****P* < 0.001.

**Supplemental Figure 5** **RBM15 knockdown suppresses cell proliferation and migration.** (A) Diagram of the m6A sites on DGUOK-AS1 201/202 and the nucleotide sequence of the region spanning 300-325bp on DGUOK-AS1 202. (B-E) The mRNA and protein levels of RBM15 were identified following its knockdown or overexpression using qRT-PCR and western blotting assay. CCK-8 (F) and colony formation assay (G) were used to evaluate the proliferation of A549 and H1975 cells following with knocked down RBM15. (H, I) Transwell and wound healing migration assay in RBM15 knockdown A549 and H1975 cells. Black scale bar, 100 μm; white scale bar, 200 μm. All data are presented as the mean ± SEM of three independent experiments. ***P* < 0.01, ****P* < 0.001.

**Supplemental Figure 6** The expression of HNRNPH1 in LUAD. The qRT-PCR (A, B) and western blotting (C, D) were used to determine the expression levels of HNRNPH1 after its knockdown or overexpression. (E) The expression of HNRNPH1 in TCGA-LUAD database on the GEPIA online tool. The mRNA (F) and protein (G) expression levels of HNRNPH1 in BEAS-2B, A549 and H1975 cells. Data are reported as mean ± SEM from three independent experimental runs. **P* < 0.05, ***P* < 0.01, ****P* < 0.001.
